# Supplementary material
Source: publisher site journal article supplement (https://www.spandidos-publications.com/5619/downloadSupplementary)
Supplement: Supplementary file 1 [file downloadSupplementary]

## Sheet: Sheet1
Table SI. SO vs NSL_Proteins ALL.
Accession	Gene Name	Description	Coverage [%]	# Peptides	# PSMs	# Unique Peptides	# AAs	MW [kDa]	calc. pI	Score Sequest HT: Sequest HT	Abundances-case1	Abundances -case2	Abundances -case3	Abundances -Con1	Abundances -Con2	Abundances -Con3	FC	P value	NCBI_gene_ID
E9Q616	Ahnak	AHNAK nucleoprotein (desmoyokin) OS=Mus musculus OX=10090 GN=Ahnak PE=1 SV=1	67	214	506	213	5656	603.9	6.3	877.84	78	77	77.3	122.8	123.1	121.8	0.631765	8.47706e-08	66395
Q8VDD5	Myh9	Myosin-9 OS=Mus musculus OX=10090 GN=Myh9 PE=1 SV=4	49	107	325	87	1960	226.2	5.66	654.93	106.9	105.4	106.3	93.6	93.5	94.3	1.1322	1.61099e-05	17886
Q8BTM8	Flna	Filamin-A OS=Mus musculus OX=10090 GN=Flna PE=1 SV=5	50	112	255	100	2647	281	6.04	523	103.6	101.8	101.7	96.8	99.4	96.8	1.04812	0.0115373	192176
Q9QXS1	Plec	Plectin OS=Mus musculus OX=10090 GN=Plec PE=1 SV=3	36	164	234	160	4691	533.9	5.96	459.88	95.3	95.4	94.7	104.9	106.2	103.5	0.907184	0.000274505	18810
P26039	Tln1	Talin-1 OS=Mus musculus OX=10090 GN=Tln1 PE=1 SV=2	48	107	231	94	2541	269.7	6.18	519.66	97.6	96.7	95.5	102.7	105.2	102.4	0.933935	0.00314984	21894
P16546	Sptan1	Spectrin alpha chain, non-erythrocytic 1 OS=Mus musculus OX=10090 GN=Sptan1 PE=1 SV=4	49	116	233	1	2472	284.4	5.33	483.39	98.3	95.2	95.7	103.5	93.6	113.7	0.930502	0.288064	20740
A3KGU9	Sptan1	Spectrin alpha chain, non-erythrocytic 1 OS=Mus musculus OX=10090 GN=Sptan1 PE=1 SV=2	49	116	233	1	2498	287.4	5.35	485.45	86.8	86.1	85.7	113.3	115.1	113	0.757469	2.92744e-06	20740
Q62261	Sptbn1	Spectrin beta chain, non-erythrocytic 1 OS=Mus musculus OX=10090 GN=Sptbn1 PE=1 SV=2	47	106	205	100	2363	274.1	5.58	412.57	86.3	86.1	86.3	112.9	116	112.5	0.757762	1.5495e-05	20742
Q9JHU4	Dync1h1	Cytoplasmic dynein 1 heavy chain 1 OS=Mus musculus OX=10090 GN=Dync1h1 PE=1 SV=2	28	129	216	129	4644	531.7	6.42	366.41	99.2	99.2	98.5	102	99	102	0.979868	0.118782	13424
P07724	Alb	Serum albumin OS=Mus musculus OX=10090 GN=Alb PE=1 SV=3	72	50	363	50	608	68.6	6.07	674.59	86	85.2	85.2	113.6	116.4	113.6	0.746217	7.40722e-06	11657
B1ARU1	Macf1	Microtubule-actin cross-linking factor 1 OS=Mus musculus OX=10090 GN=Macf1 PE=1 SV=1	23	120	151	108	5895	662.9	5.3	301.3	92.9	92.8	93.2	106.5	105.7	108.9	0.868577	0.000130918	11426
E9QPE7	Myh11	Myosin-11 OS=Mus musculus OX=10090 GN=Myh11 PE=1 SV=2	38	80	167	1	1972	227	5.48	335.09	90.7	89.5	89.1	111.2	110.8	108.7	0.814333	2.33728e-05	17880
A0A2R8VHF9	Myh11	Myosin-11 OS=Mus musculus OX=10090 GN=Myh11 PE=1 SV=1	39	80	168	1	1938	223.2	5.5	334.82	85	107	84.4	121.8	109.1	92.8	0.853877	0.232411	17880
Q6URW6	Myh14	Myosin-14 OS=Mus musculus OX=10090 GN=Myh14 PE=1 SV=1	37	71	146	63	2000	228.4	5.55	284.2	90.1	90.4	89.4	109.9	111.2	109	0.817631	9.01323e-06	71960
Q3UH59	Myh10	Myosin-10 OS=Mus musculus OX=10090 GN=Myh10 PE=1 SV=1	37	76	150	57	2013	233.3	5.57	326.93	80.7	82	81.2	119.8	118.9	117.5	0.684728	1.06472e-06	77579
Q02566	Myh6	Myosin-6 OS=Mus musculus OX=10090 GN=Myh6 PE=1 SV=2	44	88	142	62	1938	223.4	5.73	275.01	72.7	73.1	72.3	128.7	126.8	126.5	0.570942	1.87375e-07	17888
Q80X90	Flnb	Filamin-B OS=Mus musculus OX=10090 GN=Flnb PE=1 SV=3	38	80	133	68	2602	277.7	5.71	231.01	101.1	101.1	101.8	99.2	96.3	100.4	1.02737	0.0948644	286940
P19096	Fasn	Fatty acid synthase OS=Mus musculus OX=10090 GN=Fasn PE=1 SV=2	32	70	146	70	2504	272.3	6.58	254.05	113.2	114.4	112.9	85.8	88.1	85.5	1.31264	8.71762e-06	14104
E9Q035	Gm20425	Uncharacterized protein OS=Mus musculus OX=10090 GN=Gm20425 PE=4 SV=1	48	47	204	8	978	107.7	7.77	454.92	92.9	92	92.2	105.1	112.1	105.7	0.85816	0.00249022	-
A2AVJ7	Rrbp1	Ribosome-binding protein 1 OS=Mus musculus OX=10090 GN=Rrbp1 PE=1 SV=1	60	70	120	70	1464	158.3	9.19	243.06	83.9	83	84.7	118.3	113.6	116.6	0.721951	2.46469e-05	81910
Q64727	Vcl	Vinculin OS=Mus musculus OX=10090 GN=Vcl PE=1 SV=4	54	59	142	59	1066	116.6	6	291.72	87.1	86.5	86.9	113.5	113.3	112.7	0.767305	9.85035e-08	22330
Q921I1	Tf	Serotransferrin OS=Mus musculus OX=10090 GN=Tf PE=1 SV=1	58	42	196	3	697	76.7	7.18	436.74	97	93	97.4	103.1	110.8	98.7	0.919386	0.0918585	-
P01027	C3	Complement C3 OS=Mus musculus OX=10090 GN=C3 PE=1 SV=3	41	65	134	65	1663	186.4	6.73	256.01	84.6	82.8	85.4	117.4	115.7	114.2	0.727901	1.26117e-05	12266
Q9JKF1	Iqgap1	Ras GTPase-activating-like protein IQGAP1 OS=Mus musculus OX=10090 GN=Iqgap1 PE=1 SV=2	35	54	116	51	1657	188.6	6.48	191.44	112.6	110.7	110.7	89.7	87.5	88.8	1.25564	1.47175e-05	29875
Q68FD5	Cltc	Clathrin heavy chain 1 OS=Mus musculus OX=10090 GN=Cltc PE=1 SV=3	37	55	119	55	1675	191.4	5.69	250.34	108.2	106.6	105.4	92.8	94.6	92.4	1.14439	0.000218017	67300
P60710	Actb	Actin, cytoplasmic 1 OS=Mus musculus OX=10090 GN=Actb PE=1 SV=1	63	19	321	3	375	41.7	5.48	648.59	105.2	106.6	105.9	92.3	95.9	94.1	1.1254	0.000451209	11461
B1B0C7	Hspg2	Basement membrane-specific heparan sulfate proteoglycan core protein OS=Mus musculus OX=10090 GN=Hspg2 PE=1 SV=1	21	68	124	8	4375	468.7	6.48	231.25	90.5	91.8	91.2	109	108.8	108.7	0.837672	1.36106e-06	15530
Q61554	Fbn1	Fibrillin-1 OS=Mus musculus OX=10090 GN=Fbn1 PE=1 SV=2	26	62	112	60	2873	312.1	4.92	183.08	105.7	106.6	105.3	93.3	94	95.1	1.12465	5.52993e-05	14118
Q05793	Hspg2	Basement membrane-specific heparan sulfate proteoglycan core protein OS=Mus musculus OX=10090 GN=Hspg2 PE=1 SV=1	22	63	119	3	3707	398	6.32	215.87	96	91.8	96.6	107	103.8	104.8	0.901141	0.00429084	15530
P20029	Hspa5	Endoplasmic reticulum chaperone BiP OS=Mus musculus OX=10090 GN=Hspa5 PE=1 SV=3	58	43	144	40	655	72.4	5.16	277.11	119.2	114.3	117.2	83.9	81.2	84.2	1.40674	3.88875e-05	14828
P26041	Msn	Moesin OS=Mus musculus OX=10090 GN=Msn PE=1 SV=3	59	46	151	34	577	67.7	6.6	281.9	92	91.1	92.1	107.8	109.8	107.3	0.84703	3.6703e-05	17698
A0A0R4J0Z1	Pdia4	Protein disulfide-isomerase A4 OS=Mus musculus OX=10090 GN=Pdia4 PE=1 SV=1	50	34	99	34	641	72.3	5.22	204.68	146	140.4	142.5	55.6	57.2	58.4	2.50526	1.21508e-06	12304
P13542	Myh8	Myosin-8 OS=Mus musculus OX=10090 GN=Myh8 PE=2 SV=2	31	63	96	19	1937	222.6	5.83	181.67	35.7	36.7	36	170.1	155.7	165.8	0.220504	7.49378e-06	17885
P63017	Hspa8	Heat shock cognate 71 kDa protein OS=Mus musculus OX=10090 GN=Hspa8 PE=1 SV=1	61	35	125	26	646	70.8	5.52	229.29	111	109.2	111.7	90.3	87	90.8	1.23797	0.000111222	15481
Q5SX40	Myh1	Myosin-1 OS=Mus musculus OX=10090 GN=Myh1 PE=1 SV=1	32	66	100	11	1942	223.2	5.76	177.89	48	50.1	49.3	153.7	148.1	150.8	0.325674	4.99439e-07	17879
A1BN54	Actn1	Alpha actinin 1a OS=Mus musculus OX=10090 GN=Actn1 PE=1 SV=1	52	42	94	3	887	102.7	5.48	169.45	104.6	103.7	103.2	94.8	99.4	94.2	1.0801	0.010428	109711
Q7TPR4	Actn1	Alpha-actinin-1 OS=Mus musculus OX=10090 GN=Actn1 PE=1 SV=1	50	40	91	1	892	103	5.38	172.69	106.6	112.8	86.1	76.1	130.1	88.5	1.03665	0.852961	109711
P08071	Ltf	Lactotransferrin OS=Mus musculus OX=10090 GN=Ltf PE=1 SV=4	53	35	90	35	707	77.8	8.53	189.08	132.8	131.7	131.2	67.6	68.2	68.3	1.93876	2.64945e-08	17002
A0A087WS56	Fn1	Fibronectin OS=Mus musculus OX=10090 GN=Fn1 PE=1 SV=1	26	47	86	47	2266	249.4	5.82	186.83	93.4	92.4	94	106.4	105	108.8	0.873829	0.000363409	14268
P11499	Hsp90ab1	Heat shock protein HSP 90-beta OS=Mus musculus OX=10090 GN=Hsp90ab1 PE=1 SV=3	55	40	116	26	724	83.2	5.03	204.44	114.1	111.6	110.4	87	88.6	88.3	1.27359	3.59232e-05	15516
A0A286YDF5	Myof	Myoferlin OS=Mus musculus OX=10090 GN=Myof PE=1 SV=1	31	56	88	56	2061	234.4	6.14	167.6	102.9	104.2	103.9	96.5	95.9	96.7	1.07575	9.26826e-05	226101
E9PWQ3	Col6a3	Collagen, type VI, alpha 3 OS=Mus musculus OX=10090 GN=Col6a3 PE=1 SV=2	18	54	101	4	3284	353.7	6.93	179.25	89.5	91.2	91	108	113.7	106.5	0.827849	0.00112901	12835
A0A1L1SV25	Actn4	Alpha-actinin-4 OS=Mus musculus OX=10090 GN=Actn4 PE=1 SV=1	47	39	85	26	932	107	5.36	173.36	100.8	103.4	101.8	98.9	99.8	95.3	1.04082	0.0634008	60595
A2ASS6	Ttn	Titin OS=Mus musculus OX=10090 GN=Ttn PE=1 SV=1	3	90	96	90	35213	3904.1	6.2	115.54	71.5	76.6	75.7	126.3	125.5	124.5	0.594738	6.70417e-06	22138
A0A087WS16	Col6a3	Collagen, type VI, alpha 3 OS=Mus musculus OX=10090 GN=Col6a3 PE=1 SV=1	21	51	98	1	2677	288.5	8.53	177.43	83.2	85.5	79.3	134.2	92.6	125.2	0.704545	0.0532257	12835
E9Q6R7	Utrn	Utrophin OS=Mus musculus OX=10090 GN=Utrn PE=1 SV=1	20	59	74	58	3430	392.5	5.33	145.33	87.1	87.8	87.9	113.2	109.9	114.1	0.779359	4.46581e-05	22288
P15508	Sptb	Spectrin beta chain, erythrocytic OS=Mus musculus OX=10090 GN=Sptb PE=1 SV=4	27	54	80	49	2128	245.1	5.33	150.63	86.2	93	88.2	112.1	110.1	110.4	0.803969	0.000502632	20741
Q8VDN2	Atp1a1	Sodium/potassium-transporting ATPase subunit alpha-1 OS=Mus musculus OX=10090 GN=Atp1a1 PE=1 SV=1	36	33	67	21	1023	112.9	5.45	127.75	101.7	104.7	102.1	96.6	98.7	96.2	1.05832	0.00966685	11928
G3UW82	Myh2	MCG140437, isoform CRA_d OS=Mus musculus OX=10090 GN=Myh2 PE=1 SV=1	23	52	82	1	1942	223.1	5.77	154	68.8	79	85.7	127.3	111.7	127.5	0.637108	0.00349178	17882
P58252	Eef2	Elongation factor 2 OS=Mus musculus OX=10090 GN=Eef2 PE=1 SV=2	39	34	87	32	858	95.3	6.83	157.57	111.2	107.4	108	90.6	92.7	90.1	1.19459	0.000238592	13629
P07901	Hsp90aa1	Heat shock protein HSP 90-alpha OS=Mus musculus OX=10090 GN=Hsp90aa1 PE=1 SV=4	50	35	95	23	733	84.7	5.01	155.61	105.6	104.4	104.4	94.4	99.6	91.6	1.10084	0.0156355	15519
P20152	Vim	Vimentin OS=Mus musculus OX=10090 GN=Vim PE=1 SV=3	62	38	97	31	466	53.7	5.12	178.22	108.5	105.4	105.8	94.4	92.3	93.5	1.14097	0.000329791	22352
P08032	Spta1	Spectrin alpha chain, erythrocytic 1 OS=Mus musculus OX=10090 GN=Spta1 PE=1 SV=3	25	54	69	53	2415	279.7	5.03	137.12	81.9	82	83.2	116.5	117.4	119.1	0.7	2.19701e-06	20739
P08113	Hsp90b1	Endoplasmin OS=Mus musculus OX=10090 GN=Hsp90b1 PE=1 SV=2	45	38	111	36	802	92.4	4.82	220.98	143	137.9	139.5	58.6	61.9	59.1	2.34076	1.58992e-06	22027
F8VQJ3	Lamc1	Laminin subunit gamma-1 OS=Mus musculus OX=10090 GN=Lamc1 PE=1 SV=1	32	43	77	43	1607	177.1	5.19	148.5	87.6	88.8	87.6	111.6	112.6	111.9	0.785481	1.10098e-06	226519
Q61001	Lama5	Laminin subunit alpha-5 OS=Mus musculus OX=10090 GN=Lama5 PE=1 SV=4	15	46	66	44	3718	403.8	6.73	118.43	91.1	92.4	91.1	109.5	107.2	108.7	0.843884	2.96548e-05	16776
B9EHJ3	Tjp1	Tight junction protein ZO-1 OS=Mus musculus OX=10090 GN=Tjp1 PE=1 SV=1	26	35	68	2	1685	188.7	6.67	145.36	83	88.8	92.2	125.9	100.1	110.1	0.785481	0.0394269	21872
P63268	Actg2	Actin, gamma-enteric smooth muscle OS=Mus musculus OX=10090 GN=Actg2 PE=1 SV=1	59	18	246	3	376	41.9	5.48	447.59	84.3	96.5	84.6	104.4	112	118.2	0.793186	0.0151795	11468
P48678	Lmna	Prelamin-A/C OS=Mus musculus OX=10090 GN=Lmna PE=1 SV=2	60	38	80	38	665	74.2	6.98	176.26	91.3	91.3	89.9	108.3	109.8	109.3	0.832315	9.01684e-06	16905
P02088	Hbb-b1	Hemoglobin subunit beta-1 OS=Mus musculus OX=10090 GN=Hbb-b1 PE=1 SV=2	79	12	283	2	147	15.8	7.65	576.09	71.4	71.5	68.6	120.8	142.2	125.5	0.544402	0.000847282	-
P39447	Tjp1	Tight junction protein ZO-1 OS=Mus musculus OX=10090 GN=Tjp1 PE=1 SV=2	25	35	68	2	1745	194.6	6.64	145.48	83.8	85.4	84.7	115.5	116.2	114.4	0.733603	1.6019e-06	21872
E9Q5F4	Actb	Actin, cytoplasmic 1 (Fragment) OS=Mus musculus OX=10090 GN=Actb PE=1 SV=1	72	15	215	1	265	29.4	5.11	436.98							#DIV/0!	#DIV/0!	11461
Q61233	Lcp1	Plastin-2 OS=Mus musculus OX=10090 GN=Lcp1 PE=1 SV=4	54	29	82	25	627	70.1	5.33	146.55	132.8	128.2	131.6	69.1	69.8	68.6	1.89205	1.68152e-06	18826
P68134	Acta1	Actin, alpha skeletal muscle OS=Mus musculus OX=10090 GN=Acta1 PE=1 SV=1	59	18	246	2	377	42	5.39	454.15	98.9	104.1	97.1	98.6	106.6	94.7	1.00067	0.987755	11459
P52480	Pkm	Pyruvate kinase PKM OS=Mus musculus OX=10090 GN=Pkm PE=1 SV=4	64	33	93	31	531	57.8	7.47	170.16	121.9	121.1	121.3	77	82	76.7	1.54561	1.59483e-05	18746
Q61292	Lamb2	Laminin subunit beta-2 OS=Mus musculus OX=10090 GN=Lamb2 PE=1 SV=2	31	46	67	46	1799	196.5	6.67	120.99	89.2	89.1	90.1	111.6	110.8	109.2	0.809409	1.08284e-05	16779
P24549	Aldh1a1	Retinal dehydrogenase 1 OS=Mus musculus OX=10090 GN=Aldh1a1 PE=1 SV=5	51	25	82	14	501	54.4	7.8	171.02	80.5	76.9	79.1	122.6	119.9	120.9	0.650798	5.50185e-06	11668
A0A1L1SQ51	Tln2	Talin-2 OS=Mus musculus OX=10090 GN=Tln2 PE=1 SV=1	20	43	64	29	2544	271.8	5.57	124.6	93.1	93.5	96.4	105.5	104.7	106.8	0.892744	0.000715584	70549
P27773	Pdia3	Protein disulfide-isomerase A3 OS=Mus musculus OX=10090 GN=Pdia3 PE=1 SV=2	55	33	90	33	505	56.6	6.21	160.89	122.4	118.4	119.5	79.1	80.8	79.9	1.5025	6.34228e-06	14827
Q61838	Pzp	Pregnancy zone protein OS=Mus musculus OX=10090 GN=Pzp PE=1 SV=3	30	40	99	40	1495	165.7	6.68	157.21	82.8	84	82.6	114.6	120.9	115	0.711555	8.53901e-05	11287
P68369	Tuba1a	Tubulin alpha-1A chain OS=Mus musculus OX=10090 GN=Tuba1a PE=1 SV=1	52	18	93	4	451	50.1	5.06	184.26	98.4	95.9	96.7	101.7	103.5	103.7	0.942052	0.00359118	22142
P14733	Lmnb1	Lamin-B1 OS=Mus musculus OX=10090 GN=Lmnb1 PE=1 SV=3	49	35	66	35	588	66.7	5.16	128.51	107.6	105.4	106.9	95	91	94.1	1.14209	0.000644267	16906
P17563	Selenbp1	Methanethiol oxidase OS=Mus musculus OX=10090 GN=Selenbp1 PE=1 SV=2	60	23	79	23	472	52.5	6.29	164.61	90.7	89.6	92.4	112.9	105.4	108.9	0.833435	0.0014237	20341
P40142	Tkt	Transketolase OS=Mus musculus OX=10090 GN=Tkt PE=1 SV=1	48	29	79	29	623	67.6	7.5	131.99	120.2	114.8	115.7	81.6	84.8	82.9	1.40674	6.00704e-05	21881
Q61768	Kif5b	Kinesin-1 heavy chain OS=Mus musculus OX=10090 GN=Kif5b PE=1 SV=3	38	33	45	33	963	109.5	6.44	100.77	98.1	100.2	97.3	102.7	103.2	98.5	0.971091	0.163891	16573
P14824	Anxa6	Annexin A6 OS=Mus musculus OX=10090 GN=Anxa6 PE=1 SV=3	48	32	73	31	673	75.8	5.5	132.44	103.6	99.9	101.5	99.3	96.2	99.6	1.03355	0.096627	11749
P14211	Calr	Calreticulin OS=Mus musculus OX=10090 GN=Calr PE=1 SV=1	56	23	65	23	416	48	4.49	131.24	135	126.1	131.3	70	68.1	69.5	1.89017	2.00935e-05	12317
M0QWP1	Agrn	Agrin OS=Mus musculus OX=10090 GN=Agrn PE=1 SV=1	24	35	55	35	2034	216.5	6.15	113.37	89.1	90.2	91.8	111.2	107.7	109.9	0.824513	0.000116982	11603
P09103	P4hb	Protein disulfide-isomerase OS=Mus musculus OX=10090 GN=P4hb PE=1 SV=2	50	27	76	27	509	57	4.88	154.63	94.2	92.8	94	107.1	105.8	106.2	0.880602	2.61211e-05	18453
O55103	Prx	Periaxin OS=Mus musculus OX=10090 GN=Prx PE=1 SV=1	31	36	70	1	1391	147.6	8.1	122.83	77	77.3	76.4	124.7	121.7	122.9	0.624695	9.04929e-07	19153
Q9WTI7	Myo1c	Unconventional myosin-Ic OS=Mus musculus OX=10090 GN=Myo1c PE=1 SV=2	36	37	69	37	1063	121.9	9.35	128.58	86	85.8	87.9	115.6	110.1	114.7	0.762926	0.000124641	17913
Q6NVF7	Prx	Periaxin OS=Mus musculus OX=10090 GN=Prx PE=1 SV=1	33	36	68	1	1391	147.4	8.16	120.76	108.8	88.4	101.4	96.7	115.4	89.3	0.99071	0.928641	19153
P47738	Aldh2	Aldehyde dehydrogenase, mitochondrial OS=Mus musculus OX=10090 GN=Aldh2 PE=1 SV=1	49	20	74	18	519	56.5	7.62	156.34	88.6	86.2	86.8	116.4	107.3	114.8	0.772821	0.000899788	11669
Q01853	Vcp	Transitional endoplasmic reticulum ATPase OS=Mus musculus OX=10090 GN=Vcp PE=1 SV=4	46	33	56	33	806	89.3	5.26	109.36	109.1	108.7	110.1	91.5	89.9	90.8	1.20463	7.53584e-06	269523
A0A0R4J0I9	Lrp1	Low density lipoprotein receptor-related protein 1 OS=Mus musculus OX=10090 GN=Lrp1 PE=1 SV=1	11	47	61	47	4545	504.4	5.36	110.85	101.4	103.8	99.7	99.8	96.3	99.1	1.03286	0.113277	16971
E9Q0S6	Tns1	Tensin 1 OS=Mus musculus OX=10090 GN=Tns1 PE=1 SV=1	29	42	69	39	1888	201.3	7.75	118.26	81.1	79.4	80.2	118.6	120.4	120.2	0.6701	7.86438e-07	21961
P02089	Hbb-b2	Hemoglobin subunit beta-2 OS=Mus musculus OX=10090 GN=Hbb-b2 PE=1 SV=2	75	12	207	5	147	15.9	8.05	421.76	73.2	75	74.3	119	132.9	125.6	0.589404	0.00021719	-
E9Q7G0	Numa1	Nuclear mitotic apparatus protein 1 OS=Mus musculus OX=10090 GN=Numa1 PE=1 SV=1	22	42	53	28	2094	235.5	5.87	98.57	101.8	102	101.2	96.7	99.9	98.3	1.03425	0.0242946	101706
P07356	Anxa2	Annexin A2 OS=Mus musculus OX=10090 GN=Anxa2 PE=1 SV=2	51	21	86	21	339	38.7	7.69	195.82	100.5	100.6	100.6	97.3	102.9	98.1	1.0114	0.552302	12306
Q61789	Lama3	Laminin subunit alpha-3 OS=Mus musculus OX=10090 GN=Lama3 PE=1 SV=4	15	43	61	40	3330	366	6.65	91.18	85.3	87.4	84.7	115.7	113.3	113.8	0.750875	1.31246e-05	16774
F6TFN2	Lmo7	LIM domain only 7 (Fragment) OS=Mus musculus OX=10090 GN=Lmo7 PE=1 SV=1	38	38	57	2	1189	133.9	5.99	114.94	80.2	78.5	83.1	122.7	110.3	125.2	0.675042	0.0012713	380928
Q6PDN3	Mylk	Myosin light chain kinase, smooth muscle OS=Mus musculus OX=10090 GN=Mylk PE=1 SV=3	22	36	57	36	1941	212.8	6.25	108.5	90	88.6	87.3	111.1	111.7	111.3	0.79587	9.0945e-06	107589
Q02053	Uba1	Ubiquitin-like modifier-activating enzyme 1 OS=Mus musculus OX=10090 GN=Uba1 PE=1 SV=1	33	28	49	28	1058	117.7	5.66	105.45	104.5	101.8	101.4	98.3	97.4	96.6	1.05269	0.00925395	22201
F6VG99	Lmo7	LIM domain only 7 (Fragment) OS=Mus musculus OX=10090 GN=Lmo7 PE=1 SV=1	28	38	55	2	1604	181.8	6.62	114.24	84.3	83.4	83.9	115.1	117.1	116.2	0.722158	8.93201e-07	380928
P26040	Ezr	Ezrin OS=Mus musculus OX=10090 GN=Ezr PE=1 SV=3	44	35	85	23	586	69.4	6.1	126.69	102.1	105.3	102.5	95.2	94.9	100	1.06825	0.0269961	22350
A8DUK4	Hbb-bs	Beta-globin OS=Mus musculus OX=10090 GN=Hbb-bs PE=1 SV=1	63	9	207	1	147	15.7	7.69	396.06							#DIV/0!	#DIV/0!	100503605
G5E898	Ppl	Periplakin OS=Mus musculus OX=10090 GN=Ppl PE=1 SV=1	29	52	67	52	1754	203.7	5.48	111.15	87	88.5	89.5	112.1	111.7	111.3	0.790809	6.7485e-06	19041
G5E8R3	Pcx	Pyruvate carboxylase OS=Mus musculus OX=10090 GN=Pcx PE=1 SV=1	28	29	52	29	1178	129.6	6.71	102.63	105.1	106.4	103	94.1	97.4	94	1.10158	0.0029318	18563
A0A0A0MQF6	Gapdh	Glyceraldehyde-3-phosphate dehydrogenase OS=Mus musculus OX=10090 GN=Gapdh PE=1 SV=1	52	17	82	3	359	38.6	8.97	163.66	120.8	122.9	120.7	78.8	77.6	79.3	1.54603	1.04434e-06	14433
P42932	Cct8	T-complex protein 1 subunit theta OS=Mus musculus OX=10090 GN=Cct8 PE=1 SV=3	45	24	49	24	548	59.5	5.62	102.3	110.5	108.9	112.6	89.1	87.9	91	1.23881	0.000108401	12469
A0A0A0MQA5	Tuba4a	Tubulin alpha chain (Fragment) OS=Mus musculus OX=10090 GN=Tuba4a PE=1 SV=1	42	16	80	3	477	52.9	5.19	149.27	92.8	93.7	86.5	114.8	105.5	106.8	0.834607	0.0080859	22145
F6XCT0	Macf1	Microtubule-actin cross-linking factor 1 (Fragment) OS=Mus musculus OX=10090 GN=Macf1 PE=1 SV=1	24	38	54	30	1837	211.6	5.73	103.59	89.5	100.2	89.2	109.5	109.8	101.8	0.868577	0.0345155	11426
P10126	Eef1a1	Elongation factor 1-alpha 1 OS=Mus musculus OX=10090 GN=Eef1a1 PE=1 SV=3	56	21	91	10	462	50.1	9.01	196.98	106.7	105	105.5	93.8	96	93	1.12164	0.000369096	13627
O55143	Atp2a2	Sarcoplasmic/endoplasmic reticulum calcium ATPase 2 OS=Mus musculus OX=10090 GN=Atp2a2 PE=1 SV=2	31	33	53	18	1044	114.8	5.34	94.34	101	98.7	99	99.5	101.6	100.2	0.991371	0.413165	11938
P08249	Mdh2	Malate dehydrogenase, mitochondrial OS=Mus musculus OX=10090 GN=Mdh2 PE=1 SV=3	58	17	71	17	338	35.6	8.68	168.44	102.3	102.4	103.8	97.8	96.3	97.4	1.05832	0.00101075	17448
P11679	Krt8	Keratin, type II cytoskeletal 8 OS=Mus musculus OX=10090 GN=Krt8 PE=1 SV=4	48	29	61	21	490	54.5	5.82	120.75	90.4	89.3	90.1	111.9	107.1	111.2	0.817081	0.000193919	16691
Q9EQP2	Ehd4	EH domain-containing protein 4 OS=Mus musculus OX=10090 GN=Ehd4 PE=1 SV=1	58	29	71	23	541	61.4	6.76	126.57	80.7	77.8	80	122.2	118.1	121.2	0.659751	1.10025e-05	98878
Q8CGC7	Eprs	Bifunctional glutamate/proline--tRNA ligase OS=Mus musculus OX=10090 GN=Eprs PE=1 SV=4	24	30	43	29	1512	170	7.66	88.43	105.4	105.7	106.5	95.5	93.2	93.6	1.12504	0.000113529	107508
O35945	Aldh1a7	Aldehyde dehydrogenase, cytosolic 1 OS=Mus musculus OX=10090 GN=Aldh1a7 PE=1 SV=1	43	21	55	10	501	54.6	7.71	115.38	94.8	89.9	95.3	110	101.1	109	0.874727	0.0154719	26358
Q7M739	Tpr	Nuclear pore complex-associated intranuclear coiled-coil protein TPR OS=Mus musculus OX=10090 GN=Tpr PE=1 SV=1	20	43	50	43	2357	266.8	5.01	75.14	109.2	109.5	110.5	91.2	91.3	88.4	1.21521	4.62045e-05	108989
P08074	Cbr2	Carbonyl reductase [NADPH] 2 OS=Mus musculus OX=10090 GN=Cbr2 PE=1 SV=1	70	15	119	14	244	25.9	9.01	198.39	77.2	76.8	78.3	124.9	122.6	120.2	0.631765	5.9906e-06	12409
P26231	Ctnna1	Catenin alpha-1 OS=Mus musculus OX=10090 GN=Ctnna1 PE=1 SV=1	38	33	53	33	906	100	6.23	110.33	87	88.6	89	112.6	112.4	110.4	0.788909	1.43786e-05	12385
Q8VDJ3	Hdlbp	Vigilin OS=Mus musculus OX=10090 GN=Hdlbp PE=1 SV=1	25	34	53	34	1268	141.7	6.87	101.7	92.5	90.8	91.6	110.9	103.8	110.4	0.845586	0.00202339	110611
E9PVA8	Gcn1	eIF-2-alpha kinase activator GCN1 OS=Mus musculus OX=10090 GN=Gcn1 PE=1 SV=1	18	43	54	43	2671	292.8	7.36	75.59	99.4	99.5	101.7	102	97	100.4	1.00401	0.820829	231659
O08553	Dpysl2	Dihydropyrimidinase-related protein 2 OS=Mus musculus OX=10090 GN=Dpysl2 PE=1 SV=2	43	18	62	15	572	62.2	6.38	123.64	85.7	85.4	84.8	113.9	114.4	115.8	0.743679	1.2387e-06	12934
E9QNT8	Ank1	Ankyrin-1 OS=Mus musculus OX=10090 GN=Ank1 PE=1 SV=1	23	34	45	32	1862	204.1	6.55	80.97	79.8	84.2	82.5	119.1	116.8	117.5	0.69751	1.63011e-05	11733
P56480	Atp5f1b	ATP synthase subunit beta, mitochondrial OS=Mus musculus OX=10090 GN=Atp5f1b PE=1 SV=2	44	18	66	18	529	56.3	5.34	107.25	95.5	110.9	94.5	102.7	104	92.4	1.00602	0.930387	-
E9QN70	Lamb1	Laminin subunit beta-1 OS=Mus musculus OX=10090 GN=Lamb1 PE=1 SV=1	19	33	49	33	1834	202.3	5.01	91.07	91.9	91.1	93	108.8	108	107.2	0.851852	2.41141e-05	16777
P17182	Eno1	Alpha-enolase OS=Mus musculus OX=10090 GN=Eno1 PE=1 SV=3	46	20	63	17	434	47.1	6.8	111.39	130.7	124.8	126.8	72	73.1	72.5	1.75689	6.31297e-06	13806
P26043	Rdx	Radixin OS=Mus musculus OX=10090 GN=Rdx PE=1 SV=3	38	30	84	17	583	68.5	6.2	142.7	90.7	90.4	89.5	106.3	114.8	108.4	0.821244	0.00160411	19684
P09470	Ace	Angiotensin-converting enzyme OS=Mus musculus OX=10090 GN=Ace PE=1 SV=3	23	24	56	24	1312	150.8	6.55	103.58	83.3	81.5	82.8	119.1	116.8	116.5	0.702611	3.71076e-06	11421
Q9ET01	Pygl	Glycogen phosphorylase, liver form OS=Mus musculus OX=10090 GN=Pygl PE=1 SV=4	36	30	57	26	850	97.4	7.09	89.41	118.9	117.6	120.2	80.8	81.6	81	1.46549	1.13448e-06	110095
E9Q586	Dctn1	Dynactin subunit 1 OS=Mus musculus OX=10090 GN=Dctn1 PE=1 SV=1	34	30	42	30	1239	136.8	5.45	64.98	95.7	98.2	97.4	103.4	104.3	101	0.943635	0.00920711	13191
S4R1W1	Gm3839	Glyceraldehyde-3-phosphate dehydrogenase OS=Mus musculus OX=10090 GN=Gm3839 PE=1 SV=1	53	15	75	1	333	35.8	8.03	151.27	94.5	95.6	94.1	106.8	99	110	0.899937	0.033073	-
Q60710	Samhd1	Deoxynucleoside triphosphate triphosphohydrolase SAMHD1 OS=Mus musculus OX=10090 GN=Samhd1 PE=1 SV=3	40	23	52	2	658	75.8	7.93	88.54	119.6	117.7	117.3	80.4	82.9	82.1	1.44499	3.72459e-06	56045
Q61316	Hspa4	Heat shock 70 kDa protein 4 OS=Mus musculus OX=10090 GN=Hspa4 PE=1 SV=1	42	34	47	32	841	94.1	5.24	85.14	109.2	107.5	107	92.8	90.9	92.6	1.17155	6.13215e-05	15525
O70318	Epb41l2	Band 4.1-like protein 2 OS=Mus musculus OX=10090 GN=Epb41l2 PE=1 SV=2	34	31	49	23	988	109.9	5.43	94.13	88.3	87.5	86.1	113.3	111.7	113.2	0.774394	6.60589e-06	13822
Q8BL66	Eea1	Early endosome antigen 1 OS=Mus musculus OX=10090 GN=Eea1 PE=1 SV=2	27	39	46	39	1411	160.8	5.77	86.16	103.7	106.5	104.5	94.6	96.6	94.1	1.10305	0.000972439	216238
Q8CIE6	Copa	Coatomer subunit alpha OS=Mus musculus OX=10090 GN=Copa PE=1 SV=2	26	31	49	31	1224	138.3	7.65	95.61	117.1	113.8	113.2	85.9	84.2	85.7	1.34519	2.43708e-05	12847
Q8BMK4	Ckap4	Cytoskeleton-associated protein 4 OS=Mus musculus OX=10090 GN=Ckap4 PE=1 SV=2	49	28	49	28	575	63.7	5.64	93.69	135	132.8	131.3	64.1	67.9	68.8	1.98755	3.26073e-06	216197
Q8CI94	Pygb	Glycogen phosphorylase, brain form OS=Mus musculus OX=10090 GN=Pygb PE=1 SV=3	33	24	41	18	843	96.7	6.73	95.18	104.7	103.4	109.1	94.2	93.3	95.3	1.12164	0.00323746	110078
Q9Z1Q9	Vars	Valine--tRNA ligase OS=Mus musculus OX=10090 GN=Vars PE=1 SV=1	25	27	48	27	1263	140.1	7.77	83.51	113.2	113.4	112.8	85.4	87.1	88	1.30288	4.67292e-06	22321
F6TVP2	Samhd1	Deoxynucleoside triphosphate triphosphohydrolase SAMHD1 (Fragment) OS=Mus musculus OX=10090 GN=Samhd1 PE=1 SV=1	42	22	50	1	631	72.8	7.27	86.24							#DIV/0!	#DIV/0!	56045
Q99KI0	Aco2	Aconitate hydratase, mitochondrial OS=Mus musculus OX=10090 GN=Aco2 PE=1 SV=1	36	27	50	27	780	85.4	7.93	86.61	102	100.6	102.4	97.1	101.3	96.6	1.0339	0.103622	11429
G3X8Q5	Cp	Ceruloplasmin OS=Mus musculus OX=10090 GN=Cp PE=1 SV=1	29	27	48	1	1085	124.1	5.88	95.29	91.9	90.4	90.1	109	109.9	108.7	0.831502	1.00469e-05	12870
P23116	Eif3a	Eukaryotic translation initiation factor 3 subunit A OS=Mus musculus OX=10090 GN=Eif3a PE=1 SV=5	29	40	51	40	1344	161.8	6.77	92.17	104.2	106	105.6	93.9	96.6	93.7	1.11119	0.000625059	13669
P97434	Mprip	Myosin phosphatase Rho-interacting protein OS=Mus musculus OX=10090 GN=Mprip PE=1 SV=2	35	29	41	2	1024	116.3	6.21	82.86	88.1	92.1	87.7	121.4	107	103.7	0.806685	0.0188959	26936
Q8VHX6	Flnc	Filamin-C OS=Mus musculus OX=10090 GN=Flnc PE=1 SV=3	14	33	45	19	2726	290.9	5.95	86.52	82.6	82.9	85.1	117.5	113.8	118.1	0.71723	2.96461e-05	68794
P09405	Ncl	Nucleolin OS=Mus musculus OX=10090 GN=Ncl PE=1 SV=2	40	34	57	34	707	76.7	4.75	94.31	108.9	106.9	104.6	93.1	94	92.5	1.14592	0.000495567	17975
Q9DCV7	Krt7	Keratin, type II cytoskeletal 7 OS=Mus musculus OX=10090 GN=Krt7 PE=1 SV=1	44	24	51	18	457	50.7	5.87	112.69	95	92.1	92.3	108.2	104.4	108	0.871491	0.000893534	110310
E9PZD8	Cp	Ceruloplasmin OS=Mus musculus OX=10090 GN=Cp PE=1 SV=1	29	27	49	1	1086	124.1	5.88	98.39	92.6	94	81.1	107.7	114.8	109.8	0.805597	0.00942059	12870
Q9EQK5	Mvp	Major vault protein OS=Mus musculus OX=10090 GN=Mvp PE=1 SV=4	39	30	49	30	861	95.9	5.59	99.02	107.7	108.1	108.8	93.4	90	92	1.17865	9.36346e-05	78388
P09411	Pgk1	Phosphoglycerate kinase 1 OS=Mus musculus OX=10090 GN=Pgk1 PE=1 SV=4	64	25	52	25	417	44.5	7.9	95.73	119.2	116.1	116.3	82.6	82.2	83.6	1.41546	5.8932e-06	18655
Q3UH68	Limch1	LIM and calponin homology domains-containing protein 1 OS=Mus musculus OX=10090 GN=Limch1 PE=1 SV=2	31	28	44	1	1057	118.1	5.48	80.41	95.8	103.4	104.2	94.8	111.4	90.5	1.02258	0.762779	77569
P21981	Tgm2	Protein-glutamine gamma-glutamyltransferase 2 OS=Mus musculus OX=10090 GN=Tgm2 PE=1 SV=4	37	25	51	25	686	77	5.1	102.95	93.6	93	93.3	108.4	104.3	107.4	0.874414	0.000424249	21817
P10493	Nid1	Nidogen-1 OS=Mus musculus OX=10090 GN=Nid1 PE=1 SV=2	27	28	50	27	1245	136.5	5.44	96.47	71.5	72.6	71.8	128.7	126	129.5	0.561947	9.12421e-07	18073
P68372	Tubb4b	Tubulin beta-4B chain OS=Mus musculus OX=10090 GN=Tubb4b PE=1 SV=1	52	17	92	3	445	49.8	4.89	148.07	98	101.1	102.7	101.5	96	100.7	1.01207	0.614667	227613
A6ZI44	Aldoa	Fructose-bisphosphate aldolase OS=Mus musculus OX=10090 GN=Aldoa PE=1 SV=1	44	21	57	17	418	45.1	7.91	132.92	111	111.1	109.2	86.4	94.2	88.1	1.23297	0.00103806	11674
Q99K94	Stat1	Signal transducer and activator of transcription OS=Mus musculus OX=10090 GN=Stat1 PE=1 SV=1	38	26	48	26	712	83.1	6.02	98.85	137	134.1	136.4	63	64.6	64.9	2.11688	2.89433e-07	20846
Q5SWZ5	Mprip	Myosin phosphatase Rho-interacting protein OS=Mus musculus OX=10090 GN=Mprip PE=1 SV=1	17	31	40	4	2269	257.1	5.59	73.58	83.8	85.3	85	116.5	114.1	115.3	0.734605	3.24215e-06	26936
Q922J3	Clip1	CAP-Gly domain-containing linker protein 1 OS=Mus musculus OX=10090 GN=Clip1 PE=1 SV=1	28	36	46	31	1391	155.7	5.24	83.24	92.8	95.1	96.7	106.6	103.6	105.4	0.901774	0.00193869	56430
Q61598	Gdi2	Rab GDP dissociation inhibitor beta OS=Mus musculus OX=10090 GN=Gdi2 PE=1 SV=1	57	25	43	21	445	50.5	6.25	83.77	112.4	109.2	110.6	90	87.6	90.2	1.24048	6.68579e-05	14569
Q91V92	Acly	ATP-citrate synthase OS=Mus musculus OX=10090 GN=Acly PE=1 SV=1	35	33	45	33	1091	119.7	7.44	80.35	104.4	103.4	102.7	96.5	99.2	93.9	1.07217	0.0123155	104112
P46735	Myo1b	Unconventional myosin-Ib OS=Mus musculus OX=10090 GN=Myo1b PE=1 SV=3	33	36	48	35	1107	128.5	9.26	84.21	88.7	87.2	87.5	113	110.4	113.3	0.782299	1.86164e-05	17912
P28665	Mug1	Murinoglobulin-1 OS=Mus musculus OX=10090 GN=Mug1 PE=1 SV=3	20	25	45	25	1476	165.2	6.42	84.91	90.1	88.1	89.6	112.3	107.9	111.9	0.806384	0.000149826	17836
Q9JI91	Actn2	Alpha-actinin-2 OS=Mus musculus OX=10090 GN=Actn2 PE=1 SV=2	32	25	38	14	894	103.8	5.45	83.47	72.5	71.6	77.3	129.8	124.9	123.9	0.584786	3.26302e-05	11472
Q8CIZ8	Vwf	von Willebrand factor OS=Mus musculus OX=10090 GN=Vwf PE=1 SV=2	15	35	41	35	2813	309.1	5.5	67.02	86.2	90.4	87.5	112.9	108.7	114.2	0.78648	0.000322948	22371
D3YU22	Limch1	LIM and calponin homology domains-containing protein 1 OS=Mus musculus OX=10090 GN=Limch1 PE=1 SV=1	31	28	41	1	1068	119.5	5.63	75.49	82.3	84.4	83.3	118.2	114.9	116.9	0.714286	8.01154e-06	77569
Q9WVK4	Ehd1	EH domain-containing protein 1 OS=Mus musculus OX=10090 GN=Ehd1 PE=1 SV=1	40	24	58	17	534	60.6	6.83	92.62	89.6	88.6	88.3	110.1	113	110.4	0.7991	2.3904e-05	13660
P38647	Hspa9	Stress-70 protein, mitochondrial OS=Mus musculus OX=10090 GN=Hspa9 PE=1 SV=3	33	25	38	25	679	73.4	6.07	73.66	104.7	101.4	104.3	98.1	93.8	97.7	1.07182	0.0157543	15526
P20918	Plg	Plasminogen OS=Mus musculus OX=10090 GN=Plg PE=1 SV=3	43	29	43	29	812	90.7	6.6	80.29	83.3	83.7	83.2	115.1	115.4	119.3	0.715266	1.67746e-05	18815
Q03265	Atp5f1a	ATP synthase subunit alpha, mitochondrial OS=Mus musculus OX=10090 GN=Atp5f1a PE=1 SV=1	41	25	48	25	553	59.7	9.19	94.76	102	101.4	102.2	99.2	95.2	100.1	1.03769	0.0722719	-
Q9JIF7	Copb1	Coatomer subunit beta OS=Mus musculus OX=10090 GN=Copb1 PE=1 SV=1	27	22	34	22	953	107	6	77.46	112.8	110.7	110.8	89	87	89.7	1.25819	2.72464e-05	70349
A0A0A6YWR2	Ighg1	Ig gamma-1 chain C region secreted form (Fragment) OS=Mus musculus OX=10090 GN=Ighg1 PE=1 SV=1	32	8	99	1	393	43.4	6.44	247.95	125.3	120.5	123.5	75.8	76.9	78	1.60078	7.30187e-06	-
P06728	Apoa4	Apolipoprotein A-IV OS=Mus musculus OX=10090 GN=Apoa4 PE=1 SV=3	56	17	37	17	395	45	5.47	78.08	100.7	101	105	98.9	95.4	99	1.04569	0.0704012	11808
P99024	Tubb5	Tubulin beta-5 chain OS=Mus musculus OX=10090 GN=Tubb5 PE=1 SV=1	46	16	80	2	444	49.6	4.89	133.1	105.3	103.5	103.7	97.6	94.5	95.4	1.08696	0.00153299	22154
P01878		Ig alpha chain C region OS=Mus musculus OX=10090 PE=1 SV=1	44	12	99	12	344	36.9	5.06	284.73	150.9	148.6	149	49.5	50.7	51.3	2.9604	3.83065e-08	#N/A
P06909	Cfh	Complement factor H OS=Mus musculus OX=10090 GN=Cfh PE=1 SV=2	27	26	40	25	1234	139	6.99	74.42	76.9	75.1	77.5	128.5	117.2	124.9	0.619266	0.000160123	12628
H3BIV5	Akap5	A-kinase anchor protein 5 OS=Mus musculus OX=10090 GN=Akap5 PE=1 SV=1	41	19	32	19	752	80.2	4.77	68.65	85.8	84.7	84.2	114	115.6	115.7	0.737619	1.99308e-06	238276
P24527	Lta4h	Leukotriene A-4 hydrolase OS=Mus musculus OX=10090 GN=Lta4h PE=1 SV=4	40	22	45	22	611	69	6.42	81.09	116	115.4	114.1	84.1	84.8	85.6	1.35756	1.78108e-06	16993
A0A1B0GSG5	Rnh1	Ribonuclease inhibitor OS=Mus musculus OX=10090 GN=Rnh1 PE=1 SV=1	45	16	36	16	492	53.9	5.01	90.82	107.8	108.3	106	94.2	91.5	92.2	1.15905	0.000160459	107702
P12970	Rpl7a	60S ribosomal protein L7a OS=Mus musculus OX=10090 GN=Rpl7a PE=1 SV=2	48	19	40	19	266	30	10.56	97.99	104.6	101.6	102.1	98	95.6	98.1	1.05691	0.0110317	27176
Q542I8	Itgb2	Integrin beta OS=Mus musculus OX=10090 GN=Itgb2 PE=1 SV=1	41	25	46	24	770	84.8	7.05	87.91	131.1	129.3	130.8	63.6	81.7	63.4	1.87446	0.000565266	16414
P54071	Idh2	Isocitrate dehydrogenase [NADP], mitochondrial OS=Mus musculus OX=10090 GN=Idh2 PE=1 SV=3	43	19	45	19	452	50.9	8.69	94.24	92.7	91.9	90.6	108.1	109.8	106.9	0.847291	9.16148e-05	269951
P31001	Des	Desmin OS=Mus musculus OX=10090 GN=Des PE=1 SV=3	43	23	49	18	469	53.5	5.27	98.92	86.7	86.5	94.2	112.5	111.7	108.3	0.804211	0.0015809	13346
Q91X72	Hpx	Hemopexin OS=Mus musculus OX=10090 GN=Hpx PE=1 SV=2	36	20	74	20	460	51.3	7.8	135.43	82	82.6	82.3	118.3	119.9	114.8	0.699433	2.00028e-05	15458
Q6P5E4	Uggt1	UDP-glucose:glycoprotein glucosyltransferase 1 OS=Mus musculus OX=10090 GN=Uggt1 PE=1 SV=4	19	28	44	28	1551	176.3	5.62	77.16	109.3	111.9	109.4	90.3	89.6	89.5	1.22717	2.11719e-05	320011
Q9JKR6	Hyou1	Hypoxia up-regulated protein 1 OS=Mus musculus OX=10090 GN=Hyou1 PE=1 SV=1	28	26	43	26	999	111.1	5.19	82.78	112.8	109.5	109.9	89.8	89.3	88.6	1.24094	3.98909e-05	12282
Q99JY9	Actr3	Actin-related protein 3 OS=Mus musculus OX=10090 GN=Actr3 PE=1 SV=3	46	19	41	19	418	47.3	5.88	87.48	112.8	111.4	111.8	88.4	87.2	88.4	1.27273	2.00166e-06	74117
Q78PY7	Snd1	Staphylococcal nuclease domain-containing protein 1 OS=Mus musculus OX=10090 GN=Snd1 PE=1 SV=1	36	28	43	28	910	102	7.43	81.18	98.6	99.6	97.2	102.1	100.4	102.1	0.969796	0.0268591	56463
P63101	Ywhaz	14-3-3 protein zeta/delta OS=Mus musculus OX=10090 GN=Ywhaz PE=1 SV=1	44	13	54	8	245	27.8	4.79	115.11	101.3	100.5	102.4	100	91.8	104.1	1.02805	0.491502	22631
P62259	Ywhae	14-3-3 protein epsilon OS=Mus musculus OX=10090 GN=Ywhae PE=1 SV=1	61	18	55	15	255	29.2	4.74	117.2	101.6	98.3	103	99.7	97.8	99.5	1.01987	0.264844	22627
P01865	Igh-1a	Ig gamma-2A chain C region, membrane-bound form OS=Mus musculus OX=10090 GN=Igh-1a PE=1 SV=3	31	10	61	10	398	43.9	6.29	103.13	116.3	113.8	114.7	81.8	89	84.3	1.35163	0.000180089	-
E9PV24	Fga	Fibrinogen alpha chain OS=Mus musculus OX=10090 GN=Fga PE=1 SV=1	25	19	51	19	789	87.4	6.11	116.62	72.3	72	72.8	131.2	124.2	127.4	0.567137	1.09913e-05	14161
P11247	Mpo	Myeloperoxidase OS=Mus musculus OX=10090 GN=Mpo PE=1 SV=2	30	23	47	20	718	81.1	9.55	83.7	135.5	134	136.2	65.4	62.4	66.5	2.08801	8.96816e-07	17523
P26443	Glud1	Glutamate dehydrogenase 1, mitochondrial OS=Mus musculus OX=10090 GN=Glud1 PE=1 SV=1	31	19	45	19	558	61.3	8	85.13	96	95.6	97.7	104.7	100.4	105.6	0.931123	0.0145402	14661
Q8VEK3	Hnrnpu	Heterogeneous nuclear ribonucleoprotein U OS=Mus musculus OX=10090 GN=Hnrnpu PE=1 SV=1	30	22	50	22	800	87.9	6.24	67.03	103.1	103.2	102.6	98.4	95.2	97.5	1.06115	0.00362652	51810
Q00519	Xdh	Xanthine dehydrogenase/oxidase OS=Mus musculus OX=10090 GN=Xdh PE=1 SV=5	24	27	44	26	1335	146.5	7.56	69.3	102.9	102.4	101.8	97.9	99.6	95.3	1.04884	0.0209322	22436
B2RS76	Cpb1	Carboxypeptidase B1 (Tissue), isoform CRA_b OS=Mus musculus OX=10090 GN=Cpb1 PE=1 SV=1	52	18	43	18	415	47.5	5.36	80.64	32.3	33.6	33.6	165.2	173	162.4	0.198761	1.96354e-06	76703
Q60864	Stip1	Stress-induced-phosphoprotein 1 OS=Mus musculus OX=10090 GN=Stip1 PE=1 SV=1	49	30	45	30	543	62.5	6.8	64.96	107.9	106.8	105.8	91.3	95.6	92.6	1.14669	0.000634605	20867
P00688	Amy2	Pancreatic alpha-amylase OS=Mus musculus OX=10090 GN=Amy2 PE=1 SV=2	50	18	66	12	508	57.3	7.28	139.63	35.3	37.1	38.1	170.8	149.7	169	0.225741	4.94876e-05	-
Q3U0V1	Khsrp	Far upstream element-binding protein 2 OS=Mus musculus OX=10090 GN=Khsrp PE=1 SV=2	40	28	39	24	748	76.7	7.33	91.95	104	108.3	105.1	92.4	98.8	91.3	1.12354	0.0120964	16549
Q9JJZ2	Tuba8	Tubulin alpha-8 chain OS=Mus musculus OX=10090 GN=Tuba8 PE=1 SV=1	35	12	56	3	449	50	5.1	94.94	89.6	87.9	93.2	114.2	105.6	109.6	0.821797	0.00263055	53857
P80318	Cct3	T-complex protein 1 subunit gamma OS=Mus musculus OX=10090 GN=Cct3 PE=1 SV=1	45	21	43	21	545	60.6	6.7	86.35	109.4	109.1	108.4	87.8	94.6	90.8	1.19656	0.000845149	12462
O35639	Anxa3	Annexin A3 OS=Mus musculus OX=10090 GN=Anxa3 PE=1 SV=4	53	20	50	19	323	36.4	5.76	114.01	102.9	100.3	101.7	99.3	97.4	98.4	1.03321	0.0246448	11745
P09055	Itgb1	Integrin beta-1 OS=Mus musculus OX=10090 GN=Itgb1 PE=1 SV=1	23	18	46	18	798	88.2	5.94	88.61	89.9	89	87.1	111.5	112.1	110.5	0.796169	1.80479e-05	16412
A0A1C7CYV0	Pls3	Plastin-3 (Fragment) OS=Mus musculus OX=10090 GN=Pls3 PE=1 SV=1	37	21	51	14	629	70.6	5.62	81.29	94.9	90.9	93.7	109.2	101.9	109.5	0.871803	0.00761662	102866
Q9WU78	Pdcd6ip	Programmed cell death 6-interacting protein OS=Mus musculus OX=10090 GN=Pdcd6ip PE=1 SV=3	28	25	43	25	869	96	6.52	75.33	106.9	108.4	104.4	94.5	96.6	89.2	1.14056	0.00620921	18571
Q6ZQ38	Cand1	Cullin-associated NEDD8-dissociated protein 1 OS=Mus musculus OX=10090 GN=Cand1 PE=1 SV=2	26	30	42	30	1230	136.2	5.78	64.63	105.7	104.6	105	96.9	92.6	95.2	1.10748	0.00138814	71902
F8WID5	Tpm1	Tropomyosin alpha-1 chain OS=Mus musculus OX=10090 GN=Tpm1 PE=1 SV=1	51	21	46	0	326	37.4	4.72	72.01	85.8	83.8	84.7	115.1	116.7	113.8	0.735822	7.47695e-06	22003
D3Z6P0	Pdia2	Protein disulfide-isomerase A2 OS=Mus musculus OX=10090 GN=Pdia2 PE=1 SV=1	37	20	37	20	527	58.3	4.96	76.01	24.9	25.7	26	175.6	173.8	174.1	0.146323	2.12633e-09	69191
E9QNN1	Dhx9	ATP-dependent RNA helicase A OS=Mus musculus OX=10090 GN=Dhx9 PE=1 SV=1	20	25	38	25	1384	149.6	6.83	86.75	104.7	106.9	108.7	93.6	89.9	96.2	1.14516	0.0033285	13211
P43277	Hist1h1d	Histone H1.3 OS=Mus musculus OX=10090 GN=Hist1h1d PE=1 SV=2	47	17	83	1	221	22.1	11.03	162.58	115.9	112.1	113.9	85.6	85.6	87	1.32417	1.97878e-05	-
Q5SQ27	Sec14l3	MCG140354 OS=Mus musculus OX=10090 GN=Sec14l3 PE=1 SV=1	47	15	51	13	401	46.1	5.92	128.7	82.9	82.7	82.2	116.1	120.9	115.2	0.703578	4.04871e-05	380683
P27546	Map4	Microtubule-associated protein 4 OS=Mus musculus OX=10090 GN=Map4 PE=1 SV=3	29	27	43	17	1125	117.4	4.98	58.72	85.1	85.8	82.5	116.3	113.7	116.6	0.731102	2.18965e-05	17758
Q9CW03	Smc3	Structural maintenance of chromosomes protein 3 OS=Mus musculus OX=10090 GN=Smc3 PE=1 SV=2	27	31	37	31	1217	141.5	7.18	68.44	105.9	105.2	103.9	97.2	94.1	93.7	1.10526	0.00133062	13006
Q9QUR6	Prep	Prolyl endopeptidase OS=Mus musculus OX=10090 GN=Prep PE=1 SV=1	43	27	43	27	710	80.7	5.73	79.09	99.7	101.1	101.4	97.8	102	98	1.01478	0.373346	19072
P15864	Hist1h1c	Histone H1.2 OS=Mus musculus OX=10090 GN=Hist1h1c PE=1 SV=2	46	16	77	5	212	21.3	11	145.21	117.2	112.8	111.5	83.5	87.9	87.1	1.32108	0.000226908	-
P29341	Pabpc1	Polyadenylate-binding protein 1 OS=Mus musculus OX=10090 GN=Pabpc1 PE=1 SV=2	26	18	36	14	636	70.6	9.5	76.58	114.4	114.4	123	83	82.1	83.2	1.41683	0.000280799	18458
Q91VD9	Ndufs1	NADH-ubiquinone oxidoreductase 75 kDa subunit, mitochondrial OS=Mus musculus OX=10090 GN=Ndufs1 PE=1 SV=2	32	18	30	18	727	79.7	5.72	72.54	101.5	101.7	99.2	99.5	99.8	98.4	1.01579	0.159534	227197
B1ATS5	Atp2a3	Calcium-transporting ATPase OS=Mus musculus OX=10090 GN=Atp2a3 PE=1 SV=1	25	24	36	15	1020	111.6	6	71.85	104.7	106.3	104.1	96.2	95.3	93.4	1.106	0.000672767	53313
P10107	Anxa1	Annexin A1 OS=Mus musculus OX=10090 GN=Anxa1 PE=1 SV=2	54	19	47	18	346	38.7	7.37	99.52	127	126.8	123.7	72.5	77.3	72.7	1.69663	1.08082e-05	16952
D3Z2H9	Tpm3-rs7	Uncharacterized protein OS=Mus musculus OX=10090 GN=Tpm3-rs7 PE=3 SV=1	55	19	47	8	248	29	4.81	91.77	110.3	106.2	108.1	90.6	92.4	92.5	1.17822	0.000254842	-
Q922D8	Mthfd1	C-1-tetrahydrofolate synthase, cytoplasmic OS=Mus musculus OX=10090 GN=Mthfd1 PE=1 SV=4	29	26	39	25	935	101.1	7.14	77.21	100.3	101.6	102.1	98.1	99.4	98.5	1.02703	0.0155961	108156
Q8BG05	Hnrnpa3	Heterogeneous nuclear ribonucleoprotein A3 OS=Mus musculus OX=10090 GN=Hnrnpa3 PE=1 SV=1	41	18	42	13	379	39.6	9.01	74.34	105.4	105.3	104.7	91.5	100	93.1	1.10822	0.017204	229279
P35564	Canx	Calnexin OS=Mus musculus OX=10090 GN=Canx PE=1 SV=1	39	22	41	22	591	67.2	4.64	72.07	116.4	108.5	112	85.3	89.6	88.2	1.2805	0.000709338	12330
D3YYN7	Atp1a2	Sodium/potassium-transporting ATPase subunit alpha OS=Mus musculus OX=10090 GN=Atp1a2 PE=1 SV=1	21	17	34	4	947	103.5	5.44	62.98	94.4	87.8	87.3	109.7	106.9	113.8	0.815678	0.00261822	98660
P43274	Hist1h1e	Histone H1.4 OS=Mus musculus OX=10090 GN=Hist1h1e PE=1 SV=2	44	16	77	5	219	22	11.11	157.94	101.3	97.3	97.7	102.7	97.6	103.3	0.975955	0.332835	-
Q6ZWQ0	Syne2	Nesprin-2 OS=Mus musculus OX=10090 GN=Syne2 PE=1 SV=2	6	38	43	37	6874	782.2	5.33	54.43	97.8	101.5	101.8	100.5	100.1	98.3	1.00736	0.640381	319565
P16406	Enpep	Glutamyl aminopeptidase OS=Mus musculus OX=10090 GN=Enpep PE=1 SV=1	30	28	40	28	945	107.9	5.44	78.61	81.7	82.1	84.5	118.3	114.8	118.7	0.705799	2.20973e-05	13809
A0A1L1STC6	Syne1	Nesprin-1 OS=Mus musculus OX=10090 GN=Syne1 PE=1 SV=1	5	43	48	42	8799	1009.3	5.58	39.64	104.5	106.7	107.2	93.4	92.4	95.8	1.13068	0.000715899	64009
Q61646	Hp	Haptoglobin OS=Mus musculus OX=10090 GN=Hp PE=1 SV=1	42	14	46	14	347	38.7	6.29	94.15	76	75.6	74.7	127.1	122.3	124.2	0.605728	4.50724e-06	15439
P68254	Ywhaq	14-3-3 protein theta OS=Mus musculus OX=10090 GN=Ywhaq PE=1 SV=1	44	14	44	8	245	27.8	4.78	100.48	103.6	100.3	104.5	96.1	97.2	98.4	1.05725	0.0180231	22630
Q61656	Ddx5	Probable ATP-dependent RNA helicase DDX5 OS=Mus musculus OX=10090 GN=Ddx5 PE=1 SV=2	37	21	44	16	614	69.2	8.92	83.28	111.4	111.8	112.3	86.5	90.3	87.7	1.26843	3.30809e-05	13207
P37040	Por	NADPH--cytochrome P450 reductase OS=Mus musculus OX=10090 GN=Por PE=1 SV=2	34	23	39	23	678	77	5.53	80.51	96	98.4	95.1	107.2	103.8	99.5	0.932367	0.0452973	18984
Q62009	Postn	Periostin OS=Mus musculus OX=10090 GN=Postn PE=1 SV=2	28	21	39	18	838	93.1	7.53	77.89	98.5	95	97.9	101.5	104.9	102.2	0.944264	0.0186365	50706
P63038	Hspd1	60 kDa heat shock protein, mitochondrial OS=Mus musculus OX=10090 GN=Hspd1 PE=1 SV=1	37	17	35	17	573	60.9	6.18	67.86	99.5	96.4	98.3	105.7	94.5	105.6	0.962067	0.369224	15510
Q9Z0U1	Tjp2	Tight junction protein ZO-2 OS=Mus musculus OX=10090 GN=Tjp2 PE=1 SV=2	23	24	38	24	1167	131.2	6.79	80.48	88.1	90.8	90.3	110.7	109.7	110.4	0.813785	2.00554e-05	21873
Q8VDM4	Psmd2	26S proteasome non-ATPase regulatory subunit 2 OS=Mus musculus OX=10090 GN=Psmd2 PE=1 SV=1	28	22	33	22	908	100.1	5.17	64.12	111.9	109.9	110.6	90.9	88.2	88.6	1.24169	3.01857e-05	21762
Q9EP71	Rai14	Ankycorbin OS=Mus musculus OX=10090 GN=Rai14 PE=1 SV=1	27	24	34	24	979	108.8	6.27	55.56	94.1	90.8	90.2	106.9	108.4	109.6	0.846722	0.000325313	75646
E9Q9C3	Afdn	Afadin OS=Mus musculus OX=10090 GN=Afdn PE=1 SV=1	20	30	38	30	1827	207.2	6.23	59.75	87.6	91.3	89.6	110.8	109.3	111.5	0.80971	7.32942e-05	17356
P60843	Eif4a1	Eukaryotic initiation factor 4A-I OS=Mus musculus OX=10090 GN=Eif4a1 PE=1 SV=1	41	17	29	9	406	46.1	5.48	59.86	111.3	111.1	110.8	87.5	91.3	88	1.24888	5.09979e-05	13681
Q9DBG3	Ap2b1	AP-2 complex subunit beta OS=Mus musculus OX=10090 GN=Ap2b1 PE=1 SV=1	25	24	41	11	937	104.5	5.38	70.13	102.6	102.2	104	98	98.4	94.8	1.06044	0.00970155	71770
Q7TPZ8	Cpa1	Carboxypeptidase A1 OS=Mus musculus OX=10090 GN=Cpa1 PE=1 SV=1	43	13	51	13	419	47.4	5.67	96.27	31.7	31.1	31.4	164.5	178	163.3	0.18624	8.30982e-06	109697
P19001	Krt19	Keratin, type I cytoskeletal 19 OS=Mus musculus OX=10090 GN=Krt19 PE=1 SV=1	64	26	51	20	403	44.5	5.39	101.66	89.3	90.5	91.1	110.1	109.3	109.7	0.823154	4.67888e-06	16669
E9QA15	Cald1	Caldesmon 1 OS=Mus musculus OX=10090 GN=Cald1 PE=1 SV=1	25	19	35	1	768	89.2	5.5	64.33	91.3	89.6	89.8	109.7	113.5	106.1	0.822047	0.000893256	109624
Q5SVG5	Ap1b1	AP complex subunit beta OS=Mus musculus OX=10090 GN=Ap1b1 PE=1 SV=1	24	23	37	10	916	101.1	5.22	64.09	110.8	109.3	109.5	88.9	90.9	90.6	1.21893	1.45182e-05	11764
A0A0G2JGX4	Atp1a3	Sodium/potassium-transporting ATPase subunit alpha OS=Mus musculus OX=10090 GN=Atp1a3 PE=1 SV=1	18	15	32	2	1026	112.9	5.41	56.91	115.7	111.1	106.1	84.9	93.5	88.7	1.24635	0.0041593	232975
Q9D0E1	Hnrnpm	Heterogeneous nuclear ribonucleoprotein M OS=Mus musculus OX=10090 GN=Hnrnpm PE=1 SV=3	39	27	39	26	729	77.6	8.63	75.92	99.2	98.4	101.6	103	97.2	100.6	0.994681	0.796787	76936
P18760	Cfl1	Cofilin-1 OS=Mus musculus OX=10090 GN=Cfl1 PE=1 SV=3	66	17	45	15	166	18.5	8.09	87.71	123.9	117.9	118.5	80.9	79	79.8	1.50313	3.51513e-05	12631
P07759	Serpina3k	Serine protease inhibitor A3K OS=Mus musculus OX=10090 GN=Serpina3k PE=1 SV=2	39	16	34	12	418	46.9	5.16	67.32	85.8	84.7	83.3	114.2	118.7	113.3	0.733102	7.15209e-05	20714
P01869	Ighg1	Ig gamma-1 chain C region, membrane-bound form OS=Mus musculus OX=10090 GN=Ighg1 PE=1 SV=2	33	8	89	1	393	43.4	6.44	227.05							#DIV/0!	#DIV/0!	-
Q9Z1Z0	Uso1	General vesicular transport factor p115 OS=Mus musculus OX=10090 GN=Uso1 PE=1 SV=2	24	20	29	20	959	106.9	4.93	62.88	108.8	104.5	107.2	92.8	90.8	95.9	1.14669	0.00215323	56041
Q61696	Hspa1a	Heat shock 70 kDa protein 1A OS=Mus musculus OX=10090 GN=Hspa1a PE=1 SV=2	36	22	44	8	641	70	5.72	94.38	98.1	98.5	97.7	101.3	100.7	103.7	0.962709	0.0158582	193740
P01872	Ighm	Immunoglobulin heavy constant mu OS=Mus musculus OX=10090 GN=Ighm PE=1 SV=2	36	17	36	17	454	49.9	7.01	76.37	117.4	116	118.1	82.6	82.7	83.3	1.41392	7.95444e-07	-
P13020	Gsn	Gelsolin OS=Mus musculus OX=10090 GN=Gsn PE=1 SV=3	36	23	39	23	780	85.9	6.18	79.54	95.7	97.2	97.2	104	102.4	103.4	0.936411	0.000657775	227753
A2AN08	Ubr4	E3 ubiquitin-protein ligase UBR4 OS=Mus musculus OX=10090 GN=Ubr4 PE=1 SV=1	7	33	38	33	5180	571.9	6.06	53.37	100.8	105.8	105.6	96.8	95.3	95.7	1.08478	0.00865386	69116
Q8VCQ8	Cald1	Caldesmon 1 OS=Mus musculus OX=10090 GN=Cald1 PE=1 SV=1	36	18	34	1	530	60.4	7.37	64.33	84.9	80.6	84.2	124.1	105.1	121.1	0.712818	0.00516852	109624
Q61087	Lamb3	Laminin subunit beta-3 OS=Mus musculus OX=10090 GN=Lamb3 PE=1 SV=2	26	27	33	27	1168	128.8	7.47	56.6	84.3	84.8	85.8	117.3	112.7	115.1	0.738626	2.77704e-05	16780
Q7TMM9	Tubb2a	Tubulin beta-2A chain OS=Mus musculus OX=10090 GN=Tubb2a PE=1 SV=1	35	14	72	1	445	49.9	4.89	115.38	91.8	91.9	89.1	112.6	97.5	117.1	0.833741	0.0390384	22151
O55029	Copb2	Coatomer subunit beta' OS=Mus musculus OX=10090 GN=Copb2 PE=1 SV=2	28	22	37	22	905	102.4	5.3	66.42	113.4	113.1	109.3	86	90.4	87.7	1.27149	0.000202308	50797
G3UVV4	Hk1	Hexokinase 1, isoform CRA_f OS=Mus musculus OX=10090 GN=Hk1 PE=1 SV=1	29	24	31	21	917	101.8	6.67	64.62	111.5	109.1	112.5	90.7	86	90.3	1.24757	0.000262152	15275
Q04857	Col6a1	Collagen alpha-1(VI) chain OS=Mus musculus OX=10090 GN=Col6a1 PE=1 SV=1	23	20	35	20	1025	108.4	5.36	71.73	88.6	88.5	86.9	110.9	113.5	111.7	0.785481	1.42407e-05	12833
P62962	Pfn1	Profilin-1 OS=Mus musculus OX=10090 GN=Pfn1 PE=1 SV=2	64	10	47	10	140	14.9	8.28	96.69	124.2	120.6	122.8	77.1	76.6	78.7	1.58176	3.25188e-06	18643
Q8CAQ8	Immt	MICOS complex subunit Mic60 OS=Mus musculus OX=10090 GN=Immt PE=1 SV=1	27	19	33	1	757	83.8	6.61	70.7	92.3	92.8	92.5	107.6	107.6	107.2	0.861042	1.82251e-07	76614
P80313	Cct7	T-complex protein 1 subunit eta OS=Mus musculus OX=10090 GN=Cct7 PE=1 SV=1	37	18	35	18	544	59.6	7.84	64.26	107.1	107.6	108.1	93.5	90.4	93.3	1.1645	0.000128669	12468
Q9CQV8	Ywhab	14-3-3 protein beta/alpha OS=Mus musculus OX=10090 GN=Ywhab PE=1 SV=3	44	11	46	4	246	28.1	4.83	111.74	104.1	102.6	98.9	94.7	99.5	100.3	1.03769	0.188023	54401
Q99PV0	Prpf8	Pre-mRNA-processing-splicing factor 8 OS=Mus musculus OX=10090 GN=Prpf8 PE=1 SV=2	14	30	42	30	2335	273.4	8.84	64.83	106.9	108.9	105.3	93.7	94	91.1	1.15172	0.000531815	192159
P05784	Krt18	Keratin, type I cytoskeletal 18 OS=Mus musculus OX=10090 GN=Krt18 PE=1 SV=5	50	21	36	19	423	47.5	5.33	77.13	86.8	87.2	88.5	112.8	112.1	112.5	0.778008	1.42663e-06	16668
Q00PI9	Hnrnpul2	Heterogeneous nuclear ribonucleoprotein U-like protein 2 OS=Mus musculus OX=10090 GN=Hnrnpul2 PE=1 SV=2	28	22	39	22	745	84.9	4.89	62.95	105.5	106.2	108.4	95	92.2	92.6	1.14403	0.00040683	68693
Q9CWF2	Tubb2b	Tubulin beta-2B chain OS=Mus musculus OX=10090 GN=Tubb2b PE=1 SV=1	35	14	72	1	445	49.9	4.89	114	111.5	123.6	119	92.1	73.5	80.2	1.4406	0.00509239	73710
P21614	Gc	Vitamin D-binding protein OS=Mus musculus OX=10090 GN=Gc PE=1 SV=2	37	14	28	14	476	53.6	5.5	54.94	86.3	80.2	84.7	119.4	108.6	120.8	0.720183	0.0015864	14473
P01942	Hba	Hemoglobin subunit alpha OS=Mus musculus OX=10090 GN=Hba PE=1 SV=2	64	8	168	8	142	15.1	8.22	304.89	77	75.5	76.8	128.2	117.3	125.2	0.618559	0.000137044	-
P17426	Ap2a1	AP-2 complex subunit alpha-1 OS=Mus musculus OX=10090 GN=Ap2a1 PE=1 SV=1	25	23	39	18	977	107.6	7.03	57.12	101.1	98.2	99.2	99.9	98.3	103.3	0.99005	0.588396	11771
E9Q448	Tpm1	Tropomyosin alpha-1 chain OS=Mus musculus OX=10090 GN=Tpm1 PE=1 SV=1	52	18	43	1	284	32.8	4.75	70.47	95	95.1	91.9	100.2	115.3	102.4	0.887071	0.0682159	22003
Q8BSH3	Tpm1	Tropomyosin alpha-1 chain OS=Mus musculus OX=10090 GN=Tpm1 PE=1 SV=1	54	19	37	1	284	32.7	4.74	56.99	61.4	59.7	71.2	115.3	149.7	142.7	0.47167	0.00293405	22003
P48036	Anxa5	Annexin A5 OS=Mus musculus OX=10090 GN=Anxa5 PE=1 SV=1	66	21	46	20	319	35.7	4.96	76.29	92.6	94.1	92.4	105.6	107.7	107.6	0.869741	8.85685e-05	11747
Q64285	Cel	Bile salt-activated lipase OS=Mus musculus OX=10090 GN=Cel PE=1 SV=1	26	16	37	16	599	65.8	6.3	76.69	29.8	30.6	29.6	171.1	173.4	165.4	0.176505	5.1547e-07	12613
Q9CU62	Smc1a	Structural maintenance of chromosomes protein 1A OS=Mus musculus OX=10090 GN=Smc1a PE=1 SV=4	21	26	38	26	1233	143.1	7.64	66.25	108.2	108.8	110.2	90.5	91.4	91	1.19897	9.72617e-06	24061
P18242	Ctsd	Cathepsin D OS=Mus musculus OX=10090 GN=Ctsd PE=1 SV=1	37	12	49	12	410	44.9	7.15	85.75	155.7	146.4	152.2	48	47.7	50	3.11805	3.30722e-06	13033
P17156	Hspa2	Heat shock-related 70 kDa protein 2 OS=Mus musculus OX=10090 GN=Hspa2 PE=1 SV=2	27	17	45	7	633	69.6	5.67	91.98	98.9	96.4	100.5	103	101.5	99.6	0.972706	0.14809	15512
P30999	Ctnnd1	Catenin delta-1 OS=Mus musculus OX=10090 GN=Ctnnd1 PE=1 SV=2	29	27	33	26	938	104.9	6.87	61.25	85.6	85.4	86.3	117.8	109.5	115.4	0.750802	0.000329352	12388
Q00612	G6pdx	Glucose-6-phosphate 1-dehydrogenase X OS=Mus musculus OX=10090 GN=G6pdx PE=1 SV=3	43	23	38	23	515	59.2	6.49	78.88	123.8	120.2	121.4	77.5	78.7	78.4	1.55754	2.583e-06	14381
Q6IRU2	Tpm4	Tropomyosin alpha-4 chain OS=Mus musculus OX=10090 GN=Tpm4 PE=1 SV=3	51	17	36	15	248	28.5	4.68	62.17	97.7	91.6	93.4	108.3	101.3	107.7	0.890955	0.0160611	326618
Q6PB66	Lrpprc	Leucine-rich PPR motif-containing protein, mitochondrial OS=Mus musculus OX=10090 GN=Lrpprc PE=1 SV=2	23	29	34	29	1392	156.5	6.83	54.5	106	107.6	107.9	94.8	90	93.7	1.1544	0.000792912	72416
Q8VCT4	Ces1d	Carboxylesterase 1D OS=Mus musculus OX=10090 GN=Ces1d PE=1 SV=1	32	15	39	13	565	61.7	6.61	66.95	92.2	87.9	88.7	112.1	108.9	110.2	0.811594	0.000209326	104158
P32921	Wars	Tryptophan--tRNA ligase, cytoplasmic OS=Mus musculus OX=10090 GN=Wars PE=1 SV=2	49	22	39	22	481	54.3	6.89	53.56	101	99	96.2	100.3	103.2	100.4	0.974663	0.202487	22375
P47962	Rpl5	60S ribosomal protein L5 OS=Mus musculus OX=10090 GN=Rpl5 PE=1 SV=3	42	15	39	15	297	34.4	9.77	77.02	102.9	102.7	105	98.1	93.4	97.9	1.07326	0.0142271	100503670
A2AIM4	Tpm2	Tropomyosin beta chain OS=Mus musculus OX=10090 GN=Tpm2 PE=1 SV=1	49	17	37	8	284	33	4.69	71.92	78.9	80.2	79.2	120	122.6	119.1	0.658833	3.28777e-06	22004
E9Q9E1	Eif4g1	Eukaryotic translation initiation factor 4 gamma 1 OS=Mus musculus OX=10090 GN=Eif4g1 PE=1 SV=1	21	27	37	24	1593	175.2	5.38	52.68	103.5	104.2	103.5	96.9	95	97	1.07719	0.000423876	208643
A0A0R4J083	Acadl	Long-chain-specific acyl-CoA dehydrogenase, mitochondrial OS=Mus musculus OX=10090 GN=Acadl PE=1 SV=1	33	12	29	12	430	47.9	8.15	53.21	99.5	98.9	96.8	98.4	111.2	95.2	0.968504	0.553669	11363
Q9DCD0	Pgd	6-phosphogluconate dehydrogenase, decarboxylating OS=Mus musculus OX=10090 GN=Pgd PE=1 SV=3	30	16	45	16	483	53.2	7.23	90.66	128.1	123.8	125.6	73.3	73.1	76.1	1.69663	5.19738e-06	110208
Q8BVQ9	Psmc2	26S proteasome regulatory subunit 7 OS=Mus musculus OX=10090 GN=Psmc2 PE=1 SV=1	42	20	34	20	475	52.8	6.28	66.92	100.6	102.5	106.7	98.3	91.4	100.6	1.06717	0.120197	19181
O88342	Wdr1	WD repeat-containing protein 1 OS=Mus musculus OX=10090 GN=Wdr1 PE=1 SV=3	47	24	36	24	606	66.4	6.6	58.12	114.8	111.9	114.3	86.6	83.6	88.7	1.31711	9.3208e-05	22388
Q05816	Fabp5	Fatty acid-binding protein 5 OS=Mus musculus OX=10090 GN=Fabp5 PE=1 SV=3	73	9	40	9	135	15.1	6.54	85.56	133.6	133.1	131.2	64.7	69.8	67.7	1.96785	2.44894e-06	16592
Q6P4T2	Snrnp200	U5 small nuclear ribonucleoprotein 200 kDa helicase OS=Mus musculus OX=10090 GN=Snrnp200 PE=1 SV=1	12	25	31	25	2136	244.4	6.06	52.34	109.6	110.6	111.2	87.1	92.2	89.3	1.2338	0.000173433	320632
Q8BH64	Ehd2	EH domain-containing protein 2 OS=Mus musculus OX=10090 GN=Ehd2 PE=1 SV=1	38	21	50	18	543	61.1	6.51	87.22	80.6	79.1	80.1	122	116	122.2	0.665741	4.26387e-05	259300
P40936	Inmt	Indolethylamine N-methyltransferase OS=Mus musculus OX=10090 GN=Inmt PE=1 SV=1	39	10	56	10	264	29.4	6.39	112.06	78.4	76.4	77.1	125.9	120.6	121.7	0.629821	1.21478e-05	21743
Q8BMS1	Hadha	Trifunctional enzyme subunit alpha, mitochondrial OS=Mus musculus OX=10090 GN=Hadha PE=1 SV=1	31	20	40	20	763	82.6	9.14	68.05	96.8	92.6	96.2	106.5	104	103.9	0.908397	0.00356387	97212
Q9JIK5	Ddx21	Nucleolar RNA helicase 2 OS=Mus musculus OX=10090 GN=Ddx21 PE=1 SV=3	34	25	30	25	851	93.5	9.11	53.11	115.7	114	112.8	87.5	84.1	85.8	1.33061	2.55235e-05	56200
A0A1B0GSX0	Ldha	L-lactate dehydrogenase OS=Mus musculus OX=10090 GN=Ldha PE=1 SV=1	37	13	38	12	361	39.7	8.35	79.42	124.7	119.6	120.9	77.3	78.2	79.4	1.5547	1.22745e-05	16828
A2API8	Akap2	A-kinase anchor protein 2 OS=Mus musculus OX=10090 GN=Akap2 PE=1 SV=1	24	22	41	22	921	101.5	5.2	48.17	78.2	81.2	80.2	118.9	121.4	120	0.665001	3.85578e-06	-
O08677	Kng1	Kininogen-1 OS=Mus musculus OX=10090 GN=Kng1 PE=1 SV=1	24	14	31	13	661	73.1	6.54	67.71	82	81.3	78.2	118.9	121.8	117.9	0.673452	1.90509e-05	16644
P10649	Gstm1	Glutathione S-transferase Mu 1 OS=Mus musculus OX=10090 GN=Gstm1 PE=1 SV=2	58	15	49	7	218	26	7.94	87.02	78.5	78.1	78.2	122.9	119.2	123.1	0.642935	4.3981e-06	14862
O08529	Capn2	Calpain-2 catalytic subunit OS=Mus musculus OX=10090 GN=Capn2 PE=1 SV=4	23	15	31	15	700	79.8	4.96	67.95	91	87.9	88.6	106.8	117.9	107.9	0.804269	0.00402977	12334
P80315	Cct4	T-complex protein 1 subunit delta OS=Mus musculus OX=10090 GN=Cct4 PE=1 SV=3	43	23	31	22	539	58	8.02	66.25	103.4	102.9	106.3	96.6	93.9	96.9	1.08768	0.00415246	12464
P06745	Gpi	Glucose-6-phosphate isomerase OS=Mus musculus OX=10090 GN=Gpi PE=1 SV=4	33	18	43	18	558	62.7	8.13	64.37	117	114.5	113.7	83	88.5	83.3	1.35479	0.000123082	-
E9Q800	Immt	MICOS complex subunit MIC60 OS=Mus musculus OX=10090 GN=Immt PE=1 SV=1	29	18	28	1	679	75.6	7.8	65.27	81.5	73.4	86.1	135	108	115.9	0.671496	0.0112519	76614
Q3TXS7	Psmd1	26S proteasome non-ATPase regulatory subunit 1 OS=Mus musculus OX=10090 GN=Psmd1 PE=1 SV=1	27	24	34	24	953	105.7	5.39	60.68	107.1	107.1	107.3	92.2	89.6	96.7	1.1544	0.00230385	70247
E9QAI5	Cad	CAD protein OS=Mus musculus OX=10090 GN=Cad PE=1 SV=1	15	26	32	25	2162	236.1	6.49	51.89	98.8	106.7	102.4	94.5	101.5	96	1.05445	0.164734	69719
Q9D0I9	Rars	Arginine--tRNA ligase, cytoplasmic OS=Mus musculus OX=10090 GN=Rars PE=1 SV=2	33	18	32	18	660	75.6	7.55	56.88	110.6	110.8	110.9	89.3	90.5	88	1.24085	7.79508e-06	104458
P40124	Cap1	Adenylyl cyclase-associated protein 1 OS=Mus musculus OX=10090 GN=Cap1 PE=1 SV=4	37	16	42	15	474	51.5	7.52	75.72	115.9	114.8	114.8	83.9	84.6	86.1	1.35703	2.18819e-06	12331
Q9WTQ5	Akap12	A-kinase anchor protein 12 OS=Mus musculus OX=10090 GN=Akap12 PE=1 SV=1	19	21	27	21	1684	180.6	4.44	37.89	76.7	76.7	78	121.6	123.8	123.3	0.627611	5.43618e-07	83397
P68510	Ywhah	14-3-3 protein eta OS=Mus musculus OX=10090 GN=Ywhah PE=1 SV=2	46	14	43	9	246	28.2	4.89	89.12	104.6	103.9	106.1	94.6	93.6	97.1	1.1027	0.00134766	22629
P17427	Ap2a2	AP-2 complex subunit alpha-2 OS=Mus musculus OX=10090 GN=Ap2a2 PE=1 SV=2	25	21	37	16	938	104	6.93	58.57	99.7	98.9	96.5	103.9	97	104	0.967858	0.262745	11772
D3Z6I8	Tpm3	Tropomyosin alpha-3 chain OS=Mus musculus OX=10090 GN=Tpm3 PE=1 SV=1	44	14	37	2	247	28.7	4.79	70.84	78.9	77.5	78.3	119.1	124	122.3	0.64231	8.20138e-06	59069
Q60597	Ogdh	2-oxoglutarate dehydrogenase, mitochondrial OS=Mus musculus OX=10090 GN=Ogdh PE=1 SV=3	21	21	36	21	1023	116.4	6.83	68.55	100.8	98.1	98	102.1	97.9	103.2	0.979222	0.321352	18293
E9QMC1	Cgn	Cingulin OS=Mus musculus OX=10090 GN=Cgn PE=1 SV=1	22	28	35	27	1192	136.5	5.91	55.1	89.7	95.8	91.8	106.9	111.3	104.5	0.859312	0.00482336	70737
Q921K2	Parp1	Poly [ADP-ribose] polymerase OS=Mus musculus OX=10090 GN=Parp1 PE=1 SV=1	26	26	33	26	1014	112.7	8.95	42.89	120.8	117.5	118.8	80.9	81.4	80.6	1.47015	2.70726e-06	11545
P46460	Nsf	Vesicle-fusing ATPase OS=Mus musculus OX=10090 GN=Nsf PE=1 SV=2	28	22	36	21	744	82.6	6.95	62.97	100.8	103.4	103.1	99.8	93.7	99.1	1.05024	0.0794706	18195
Q8BWT1	Acaa2	3-ketoacyl-CoA thiolase, mitochondrial OS=Mus musculus OX=10090 GN=Acaa2 PE=1 SV=3	50	15	36	15	397	41.8	8.09	58.8	95.8	96.5	95.6	103.5	105.1	103.6	0.922165	0.000157716	52538
P51660	Hsd17b4	Peroxisomal multifunctional enzyme type 2 OS=Mus musculus OX=10090 GN=Hsd17b4 PE=1 SV=3	28	18	29	18	735	79.4	8.57	60.46	109.5	110.4	109.8	88.4	90.1	91.8	1.21976	4.09617e-05	15488
P68040	Rack1	Receptor of activated protein C kinase 1 OS=Mus musculus OX=10090 GN=Rack1 PE=1 SV=3	44	14	33	14	317	35.1	7.69	68.83	101.3	99.2	99.8	100.4	99.6	99.8	1.00167	0.815575	14694
Q8CGB6	Tns2	Tensin-2 OS=Mus musculus OX=10090 GN=Tns2 PE=1 SV=1	21	24	33	22	1400	151.9	8.48	60.72	81.8	87.6	84.3	116.2	116.4	113.7	0.732602	8.24311e-05	209039
Q8QZT1	Acat1	Acetyl-CoA acetyltransferase, mitochondrial OS=Mus musculus OX=10090 GN=Acat1 PE=1 SV=1	46	17	34	17	424	44.8	8.51	61.92	93	87.5	91.4	109.7	110	108.4	0.828711	0.000390409	110446
E9PWE8	Dpysl3	Dihydropyrimidinase-related protein 3 OS=Mus musculus OX=10090 GN=Dpysl3 PE=1 SV=1	32	15	29	13	683	73.8	6.46	65.23	96.2	96.7	96.5	99	108.6	103	0.931745	0.0643361	22240
Q63918	Cavin2	Caveolae-associated protein 2 OS=Mus musculus OX=10090 GN=Cavin2 PE=1 SV=3	48	17	38	17	418	46.7	5.21	76.88	78.9	78.1	79.1	120.3	123.5	120	0.648983	3.30338e-06	20324
Q3UPL0	Sec31a	Protein transport protein Sec31A OS=Mus musculus OX=10090 GN=Sec31a PE=1 SV=2	17	21	32	21	1230	133.5	6.76	68.33	104.2	102.4	106.6	97	92	97.8	1.09205	0.0157618	69162
Q8R1B4	Eif3c	Eukaryotic translation initiation factor 3 subunit C OS=Mus musculus OX=10090 GN=Eif3c PE=1 SV=1	25	21	31	21	911	105.5	5.78	63.35	108.2	106.9	106.8	94.8	90.8	92.4	1.15791	0.000301438	56347
Q61941	Nnt	NAD(P) transhydrogenase, mitochondrial OS=Mus musculus OX=10090 GN=Nnt PE=1 SV=2	26	25	29	25	1086	113.8	7.64	54.15	92.2	91	91.9	107.8	108.9	108.2	0.846722	4.27784e-06	18115
P05202	Got2	Aspartate aminotransferase, mitochondrial OS=Mus musculus OX=10090 GN=Got2 PE=1 SV=1	38	14	26	14	430	47.4	9	52.75	104.4	102.5	104.1	97.7	89	102.4	1.07575	0.139744	14719
Q8CIB5	Fermt2	Fermitin family homolog 2 OS=Mus musculus OX=10090 GN=Fermt2 PE=1 SV=1	28	21	32	16	680	77.8	6.7	65.61	83	83.2	83.4	120.3	115.1	114.9	0.712532	4.56817e-05	218952
Q9ERU9	Ranbp2	E3 SUMO-protein ligase RanBP2 OS=Mus musculus OX=10090 GN=Ranbp2 PE=1 SV=2	10	28	31	28	3053	340.9	6.18	51.88	109.7	106.8	103.4	92.2	95.2	92.6	1.1425	0.00290558	19386
Q62167	Ddx3x	ATP-dependent RNA helicase DDX3X OS=Mus musculus OX=10090 GN=Ddx3x PE=1 SV=3	28	18	33	17	662	73.1	7.18	69.07	103.1	104	107	95.3	94.3	96.3	1.09864	0.00201335	13205
Q3U7R1	Esyt1	Extended synaptotagmin-1 OS=Mus musculus OX=10090 GN=Esyt1 PE=1 SV=2	14	16	25	16	1092	121.5	5.95	57.69	112.1	114.8	110.2	84.2	91.8	86.9	1.28224	0.000675636	23943
O54724	Cavin1	Caveolae-associated protein 1 OS=Mus musculus OX=10090 GN=Cavin1 PE=1 SV=1	36	15	49	15	392	43.9	5.52	84.11	82	81.2	79	116.1	128.1	113.6	0.676914	0.00107822	19285
Q3U1J4	Ddb1	DNA damage-binding protein 1 OS=Mus musculus OX=10090 GN=Ddb1 PE=1 SV=2	25	25	35	25	1140	126.8	5.26	66.86	106.8	106.1	105.6	95.1	94.2	92.3	1.13104	0.0001629	13194
P01867	Igh-3	Ig gamma-2B chain C region OS=Mus musculus OX=10090 GN=Igh-3 PE=1 SV=3	34	10	50	10	404	44.2	6.52	80.21	98.1	100	96.6	100.2	105.3	99.7	0.965596	0.161646	-
Q9D0F9	Pgm1	Phosphoglucomutase-1 OS=Mus musculus OX=10090 GN=Pgm1 PE=1 SV=4	29	17	30	16	562	61.4	6.57	63.32	110.8	109.3	110	89.9	89.5	90.5	1.22305	2.72987e-06	72157
P27612	Plaa	Phospholipase A-2-activating protein OS=Mus musculus OX=10090 GN=Plaa PE=1 SV=4	26	17	26	17	794	87.2	6.14	45.93	98.1	102.5	105.2	102	95.5	96.7	1.03943	0.249922	18786
Q64514	Tpp2	Tripeptidyl-peptidase 2 OS=Mus musculus OX=10090 GN=Tpp2 PE=1 SV=3	22	24	35	24	1262	139.8	6.58	53.13	108.2	116.2	108.5	89.4	88.9	88.9	1.24588	0.00112561	22019
Q6PHQ9	Pabpc4	Polyadenylate-binding protein OS=Mus musculus OX=10090 GN=Pabpc4 PE=1 SV=1	29	21	33	17	660	72.2	9.39	58.98	76.7	77.8	77.5	124.4	121.1	122.4	0.630606	1.5033e-06	230721
Q9R069	Bcam	Basal cell adhesion molecule OS=Mus musculus OX=10090 GN=Bcam PE=1 SV=1	34	16	29	16	622	67.6	6.25	63.98	89.3	87.1	87.9	108.9	113.6	113.3	0.787076	0.000133401	57278
Q62465	Vat1	Synaptic vesicle membrane protein VAT-1 homolog OS=Mus musculus OX=10090 GN=Vat1 PE=1 SV=3	31	10	30	10	406	43.1	6.37	54.71	99.3	95.9	97.3	104.3	102.3	100.9	0.95122	0.0230925	26949
P62908	Rps3	40S ribosomal protein S3 OS=Mus musculus OX=10090 GN=Rps3 PE=1 SV=1	56	15	34	15	243	26.7	9.66	67.68	103.8	103	101.1	98.8	97.6	95.7	1.05409	0.0120115	27050
E9QAX2	Myo18a	Unconventional myosin-XVIIIa OS=Mus musculus OX=10090 GN=Myo18a PE=1 SV=1	13	25	32	25	2083	235.7	6.07	46.51	106	106.7	104.6	95.9	91.5	95.2	1.12279	0.00151517	360013
Q60932	Vdac1	Voltage-dependent anion-selective channel protein 1 OS=Mus musculus OX=10090 GN=Vdac1 PE=1 SV=3	50	11	24	10	296	32.3	8.43	52.32	105.8	100.6	101.9	100.7	92.2	98.8	1.05691	0.140126	22333
P80314	Cct2	T-complex protein 1 subunit beta OS=Mus musculus OX=10090 GN=Cct2 PE=1 SV=4	36	17	29	17	535	57.4	6.4	51.03	105.2	109.7	105.2	90.1	95.9	93.8	1.14403	0.00404258	12461
Q922R8	Pdia6	Protein disulfide-isomerase A6 OS=Mus musculus OX=10090 GN=Pdia6 PE=1 SV=3	42	14	38	14	440	48.1	5.14	70.04	111.6	118	115.8	82.1	90.5	82	1.35664	0.000865371	71853
P97371	Psme1	Proteasome activator complex subunit 1 OS=Mus musculus OX=10090 GN=Psme1 PE=1 SV=2	62	16	37	16	249	28.7	5.97	72.65	126.1	118.3	120	78.8	78.7	78.2	1.54603	5.52584e-05	19186
Q5SYD0	Myo1d	Unconventional myosin-Id OS=Mus musculus OX=10090 GN=Myo1d PE=1 SV=1	21	19	28	18	1006	116	9.41	58.78	89.7	88.2	89.2	108	112.4	112.5	0.802343	0.000143967	338367
Q61635	Ifi47	GTP-binding protein OS=Mus musculus OX=10090 GN=Ifi47 PE=1 SV=1	47	19	26	16	420	46.8	6.74	48.87	132.4	128	126.7	71.1	70.6	71.1	1.81908	4.71804e-06	15953
Q3TLP8	Rac1	RAS-related C3 botulinum substrate 1, isoform CRA_a OS=Mus musculus OX=10090 GN=Rac1 PE=1 SV=1	37	9	35	3	211	23.4	8.69	87.11	102.5	100.9	103.7	97.9	96.4	98.6	1.04848	0.0103624	19353
Q8K0E8	Fgb	Fibrinogen beta chain OS=Mus musculus OX=10090 GN=Fgb PE=1 SV=1	41	17	45	17	481	54.7	7.08	71.88	72	74.3	73.7	124.4	133.4	122.2	0.578947	0.000107502	110135
P35700	Prdx1	Peroxiredoxin-1 OS=Mus musculus OX=10090 GN=Prdx1 PE=1 SV=1	70	12	49	10	199	22.2	8.12	92.25	114.2	113.5	112.5	86.3	85.7	87.8	1.30947	4.63797e-06	18477
Q02257	Jup	Junction plakoglobin OS=Mus musculus OX=10090 GN=Jup PE=1 SV=3	28	19	28	17	745	81.7	6.14	55.71	83.9	84.7	85.5	119.2	110.1	116.6	0.734605	0.000368699	16480
Q6Q899	Ddx58	Probable ATP-dependent RNA helicase DDX58 OS=Mus musculus OX=10090 GN=Ddx58 PE=1 SV=2	24	22	32	22	926	105.9	6.65	62.56	111.4	112.3	113.1	87.5	85.9	89.9	1.27915	4.14814e-05	230073
Q9JJ28	Flii	Protein flightless-1 homolog OS=Mus musculus OX=10090 GN=Flii PE=1 SV=1	20	23	31	23	1271	144.7	6.06	53.7	104.9	103	104.6	97.9	91.6	97.9	1.08733	0.0185267	14248
Q62151	Ager	Advanced glycosylation end product-specific receptor OS=Mus musculus OX=10090 GN=Ager PE=1 SV=2	33	12	48	12	402	42.6	6.07	98.44	81.4	80	81.7	116.3	119.8	120.7	0.681334	1.24077e-05	11596
Q9WVA4	Tagln2	Transgelin-2 OS=Mus musculus OX=10090 GN=Tagln2 PE=1 SV=4	54	12	39	12	199	22.4	8.24	80.72	92.4	89.6	91.9	115.1	100	111	0.839926	0.0192526	21346
Q8BFR5	Tufm	Elongation factor Tu, mitochondrial OS=Mus musculus OX=10090 GN=Tufm PE=1 SV=1	40	17	29	17	452	49.5	7.56	57.89	95.6	97.1	93.8	104.2	105.5	103.8	0.913876	0.00114606	233870
P43276	Hist1h1b	Histone H1.5 OS=Mus musculus OX=10090 GN=Hist1h1b PE=1 SV=2	37	13	43	8	223	22.6	10.92	87.79	139.4	131.8	131.1	63	69.9	64.8	2.0349	3.50515e-05	-
Q62318	Trim28	Transcription intermediary factor 1-beta OS=Mus musculus OX=10090 GN=Trim28 PE=1 SV=3	25	19	31	19	834	88.8	5.77	61.24	111.3	109.8	110.7	89.7	91.2	87.2	1.2376	6.94174e-05	21849
P70336	Rock2	Rho-associated protein kinase 2 OS=Mus musculus OX=10090 GN=Rock2 PE=1 SV=1	20	26	32	23	1388	160.5	5.99	51.88	95.2	95.2	97	104.6	101.4	106.6	0.919386	0.00671267	19878
Q8CIN4	Pak2	Serine/threonine-protein kinase PAK 2 OS=Mus musculus OX=10090 GN=Pak2 PE=1 SV=1	36	15	28	12	524	57.9	5.77	54.96	112.3	108.9	110.6	90.5	86.8	90.9	1.23714	0.000203123	224105
G5E874	Lamc2	Laminin subunit gamma-2 OS=Mus musculus OX=10090 GN=Lamc2 PE=1 SV=1	19	20	27	20	1193	130.3	6.47	53.34	87.8	89.6	91.8	110	108.2	112.6	0.813785	0.000284043	16782
F8WGE3	Abca8a	ATP-binding cassette sub-family A member 8-A OS=Mus musculus OX=10090 GN=Abca8a PE=1 SV=1	13	19	28	15	1619	183.7	7.36	46.81	79.5	81.7	80.7	123.1	111.3	123.6	0.675698	0.000682367	217258
Q8C3J5	Dock2	Dedicator of cytokinesis protein 2 OS=Mus musculus OX=10090 GN=Dock2 PE=1 SV=3	16	27	35	26	1828	211.6	6.99	51.14	122.8	120.8	122.5	76.9	76.5	80.4	1.56587	5.82301e-06	94176
Q8K2I3	Fmo2	Dimethylaniline monooxygenase [N-oxide-forming] 2 OS=Mus musculus OX=10090 GN=Fmo2 PE=1 SV=3	31	16	38	16	535	60.9	8.47	64.38	78.8	76	78.4	125	118.1	123.6	0.635942	4.06414e-05	55990
P06684	C5	Complement C5 OS=Mus musculus OX=10090 GN=C5 PE=1 SV=2	13	21	30	21	1680	188.8	6.81	47.75	93.9	92.9	91.2	108.9	103.8	109.3	0.863354	0.00163397	-
Q9CZJ2	Hspa12b	Heat shock 70 kDa protein 12B OS=Mus musculus OX=10090 GN=Hspa12b PE=1 SV=1	28	18	26	17	685	76.1	8.47	60.77	83.8	85	86	114.3	115.3	115.7	0.737909	2.40839e-06	72630
F8VQ28	Pxn	Paxillin OS=Mus musculus OX=10090 GN=Pxn PE=1 SV=1	27	15	27	15	591	64.5	6.02	53.42	97.8	93.2	94.1	107.3	102.9	104.7	0.905367	0.00639913	19303
P63158	Hmgb1	High mobility group protein B1 OS=Mus musculus OX=10090 GN=Hmgb1 PE=1 SV=2	41	12	42	10	215	24.9	5.74	63.85	105.9	99.7	103.5	98.1	93.1	99.7	1.06256	0.0867266	15289
Q9WUB3	Pygm	Glycogen phosphorylase, muscle form OS=Mus musculus OX=10090 GN=Pygm PE=1 SV=3	29	22	28	15	842	97.2	7.11	69.59	74.6	78.4	82.2	126.2	117.1	121.6	0.64456	0.000226146	19309
P17751	Tpi1	Triosephosphate isomerase OS=Mus musculus OX=10090 GN=Tpi1 PE=1 SV=4	37	10	32	10	299	32.2	5.74	76.55	118.1	114.8	111.8	88	82.3	85	1.35018	0.000263695	21991
D3Z041	Acsl1	Long-chain-fatty-acid--CoA ligase 1 OS=Mus musculus OX=10090 GN=Acsl1 PE=1 SV=1	30	18	26	16	699	78	7.47	46.34	94.5	92.2	91.5	105.4	107.6	108.7	0.864781	0.000398947	14081
E9PWK1	Ephx1	Epoxide hydrolase OS=Mus musculus OX=10090 GN=Ephx1 PE=1 SV=1	37	17	27	17	441	50.9	8.15	44.73	89.2	96.1	92.4	104	109.3	108.9	0.861887	0.0048151	13849
Q99KK7	Dpp3	Dipeptidyl peptidase 3 OS=Mus musculus OX=10090 GN=Dpp3 PE=1 SV=2	30	18	25	18	738	82.8	5.38	55.82	113.5	115	116.6	83.4	85.9	85.7	1.35333	1.52236e-05	75221
P48722	Hspa4l	Heat shock 70 kDa protein 4L OS=Mus musculus OX=10090 GN=Hspa4l PE=1 SV=2	28	22	30	20	838	94.3	5.74	45.44	97.1	97.6	97.7	102.8	100.1	104.8	0.950276	0.0206397	18415
Q64511	Top2b	DNA topoisomerase 2-beta OS=Mus musculus OX=10090 GN=Top2b PE=1 SV=2	17	26	29	23	1612	181.8	8.29	43.51	108.9	107.3	106.5	90.1	94.9	92.3	1.16372	0.000626358	21974
Q91YQ5	Rpn1	Dolichyl-diphosphooligosaccharide--protein glycosyltransferase subunit 1 OS=Mus musculus OX=10090 GN=Rpn1 PE=1 SV=1	39	22	36	22	608	68.5	6.46	66.24	109.7	111	108.1	89.4	92.3	89.6	1.21194	0.000107578	103963
Q8R2S8	Cd177	CD177 antigen OS=Mus musculus OX=10090 GN=Cd177 PE=2 SV=1	28	19	29	19	817	87	5.67	52.33	131.5	126	129.3	70.1	69.6	73.5	1.81426	8.73051e-06	68891
E9Q555	Rnf213	E3 ubiquitin-protein ligase RNF213 OS=Mus musculus OX=10090 GN=Rnf213 PE=1 SV=2	7	30	33	30	5152	584.4	6.8	36.62	116	118.7	112.5	83.2	86	83.5	1.37396	9.53562e-05	672511
F8WHM5	Glg1	Golgi apparatus protein 1 (Fragment) OS=Mus musculus OX=10090 GN=Glg1 PE=1 SV=1	21	26	33	26	1163	132.3	6.93	69.31	116.5	112.9	117	85.9	80.2	87.6	1.36539	0.000280102	20340
A0A0R4J0Q5	Lmnb2	Lamin-B2 OS=Mus musculus OX=10090 GN=Lmnb2 PE=1 SV=1	40	23	27	23	615	69	5.55	52.93	91.5	96	92.2	107.6	108.7	104	0.873244	0.00245243	16907
Q9D8N0	Eef1g	Elongation factor 1-gamma OS=Mus musculus OX=10090 GN=Eef1g PE=1 SV=3	35	18	37	18	437	50	6.74	55.82	110.4	108.3	109.2	92.7	89.4	89.9	1.20551	9.82866e-05	67160
P60335	Pcbp1	Poly(rC)-binding protein 1 OS=Mus musculus OX=10090 GN=Pcbp1 PE=1 SV=1	42	12	26	7	356	37.5	7.09	60.22	106.1	105.1	105	92.6	96.4	94.9	1.11377	0.000748268	23983
Q5UE59	Klc1	Kinesin light chain 1 OS=Mus musculus OX=10090 GN=Klc1 PE=1 SV=1	41	22	26	17	542	61.6	5.76	45.29	96.6	99.3	98.2	102.9	99.6	103.2	0.962054	0.0501802	16593
P62983	Rps27a	Ubiquitin-40S ribosomal protein S27a OS=Mus musculus OX=10090 GN=Rps27a PE=1 SV=2	67	11	51	11	156	17.9	9.64	81.07	102.3	102	101.4	98	98.2	98	1.03909	0.00014893	78294
Q5SWU9	Acaca	Acetyl-CoA carboxylase 1 OS=Mus musculus OX=10090 GN=Acaca PE=1 SV=1	13	29	36	24	2345	265.1	6.39	47.83	102.7	102.7	101.9	96.7	98.4	97.7	1.04952	0.000995984	107476
E9Q5L2	Itih4	Inter alpha-trypsin inhibitor, heavy chain 4 OS=Mus musculus OX=10090 GN=Itih4 PE=1 SV=1	17	15	26	15	925	102.8	6.37	53.12	59.7	60.5	58.7	142.2	137.6	141.2	0.424941	6.97019e-07	16427
Q6P8U6	Pnlip	Pancreatic triacylglycerol lipase OS=Mus musculus OX=10090 GN=Pnlip PE=1 SV=1	33	12	27	11	465	51.4	6.83	65.9	36.8	38	39.1	164.5	159.7	161.9	0.234314	1.41564e-07	69060
Q9EQ20	Aldh6a1	Methylmalonate-semialdehyde dehydrogenase [acylating], mitochondrial OS=Mus musculus OX=10090 GN=Aldh6a1 PE=1 SV=1	33	15	27	15	535	57.9	8.07	46.62	75.5	76.1	76	125.2	123.4	123.8	0.611171	1.21901e-07	104776
Q9DBJ1	Pgam1	Phosphoglycerate mutase 1 OS=Mus musculus OX=10090 GN=Pgam1 PE=1 SV=3	45	10	30	8	254	28.8	7.18	32.33	119.2	113.3	117.5	83.4	82	84.5	1.40056	6.13296e-05	18648
B1AU25	Aifm1	Apoptosis-inducing factor 1, mitochondrial OS=Mus musculus OX=10090 GN=Aifm1 PE=1 SV=1	33	19	30	19	608	66.1	9.11	53	99.7	105.2	100.2	99.9	98	97	1.03459	0.156356	26926
Q9Z2I9	Sucla2	Succinate--CoA ligase [ADP-forming] subunit beta, mitochondrial OS=Mus musculus OX=10090 GN=Sucla2 PE=1 SV=2	35	17	26	17	463	50.1	7.01	56.29	94.1	94.1	93.7	105.4	106	106.7	0.886199	7.0931e-06	20916
P97351	Rps3a	40S ribosomal protein S3a OS=Mus musculus OX=10090 GN=Rps3a PE=1 SV=3	59	20	40	20	264	29.9	9.73	61.15	102.8	103.6	100.9	94.2	103.6	94.8	1.05024	0.193886	-
Q3V3R4	Itga1	Integrin alpha-1 OS=Mus musculus OX=10090 GN=Itga1 PE=1 SV=2	16	19	28	19	1179	130.7	6.2	52.9	90.5	90.9	92.3	112	104.7	109.6	0.838799	0.00138148	109700
Q8VCM7	Fgg	Fibrinogen gamma chain OS=Mus musculus OX=10090 GN=Fgg PE=1 SV=1	31	14	36	14	436	49.4	5.86	65.15	73.5	72.6	72.6	128.1	125.7	127.6	0.573414	2.70059e-07	99571
Q60675	Lama2	Laminin subunit alpha-2 OS=Mus musculus OX=10090 GN=Lama2 PE=1 SV=2	11	29	29	29	3118	343.6	6.09	56.35	83.5	83.3	84.6	114.8	117.2	116.7	0.720964	2.62846e-06	16773
P11983	Tcp1	T-complex protein 1 subunit alpha OS=Mus musculus OX=10090 GN=Tcp1 PE=1 SV=3	28	14	20	14	556	60.4	6.16	49.41	109.9	106.4	105.6	94.9	90.6	92.7	1.15708	0.00130046	21454
P24369	Ppib	Peptidyl-prolyl cis-trans isomerase B OS=Mus musculus OX=10090 GN=Ppib PE=1 SV=2	47	12	32	11	216	23.7	9.55	72.55	116.6	112.4	111.7	86.2	86	87.2	1.31342	6.68464e-05	19035
O08709	Prdx6	Peroxiredoxin-6 OS=Mus musculus OX=10090 GN=Prdx6 PE=1 SV=3	43	9	39	9	224	24.9	6.01	79.44	81.7	83.2	89.5	115.6	112.2	117.8	0.736111	0.000463082	11758
P45376	Akr1b1	Aldose reductase OS=Mus musculus OX=10090 GN=Akr1b1 PE=1 SV=3	54	18	42	18	316	35.7	7.18	65.93	106.9	103.9	104.6	97.1	92.4	95.1	1.10822	0.00328945	-
E9QAH1	Golgb1	Golgi autoantigen, golgin subfamily b, macrogolgin 1 OS=Mus musculus OX=10090 GN=Golgb1 PE=1 SV=1	8	24	26	24	3197	365.1	5.06	38.55	105.7	104.1	104.9	94.7	95.5	95.1	1.10305	4.54138e-05	224139
P50247	Ahcy	Adenosylhomocysteinase OS=Mus musculus OX=10090 GN=Ahcy PE=1 SV=3	36	15	37	15	432	47.7	6.54	61.44	84.3	85.5	82.6	113.3	121	113.4	0.725913	0.000292319	269378
Q8BGQ7	Aars	Alanine--tRNA ligase, cytoplasmic OS=Mus musculus OX=10090 GN=Aars PE=1 SV=1	24	23	31	23	968	106.8	5.67	54.21	106.1	103.8	105.1	97.7	91.1	96.2	1.10526	0.00897515	234734
Q93092	Taldo1	Transaldolase OS=Mus musculus OX=10090 GN=Taldo1 PE=1 SV=2	43	18	32	18	337	37.4	7.03	54.93	113.4	109.7	113.2	89.5	86.8	87.4	1.27531	7.62868e-05	21351
P97429	Anxa4	Annexin A4 OS=Mus musculus OX=10090 GN=Anxa4 PE=1 SV=4	48	18	35	18	319	35.9	5.57	63.05	107.5	107	105.9	93.9	90.9	94.9	1.14551	0.000464242	11746
P97315	Csrp1	Cysteine and glycine-rich protein 1 OS=Mus musculus OX=10090 GN=Csrp1 PE=1 SV=3	68	12	30	12	193	20.6	8.57	59.57	84.8	85.1	83.4	113.7	118.7	114.4	0.730392	4.61063e-05	13007
Q5RKN9	Capza1	Capping protein (Actin filament) muscle Z-line, alpha 1 OS=Mus musculus OX=10090 GN=Capza1 PE=1 SV=1	53	10	21	8	286	32.9	5.55	39.84	114.5	112.8	115.7	83.2	85.3	88.5	1.33463	8.23357e-05	12340
P30416	Fkbp4	Peptidyl-prolyl cis-trans isomerase FKBP4 OS=Mus musculus OX=10090 GN=Fkbp4 PE=1 SV=5	36	17	27	17	458	51.5	5.72	57.58	100.3	100	99.7	99.5	100.7	99.8	1	1	14228
P15626	Gstm2	Glutathione S-transferase Mu 2 OS=Mus musculus OX=10090 GN=Gstm2 PE=1 SV=2	63	14	38	6	218	25.7	7.39	80.21	80.8	79.6	79.2	120.7	117.9	121.8	0.664817	5.65272e-06	14863
G3X982	Aox3	Aldehyde oxidase 3 OS=Mus musculus OX=10090 GN=Aox3 PE=1 SV=1	17	19	26	18	1335	146.8	6.46	44.11	97.3	94.1	98.8	102.8	104.1	102.9	0.936733	0.0107138	71724
Q9QZE5	Copg1	Coatomer subunit gamma-1 OS=Mus musculus OX=10090 GN=Copg1 PE=1 SV=1	24	16	33	15	874	97.5	5.35	49.35	110.6	111.8	109.4	87.6	92.9	87.7	1.23714	0.000354114	54161
Q04750	Top1	DNA topoisomerase 1 OS=Mus musculus OX=10090 GN=Top1 PE=1 SV=2	28	22	34	22	767	90.8	9.33	56.88	117.3	118.3	117.3	81.4	81	84.7	1.42817	8.49222e-06	21969
Q61335	Bcap31	B-cell receptor-associated protein 31 OS=Mus musculus OX=10090 GN=Bcap31 PE=1 SV=4	33	13	30	13	245	27.9	8.7	59.71	109.7	107.7	107.9	90.4	92.4	92	1.18377	4.43891e-05	27061
Q02819	Nucb1	Nucleobindin-1 OS=Mus musculus OX=10090 GN=Nucb1 PE=1 SV=2	33	16	24	16	459	53.4	5.07	55.06	109.3	111	108.4	91.7	90.1	89.5	1.21157	4.50378e-05	18220
Q3TCR7	Dnm2	Dynamin-2 OS=Mus musculus OX=10090 GN=Dnm2 PE=1 SV=1	23	19	28	15	869	97.9	7.44	57.11	110.2	108.7	108.2	92.6	89.3	91.1	1.19817	8.93267e-05	13430
Q4FE56	Usp9x	Probable ubiquitin carboxyl-terminal hydrolase FAF-X OS=Mus musculus OX=10090 GN=Usp9x PE=1 SV=1	12	27	31	26	2554	290	5.83	36.95	101.1	106	104.4	90.6	99.8	98.2	1.07935	0.0745334	22284
P28271	Aco1	Cytoplasmic aconitate hydratase OS=Mus musculus OX=10090 GN=Aco1 PE=1 SV=3	21	19	27	19	889	98.1	7.5	49.02	114.3	113	115.7	85.4	84.7	86.9	1.33463	9.32745e-06	11428
P62806	Hist1h4a	Histone H4 OS=Mus musculus OX=10090 GN=Hist1h4a PE=1 SV=2	59	8	88	8	103	11.4	11.36	172.84	110.8	109.2	111.6	89.1	87.2	92.1	1.23547	0.000188118	-
Q8K2B3	Sdha	Succinate dehydrogenase [ubiquinone] flavoprotein subunit, mitochondrial OS=Mus musculus OX=10090 GN=Sdha PE=1 SV=1	26	15	21	15	664	72.5	7.37	42.3	104.2	101.3	108.4	99.4	88.6	98	1.09755	0.0790569	66945
Q501J6	Ddx17	Probable ATP-dependent RNA helicase DDX17 OS=Mus musculus OX=10090 GN=Ddx17 PE=1 SV=1	24	15	31	10	650	72.4	8.59	52.06	109.6	103.8	108.4	94.3	95.2	88.8	1.15631	0.00557253	67040
E9Q175	Myo6	Unconventional myosin-VI OS=Mus musculus OX=10090 GN=Myo6 PE=1 SV=1	21	21	26	21	1253	144.7	8.51	40.16	86.8	88.9	87.4	113.1	110.8	113	0.780944	1.47351e-05	17920
P62631	Eef1a2	Elongation factor 1-alpha 2 OS=Mus musculus OX=10090 GN=Eef1a2 PE=1 SV=1	30	13	50	2	463	50.4	9.03	116.19	99.9	100.4	101.8	102.6	97.4	97.8	1.01444	0.462253	13628
Q8BMJ2	Lars	Leucine--tRNA ligase, cytoplasmic OS=Mus musculus OX=10090 GN=Lars PE=1 SV=2	16	18	21	18	1178	134.1	7.05	47.41	102	102.8	105.8	95.6	97.9	95.9	1.07326	0.00659234	107045
Q99LC5	Etfa	Electron transfer flavoprotein subunit alpha, mitochondrial OS=Mus musculus OX=10090 GN=Etfa PE=1 SV=2	36	9	21	9	333	35	8.38	48.51	97.3	95.5	94.2	102.2	108.2	102.7	0.91664	0.0148505	110842
Q04447	Ckb	Creatine kinase B-type OS=Mus musculus OX=10090 GN=Ckb PE=1 SV=1	38	11	23	10	381	42.7	5.67	60.8	101.9	106	102.9	93.2	96.7	99.3	1.07469	0.0288326	12709
Q8BML9	Qars	Glutamine--tRNA ligase OS=Mus musculus OX=10090 GN=Qars PE=1 SV=1	30	20	28	20	775	87.6	7.31	41.42	110.4	111.1	110.1	94	84.1	90.3	1.23547	0.00191526	97541
O35350	Capn1	Calpain-1 catalytic subunit OS=Mus musculus OX=10090 GN=Capn1 PE=1 SV=1	31	19	28	19	713	82.1	5.87	41.82	105.8	108.9	107.2	92.5	92.3	93.4	1.15708	0.000109085	12333
P70335	Rock1	Rho-associated protein kinase 1 OS=Mus musculus OX=10090 GN=Rock1 PE=1 SV=1	17	25	31	22	1354	158.1	5.86	50.5	100.3	102	101.6	101	96.5	98.6	1.02634	0.136352	19877
P50580	Pa2g4	Proliferation-associated protein 2G4 OS=Mus musculus OX=10090 GN=Pa2g4 PE=1 SV=3	33	11	29	11	394	43.7	6.86	61.95	103.3	101.2	103.5	97.7	94.4	99.9	1.05479	0.038731	18813
O88844	Idh1	Isocitrate dehydrogenase [NADP] cytoplasmic OS=Mus musculus OX=10090 GN=Idh1 PE=1 SV=2	40	16	30	16	414	46.6	7.17	53.59	113.1	111.7	114.1	85.2	88.8	87.1	1.29797	3.20144e-05	15926
Q8JZQ9	Eif3b	Eukaryotic translation initiation factor 3 subunit B OS=Mus musculus OX=10090 GN=Eif3b PE=1 SV=1	21	15	27	15	803	91.3	5.02	58.21	108.1	109.3	106.1	88.6	95.7	92.2	1.16998	0.00224418	27979
A2A5R2	Arfgef2	Brefeldin A-inhibited guanine nucleotide-exchange protein 2 OS=Mus musculus OX=10090 GN=Arfgef2 PE=1 SV=1	16	25	27	16	1792	202.1	6.55	41.07	103.6	106.2	104.1	93.3	102.2	90.5	1.09755	0.0618549	99371
O70145	Ncf2	Neutrophil cytosol factor 2 OS=Mus musculus OX=10090 GN=Ncf2 PE=1 SV=1	31	16	24	16	525	59.4	6.61	43.22	139.3	135.9	134.9	59.4	66.8	63.6	2.1607	8.29258e-06	17970
O54988	Slk	STE20-like serine/threonine-protein kinase OS=Mus musculus OX=10090 GN=Slk PE=1 SV=2	18	21	28	20	1233	141.4	5.14	44.9	94.8	97	97.7	102.4	102.2	106	0.932067	0.00966135	20874
Q922B2	Dars	Aspartate--tRNA ligase, cytoplasmic OS=Mus musculus OX=10090 GN=Dars PE=1 SV=2	43	19	26	19	501	57.1	6.49	58.76	105.3	105.4	107.2	96.8	91.4	93.9	1.12691	0.00206562	226414
P24270	Cat	Catalase OS=Mus musculus OX=10090 GN=Cat PE=1 SV=4	37	16	31	16	527	59.8	7.88	52.52	88.9	95.1	93.9	104.3	111.6	106.2	0.862776	0.00704197	12359
E9Q456	Tpm1	Tropomyosin alpha-1 chain OS=Mus musculus OX=10090 GN=Tpm1 PE=1 SV=1	41	12	29	0	248	28.7	4.77	54.49							#DIV/0!	#DIV/0!	22003
G5E8R2	Tpm1	Tropomyosin 1, alpha, isoform CRA_k OS=Mus musculus OX=10090 GN=Tpm1 PE=1 SV=1	39	12	29	0	248	28.7	4.78	55.7	88.3	90	95.4	107.9	113.7	104.6	0.839056	0.0068579	22003
Q9DCW4	Etfb	Electron transfer flavoprotein subunit beta OS=Mus musculus OX=10090 GN=Etfb PE=1 SV=3	49	12	29	12	255	27.6	8.1	67.18	95.6	95.2	95.4	104.5	104.6	104.7	0.912046	2.32342e-07	110826
Q8BX70	Vps13c	Vacuolar protein sorting-associated protein 13C OS=Mus musculus OX=10090 GN=Vps13c PE=1 SV=2	8	28	31	28	3748	419.8	6.81	37	99	106.8	104.7	96.8	97.6	95.2	1.07217	0.0458645	320528
Q00623	Apoa1	Apolipoprotein A-I OS=Mus musculus OX=10090 GN=Apoa1 PE=1 SV=2	50	16	52	16	264	30.6	5.73	94.76	96.3	95.9	97.3	104.9	100.7	105	0.932067	0.00888977	11806
O88322	Nid2	Nidogen-2 OS=Mus musculus OX=10090 GN=Nid2 PE=1 SV=2	15	20	27	19	1403	153.8	5.38	51.31	92.8	97.7	96	105.1	104	104.4	0.913876	0.0036227	18074
Q9DB77	Uqcrc2	Cytochrome b-c1 complex subunit 2, mitochondrial OS=Mus musculus OX=10090 GN=Uqcrc2 PE=1 SV=1	36	14	28	14	453	48.2	9.25	66	97.9	101.3	98.7	101.5	100.1	100.5	0.986097	0.274855	67003
O88569	Hnrnpa2b1	Heterogeneous nuclear ribonucleoproteins A2/B1 OS=Mus musculus OX=10090 GN=Hnrnpa2b1 PE=1 SV=2	42	16	33	14	353	37.4	8.95	57.36	102.6	102.8	106.6	96.4	96	95.6	1.08333	0.00375884	53379
E9PXX7	Txndc5	Thioredoxin domain-containing protein 5 OS=Mus musculus OX=10090 GN=Txndc5 PE=1 SV=1	46	13	26	13	344	38.5	5.39	55.85	158.1	146.3	151.4	46.3	49.2	48.6	3.16308	7.92651e-06	105245
Q02788	Col6a2	Collagen alpha-2(VI) chain OS=Mus musculus OX=10090 GN=Col6a2 PE=1 SV=3	18	17	30	17	1034	110.3	6.42	43.64	90.6	87.9	91.6	110.4	102.6	116.9	0.818733	0.00960009	12834
Q5I2A0	Serpina3g	Serine protease inhibitor A3G OS=Mus musculus OX=10090 GN=Serpina3g PE=1 SV=2	32	12	20	6	440	49	6.46	51.12	132.5	131.6	131.6	64.6	71	68.7	1.93686	4.64849e-06	20715
Q9WVE8	Pacsin2	Protein kinase C and casein kinase substrate in neurons protein 2 OS=Mus musculus OX=10090 GN=Pacsin2 PE=1 SV=1	41	19	32	19	486	55.8	5.2	42.18	94.3	92.4	92.3	104.5	110.2	106.4	0.868888	0.00145258	23970
E9Q3Z5	Svil	Supervillin OS=Mus musculus OX=10090 GN=Svil PE=1 SV=1	13	21	27	21	2056	230.3	6.62	36.42	88.8	90.8	89.7	109.7	112.2	108.9	0.814087	5.81688e-05	225115
P29351	Ptpn6	Tyrosine-protein phosphatase non-receptor type 6 OS=Mus musculus OX=10090 GN=Ptpn6 PE=1 SV=2	35	21	32	21	595	67.5	7.81	60.51	132	129.5	132	64.7	76	65.8	1.90557	7.21976e-05	15170
Q8BHN3	Ganab	Neutral alpha-glucosidase AB OS=Mus musculus OX=10090 GN=Ganab PE=1 SV=1	21	19	30	19	944	106.8	6.06	48.18	107.6	108.9	108.4	91.7	90	93.4	1.18103	9.42353e-05	14376
E9PYF1	Rnpep	Aminopeptidase B OS=Mus musculus OX=10090 GN=Rnpep PE=1 SV=1	30	16	24	16	611	68	5.5	48.62	106.2	108.3	106.2	94.3	99.2	85.8	1.14823	0.0255766	215615
Q9EPU0	Upf1	Regulator of nonsense transcripts 1 OS=Mus musculus OX=10090 GN=Upf1 PE=1 SV=2	20	21	27	21	1124	123.9	6.61	37.54	108.9	108.5	109.4	92.8	90.3	90	1.19663	4.20285e-05	19704
Q99KC8	Vwa5a	von Willebrand factor A domain-containing protein 5A OS=Mus musculus OX=10090 GN=Vwa5a PE=1 SV=2	22	17	31	17	793	87.1	6.58	49.16	102.1	99.5	101.8	100.7	99.6	96.3	1.02293	0.219	67776
G5E924	Hnrnpl	Heterogeneous nuclear ribonucleoprotein L (Fragment) OS=Mus musculus OX=10090 GN=Hnrnpl PE=1 SV=1	40	18	27	18	615	66.9	8.18	43.79	102.9	102.7	103.7	96.4	98.1	96.2	1.06398	0.000783694	15388
P07758	Serpina1a	Alpha-1-antitrypsin 1-1 OS=Mus musculus OX=10090 GN=Serpina1a PE=1 SV=4	24	12	26	6	413	46	5.72	43.24	80.2	80.6	79	117.4	124.8	118	0.665741	7.75872e-05	20700
P06800	Ptprc	Receptor-type tyrosine-protein phosphatase C OS=Mus musculus OX=10090 GN=Ptprc PE=1 SV=4	14	18	28	18	1293	144.7	5.94	42.44	136.4	133.8	134.5	64.6	65.8	64.9	2.0722	1.35799e-07	19264
Q61235	Sntb2	Beta-2-syntrophin OS=Mus musculus OX=10090 GN=Sntb2 PE=1 SV=2	33	15	27	13	520	56.3	8.69	52.86	89.6	94.6	92.8	107.9	110	105.1	0.857585	0.00166989	20650
Q64521	Gpd2	Glycerol-3-phosphate dehydrogenase, mitochondrial OS=Mus musculus OX=10090 GN=Gpd2 PE=1 SV=2	24	19	27	19	727	80.9	6.61	55.99	104.5	103.8	102.8	95.9	96.3	96.7	1.07684	0.000169917	14571
P33267	Cyp2f2	Cytochrome P450 2F2 OS=Mus musculus OX=10090 GN=Cyp2f2 PE=1 SV=1	25	11	31	11	491	55.9	7.9	48.64	77.2	76.6	78.7	125.1	117.6	124.7	0.632825	5.74951e-05	13107
A2AEX6	Fhl1	Four and a half LIM domains protein 1 OS=Mus musculus OX=10090 GN=Fhl1 PE=1 SV=1	51	14	26	14	309	35.1	8.44	51.09	75.8	75.4	77.2	122.3	127.4	121.8	0.614805	1.40443e-05	14199
Q7TSV4	Pgm2	Phosphoglucomutase-2 OS=Mus musculus OX=10090 GN=Pgm2 PE=1 SV=1	25	15	24	15	620	68.7	6.14	52.53	97.5	97.5	97.2	105.1	100.9	101.8	0.949318	0.0153422	66681
P27659	Rpl3	60S ribosomal protein L3 OS=Mus musculus OX=10090 GN=Rpl3 PE=1 SV=3	49	22	34	22	403	46.1	10.21	68.83	104.1	102.2	102.9	97.1	96.5	97.3	1.06291	0.000543022	27367
P17742	Ppia	Peptidyl-prolyl cis-trans isomerase A OS=Mus musculus OX=10090 GN=Ppia PE=1 SV=2	66	12	48	11	164	18	7.9	87.95	112.1	110.9	110.2	89.2	87.6	90	1.24888	1.60476e-05	268373
Q9QZQ8	H2afy	Core histone macro-H2A.1 OS=Mus musculus OX=10090 GN=H2afy PE=1 SV=3	41	14	31	13	372	39.7	9.8	64.15	101.3	100.6	103.2	101	98	95.8	1.03494	0.112845	-
P19324	Serpinh1	Serpin H1 OS=Mus musculus OX=10090 GN=Serpinh1 PE=1 SV=3	31	11	24	11	417	46.5	8.82	43.26	106.4	107.6	104.7	92.6	96.9	91.8	1.13295	0.00224912	12406
Q99MN9	Pccb	Propionyl-CoA carboxylase beta chain, mitochondrial OS=Mus musculus OX=10090 GN=Pccb PE=1 SV=2	32	14	20	14	541	58.4	7.66	45.77	81.7	86.3	84.7	118.6	116.2	112.5	0.727613	0.000144772	66904
A0A087WS29	Ktn1	Kinectin OS=Mus musculus OX=10090 GN=Ktn1 PE=1 SV=1	20	22	25	22	1228	140.8	6.18	52.17	97.2	98.1	96.8	101.5	100.7	105.8	0.948377	0.0313059	16709
P10605	Ctsb	Cathepsin B OS=Mus musculus OX=10090 GN=Ctsb PE=1 SV=2	30	10	26	10	339	37.3	5.91	57.18	135.8	142.4	137.8	58.9	63.5	61.7	2.25964	5.25381e-06	13030
Q8K1M3	Prkar2a	Protein kinase, cAMP dependent regulatory, type II alpha OS=Mus musculus OX=10090 GN=Prkar2a PE=1 SV=1	30	11	30	9	402	45.6	4.93	52.73	91.1	91.2	91	110	107.4	109.2	0.836803	2.10144e-05	19087
G5E8R1	Tpm1	Tropomyosin 1, alpha, isoform CRA_j OS=Mus musculus OX=10090 GN=Tpm1 PE=1 SV=1	36	11	27	0	248	28.5	4.77	48.67							#DIV/0!	#DIV/0!	22003
E9Q1G8	Sept7	Septin-7 OS=Mus musculus OX=10090 GN=Sept7 PE=1 SV=2	33	16	28	14	437	50.6	8.57	58.36	100.2	95.4	97.2	103	101	103.3	0.952815	0.0373482	#N/A
Q61830	Mrc1	Macrophage mannose receptor 1 OS=Mus musculus OX=10090 GN=Mrc1 PE=1 SV=2	14	19	23	19	1456	164.9	6.83	39.25	121.5	122.8	122.3	75.6	78	79.7	1.57137	3.71574e-06	17533
Q99LX0	Park7	Protein/nucleic acid deglycase DJ-1 OS=Mus musculus OX=10090 GN=Park7 PE=1 SV=1	54	9	29	9	189	20	6.77	63.56	97.8	95.2	94	104.7	103.5	104.9	0.91664	0.00194383	57320
P97927	Lama4	Laminin subunit alpha-4 OS=Mus musculus OX=10090 GN=Lama4 PE=1 SV=2	11	18	26	18	1816	201.7	6.21	40.31	91	91.7	91.1	110.7	106.1	109.4	0.839362	0.000228504	16775
P14576	Srp54	Signal recognition particle 54 kDa protein OS=Mus musculus OX=10090 GN=Srp54 PE=1 SV=2	23	14	22	14	504	55.7	8.75	49.54	97.9	98.2	96.9	104.6	98.8	103.6	0.954397	0.0635546	-
P14148	Rpl7	60S ribosomal protein L7 OS=Mus musculus OX=10090 GN=Rpl7 PE=1 SV=2	41	17	32	17	270	31.4	10.89	57.2	100.5	94.6	98.4	102.9	100.7	102.9	0.957586	0.0820288	19989
P08752	Gnai2	Guanine nucleotide-binding protein G(i) subunit alpha-2 OS=Mus musculus OX=10090 GN=Gnai2 PE=1 SV=5	43	14	28	6	355	40.5	5.45	53.6	100.3	101.6	100	98.1	106.2	93.7	1.01309	0.742624	14678
Q3U367	Aldh9a1	4-trimethylaminobutyraldehyde dehydrogenase OS=Mus musculus OX=10090 GN=Aldh9a1 PE=1 SV=1	33	14	24	14	518	55.9	7.46	51.26	108.8	103	103.2	96.3	93.5	95.2	1.10526	0.00842715	56752
Q99MR8	Mccc1	Methylcrotonoyl-CoA carboxylase subunit alpha, mitochondrial OS=Mus musculus OX=10090 GN=Mccc1 PE=1 SV=2	25	14	18	14	717	79.3	7.83	36.73	90	89.7	92.6	111.3	104.7	111.6	0.831197	0.00162644	72039
P01900	H2-D1	H-2 class I histocompatibility antigen, D-D alpha chain OS=Mus musculus OX=10090 GN=H2-D1 PE=1 SV=1	35	13	30	8	365	41.1	6.65	50.19	117.5	118.6	121	83	76.4	83.4	1.47076	0.000107047	14964
G3UX26	Vdac2	Voltage-dependent anion-selective channel protein 2 OS=Mus musculus OX=10090 GN=Vdac2 PE=1 SV=1	42	11	28	11	283	30.4	7.58	58.38	105.1	104.7	106.5	95.6	93.2	94.9	1.11491	0.000266968	22334
P84091	Ap2m1	AP-2 complex subunit mu OS=Mus musculus OX=10090 GN=Ap2m1 PE=1 SV=1	34	14	29	14	435	49.6	9.54	54.18	103.1	102.5	104.8	99.6	93	96.9	1.07219	0.0267288	11773
P50285	Fmo1	Dimethylaniline monooxygenase [N-oxide-forming] 1 OS=Mus musculus OX=10090 GN=Fmo1 PE=1 SV=1	27	14	26	14	532	59.9	8.47	51.73	78.5	77.8	79.4	125.8	116.7	121.8	0.646994	8.85052e-05	14261
Q02248	Ctnnb1	Catenin beta-1 OS=Mus musculus OX=10090 GN=Ctnnb1 PE=1 SV=1	19	14	25	12	781	85.4	5.86	54.19	90.7	88.4	87.7	110.6	110	112.6	0.80072	5.07647e-05	12387
P50544	Acadvl	Very long-chain specific acyl-CoA dehydrogenase, mitochondrial OS=Mus musculus OX=10090 GN=Acadvl PE=1 SV=3	32	17	28	17	656	70.8	8.75	40.99	99.6	99.7	100.3	97.4	105.1	97.8	0.997669	0.930465	11370
P14685	Psmd3	26S proteasome non-ATPase regulatory subunit 3 OS=Mus musculus OX=10090 GN=Psmd3 PE=1 SV=3	37	18	25	18	530	60.7	8.44	44.5	107.1	108.9	107.6	89.1	95.6	91.8	1.17034	0.0013179	22123
Q76MZ3	Ppp2r1a	Serine/threonine-protein phosphatase 2A 65 kDa regulatory subunit A alpha isoform OS=Mus musculus OX=10090 GN=Ppp2r1a PE=1 SV=3	30	15	29	13	589	65.3	5.11	45.65	102.5	105.1	107	95.6	92.1	97.8	1.10193	0.0100659	51792
Q64105	Spr	Sepiapterin reductase OS=Mus musculus OX=10090 GN=Spr PE=1 SV=1	49	11	23	11	261	27.9	5.74	39.19	96.8	91	91.3	108	105	107.9	0.869741	0.00280564	20751
Q3UID0	Smarcc2	SWI/SNF complex subunit SMARCC2 OS=Mus musculus OX=10090 GN=Smarcc2 PE=1 SV=1	21	18	27	13	1130	124.6	5.47	48.4	102	104.6	102.9	94.1	99.2	97.3	1.06504	0.0196391	68094
Q9D8E6	Rpl4	60S ribosomal protein L4 OS=Mus musculus OX=10090 GN=Rpl4 PE=1 SV=3	35	13	24	13	419	47.1	11	57.9	98.7	98.3	100.4	102.7	97.9	102	0.982816	0.347431	67891
Q8BKC5	Ipo5	Importin-5 OS=Mus musculus OX=10090 GN=Ipo5 PE=1 SV=3	15	16	24	16	1097	123.5	4.93	36.45	108.7	105.9	107.1	91.9	92.3	94	1.15636	0.000150878	70572
P70704	Atp8a1	Phospholipid-transporting ATPase IA OS=Mus musculus OX=10090 GN=Atp8a1 PE=1 SV=2	18	18	22	18	1164	131.3	6.84	38.79	97.5	97.5	98.6	101.6	98.2	106.6	0.958225	0.158762	11980
Q91WP6	Serpina3n	Serine protease inhibitor A3N OS=Mus musculus OX=10090 GN=Serpina3n PE=1 SV=1	29	10	20	6	418	46.7	5.82	46.89	67.4	68.3	64.8	134	128.8	136.7	0.501877	1.28685e-05	20716
P61982	Ywhag	14-3-3 protein gamma OS=Mus musculus OX=10090 GN=Ywhag PE=1 SV=2	42	11	32	5	247	28.3	4.89	68.34	114	110.2	108.9	88.2	88.7	90.1	1.24757	0.000174308	22628
Q3TRM8	Hk3	Hexokinase-3 OS=Mus musculus OX=10090 GN=Hk3 PE=1 SV=2	20	16	25	16	922	100	5.94	42.18	134.8	132.4	134.1	67.1	64.5	67	2.02064	4.35547e-07	212032
G5E829	Atp2b1	Plasma membrane calcium-transporting ATPase 1 OS=Mus musculus OX=10090 GN=Atp2b1 PE=1 SV=1	17	17	21	13	1220	134.7	5.91	36.58	94.8	95.4	95	110.1	99.6	105.1	0.905972	0.0314222	67972
Q922F4	Tubb6	Tubulin beta-6 chain OS=Mus musculus OX=10090 GN=Tubb6 PE=1 SV=1	33	13	33	4	447	50.1	4.89	44.96	101	103.3	105.6	97.3	99.7	93.1	1.06825	0.0479	67951
O88685	Psmc3	26S proteasome regulatory subunit 6A OS=Mus musculus OX=10090 GN=Psmc3 PE=1 SV=2	38	15	25	15	442	49.5	5.19	53.38	108	108.8	106.6	90.8	93.3	92.5	1.1692	9.03394e-05	19182
Q60847	Col12a1	Collagen alpha-1(XII) chain OS=Mus musculus OX=10090 GN=Col12a1 PE=2 SV=3	8	23	28	23	3120	340	5.64	42.65	102	108.4	99.9	92.8	104	92.9	1.07111	0.202613	12816
P35441	Thbs1	Thrombospondin-1 OS=Mus musculus OX=10090 GN=Thbs1 PE=1 SV=1	17	21	27	20	1170	129.6	4.96	48.72	77.8	77.8	77	124.2	124.6	118.7	0.632925	1.97886e-05	21825
Q5BKQ4	Pnliprp1	Inactive pancreatic lipase-related protein 1 OS=Mus musculus OX=10090 GN=Pnliprp1 PE=1 SV=2	44	16	31	15	473	52.7	6.34	53.59	36.1	38.1	38.4	159.4	168.8	159.3	0.230974	2.67185e-06	18946
Q921G7	Etfdh	Electron transfer flavoprotein-ubiquinone oxidoreductase, mitochondrial OS=Mus musculus OX=10090 GN=Etfdh PE=1 SV=1	29	16	25	16	616	68	7.58	47.98	101.4	100.2	98.4	98.4	103.4	98.2	1	1	66841
Q11011	Npepps	Puromycin-sensitive aminopeptidase OS=Mus musculus OX=10090 GN=Npepps PE=1 SV=2	21	18	29	17	920	103.3	5.9	49.56	105.1	105.1	103.4	95.5	96.8	94.1	1.09497	0.00071164	19155
P84096	Rhog	Rho-related GTP-binding protein RhoG OS=Mus musculus OX=10090 GN=Rhog PE=1 SV=1	59	9	22	8	191	21.3	8.12	44.17	110.4	103.2	111.1	91.2	93.1	91	1.17944	0.00323617	56212
G5E866	Sf3b1	Splicing factor 3B subunit 1 OS=Mus musculus OX=10090 GN=Sf3b1 PE=1 SV=1	17	20	23	20	1304	145.7	7.09	37.49	103.4	104.8	105.8	96.6	94	95.3	1.09829	0.000791662	81898
E9Q1S3	Sec23a	Protein transport protein Sec23A OS=Mus musculus OX=10090 GN=Sec23a PE=1 SV=1	26	17	25	16	736	82.9	7.46	44.46	108.9	109.3	110.8	90.1	88	93	1.21357	0.000245709	20334
P50516	Atp6v1a	V-type proton ATPase catalytic subunit A OS=Mus musculus OX=10090 GN=Atp6v1a PE=1 SV=2	20	13	23	13	617	68.3	5.58	56.25	123	120.6	121.7	78.4	77.7	78.6	1.55646	5.14601e-07	11964
Q08093	Cnn2	Calponin-2 OS=Mus musculus OX=10090 GN=Cnn2 PE=1 SV=1	33	10	23	8	305	33.1	7.62	48.87	90.6	88.5	91.5	108.1	111.7	109.6	0.821494	0.000139125	12798
A0A0R4J107	Apeh	Acylamino-acid-releasing enzyme (Fragment) OS=Mus musculus OX=10090 GN=Apeh PE=1 SV=1	22	14	20	14	716	79.8	5.59	34.79	101	104.5	103.1	93.2	100.7	97.4	1.05939	0.0738719	235606
P37804	Tagln	Transgelin OS=Mus musculus OX=10090 GN=Tagln PE=1 SV=3	60	12	25	12	201	22.6	8.81	46.13	80.1	78.3	77	123.3	120.9	120.4	0.645639	4.48881e-06	21345
Q9Z1Q5	Clic1	Chloride intracellular channel protein 1 OS=Mus musculus OX=10090 GN=Clic1 PE=1 SV=3	57	13	22	12	241	27	5.17	43.61	113.7	110.6	112.8	89.2	81.9	91.7	1.28272	0.00129955	114584
P97807	Fh	Fumarate hydratase, mitochondrial OS=Mus musculus OX=10090 GN=Fh PE=1 SV=3	27	12	24	12	507	54.3	9.04	36.9	99.3	101.7	102.1	96.3	102.2	98.3	1.02123	0.340046	-
P01897	H2-L	H-2 class I histocompatibility antigen, L-D alpha chain OS=Mus musculus OX=10090 GN=H2-L PE=1 SV=2	38	12	27	7	362	40.7	6.25	41.62	124.2	124.5	124.1	74.1	77.3	75.8	1.64085	8.14427e-07	-
Q9CWJ9	Atic	Bifunctional purine biosynthesis protein PURH OS=Mus musculus OX=10090 GN=Atic PE=1 SV=2	32	14	25	14	592	64.2	6.76	40.91	103.5	112.3	110.4	90.3	92.4	91.1	1.19138	0.00311736	108147
Q91XV3	Basp1	Brain acid soluble protein 1 OS=Mus musculus OX=10090 GN=Basp1 PE=1 SV=3	69	10	22	10	226	22.1	4.51	38.63	141.3	142	136.3	57.2	64	59.2	2.32594	7.83425e-06	70350
P01837	Igkc	Immunoglobulin kappa constant OS=Mus musculus OX=10090 GN=Igkc PE=1 SV=2	81	6	53	6	107	11.9	5.9	89.05	127.2	128.5	129.7	69.7	73.2	71.7	1.7959	1.36566e-06	-
Q99K48	Nono	Non-POU domain-containing octamer-binding protein OS=Mus musculus OX=10090 GN=Nono PE=1 SV=3	37	17	28	15	473	54.5	8.95	57.41	110	111.1	110.2	87.6	91.1	90	1.23297	4.34427e-05	53610
P58871	Tnks1bp1	182 kDa tankyrase-1-binding protein OS=Mus musculus OX=10090 GN=Tnks1bp1 PE=1 SV=2	17	19	23	19	1720	181.7	4.88	28.53	91.8	92.7	93.1	109.1	104.9	108.4	0.861042	0.00038512	228140
Q9WTP7	Ak3	GTP:AMP phosphotransferase AK3, mitochondrial OS=Mus musculus OX=10090 GN=Ak3 PE=1 SV=3	57	12	17	12	227	25.4	8.84	39.56	87.2	84.6	83	119.2	109.3	116.8	0.737909	0.000725672	56248
A2AGT5	Ckap5	Cytoskeleton-associated protein 5 OS=Mus musculus OX=10090 GN=Ckap5 PE=1 SV=1	13	25	27	25	2032	225.5	7.96	21.41	102	104.5	104.2	94.9	97	97.3	1.07434	0.00278264	75786
Q9CR35	Ctrb1	Chymotrypsinogen B OS=Mus musculus OX=10090 GN=Ctrb1 PE=1 SV=1	40	7	34	7	263	27.8	5.07	56.78	29	28.6	30	181.3	157.6	173.5	0.17096	3.4977e-05	66473
Q99PT1	Arhgdia	Rho GDP-dissociation inhibitor 1 OS=Mus musculus OX=10090 GN=Arhgdia PE=1 SV=3	44	9	32	9	204	23.4	5.2	57.75	103.6	101.4	101.8	96.7	97.2	99.3	1.04638	0.0122749	192662
P04919	Slc4a1	Band 3 anion transport protein OS=Mus musculus OX=10090 GN=Slc4a1 PE=1 SV=1	18	12	24	12	929	103.1	5.45	47.2	80.7	81.8	81.2	115.9	123.7	116.6	0.684166	0.000117234	20533
F6RPJ9	Ide	Insulin-degrading enzyme (Fragment) OS=Mus musculus OX=10090 GN=Ide PE=1 SV=1	19	18	28	18	987	114.2	6.27	36.44	105.3	106.9	103.8	94.1	96.6	93.3	1.11268	0.00133967	15925
P80316	Cct5	T-complex protein 1 subunit epsilon OS=Mus musculus OX=10090 GN=Cct5 PE=1 SV=1	26	15	25	14	541	59.6	6.02	38.66	113.7	109.7	107.7	90	89.5	89.4	1.23131	0.000306179	12465
Q8VIJ6	Sfpq	Splicing factor, proline- and glutamine-rich OS=Mus musculus OX=10090 GN=Sfpq PE=1 SV=1	25	15	23	14	699	75.4	9.44	49.14	106.9	106.7	105.8	92.2	96.7	91.8	1.13787	0.00130658	71514
Q3UW53	Fam129a	Protein Niban OS=Mus musculus OX=10090 GN=Fam129a PE=1 SV=2	20	16	22	16	926	102.6	4.78	29.55	94.1	96	97.8	103.1	102.2	106.8	0.922461	0.010298	-
Q91ZA3	Pcca	Propionyl-CoA carboxylase alpha chain, mitochondrial OS=Mus musculus OX=10090 GN=Pcca PE=1 SV=2	26	16	22	16	724	79.9	7.25	45.8	85.1	88	87.9	111	115	113	0.769912	6.426e-05	110821
O08749	Dld	Dihydrolipoyl dehydrogenase, mitochondrial OS=Mus musculus OX=10090 GN=Dld PE=1 SV=2	26	12	25	12	509	54.2	7.9	40.89	99.8	96.6	96.4	102.4	100.8	103.9	0.953435	0.0283459	13382
P42125	Eci1	Enoyl-CoA delta isomerase 1, mitochondrial OS=Mus musculus OX=10090 GN=Eci1 PE=1 SV=2	35	10	22	10	289	32.2	8.98	53.47	97.3	99	97.6	100.2	104.4	101.4	0.960458	0.0408231	13177
Q9R0P5	Dstn	Destrin OS=Mus musculus OX=10090 GN=Dstn PE=1 SV=3	61	13	32	12	165	18.5	7.97	56.85	102.3	96.6	101.7	103.8	92.6	103.1	1.00367	0.932191	56431
P16627	Hspa1l	Heat shock 70 kDa protein 1-like OS=Mus musculus OX=10090 GN=Hspa1l PE=1 SV=4	23	15	36	1	641	70.6	6.24	72.96							#DIV/0!	#DIV/0!	15482
Q9D8U8	Snx5	Sorting nexin-5 OS=Mus musculus OX=10090 GN=Snx5 PE=1 SV=1	45	16	24	16	404	46.8	6.62	38.03	116.2	115.7	116.2	82.6	84.9	84.3	1.38245	1.42074e-06	69178
A2A7S7	Yars	Tyrosine--tRNA ligase OS=Mus musculus OX=10090 GN=Yars PE=1 SV=1	31	18	26	18	564	63	8.44	50.83	105.8	103.9	104.6	97.3	95.4	93.1	1.09972	0.00206093	107271
Q7TMB8	Cyfip1	Cytoplasmic FMR1-interacting protein 1 OS=Mus musculus OX=10090 GN=Cyfip1 PE=1 SV=1	16	17	24	10	1253	145.1	6.9	39.13	99.2	99.7	102.2	101.5	96.3	101.2	1.00702	0.734418	20430
E9Q3Y4	Lrba	Lipopolysaccharide-responsive and beige-like anchor protein OS=Mus musculus OX=10090 GN=Lrba PE=1 SV=1	9	22	24	19	2854	316.6	5.54	36.48	103.4	108.9	105.2	90.7	98.1	93.7	1.12389	0.0122895	80877
Q9R1P4	Psma1	Proteasome subunit alpha type-1 OS=Mus musculus OX=10090 GN=Psma1 PE=1 SV=1	36	9	22	9	263	29.5	6.46	50.93	118.5	112.2	117	85.7	81.2	85.4	1.37812	0.000184941	26440
Q8BZF8	Pgm5	Phosphoglucomutase-like protein 5 OS=Mus musculus OX=10090 GN=Pgm5 PE=1 SV=2	29	16	23	15	567	62.2	7.18	39.67	86.4	87.2	89.5	114.6	106.7	115.5	0.781176	0.00112995	226041
Q8R1F1	Fam129b	Niban-like protein 1 OS=Mus musculus OX=10090 GN=Fam129b PE=1 SV=2	25	17	24	17	749	84.8	5.94	38.19	99.7	98.2	100.8	104	95	102.3	0.991371	0.777095	-
Q8BW75	Maob	Amine oxidase [flavin-containing] B OS=Mus musculus OX=10090 GN=Maob PE=1 SV=4	32	16	28	13	520	58.5	8.29	55.53	95.8	93	93	106.7	104.8	106.7	0.885607	0.000423391	109731
Q9CPV4	Glod4	Glyoxalase domain-containing protein 4 OS=Mus musculus OX=10090 GN=Glod4 PE=1 SV=1	52	15	29	15	298	33.3	5.47	51.23	102.3	99	98.8	99.4	100.2	100.3	1.00067	0.957294	67201
Q9D0R2	Tars	Threonine--tRNA ligase, cytoplasmic OS=Mus musculus OX=10090 GN=Tars PE=1 SV=2	27	18	22	18	722	83.3	7.36	37.22	91.2	125.1	88.7	99.2	94.4	101.4	1.0339	0.793607	110960
Q8R429	Atp2a1	Sarcoplasmic/endoplasmic reticulum calcium ATPase 1 OS=Mus musculus OX=10090 GN=Atp2a1 PE=1 SV=1	16	17	27	4	994	109.4	5.22	43.97	91.9	92.2	89.5	111	102.5	112.8	0.838492	0.00592142	11937
P01902	H2-K1	H-2 class I histocompatibility antigen, K-D alpha chain OS=Mus musculus OX=10090 GN=H2-K1 PE=1 SV=1	41	12	25	7	368	41.5	6.62	48.98	122.5	121.9	123.2	73.4	82.5	76.5	1.58176	7.51901e-05	14972
P49312	Hnrnpa1	Heterogeneous nuclear ribonucleoprotein A1 OS=Mus musculus OX=10090 GN=Hnrnpa1 PE=1 SV=2	33	11	23	6	320	34.2	9.23	51.42	115.9	108.1	111.9	83.7	89.9	90.6	1.27139	0.00160506	15382
Q60931	Vdac3	Voltage-dependent anion-selective channel protein 3 OS=Mus musculus OX=10090 GN=Vdac3 PE=1 SV=1	42	10	22	9	283	30.7	8.79	43.01	105.2	98.3	102.3	100.6	94.3	99.2	1.03978	0.231308	22335
Q9D6Z1	Nop56	Nucleolar protein 56 OS=Mus musculus OX=10090 GN=Nop56 PE=1 SV=2	32	14	23	14	580	64.4	9.14	41.25	99.7	98.2	99.6	99.6	101.7	101.2	0.983471	0.104759	67134
P03958	Ada	Adenosine deaminase OS=Mus musculus OX=10090 GN=Ada PE=1 SV=3	36	11	22	11	352	40	5.72	45.34	118	113.7	119.4	83.4	79.4	86	1.41117	0.000187611	11486
Q8BTU6	Eif4a2	Eukaryotic initiation factor 4A-II OS=Mus musculus OX=10090 GN=Eif4a2 PE=1 SV=1	31	11	18	3	362	41.3	5.64	39.1	96.7	90.7	95.1	105.2	103.1	109.2	0.889764	0.00999421	13682
P25911	Lyn	Tyrosine-protein kinase Lyn OS=Mus musculus OX=10090 GN=Lyn PE=1 SV=4	32	13	22	12	512	58.8	7.15	35.71	99.5	101.8	101.1	98.5	101.7	97.4	1.01613	0.334185	17096
P31725	S100a9	Protein S100-A9 OS=Mus musculus OX=10090 GN=S100a9 PE=1 SV=3	54	9	79	9	113	13	7.17	129.25	147.2	146.4	143.8	50.6	58.2	53.8	2.69004	2.9595e-06	20202
Q62523	Zyx	Zyxin OS=Mus musculus OX=10090 GN=Zyx PE=1 SV=2	35	13	28	13	564	60.5	6.4	43.11	84.5	88.7	88.9	114	108.6	115.3	0.775673	0.000541981	22793
P06801	Me1	NADP-dependent malic enzyme OS=Mus musculus OX=10090 GN=Me1 PE=1 SV=2	28	14	25	14	572	63.9	7.44	49.15	112.7	112.3	112.5	86.4	88.5	87.6	1.28571	2.24787e-06	17436
Q9CQ19	Myl9	Myosin regulatory light polypeptide 9 OS=Mus musculus OX=10090 GN=Myl9 PE=1 SV=3	56	7	31	3	172	19.8	4.92	43.55	91.3	102.7	95.9	103.4	104.6	102.1	0.93486	0.117881	98932
Q91VC4	Plvap	Plasmalemma vesicle-associated protein OS=Mus musculus OX=10090 GN=Plvap PE=1 SV=1	39	17	24	16	438	49.9	8.4	36.21	75.5	83.5	76.7	125.7	118.4	120.2	0.646994	0.000207634	84094
Q8C1B7	Sept11	Septin-11 OS=Mus musculus OX=10090 GN=Sept11 PE=1 SV=4	30	12	27	5	431	49.7	6.68	42.55	101.5	97.6	98.6	100	102.3	100	0.984783	0.334449	#N/A
Q921M3	Sf3b3	Splicing factor 3B subunit 3 OS=Mus musculus OX=10090 GN=Sf3b3 PE=1 SV=1	15	15	26	15	1217	135.5	5.26	43.4	114.3	109.6	112.7	89	83.8	90.7	1.27742	0.000613209	101943
P51881	Slc25a5	ADP/ATP translocase 2 OS=Mus musculus OX=10090 GN=Slc25a5 PE=1 SV=3	38	14	30	8	298	32.9	9.73	60.95	104.6	104	102.4	96.9	97.8	94.3	1.07612	0.00406717	11740
Q91VR5	Ddx1	ATP-dependent RNA helicase DDX1 OS=Mus musculus OX=10090 GN=Ddx1 PE=1 SV=1	34	22	29	22	740	82.4	7.21	48.81	106.4	105.1	112.6	95.7	86.1	94.1	1.1747	0.0129725	104721
Q9Z1T1	Ap3b1	AP-3 complex subunit beta-1 OS=Mus musculus OX=10090 GN=Ap3b1 PE=1 SV=2	14	17	24	17	1105	122.7	5.66	36.63	108.1	111	108.4	89.5	90.9	92.1	1.20183	0.00010302	11774
P27046	Man2a1	Alpha-mannosidase 2 OS=Mus musculus OX=10090 GN=Man2a1 PE=1 SV=2	18	18	24	18	1150	131.5	8.03	38.86	115	117.2	112.3	84.1	86.7	84.7	1.34834	5.23517e-05	17158
P32261	Serpinc1	Antithrombin-III OS=Mus musculus OX=10090 GN=Serpinc1 PE=1 SV=1	35	16	24	16	465	52	6.46	48.4	79.9	79.3	77.9	122.3	119.3	121.3	0.653348	2.46241e-06	11905
P01029	C4b	Complement C4-B OS=Mus musculus OX=10090 GN=C4b PE=1 SV=3	10	16	21	16	1738	192.8	7.53	38.86	94	90.9	93.8	109.2	105.3	106.7	0.867684	0.000733971	12268
Q9Z2I8	Suclg2	Succinate--CoA ligase [GDP-forming] subunit beta, mitochondrial OS=Mus musculus OX=10090 GN=Suclg2 PE=1 SV=3	35	14	17	14	433	46.8	7.02	35.42	91	91.3	91.6	108.1	108.7	109.4	0.839669	1.89477e-06	20917
Q9QXY6	Ehd3	EH domain-containing protein 3 OS=Mus musculus OX=10090 GN=Ehd3 PE=1 SV=2	26	14	27	6	535	60.8	6.46	46.18	88.2	88.2	90.9	120.4	89.5	122.9	0.803185	0.112773	57440
Q9JHL1	Slc9a3r2	Na(+)/H(+) exchange regulatory cofactor NHE-RF2 OS=Mus musculus OX=10090 GN=Slc9a3r2 PE=1 SV=2	47	14	24	14	337	37.4	7.59	52.88	82.9	80.6	84	117.2	115.8	119.6	0.701929	1.96477e-05	65962
P62196	Psmc5	26S proteasome regulatory subunit 8 OS=Mus musculus OX=10090 GN=Psmc5 PE=1 SV=1	38	14	18	13	406	45.6	7.55	44.34	102.1	108.8	104.7	91.6	102.2	90.5	1.11009	0.0683086	19184
Q9WUM4	Coro1c	Coronin-1C OS=Mus musculus OX=10090 GN=Coro1c PE=1 SV=2	26	15	26	14	474	53.1	7.08	45.39	100.4	96.7	99.6	102.6	96.5	104.1	0.978562	0.448541	23790
Q6ZQ08	Cnot1	CCR4-NOT transcription complex subunit 1 OS=Mus musculus OX=10090 GN=Cnot1 PE=1 SV=2	9	19	25	19	2375	266.6	7.11	32.25	105	107.3	102.9	96.3	97.3	91.2	1.10674	0.0112348	234594
O89053	Coro1a	Coronin-1A OS=Mus musculus OX=10090 GN=Coro1a PE=1 SV=5	33	16	35	15	461	51	6.48	51.99	120.9	127.8	124.9	74.5	75.5	76.3	1.65091	1.86217e-05	12721
Q8C6B0	Mettl7a1	MCG20149, isoform CRA_a OS=Mus musculus OX=10090 GN=Mettl7a1 PE=1 SV=1	50	9	24	9	244	28.1	8.31	43.26	89.9	85.5	86.6	114.6	108.9	114.5	0.775148	0.000386977	70152
Q6A028	Swap70	Switch-associated protein 70 OS=Mus musculus OX=10090 GN=Swap70 PE=1 SV=2	30	16	20	16	585	69	6.05	47.43	106.4	106.4	105.7	96.2	90.8	94.6	1.13104	0.00160782	20947
Q07076	Anxa7	Annexin A7 OS=Mus musculus OX=10090 GN=Anxa7 PE=1 SV=2	34	16	27	16	463	49.9	6.18	56.51	103.7	104.8	105.6	94.9	92.2	98.8	1.09864	0.00920048	11750
Q8K4Z5	Sf3a1	Splicing factor 3A subunit 1 OS=Mus musculus OX=10090 GN=Sf3a1 PE=1 SV=1	20	14	20	14	791	88.5	5.22	45.86	104.4	103.1	106.4	92.9	96.5	96.7	1.09717	0.00406394	67465
Q8BFQ1	Psap	Prosaposin OS=Mus musculus OX=10090 GN=Psap PE=1 SV=1	29	15	23	15	554	61	5.24	40.79	127.1	127.3	128.3	69.3	72.5	75.5	1.76116	7.20092e-06	19156
P97384	Anxa11	Annexin A11 OS=Mus musculus OX=10090 GN=Anxa11 PE=1 SV=2	28	12	21	11	503	54	7.66	42.87	109.6	106.2	108.3	94.8	90.3	90.7	1.17513	0.000768813	11744
A2AMW0	Capzb	Capping protein (Actin filament) muscle Z-line, beta, isoform CRA_a OS=Mus musculus OX=10090 GN=Capzb PE=1 SV=1	47	13	30	13	260	29.3	6.92	46.92	115.4	112.1	115.4	85.4	84.8	86.8	1.33424	2.14802e-05	12345
P62821	Rab1A	Ras-related protein Rab-1A OS=Mus musculus OX=10090 GN=Rab1A PE=1 SV=3	56	12	24	6	205	22.7	6.21	44.25	104.2	104.3	103	93.4	100	95.1	1.07972	0.019245	19324
P51150	Rab7a	Ras-related protein Rab-7a OS=Mus musculus OX=10090 GN=Rab7a PE=1 SV=2	65	11	22	11	207	23.5	6.7	49.25	109.2	108.1	108.7	93.1	89.7	91.2	1.18978	7.41749e-05	-
A0A0G2JFY5	Fubp1	Far upstream element-binding protein 1 OS=Mus musculus OX=10090 GN=Fubp1 PE=1 SV=1	26	17	22	13	654	68.8	7.93	46.25	102.5	101.2	102.1	100	94.9	99.2	1.03978	0.0749035	51886
Q8CFX1	H6pd	GDH/6PGL endoplasmic bifunctional protein OS=Mus musculus OX=10090 GN=H6pd PE=1 SV=2	18	14	22	14	789	88.9	6.93	39.91	98.5	125.4	102.6	90.6	91	91.8	1.19422	0.102092	100198
Q05BC3	Eml1	Echinoderm microtubule-associated protein-like 1 OS=Mus musculus OX=10090 GN=Eml1 PE=1 SV=1	17	14	20	13	814	89.6	7.02	42.69	84.1	85.3	84.2	116.2	115.5	114.7	0.732102	7.36137e-07	68519
F8VQC1	Srp72	Signal recognition particle subunit SRP72 OS=Mus musculus OX=10090 GN=Srp72 PE=1 SV=1	23	13	21	13	671	74.6	9.23	36.47	102.1	103.1	106.1	99.1	90	99.8	1.07754	0.0915566	66661
O35744	Chil3	Chitinase-like protein 3 OS=Mus musculus OX=10090 GN=Chil3 PE=1 SV=2	32	12	29	8	398	44.4	5.69	47.35	138.1	143.1	134.9	57.9	64	62.1	2.26141	1.32558e-05	12655
Q9WUA2	Farsb	Phenylalanine--tRNA ligase beta subunit OS=Mus musculus OX=10090 GN=Farsb PE=1 SV=2	28	17	22	17	589	65.7	7.12	42.58	107.6	106.3	105.4	94.2	91.9	94.6	1.13751	0.00026062	23874
Q99JI4	Psmd6	26S proteasome non-ATPase regulatory subunit 6 OS=Mus musculus OX=10090 GN=Psmd6 PE=1 SV=1	45	19	24	19	389	45.5	5.52	33.24	109.1	106.6	108.8	93.2	89.7	92.6	1.17786	0.000258136	66413
Q91X79	Cela1	Chymotrypsin-like elastase family member 1 OS=Mus musculus OX=10090 GN=Cela1 PE=1 SV=1	43	8	18	8	266	28.9	8.24	45.46	44.8	44.4	48.8	154.7	151.2	156.2	0.298637	7.63301e-07	109901
Q8R0Y6	Aldh1l1	Cytosolic 10-formyltetrahydrofolate dehydrogenase OS=Mus musculus OX=10090 GN=Aldh1l1 PE=1 SV=1	27	20	22	17	902	98.6	5.91	27.52	70.3	71.2	69.7	133.6	123.8	131.3	0.54335	3.85113e-05	107747
Q9JIX8	Acin1	Apoptotic chromatin condensation inducer in the nucleus OS=Mus musculus OX=10090 GN=Acin1 PE=1 SV=3	13	16	21	16	1338	150.6	5.91	34.33	104.9	106	105.9	93.6	93.6	96	1.11864	0.000213448	56215
P08122	Col4a2	Collagen alpha-2(IV) chain OS=Mus musculus OX=10090 GN=Col4a2 PE=1 SV=4	8	10	23	10	1707	167.2	8.48	35.38	85.7	98.9	83.1	106.3	131.9	94	0.80584	0.152489	12827
Q9JII6	Akr1a1	Alcohol dehydrogenase [NADP(+)] OS=Mus musculus OX=10090 GN=Akr1a1 PE=1 SV=3	39	12	22	12	325	36.6	7.39	50.04	113.5	109.9	111.7	86.5	88.7	89.6	1.26548	7.22491e-05	58810
O08917	Flot1	Flotillin-1 OS=Mus musculus OX=10090 GN=Flot1 PE=1 SV=1	31	11	15	10	428	47.5	7.15	43.8	97.2	101.7	101.5	100.5	100.5	98.7	1.00234	0.890134	14251
P32020	Scp2	Non-specific lipid-transfer protein OS=Mus musculus OX=10090 GN=Scp2 PE=1 SV=3	20	11	24	11	547	59.1	7.44	42.04	115.4	110.9	114.6	87.5	82	89.6	1.31571	0.000507805	20280
Q9D1Q6	Erp44	Endoplasmic reticulum resident protein 44 OS=Mus musculus OX=10090 GN=Erp44 PE=1 SV=1	27	10	26	10	406	46.8	5.27	51.74	123.5	123.1	119.3	77.8	76.8	79.5	1.56301	9.29393e-06	76299
Q8BGD9	Eif4b	Eukaryotic translation initiation factor 4B OS=Mus musculus OX=10090 GN=Eif4b PE=1 SV=1	27	14	23	14	611	68.8	5.67	38.82	94.4	94.8	94.1	106	104.8	105.8	0.89482	1.25266e-05	75705
Q9Z204	Hnrnpc	Heterogeneous nuclear ribonucleoproteins C1/C2 OS=Mus musculus OX=10090 GN=Hnrnpc PE=1 SV=1	34	12	22	12	313	34.4	5.05	47.48	108.9	104.1	105.8	92.6	90	98.6	1.13371	0.0125527	15381
Q9QYB1	Clic4	Chloride intracellular channel protein 4 OS=Mus musculus OX=10090 GN=Clic4 PE=1 SV=3	58	13	22	12	253	28.7	5.59	29.49	93	91	90.9	106.3	118.1	100.6	0.845846	0.0325086	29876
Q8R2P8	Kars	Lysine--tRNA ligase OS=Mus musculus OX=10090 GN=Kars PE=1 SV=1	27	18	29	18	624	71.2	6.43	50.37	105.2	103.6	103.3	94.9	93.7	99.3	1.08406	0.0110098	85305
A0A1L1STE4	Ilf3	Interleukin enhancer-binding factor 3 OS=Mus musculus OX=10090 GN=Ilf3 PE=1 SV=1	12	11	19	11	908	97.4	8.92	35.74	102.3	106.4	104	97.5	93.5	96.4	1.08803	0.00745755	16201
Q8BK67	Rcc2	Protein RCC2 OS=Mus musculus OX=10090 GN=Rcc2 PE=1 SV=1	30	14	19	14	520	55.9	8.72	37.94	113.6	111	112.8	86.1	89.4	87.2	1.28435	3.60476e-05	108911
P50396	Gdi1	Rab GDP dissociation inhibitor alpha OS=Mus musculus OX=10090 GN=Gdi1 PE=1 SV=3	44	14	22	10	447	50.5	5.08	34.15	94.6	93.4	96.3	109.2	102.7	103.9	0.900253	0.00836616	14567
Q8C605	Pfkp	ATP-dependent 6-phosphofructokinase OS=Mus musculus OX=10090 GN=Pfkp PE=1 SV=1	20	15	19	11	784	85.5	6.89	46.48	105.6	121.1	107.3	89.7	97	79.3	1.25564	0.0331897	56421
Q8C196	Cps1	Carbamoyl-phosphate synthase [ammonia], mitochondrial OS=Mus musculus OX=10090 GN=Cps1 PE=1 SV=2	11	15	20	14	1500	164.5	6.92	29.77	50.2	56.1	55.8	149.2	140.4	148.4	0.370091	1.11347e-05	227231
Q9EQH3	Vps35	Vacuolar protein sorting-associated protein 35 OS=Mus musculus OX=10090 GN=Vps35 PE=1 SV=1	19	13	18	13	796	91.7	5.44	32.17	101.3	105.2	101.4	92.8	105.6	93.6	1.05445	0.288515	65114
Q9CYA0	Creld2	Cysteine-rich with EGF-like domain protein 2 OS=Mus musculus OX=10090 GN=Creld2 PE=1 SV=1	34	13	21	13	350	38.2	4.58	41.37	130.2	129.9	131.4	69.1	71.4	68	1.8777	6.36574e-07	76737
A0A1L1STE6	Idh3a	Isocitrate dehydrogenase [NAD] subunit, mitochondrial OS=Mus musculus OX=10090 GN=Idh3a PE=1 SV=1	28	11	22	11	384	41.5	6.93	47.44	98.1	93.7	98.3	105.7	100.2	104	0.936108	0.0406346	67834
Q80ZP8	Manf	Armet protein OS=Mus musculus OX=10090 GN=Manf PE=1 SV=1	53	11	30	11	165	19	8.13	36.44	132.4	129.9	128.3	68.5	71.5	69.4	1.86533	2.19959e-06	74840
P07744	Krt4	Keratin, type II cytoskeletal 4 OS=Mus musculus OX=10090 GN=Krt4 PE=1 SV=2	25	16	24	11	525	56.2	8.15	38.45	45	46.3	47.3	155.9	154.9	150.5	0.300455	4.56491e-07	16682
Q64462	Cyp4b1	Cytochrome P450 4B1 OS=Mus musculus OX=10090 GN=Cyp4b1 PE=1 SV=1	24	13	25	13	511	58.9	8.44	48.56	69.7	68	70.3	132.9	126.8	132.3	0.530612	7.57345e-06	13120
D4AFX7	Dnajc13	DnaJ heat shock protein family (Hsp40) member C13 OS=Mus musculus OX=10090 GN=Dnajc13 PE=1 SV=1	10	19	20	19	2248	254.9	6.77	29.9	108.3	109.9	112.2	87.6	93.8	88.2	1.22552	0.000878705	235567
A0A0U1RP81	Immt	MICOS complex subunit MIC60 OS=Mus musculus OX=10090 GN=Immt PE=1 SV=1	27	14	21	1	488	53.7	8.66	43.38	109.5	107.1	115.7	93.5	86.1	88.3	1.24039	0.00312537	76614
Q9DBD0	Ica	Inhibitor of carbonic anhydrase OS=Mus musculus OX=10090 GN=Ica PE=1 SV=1	27	17	25	16	700	76.7	7.25	46.41	90.8	88.2	90.3	110.5	108.7	111.6	0.814087	6.05134e-05	-
Q9QYC0	Add1	Alpha-adducin OS=Mus musculus OX=10090 GN=Add1 PE=1 SV=2	21	11	16	2	735	80.6	5.9	30.73	88.1	89.9	85.5	115.7	111.5	109.3	0.783061	0.000429633	11518
P19221	F2	Prothrombin OS=Mus musculus OX=10090 GN=F2 PE=1 SV=1	28	16	19	16	618	70.2	6.43	41.94	84.1	85	86.2	117.9	111.2	115.5	0.740859	0.000131337	14061
O08528	Hk2	Hexokinase-2 OS=Mus musculus OX=10090 GN=Hk2 PE=1 SV=1	18	16	20	14	917	102.5	6.11	43.62	116.3	120.9	121.1	78.9	84.2	78.5	1.48303	8.68847e-05	15277
E9QB02	Mars	Methionine--tRNA ligase, cytoplasmic OS=Mus musculus OX=10090 GN=Mars PE=1 SV=1	23	19	23	19	910	102.3	6.92	35.38	103.2	104.8	104.9	96.8	92.9	97.4	1.08986	0.0047452	-
Q8VHM5	Hnrnpr	Heterogeneous nuclear ribonucleoprotein R OS=Mus musculus OX=10090 GN=Hnrnpr PE=1 SV=1	22	13	22	9	632	70.8	8.13	41.7	101.7	100.5	99.1	96.1	104.1	98.4	1.00904	0.736428	74326
P29758	Oat	Ornithine aminotransferase, mitochondrial OS=Mus musculus OX=10090 GN=Oat PE=1 SV=1	27	11	19	11	439	48.3	6.62	31.07	103.1	101.1	103.6	97.1	99.3	95.9	1.05303	0.0146408	18242
A0A2I3BS41	Sorbs3	Vinexin OS=Mus musculus OX=10090 GN=Sorbs3 PE=1 SV=1	20	11	16	11	715	80.3	9	39.3	81.4	85.4	83.7	117.5	115.4	116.7	0.716533	1.4714e-05	20410
Q6P542	Abcf1	ATP-binding cassette sub-family F member 1 OS=Mus musculus OX=10090 GN=Abcf1 PE=1 SV=1	17	12	19	12	837	94.9	6.51	38.89	101.5	100.8	103.2	99	102.2	93.4	1.037	0.244987	224742
Q8BT60	Cpne3	Copine-3 OS=Mus musculus OX=10090 GN=Cpne3 PE=1 SV=2	25	12	26	10	533	59.5	5.78	53.02	117	111.3	115.7	87.6	80	88.3	1.34428	0.000753422	70568
Q9CWZ7	Napg	Gamma-soluble NSF attachment protein OS=Mus musculus OX=10090 GN=Napg PE=1 SV=1	46	12	19	12	312	34.7	5.41	36.94	95.4	95.1	102.2	103.2	99.4	104.6	0.952799	0.158318	108123
O35685	Nudc	Nuclear migration protein nudC OS=Mus musculus OX=10090 GN=Nudc PE=1 SV=1	37	12	21	12	332	38.3	5.26	43.69	103.1	101	101.5	96.3	101.4	96.8	1.03769	0.100927	18221
Q9DC07	Nebl	LIM zinc-binding domain-containing Nebulette OS=Mus musculus OX=10090 GN=Nebl PE=1 SV=1	54	14	26	12	270	31.1	8.31	36.19	86.2	85.4	85.5	117.9	110.5	114.5	0.749781	0.000185722	74103
P0DP27	Calm2	Calmodulin-2 OS=Mus musculus OX=10090 GN=Calm2 PE=1 SV=1	63	11	28	10	149	16.8	4.22	41.07	101.4	100.4	96.5	103	101.2	97.5	0.988731	0.634136	12314
Q9CVB6	Arpc2	Actin-related protein 2/3 complex subunit 2 OS=Mus musculus OX=10090 GN=Arpc2 PE=1 SV=3	38	14	25	14	300	34.3	7.36	53.14	120.7	119.3	121.8	76	83.3	78.8	1.51953	5.17896e-05	76709
Q5FWK3	Arhgap1	Rho GTPase-activating protein 1 OS=Mus musculus OX=10090 GN=Arhgap1 PE=1 SV=1	27	11	22	11	439	50.4	6.44	43.81	100.8	99.4	99.2	97.8	103.1	99.7	0.996008	0.818216	228359
P12382	Pfkl	ATP-dependent 6-phosphofructokinase, liver type OS=Mus musculus OX=10090 GN=Pfkl PE=1 SV=4	20	13	19	8	780	85.3	7.17	36.15	108.9	111	110.1	89	91.2	89.8	1.22222	2.27131e-05	18641
Q9D5V5	Cul5	Cullin-5 OS=Mus musculus OX=10090 GN=Cul5 PE=1 SV=3	14	12	18	12	780	90.9	7.81	37.43	101.5	99.7	98.5	100.8	99.9	99.6	0.998002	0.842472	75717
P48962	Slc25a4	ADP/ATP translocase 1 OS=Mus musculus OX=10090 GN=Slc25a4 PE=1 SV=4	39	14	23	8	298	32.9	9.72	40.92	91.8	91.7	92.6	109.6	107.1	107.2	0.852424	5.11996e-05	11739
Q3U0S6	Rasip1	Ras-interacting protein 1 OS=Mus musculus OX=10090 GN=Rasip1 PE=1 SV=3	16	13	18	13	961	103.5	7.83	39.72	80.1	82.6	79.8	119.5	120.7	117.3	0.678322	8.72259e-06	69903
Q8VD75	Hip1	Huntingtin-interacting protein 1 OS=Mus musculus OX=10090 GN=Hip1 PE=1 SV=2	13	13	16	12	1029	115.1	5.43	34.35	93.6	98.2	94.3	102.8	102.9	108.2	0.911437	0.0154443	215114
P25444	Rps2	40S ribosomal protein S2 OS=Mus musculus OX=10090 GN=Rps2 PE=1 SV=3	36	11	32	11	293	31.2	10.24	43.97	101.8	103.5	101.3	95.1	104.5	93.8	1.04499	0.269571	16898
Q64525	Hist2h2bb	Histone H2B type 2-B OS=Mus musculus OX=10090 GN=Hist2h2bb PE=1 SV=3	58	9	106	4	126	13.9	10.32	184.09	107	106.4	106.3	89.2	97.8	93.3	1.14056	0.00622114	-
Q3TEA8	Hp1bp3	Heterochromatin protein 1-binding protein 3 OS=Mus musculus OX=10090 GN=Hp1bp3 PE=1 SV=1	21	13	27	13	554	60.8	9.7	48.96	104.7	103.1	106.3	95.7	94.8	95.3	1.09902	0.000600792	15441
Q9QUK9	Try5	MCG15083 OS=Mus musculus OX=10090 GN=Try5 PE=1 SV=1	29	6	22	2	246	26.3	5.3	50.69	34.5	36.4	36.7	172.7	152.5	167.3	0.218477	2.97569e-05	103964
Q99L47	St13	Hsc70-interacting protein OS=Mus musculus OX=10090 GN=St13 PE=1 SV=1	28	11	26	11	371	41.6	5.26	42.12	103.4	104	102.7	95	99.8	95.1	1.06968	0.0144102	70356
G5E8F1	Itgam	Integrin alpha-M OS=Mus musculus OX=10090 GN=Itgam PE=1 SV=2	16	17	21	17	1154	127.5	7.25	35.13	123.6	126.5	128.8	72.9	74.5	73.6	1.71448	4.77142e-06	16409
Q9CPY7	Lap3	Cytosol aminopeptidase OS=Mus musculus OX=10090 GN=Lap3 PE=1 SV=3	32	15	20	15	519	56.1	7.72	39.28	113.6	111.9	112.2	83.8	89.7	88.9	1.28697	0.000197917	66988
O08795	Prkcsh	Glucosidase 2 subunit beta OS=Mus musculus OX=10090 GN=Prkcsh PE=1 SV=1	25	13	20	13	521	58.8	4.46	30.9	121.9	118	114.6	81	81.6	82.9	1.44399	7.62389e-05	19089
P62874	Gnb1	Guanine nucleotide-binding protein G(I)/G(S)/G(T) subunit beta-1 OS=Mus musculus OX=10090 GN=Gnb1 PE=1 SV=3	30	10	30	5	340	37.4	6	58.69	91.4	93.2	92.9	102.3	116.5	103.7	0.860465	0.0300728	14688
G5E902	Slc25a3	MCG10343, isoform CRA_b OS=Mus musculus OX=10090 GN=Slc25a3 PE=1 SV=1	32	12	24	12	358	39.7	9.29	48.56	107.5	103	103.9	96.4	92.8	96.3	1.10123	0.00604566	18674
P00920	Ca2	Carbonic anhydrase 2 OS=Mus musculus OX=10090 GN=Ca2 PE=1 SV=4	28	7	34	7	260	29	7.01	50.38	89.5	89.2	88.5	112.8	110.2	109.8	0.802885	2.4473e-05	-
Q8BSL7	Arf2	ADP-ribosylation factor 2 OS=Mus musculus OX=10090 GN=Arf2 PE=1 SV=2	59	9	32	5	181	20.7	6.58	45.6	102.5	102.9	104	100.1	92.1	98.5	1.06433	0.0661602	11841
Q8HWB2	H2-Q4	Histocompatibility 2, Q region locus 4 OS=Mus musculus OX=10090 GN=H2-Q4 PE=1 SV=1	26	9	22	3	354	39.6	6.62	44.6	104.8	104.2	106.3	88.6	96.1	99.9	1.10787	0.0388043	15015
A2BFF8	Dync1i2	Cytoplasmic dynein 1 intermediate chain 2 OS=Mus musculus OX=10090 GN=Dync1i2 PE=1 SV=1	17	10	16	10	611	68.2	5.29	33.11	96.7	96.4	94.1	103.6	105.7	103.5	0.918159	0.00143915	13427
P14152	Mdh1	Malate dehydrogenase, cytoplasmic OS=Mus musculus OX=10090 GN=Mdh1 PE=1 SV=3	40	14	24	14	334	36.5	6.58	53.92	100.4	100.2	100.3	98	103.4	97.7	1.00602	0.762304	17449
O08810	Eftud2	116 kDa U5 small nuclear ribonucleoprotein component OS=Mus musculus OX=10090 GN=Eftud2 PE=1 SV=1	18	16	21	15	971	109.3	5	38.89	106.4	104.5	104.3	93.3	92	99.5	1.10674	0.0136208	20624
Q9WTM5	Ruvbl2	RuvB-like 2 OS=Mus musculus OX=10090 GN=Ruvbl2 PE=1 SV=3	27	14	22	14	463	51.1	5.64	42.89	110.4	109.1	109.4	89.5	89.6	92	1.21321	2.9008e-05	20174
Q01514	Gbp1	Guanylate-binding protein 1 OS=Mus musculus OX=10090 GN=Gbp1 PE=1 SV=1	25	16	21	13	589	67.7	5.54	41.18	118.4	117.6	118.1	81.4	82.2	82.2	1.4406	5.56564e-08	-
Q61210	Arhgef1	Rho guanine nucleotide exchange factor 1 OS=Mus musculus OX=10090 GN=Arhgef1 PE=1 SV=2	22	17	21	17	920	102.7	5.6	29.71	104.7	103.5	107.8	93.4	96.6	93.9	1.11307	0.00273175	16801
O55222	Ilk	Integrin-linked protein kinase OS=Mus musculus OX=10090 GN=Ilk PE=1 SV=2	35	16	32	16	452	51.3	8.07	43.59	87.1	83.9	86.1	113.2	114.3	115.3	0.75	1.41827e-05	16202
Q8CGK3	Lonp1	Lon protease homolog, mitochondrial OS=Mus musculus OX=10090 GN=Lonp1 PE=1 SV=2	15	14	22	14	949	105.8	6.57	32.67	98.8	101.1	100	98.6	104.6	96.9	0.999334	0.979411	74142
A0A0N4SV32	Serbp1	Plasminogen activator inhibitor 1 RNA-binding protein OS=Mus musculus OX=10090 GN=Serbp1 PE=1 SV=1	31	13	22	13	362	39.6	8.47	25.19	93.9	94.2	94.1	105.2	108	104.6	0.88798	0.000351238	66870
P08226	Apoe	Apolipoprotein E OS=Mus musculus OX=10090 GN=Apoe PE=1 SV=2	44	15	26	15	311	35.8	5.68	45.47	131	127.7	127.7	67.8	73.6	72.2	1.80899	9.8231e-06	11816
Q62417	Sorbs1	Sorbin and SH3 domain-containing protein 1 OS=Mus musculus OX=10090 GN=Sorbs1 PE=1 SV=2	15	15	21	15	1290	143	8.25	30.96	81.5	87.2	83.1	113.2	119	116	0.723148	0.000175427	20411
Q91V41	Rab14	Ras-related protein Rab-14 OS=Mus musculus OX=10090 GN=Rab14 PE=1 SV=3	70	12	26	11	215	23.9	6.21	39.8	106.3	106.2	103.8	95.1	96.9	91.8	1.11452	0.00312553	68365
P55264	Adk	Adenosine kinase OS=Mus musculus OX=10090 GN=Adk PE=1 SV=2	43	16	23	16	361	40.1	6.21	36.05	87.3	90.5	85.5	110	118.4	108.2	0.782234	0.00213659	11534
P62192	Psmc1	26S proteasome regulatory subunit 4 OS=Mus musculus OX=10090 GN=Psmc1 PE=1 SV=1	36	15	19	14	440	49.2	6.21	37.86	111.2	109.3	111.9	91.1	86.3	90.2	1.24215	0.000203856	19179
Q6ZWX6	Eif2s1	Eukaryotic translation initiation factor 2 subunit 1 OS=Mus musculus OX=10090 GN=Eif2s1 PE=1 SV=3	33	12	20	12	315	36.1	5.08	37.35	104.5	104.5	104.5	97.6	93.9	95	1.09424	0.0012026	13665
Q8K009	Aldh1l2	Mitochondrial 10-formyltetrahydrofolate dehydrogenase OS=Mus musculus OX=10090 GN=Aldh1l2 PE=1 SV=2	21	16	19	13	923	101.5	6.29	38.24	46.1	47.4	46.6	161.1	141.8	157	0.304631	5.4535e-05	216188
Q9QUM9	Psma6	Proteasome subunit alpha type-6 OS=Mus musculus OX=10090 GN=Psma6 PE=1 SV=1	43	10	21	10	246	27.4	6.76	44.62	110.6	111.4	107.3	89.6	91	90.1	1.21648	0.00012138	26443
Q9QUI0	Rhoa	Transforming protein RhoA OS=Mus musculus OX=10090 GN=Rhoa PE=1 SV=1	31	7	30	3	193	21.8	6.1	51.49	105.8	99.3	104.1	99	97.6	94.2	1.06327	0.0638051	11848
O70252	Hmox2	Heme oxygenase 2 OS=Mus musculus OX=10090 GN=Hmox2 PE=1 SV=1	36	10	15	10	315	35.7	5.87	24.79	116.8	113.7	115	85.4	85.7	83.5	1.35703	1.15951e-05	15369
Q9CZX8	Rps19	40S ribosomal protein S19 OS=Mus musculus OX=10090 GN=Rps19 PE=1 SV=3	55	11	26	11	145	16.1	10.4	44.28	107.1	109.4	102.3	94.1	93.8	93.3	1.13371	0.00398983	20085
Q6NZD2	Snx1	Sorting nexin 1 OS=Mus musculus OX=10090 GN=Snx1 PE=1 SV=1	24	11	17	10	521	58.8	5.26	30.29	108.6	107.1	108.2	94.3	87.8	93.9	1.17355	0.00175646	56440
P97449	Anpep	Aminopeptidase N OS=Mus musculus OX=10090 GN=Anpep PE=1 SV=4	16	16	24	16	966	109.6	5.9	38.18	121.2	119.3	123.1	78.4	77.8	80.2	1.53807	5.47843e-06	16790
Q9D1A2	Cndp2	Cytosolic non-specific dipeptidase OS=Mus musculus OX=10090 GN=Cndp2 PE=1 SV=1	32	13	24	13	475	52.7	5.66	37.41	126.1	120.6	123.9	76.5	72.8	80	1.61622	5.64628e-05	66054
Q99K41	Emilin1	EMILIN-1 OS=Mus musculus OX=10090 GN=Emilin1 PE=1 SV=1	16	13	18	13	1017	107.5	5.3	36.16	103.2	102.8	102.9	99.6	94.1	97.3	1.06151	0.020283	100952
Q91YW3	Dnajc3	DnaJ homolog subfamily C member 3 OS=Mus musculus OX=10090 GN=Dnajc3 PE=1 SV=1	34	18	21	18	504	57.4	5.85	36.13	105.6	105.1	106.3	95	93.4	94.5	1.12054	4.18965e-05	100037258
Q9R111	Gda	Guanine deaminase OS=Mus musculus OX=10090 GN=Gda PE=1 SV=1	27	12	21	12	454	51	5.53	38.35	116.8	118.2	118.4	81.7	83.7	81.2	1.43309	2.60344e-06	14544
Q8BH61	F13a1	Coagulation factor XIII A chain OS=Mus musculus OX=10090 GN=F13a1 PE=1 SV=3	20	16	20	16	732	83.2	5.92	36.06	110.8	110	109.5	91.4	89.9	88.3	1.22515	3.14474e-05	74145
O08797	Serpinb9	SPI6 OS=Mus musculus OX=10090 GN=Serpinb9 PE=1 SV=1	32	12	24	11	374	42.2	5.4	43.92	106.9	106.4	107.9	93.3	93.2	92.2	1.15249	1.48853e-05	20723
P28843	Dpp4	Dipeptidyl peptidase 4 OS=Mus musculus OX=10090 GN=Dpp4 PE=1 SV=3	20	17	27	17	760	87.4	6.42	47.86	81.1	80.7	80	121.8	118.8	117.6	0.675042	7.27094e-06	13482
Q9D0F3	Lman1	Protein ERGIC-53 OS=Mus musculus OX=10090 GN=Lman1 PE=1 SV=1	28	12	22	12	517	57.8	6.34	42.79	117.9	115.6	121.3	85.1	76.5	83.6	1.44698	0.000306735	70361
Q7TNC4	Luc7l2	Putative RNA-binding protein Luc7-like 2 OS=Mus musculus OX=10090 GN=Luc7l2 PE=1 SV=1	32	12	19	8	392	46.6	10.1	32.48	111.6	110.5	113.9	87.9	84	92.1	1.27273	0.000704214	192196
E9PV41	Diaph1	Protein diaphanous homolog 1 OS=Mus musculus OX=10090 GN=Diaph1 PE=1 SV=1	14	18	24	18	1264	140.3	5.58	35.58	105.4	104.7	103	96.2	95.1	95.5	1.0917	0.00036006	13367
P08730	Krt13	Keratin, type I cytoskeletal 13 OS=Mus musculus OX=10090 GN=Krt13 PE=1 SV=2	30	16	27	9	437	47.7	4.86	44.72	45.7	46.7	44.7	160.6	146.6	155.7	0.296176	1.25747e-05	16663
Q6P8X1	Snx6	Sorting nexin-6 OS=Mus musculus OX=10090 GN=Snx6 PE=1 SV=2	29	11	16	11	406	46.6	6.16	33.9	100.1	100.2	103.9	99.2	97.1	99.4	1.02875	0.122518	72183
Q3UZ39	Lrrfip1	Leucine-rich repeat flightless-interacting protein 1 OS=Mus musculus OX=10090 GN=Lrrfip1 PE=1 SV=2	33	20	21	14	729	79.2	4.82	36.43	108.5	105.7	107	90.2	96	92.4	1.15291	0.00162683	16978
A0A0R4IZY0	Thop1	Thimet oligopeptidase OS=Mus musculus OX=10090 GN=Thop1 PE=1 SV=1	22	14	17	14	687	78	5.99	36.22	94.7	98.2	95.8	105.4	102.5	103.4	0.927401	0.00495502	50492
P70296	Pebp1	Phosphatidylethanolamine-binding protein 1 OS=Mus musculus OX=10090 GN=Pebp1 PE=1 SV=3	64	8	28	8	187	20.8	5.4	46.95	93.9	91.1	96	107.6	104.3	107.2	0.880602	0.00195341	23980
P70460	Vasp	Vasodilator-stimulated phosphoprotein OS=Mus musculus OX=10090 GN=Vasp PE=1 SV=4	26	10	12	10	375	39.6	8.53	28.67	112.4	110.6	114	86.4	88.5	88.2	1.28088	3.12059e-05	22323
E9QK48	Eml2	Echinoderm microtubule-associated protein-like 2 OS=Mus musculus OX=10090 GN=Eml2 PE=1 SV=1	13	10	17	10	841	90.7	6.98	44.72	105	102.5	101.8	96.4	99.4	95	1.06362	0.0190358	72205
P14869	Rplp0	60S acidic ribosomal protein P0 OS=Mus musculus OX=10090 GN=Rplp0 PE=1 SV=3	40	10	23	10	317	34.2	6.25	53.34	102.1	100.1	100	95.3	98.9	103.5	1.01512	0.576386	11837
P08228	Sod1	Superoxide dismutase [Cu-Zn] OS=Mus musculus OX=10090 GN=Sod1 PE=1 SV=2	55	8	26	8	154	15.9	6.51	67.97	94.3	93.5	89.6	102.9	114.6	105.2	0.859622	0.0173964	20655
Q8BJS4	Sun2	SUN domain-containing protein 2 OS=Mus musculus OX=10090 GN=Sun2 PE=1 SV=3	18	13	17	13	731	81.6	7.02	32.68	107.1	103.5	109.5	92.7	91.7	95.5	1.14362	0.00299602	223697
E9QKR0	Gnb2	Guanine nucleotide-binding protein G(I)/G(S)/G(T) subunit beta-2 OS=Mus musculus OX=10090 GN=Gnb2 PE=1 SV=1	25	9	20	3	382	41.4	6.6	45.53	93.4	98.9	97.5	103.4	107.6	99.2	0.934236	0.0812853	14693
Q9Z2D6	Mecp2	Methyl-CpG-binding protein 2 OS=Mus musculus OX=10090 GN=Mecp2 PE=1 SV=1	23	9	15	9	484	52.3	9.96	27.3	89.4	96.3	94.5	106.3	108.9	104.6	0.876173	0.00545108	17257
Q7TPV4	Mybbp1a	Myb-binding protein 1A OS=Mus musculus OX=10090 GN=Mybbp1a PE=1 SV=2	12	15	19	15	1344	151.9	8.95	40.13	109.3	106.2	108	92	92.8	91.6	1.17041	8.3699e-05	18432
Q61990	Pcbp2	Poly(rC)-binding protein 2 OS=Mus musculus OX=10090 GN=Pcbp2 PE=1 SV=1	40	11	17	5	362	38.2	6.79	36.34	104.9	105.3	104	92.5	96.1	97.2	1.09937	0.00299467	18521
P16125	Ldhb	L-lactate dehydrogenase B chain OS=Mus musculus OX=10090 GN=Ldhb PE=1 SV=2	27	9	25	8	334	36.5	6.05	39.5	97.9	97.8	97.5	96.7	107.5	102.5	0.955983	0.223026	16832
O08804	Serpinb6b	NK13 OS=Mus musculus OX=10090 GN=Serpinb6b PE=1 SV=2	28	12	17	12	377	42.5	5.26	40.8	100	100.3	106.2	98.5	95.9	99.2	1.04394	0.129132	20708
Q09014	Ncf1	Neutrophil cytosol factor 1 OS=Mus musculus OX=10090 GN=Ncf1 PE=1 SV=3	33	13	19	13	390	44.6	9.01	38.72	141.6	137.2	138.7	60.1	60.3	62.1	2.28767	6.82748e-07	17969
Q9DCN2	Cyb5r3	NADH-cytochrome b5 reductase 3 OS=Mus musculus OX=10090 GN=Cyb5r3 PE=1 SV=3	45	12	20	12	301	34.1	8.38	39.32	97.8	99.5	98.2	101.7	101	101.9	0.970125	0.00643095	109754
Q9JKY5	Hip1r	Huntingtin-interacting protein 1-related protein OS=Mus musculus OX=10090 GN=Hip1r PE=1 SV=2	18	17	19	16	1068	119.4	6.52	27.44	106	113.7	108.9	91.9	88.6	90.8	1.21121	0.0014511	29816
P70227	Itpr3	Inositol 1,4,5-trisphosphate receptor type 3 OS=Mus musculus OX=10090 GN=Itpr3 PE=1 SV=3	7	17	18	14	2670	304.1	6.54	34.46	106.6	107.6	104.9	94.6	92.2	94.1	1.13599	0.000290808	16440
Q922U2	Krt5	Keratin, type II cytoskeletal 5 OS=Mus musculus OX=10090 GN=Krt5 PE=1 SV=1	19	18	26	8	580	61.7	7.75	42.93	86.2	85.7	85.6	114.9	112.3	115.2	0.752044	7.22735e-06	110308
Q9CQN1	Trap1	Heat shock protein 75 kDa, mitochondrial OS=Mus musculus OX=10090 GN=Trap1 PE=1 SV=1	27	15	25	14	706	80.2	6.68	36.71	102.9	105.2	104.2	95.8	97.1	94.9	1.08513	0.000899231	68015
Q9ERK4	Cse1l	Exportin-2 OS=Mus musculus OX=10090 GN=Cse1l PE=1 SV=1	17	17	28	17	971	110.4	5.77	39.43	108.2	108.3	109.2	92	87.5	94.8	1.18739	0.00134344	110750
P80317	Cct6a	T-complex protein 1 subunit zeta OS=Mus musculus OX=10090 GN=Cct6a PE=1 SV=3	29	14	24	14	531	58	7.08	45.4	108.2	106.4	109.1	92.1	92	92.1	1.17198	3.73955e-05	12466
Q9DBG6	Rpn2	Dolichyl-diphosphooligosaccharide--protein glycosyltransferase subunit 2 OS=Mus musculus OX=10090 GN=Rpn2 PE=1 SV=1	26	11	18	11	631	69	5.81	40.06	116.3	113.7	112.7	85.7	83.2	88.4	1.33191	0.000103065	20014
A0A1Y7VJN6	Ighg3	Immunoglobulin heavy constant gamma 3 (Fragment) OS=Mus musculus OX=10090 GN=Ighg3 PE=4 SV=1	21	7	24	7	399	44	7.14	57.25	84.3	87	85.9	112.7	120	110	0.750511	0.000765978	-
Q91VC3	Eif4a3	Eukaryotic initiation factor 4A-III OS=Mus musculus OX=10090 GN=Eif4a3 PE=1 SV=3	24	11	17	9	411	46.8	6.73	37.52	113.3	111.5	112.8	87.1	86.1	89.3	1.2861	2.10485e-05	192170
P35979	Rpl12	60S ribosomal protein L12 OS=Mus musculus OX=10090 GN=Rpl12 PE=1 SV=2	59	7	18	7	165	17.8	9.42	38.75	101.8	101	103.2	96.3	100.7	97	1.04082	0.0569221	269261
B2RXS4	Plxnb2	Plexin-B2 OS=Mus musculus OX=10090 GN=Plxnb2 PE=1 SV=1	11	18	24	18	1842	206.1	5.87	33.41	102.2	103.5	105.8	96.4	96.8	95.2	1.0801	0.00264831	140570
Q9Z277	Baz1b	Tyrosine-protein kinase BAZ1B OS=Mus musculus OX=10090 GN=Baz1b PE=1 SV=2	11	15	18	15	1479	170.5	8.6	29.58	107.2	105.1	106.1	93	93.8	94.9	1.13028	0.000117135	22385
P62814	Atp6v1b2	V-type proton ATPase subunit B, brain isoform OS=Mus musculus OX=10090 GN=Atp6v1b2 PE=1 SV=1	26	11	19	11	511	56.5	5.81	42.35	109.8	111	113.1	87.5	82.9	95.6	1.25526	0.00412631	11966
O70400	Pdlim1	PDZ and LIM domain protein 1 OS=Mus musculus OX=10090 GN=Pdlim1 PE=1 SV=4	39	13	19	13	327	35.8	6.84	31.21	97	100.6	94.8	102.1	102.4	103.1	0.950585	0.0418797	54132
E9Q0U7	Hsph1	Heat shock protein 105 kDa OS=Mus musculus OX=10090 GN=Hsph1 PE=1 SV=1	18	14	18	12	817	91.6	5.59	36.64	108.2	109.2	109.4	94.5	87.7	91.1	1.19576	0.000870804	15505
Q8K1B8	Fermt3	Fermitin family homolog 3 OS=Mus musculus OX=10090 GN=Fermt3 PE=1 SV=1	24	13	18	13	665	75.6	7.05	32.55	109.7	106.8	109.2	92.2	94.4	87.7	1.18739	0.0013805	108101
Q5XJF6	Rpl10a	Ribosomal protein OS=Mus musculus OX=10090 GN=Rpl10a PE=1 SV=1	50	12	32	12	217	24.8	9.94	53.04	106.5	104.3	102.9	96.5	95.1	94.7	1.0957	0.00150723	19896
E9Q557	Dsp	Desmoplakin OS=Mus musculus OX=10090 GN=Dsp PE=1 SV=1	8	22	22	22	2883	332.7	6.8	32.56	84.3	91.8	89.9	111.7	111.7	110.6	0.796407	0.000575727	109620
Q99JY0	Hadhb	Trifunctional enzyme subunit beta, mitochondrial OS=Mus musculus OX=10090 GN=Hadhb PE=1 SV=1	27	11	22	11	475	51.4	9.38	33.09	100.7	98.3	97	100	103.2	100.9	0.973364	0.134658	231086
Q91ZW3	Smarca5	SWI/SNF-related matrix-associated actin-dependent regulator of chromatin subfamily A member 5 OS=Mus musculus OX=10090 GN=Smarca5 PE=1 SV=1	18	18	24	18	1051	121.6	8.15	37.03	110.9	111.2	111.8	88.2	93.3	84.6	1.25479	0.000878694	93762
Q921W7	Tes	Testin OS=Mus musculus OX=10090 GN=Tes PE=1 SV=2	34	14	16	14	419	47.7	7.93	30.7	104.2	99.9	105.5	97.2	92.5	100.8	1.06575	0.0962118	21753
Q9ER05	Ctrl	Chymopasin OS=Mus musculus OX=10090 GN=Ctrl PE=1 SV=1	47	7	14	7	264	28.1	8.35	29.82	40	38.9	39.4	171.1	147.2	163.5	0.245538	6.75144e-05	109660
P30681	Hmgb2	High mobility group protein B2 OS=Mus musculus OX=10090 GN=Hmgb2 PE=1 SV=3	44	13	28	10	210	24.1	7.31	37.23	129.5	128.1	124.5	74.2	73.6	70.1	1.75356	9.83677e-06	97165
E9QAS5	Chd4	Chromodomain-helicase-DNA-binding protein 4 OS=Mus musculus OX=10090 GN=Chd4 PE=1 SV=1	11	17	18	17	1922	218.5	5.86	39.42	102.5	102.1	103.3	96.6	93.5	102	1.05409	0.103702	107932
P61161	Actr2	Actin-related protein 2 OS=Mus musculus OX=10090 GN=Actr2 PE=1 SV=1	24	9	24	9	394	44.7	6.74	50.57	121.8	118.7	118.9	76.5	85	79	1.49439	0.00012786	66713
O89020	Afm	Afamin OS=Mus musculus OX=10090 GN=Afm PE=1 SV=2	27	17	21	17	608	69.3	5.78	35.14	85.7	87.4	84.6	113.7	115.3	113.2	0.753068	1.07049e-05	280662
Q9JHJ0	Tmod3	Tropomodulin-3 OS=Mus musculus OX=10090 GN=Tmod3 PE=1 SV=1	38	13	19	12	352	39.5	5.14	36.31	100.2	96.6	101.6	104.4	93.5	103.7	0.98939	0.794136	50875
Q3ULD5	Mccc2	Methylcrotonoyl-CoA carboxylase beta chain, mitochondrial OS=Mus musculus OX=10090 GN=Mccc2 PE=1 SV=1	30	12	18	12	563	61.3	8	40.46	90.4	89.5	94.5	107.3	107.1	111.2	0.842752	0.00110985	78038
P53810	Pitpna	Phosphatidylinositol transfer protein alpha isoform OS=Mus musculus OX=10090 GN=Pitpna PE=1 SV=2	46	15	25	13	271	31.9	6.37	46.34	109.5	107	109.3	90.4	91.4	92.3	1.18862	5.94122e-05	18738
A2AFQ2	Hsd17b10	3-hydroxyacyl-CoA dehydrogenase type-2 OS=Mus musculus OX=10090 GN=Hsd17b10 PE=1 SV=1	35	8	14	8	271	28.4	8.76	29.63	94.6	93.1	94.4	106.9	105.2	105.8	0.887386	6.36459e-05	15108
Q91ZJ5	Ugp2	UTP--glucose-1-phosphate uridylyltransferase OS=Mus musculus OX=10090 GN=Ugp2 PE=1 SV=3	29	16	23	16	508	56.9	7.61	20.79	106.8	104	108.2	94.9	92.1	93.8	1.13604	0.00100069	216558
Q8BX02	Kank2	KN motif and ankyrin repeat domain-containing protein 2 OS=Mus musculus OX=10090 GN=Kank2 PE=1 SV=1	18	12	19	12	843	90.2	5.55	29.42	86.5	86.4	85.4	113.4	117.5	111	0.755484	0.000133713	235041
Q80UW5	Cdc42bpg	Serine/threonine-protein kinase MRCK gamma OS=Mus musculus OX=10090 GN=Cdc42bpg PE=1 SV=2	12	15	17	15	1551	172	6.05	27.8	87.4	88.6	90.3	109.4	111.8	112.6	0.797783	6.10523e-05	240505
Q99LF4	Rtcb	tRNA-splicing ligase RtcB homolog OS=Mus musculus OX=10090 GN=Rtcb PE=1 SV=1	31	14	19	14	505	55.2	7.23	36.05	100.4	105.8	107.3	96.9	96.4	93.3	1.09386	0.0196094	28088
Q8CIH5	Plcg2	1-phosphatidylinositol 4,5-bisphosphate phosphodiesterase gamma-2 OS=Mus musculus OX=10090 GN=Plcg2 PE=1 SV=1	14	16	20	16	1265	147.5	6.77	30.53	127.7	126.5	129.1	71.6	73.8	71.3	1.7688	8.84439e-07	234779
P51859	Hdgf	Hepatoma-derived growth factor OS=Mus musculus OX=10090 GN=Hdgf PE=1 SV=2	35	9	16	9	237	26.3	4.83	34.9	95.2	97.9	97.3	106.4	101.7	101.5	0.937984	0.0236026	15191
Q922Q8	Lrrc59	Leucine-rich repeat-containing protein 59 OS=Mus musculus OX=10090 GN=Lrrc59 PE=1 SV=1	44	14	22	14	307	34.9	9.52	38.1	102.7	100.7	99.1	98.2	102.7	96.6	1.01681	0.472238	98238
P28650	Adssl1	Adenylosuccinate synthetase isozyme 1 OS=Mus musculus OX=10090 GN=Adssl1 PE=1 SV=2	34	15	17	13	457	50.2	8.43	27.45	110.1	108.1	108.2	89.3	88.8	95.6	1.19255	0.00153418	11565
F6XLV1	Crocc2	Ciliary rootlet coiled-coil, rootletin family member 2 OS=Mus musculus OX=10090 GN=Crocc2 PE=1 SV=2	12	19	21	19	1638	186.5	6.13	35.03	88.8	91.2	89.2	108.6	112.5	109.8	0.813539	0.000115228	381284
E9QP62	Lims1	LIM and senescent cell antigen-like-containing domain protein OS=Mus musculus OX=10090 GN=Lims1 PE=1 SV=1	34	11	23	7	387	44.3	7.88	31.7	93.9	88	90.2	104.8	113.2	109.8	0.830079	0.00340416	110829
E9Q565	Myzap	Myocardial zonula adherens protein OS=Mus musculus OX=10090 GN=Myzap PE=1 SV=1	33	12	20	12	438	50.6	6.35	33.21	83	82.3	80.8	117.9	114.5	121.6	0.695198	7.48841e-05	102371
B1AYL1	Scn7a	Sodium channel protein OS=Mus musculus OX=10090 GN=Scn7a PE=1 SV=1	10	14	18	14	1681	192.1	7.42	27.93	78.6	80	80.1	117.8	122.5	121	0.66067	9.90981e-06	20272
Q8BKG3	Ptk7	Inactive tyrosine-protein kinase 7 OS=Mus musculus OX=10090 GN=Ptk7 PE=1 SV=1	15	12	16	12	1062	117.5	6.84	34.89	91.9	91	92	108.5	111.2	105.5	0.845326	0.000561965	71461
D3YTN4	Gimap4	GTPase IMAP family member 4 OS=Mus musculus OX=10090 GN=Gimap4 PE=1 SV=1	38	12	19	12	328	38	6.23	38.91	95.8	95.3	96.4	104.2	103.4	104.9	0.92	0.000101016	107526
P62137	Ppp1ca	Serine/threonine-protein phosphatase PP1-alpha catalytic subunit OS=Mus musculus OX=10090 GN=Ppp1ca PE=1 SV=1	29	8	12	2	330	37.5	6.33	35.21	102	102.8	98	97.3	101.7	98.2	1.01884	0.403781	19045
P70168	Kpnb1	Importin subunit beta-1 OS=Mus musculus OX=10090 GN=Kpnb1 PE=1 SV=2	16	12	22	12	876	97.1	4.78	39.45	101.4	107.1	111.2	95.4	91.4	93.6	1.14016	0.0129504	16211
P99029	Prdx5	Peroxiredoxin-5, mitochondrial OS=Mus musculus OX=10090 GN=Prdx5 PE=1 SV=2	46	8	20	8	210	21.9	8.85	34.13	126.7	123.9	121.1	72.9	74.6	80.9	1.62741	8.18934e-05	54683
P49817	Cav1	Caveolin-1 OS=Mus musculus OX=10090 GN=Cav1 PE=1 SV=1	51	9	25	9	178	20.5	6.02	53.62	76.5	75.9	76.9	120.9	128.7	121	0.618726	5.45818e-05	12389
Q8BWY3	Etf1	Eukaryotic peptide chain release factor subunit 1 OS=Mus musculus OX=10090 GN=Etf1 PE=1 SV=4	27	11	19	11	437	49	5.71	37.44	107.3	104	102.7	92.4	98.8	94.8	1.0979	0.0157101	225363
P46664	Adss	Adenylosuccinate synthetase isozyme 2 OS=Mus musculus OX=10090 GN=Adss PE=1 SV=2	32	12	22	10	456	50	6.38	23.98	101.3	106.2	104.3	93.4	97.1	97.5	1.08264	0.0148112	11566
P47791	Gsr	Glutathione reductase, mitochondrial OS=Mus musculus OX=10090 GN=Gsr PE=1 SV=3	16	7	13	7	500	53.6	7.99	35.99	109.1	111.2	121.2	90.4	82.2	85.9	1.32108	0.00332883	14782
P97494	Gclc	Glutamate--cysteine ligase catalytic subunit OS=Mus musculus OX=10090 GN=Gclc PE=1 SV=4	23	13	18	13	637	72.5	5.9	38.33	116.6	115.9	114.1	85.9	88.3	79.2	1.3678	0.000387465	14629
Q03734	Serpina3m	Serine protease inhibitor A3M OS=Mus musculus OX=10090 GN=Serpina3m PE=1 SV=2	17	7	15	3	418	47	6.1	36.84	78.9	87	83.2	130.6	120.8	99.5	0.709889	0.0231287	20717
P26645	Marcks	Myristoylated alanine-rich C-kinase substrate OS=Mus musculus OX=10090 GN=Marcks PE=1 SV=2	39	7	18	7	309	29.6	4.34	24.22	86.9	83.3	82.1	110.5	126.8	110.4	0.725626	0.00486308	17118
P14602	Hspb1	Heat shock protein beta-1 OS=Mus musculus OX=10090 GN=Hspb1 PE=1 SV=3	41	9	18	9	209	23	6.55	41.25	79.6	80.1	79.7	121	119.9	119.8	0.663709	6.5682e-08	15507
P43275	Hist1h1a	Histone H1.1 OS=Mus musculus OX=10090 GN=Hist1h1a PE=1 SV=2	31	7	30	4	213	21.8	10.93	67.76	129.7	122.4	125	72.2	76.7	74	1.69179	3.33006e-05	-
Q62087	Pon3	Serum paraoxonase/lactonase 3 OS=Mus musculus OX=10090 GN=Pon3 PE=1 SV=2	29	10	23	9	354	39.3	5.74	29.95	117.1	114	116.8	79.5	83.6	88.9	1.38056	0.000382162	269823
Q505N6	Rps6ka1	Ribosomal protein S6 kinase OS=Mus musculus OX=10090 GN=Rps6ka1 PE=1 SV=1	20	13	16	9	735	82.8	7.97	34.93	105.9	103.9	108.4	92.3	97.4	92.1	1.12917	0.00500713	20111
A0A0A6YW28	Usp4	Ubiquitin carboxyl-terminal hydrolase 4 OS=Mus musculus OX=10090 GN=Usp4 PE=1 SV=1	19	15	19	14	915	103.7	5.48	27.74	103	108.4	100.8	98.3	93.9	95.6	1.08478	0.0350802	22258
Q8K010	Oplah	5-oxoprolinase OS=Mus musculus OX=10090 GN=Oplah PE=1 SV=1	15	15	21	15	1288	137.5	6.28	30.71	96.5	99.7	100	102.6	97.4	103.7	0.975305	0.327388	75475
P29699	Ahsg	Alpha-2-HS-glycoprotein OS=Mus musculus OX=10090 GN=Ahsg PE=1 SV=1	16	5	17	5	345	37.3	6.51	45.34	86.9	87.7	87.1	112.2	114.3	111.9	0.773345	5.49909e-06	11625
Q8C2Q7	Hnrnph1	Heterogeneous nuclear ribonucleoprotein H OS=Mus musculus OX=10090 GN=Hnrnph1 PE=1 SV=1	27	10	21	3	472	51.2	6.8	39.96	105.7	110.5	107.8	92.4	93.5	90	1.17434	0.000756178	59013
Q61753	Phgdh	D-3-phosphoglycerate dehydrogenase OS=Mus musculus OX=10090 GN=Phgdh PE=1 SV=3	19	11	22	11	533	56.5	6.54	43.79	89.8	88.9	90	108.9	109.7	112.7	0.811047	6.52845e-05	236539
Q7TMY8	Huwe1	E3 ubiquitin-protein ligase HUWE1 OS=Mus musculus OX=10090 GN=Huwe1 PE=1 SV=5	5	19	22	19	4377	482.3	5.22	33.62	97.5	105.3	103.5	100.3	94.7	98.8	1.04255	0.22303	59026
Q6ZWQ9	Myl12a	MCG5400 OS=Mus musculus OX=10090 GN=Myl12a PE=1 SV=1	51	7	27	3	172	19.9	4.81	37.57	101.6	98.9	98.1	101.5	99	100.7	0.991368	0.538537	67268
P10711	Tcea1	Transcription elongation factor A protein 1 OS=Mus musculus OX=10090 GN=Tcea1 PE=1 SV=2	40	12	18	12	301	33.9	8.38	28.53	109.1	106.5	106.5	90.8	91.2	95.9	1.15905	0.0013541	21399
O88544	Cops4	COP9 signalosome complex subunit 4 OS=Mus musculus OX=10090 GN=Cops4 PE=1 SV=1	32	11	15	11	406	46.3	5.83	34.41	102.1	102.7	99.8	95	100.2	100.2	1.03114	0.190115	26891
Q61792	Lasp1	LIM and SH3 domain protein 1 OS=Mus musculus OX=10090 GN=Lasp1 PE=1 SV=1	52	15	22	13	263	30	7.05	36.73	92.5	99.7	101.9	103	99.5	103.2	0.962054	0.277983	16796
P10852	Slc3a2	4F2 cell-surface antigen heavy chain OS=Mus musculus OX=10090 GN=Slc3a2 PE=1 SV=1	18	8	16	8	526	58.3	5.91	38.02	102.9	97.5	102.3	102.3	93.7	101.3	1.01816	0.60471	17254
F8WIV2	Serpinb6a	Serine (or cysteine) peptidase inhibitor, clade B, member 6a OS=Mus musculus OX=10090 GN=Serpinb6a PE=1 SV=1	24	8	25	8	399	44.7	6.38	33.99	94.7	90.5	91.5	112.1	102.3	108.9	0.855861	0.00787493	20719
Q64471	Gstt1	Glutathione S-transferase theta-1 OS=Mus musculus OX=10090 GN=Gstt1 PE=1 SV=4	32	9	19	9	240	27.4	7.27	42.82	95.3	93.1	90.5	108.6	105.3	107.1	0.868847	0.00113209	14871
P35486	Pdha1	Pyruvate dehydrogenase E1 component subunit alpha, somatic form, mitochondrial OS=Mus musculus OX=10090 GN=Pdha1 PE=1 SV=1	39	15	22	15	390	43.2	8.19	41.18	96.3	95.4	96.4	100.8	105.8	105.4	0.923397	0.00821098	18597
Q6PDI5	Ecpas	Proteasome adapter and scaffold protein ECM29 OS=Mus musculus OX=10090 GN=Ecpas PE=1 SV=3	8	12	14	12	1840	203.6	7.06	25.04	104	99.5	102.2	97.2	99.7	97.4	1.03874	0.0684242	230249
Q9DBR7	Ppp1r12a	Protein phosphatase 1 regulatory subunit 12A OS=Mus musculus OX=10090 GN=Ppp1r12a PE=1 SV=2	17	16	18	10	1029	114.9	5.49	21.54	83.4	87.2	86.8	114.9	109.6	118.1	0.751313	0.00050042	17931
P54823	Ddx6	Probable ATP-dependent RNA helicase DDX6 OS=Mus musculus OX=10090 GN=Ddx6 PE=1 SV=1	28	10	14	10	483	54.2	8.66	29.49	106.8	110.7	105.3	91.7	94.9	90.6	1.1645	0.00180605	13209
P62751	Rpl23a	60S ribosomal protein L23a OS=Mus musculus OX=10090 GN=Rpl23a PE=1 SV=1	52	13	28	13	156	17.7	10.45	45.03	103.5	100.9	101.7	97.9	99.4	96.6	1.04151	0.0218906	108168140
P46061	Rangap1	Ran GTPase-activating protein 1 OS=Mus musculus OX=10090 GN=Rangap1 PE=1 SV=2	24	13	17	13	589	63.5	4.68	30.97	107.8	109.5	106.4	91.2	92.6	92.4	1.17198	9.19654e-05	19387
Q8BJ71	Nup93	Nuclear pore complex protein Nup93 OS=Mus musculus OX=10090 GN=Nup93 PE=1 SV=1	16	13	18	13	819	93.2	5.72	34.76	109	112.4	113.3	89.1	86.8	89.5	1.26112	0.000119978	71805
Q9CPW4	Arpc5	Actin-related protein 2/3 complex subunit 5 OS=Mus musculus OX=10090 GN=Arpc5 PE=1 SV=3	71	9	21	9	151	16.3	5.67	42.31	116.9	115.9	115.7	83.9	83.4	84.2	1.38569	2.02593e-07	67771
Q99KV1	Dnajb11	DnaJ homolog subfamily B member 11 OS=Mus musculus OX=10090 GN=Dnajb11 PE=1 SV=1	27	9	17	9	358	40.5	6.32	33.82	118.4	118.5	119.5	77.4	87.3	79.1	1.46185	0.0002591	67838
Q9R112	Sqor	Sulfide:quinone oxidoreductase, mitochondrial OS=Mus musculus OX=10090 GN=Sqor PE=1 SV=3	33	11	20	11	450	50.3	9.09	35.75	96.5	103.4	100.5	97.1	102.7	99.9	1.00234	0.932072	59010
P35293	Rab18	Ras-related protein Rab-18 OS=Mus musculus OX=10090 GN=Rab18 PE=1 SV=2	40	8	16	8	206	23	5.36	34.6	99.8	104.1	101.2	99.6	97.8	97.4	1.03494	0.0750477	19330
Q9EPC1	Parva	Alpha-parvin OS=Mus musculus OX=10090 GN=Parva PE=1 SV=1	29	10	16	10	372	42.3	5.95	27.3	89.9	85.3	87.7	114.7	110.2	112.3	0.779656	0.00018336	57342
Q64133	Maoa	Amine oxidase [flavin-containing] A OS=Mus musculus OX=10090 GN=Maoa PE=1 SV=3	27	14	24	11	526	59.6	7.81	39.73	89.4	90	91.2	109.3	111.4	108.7	0.821494	3.60951e-05	17161
Q3UQ44	Iqgap2	Ras GTPase-activating-like protein IQGAP2 OS=Mus musculus OX=10090 GN=Iqgap2 PE=1 SV=2	12	18	26	15	1575	180.4	5.64	30.6	94.2	97.4	99.8	103.1	99.1	106.5	0.943959	0.0981525	544963
P27005	S100a8	Protein S100-A8 OS=Mus musculus OX=10090 GN=S100a8 PE=1 SV=3	90	5	31	5	89	10.3	5.68	57.54	136.1	132.8	133.5	57.2	66.8	73.7	2.03541	0.000152814	20201
Q99K30	Eps8l2	Epidermal growth factor receptor kinase substrate 8-like protein 2 OS=Mus musculus OX=10090 GN=Eps8l2 PE=1 SV=1	18	11	14	11	729	82.2	7.18	32.51	86.9	89	88.3	110.3	108.4	117.1	0.786778	0.000919863	98845
P16110	Lgals3	Galectin-3 OS=Mus musculus OX=10090 GN=Lgals3 PE=1 SV=3	24	7	22	7	264	27.5	8.38	43.74	131.2	130.5	132.7	66.2	69.2	70.3	1.91736	1.41173e-06	16854
Q8K310	Matr3	Matrin-3 OS=Mus musculus OX=10090 GN=Matr3 PE=1 SV=1	19	16	22	16	846	94.6	6.25	39.23	103.6	107.6	104.4	94.8	97.7	92.1	1.10892	0.00699022	17184
Q9ERG0	Lima1	LIM domain and actin-binding protein 1 OS=Mus musculus OX=10090 GN=Lima1 PE=1 SV=3	25	18	18	17	753	84	6.6	25.9	94	94.1	94.1	108.3	105.6	103.9	0.88798	0.000756254	65970
Q91V88	Npnt	Nephronectin OS=Mus musculus OX=10090 GN=Npnt PE=1 SV=1	22	11	20	11	561	61.5	8.35	33.81	82.1	89.2	83.5	120.2	117.6	107.3	0.738337	0.00259298	114249
Q8C2Q8	Atp5c1	ATP synthase subunit gamma OS=Mus musculus OX=10090 GN=Atp5c1 PE=1 SV=1	34	9	20	9	274	30.2	8.84	41.14	102.2	99.5	102.5	101.6	95.8	98.4	1.0284	0.220381	11949
Q99J77	Nans	Sialic acid synthase OS=Mus musculus OX=10090 GN=Nans PE=1 SV=1	42	12	27	12	359	40	7.06	37.68	113.5	115.3	112.2	86.6	89.7	82.8	1.31609	0.000237461	94181
Q9DB05	Napa	Alpha-soluble NSF attachment protein OS=Mus musculus OX=10090 GN=Napa PE=1 SV=1	34	8	16	8	295	33.2	5.45	25.44	107.9	108.9	109.3	86.9	94.6	92.4	1.19058	0.00171126	108124
Q05144	Rac2	Ras-related C3 botulinum toxin substrate 2 OS=Mus musculus OX=10090 GN=Rac2 PE=1 SV=1	41	9	24	4	192	21.4	7.61	46.73	118.4	124.9	123	81.7	72.7	79.2	1.56807	0.000180068	19354
Q99JI6	Rap1b	Ras-related protein Rap-1b OS=Mus musculus OX=10090 GN=Rap1b PE=1 SV=2	39	7	23	4	184	20.8	5.78	50.18	100	98.6	97.3	102	101.5	100.5	0.973355	0.0393753	215449
Q6PDL0	Dync1li2	Cytoplasmic dynein 1 light intermediate chain 2 OS=Mus musculus OX=10090 GN=Dync1li2 PE=1 SV=2	29	12	17	11	492	54.2	6.28	29.91	94.5	92.5	93	108.3	103.4	108.3	0.875	0.00156019	234663
Q8BP67	Rpl24	60S ribosomal protein L24 OS=Mus musculus OX=10090 GN=Rpl24 PE=1 SV=2	47	11	21	11	157	17.8	11.25	41.01	104.7	100	103.9	100	92.8	98.5	1.05939	0.09343	68193
Q3TJD7	Pdlim7	PDZ and LIM domain protein 7 OS=Mus musculus OX=10090 GN=Pdlim7 PE=1 SV=1	26	11	15	11	457	50.1	8.47	32.55	96	92.5	93.8	108.6	103.3	105.7	0.888854	0.0030792	67399
P45377	Akr1b8	Aldose reductase-related protein 2 OS=Mus musculus OX=10090 GN=Akr1b8 PE=1 SV=2	45	12	20	6	316	36.1	6.37	41.92	118.2	114.3	113.3	83.5	86.6	84.1	1.36035	6.63755e-05	14187
Q8C845	Efhd2	EF-hand domain-containing protein D2 OS=Mus musculus OX=10090 GN=Efhd2 PE=1 SV=1	38	8	12	8	240	26.8	5.14	29.58	114	109.6	112.5	86.3	88.2	89.3	1.27407	0.000102621	27984
O35286	Dhx15	Pre-mRNA-splicing factor ATP-dependent RNA helicase DHX15 OS=Mus musculus OX=10090 GN=Dhx15 PE=1 SV=2	17	13	18	12	795	90.9	7.46	29.27	110.6	111.2	116.6	90.7	79.9	90.9	1.29407	0.00334997	13204
P63087	Ppp1cc	Serine/threonine-protein phosphatase PP1-gamma catalytic subunit OS=Mus musculus OX=10090 GN=Ppp1cc PE=1 SV=1	29	8	12	2	323	37	6.54	34.25	111	111.5	106.8	94.2	86.9	89.6	1.21648	0.00168104	19047
P19973	Lsp1	Lymphocyte-specific protein 1 OS=Mus musculus OX=10090 GN=Lsp1 PE=1 SV=2	45	10	18	10	330	36.7	4.82	42.31	113.2	114.4	111.9	83.6	90.1	86.9	1.30276	0.000197167	16985
Q8BMA6	Srp68	Signal recognition particle subunit SRP68 OS=Mus musculus OX=10090 GN=Srp68 PE=1 SV=2	23	15	21	15	625	70.5	8.57	26.14	100.1	102.1	100.3	98.4	106.2	92.9	1.01681	0.691896	217337
Q8BM55	Tmem214	Transmembrane protein 214 OS=Mus musculus OX=10090 GN=Tmem214 PE=1 SV=1	18	13	16	13	687	76.4	9.29	32.69	90.6	88.3	92.1	111.2	108.6	109.1	0.823959	0.000144073	68796
Q9Z2U1	Psma5	Proteasome subunit alpha type-5 OS=Mus musculus OX=10090 GN=Psma5 PE=1 SV=1	34	5	18	5	241	26.4	4.79	33.62	102.4	106.2	104.8	96.2	95.3	95.1	1.09351	0.00152966	26442
P14206	Rpsa	40S ribosomal protein SA OS=Mus musculus OX=10090 GN=Rpsa PE=1 SV=4	25	7	23	7	295	32.8	4.87	51.55	102.8	101.5	101.6	96.8	100.3	97	1.04012	0.0312936	16785
Q3UJB0	Sf3b2	Splicing factor 3b, subunit 2 OS=Mus musculus OX=10090 GN=Sf3b2 PE=1 SV=1	20	15	20	15	878	98.1	5.62	26.14	110	106.6	107.9	91.3	95	89.2	1.17786	0.00114104	319322
Q569Z5	Ddx46	Probable ATP-dependent RNA helicase DDX46 OS=Mus musculus OX=10090 GN=Ddx46 PE=1 SV=2	15	15	18	15	1032	117.4	9.26	34.37	102	97.8	100.6	100.4	99.9	99.3	1.00267	0.844547	212880
Z4YKC4	Eif4g3	Eukaryotic translation initiation factor 4 gamma 3 OS=Mus musculus OX=10090 GN=Eif4g3 PE=1 SV=1	12	15	18	12	1567	173.4	5.53	23.33	102.9	97.9	106.9	97.9	95.3	99	1.05305	0.141416	230861
A0A171KXD3	Prmt1	Protein arginine N-methyltransferase 1 OS=Mus musculus OX=10090 GN=Prmt1 PE=1 SV=1	28	9	14	9	318	36.5	6.19	19.51	110.5	107.4	110.3	89.7	90.6	91.5	1.20751	7.60404e-05	15469
Q9D1G1	Rab1b	Ras-related protein Rab-1B OS=Mus musculus OX=10090 GN=Rab1b PE=1 SV=1	57	11	18	5	201	22.2	5.73	32	112	109	107.2	90.8	90.5	90.4	1.20795	0.000179219	76308
P49290	Epx	Eosinophil peroxidase OS=Mus musculus OX=10090 GN=Epx PE=1 SV=2	21	15	24	12	716	81.3	10.35	42.09	132.8	127.8	136.9	68.2	69	65.4	1.96199	2.18958e-05	13861
A0A0R4J0G0	Pck2	Phosphoenolpyruvate carboxykinase [GTP], mitochondrial OS=Mus musculus OX=10090 GN=Pck2 PE=1 SV=1	21	12	21	12	667	73.4	7.74	36.81	104.1	105.7	104.1	101.9	89	95.2	1.09717	0.0694906	74551
Q8BXK9	Clic5	Chloride intracellular channel protein 5 OS=Mus musculus OX=10090 GN=Clic5 PE=1 SV=1	52	9	16	7	251	28.3	5.94	33.19	77.3	72.1	79.5	125.3	121.1	124.7	0.616815	4.97662e-05	224796
A0A0A0MQC7	Mapt	Microtubule-associated protein OS=Mus musculus OX=10090 GN=Mapt PE=1 SV=1	18	10	14	10	733	76.2	6.79	25.1	79.3	79.5	76.4	121.5	126	117.3	0.644737	8.97812e-05	17762
P53994	Rab2a	Ras-related protein Rab-2A OS=Mus musculus OX=10090 GN=Rab2a PE=1 SV=1	38	8	14	8	212	23.5	6.54	32.82	98.8	93.9	93.7	100.1	110.5	103.1	0.912974	0.0605997	59021
Q9WV55	Vapa	Vesicle-associated membrane protein-associated protein A OS=Mus musculus OX=10090 GN=Vapa PE=1 SV=2	40	9	21	8	249	27.8	8.4	39.42	106.6	102.5	105.9	95.4	94.6	94.9	1.10565	0.00146281	30960
P81117	Nucb2	Nucleobindin-2 OS=Mus musculus OX=10090 GN=Nucb2 PE=1 SV=2	26	9	14	9	420	50.3	5.15	28.71	102.1	107.3	102.8	92	103.8	92	1.08478	0.128687	53322
P62264	Rps14	40S ribosomal protein S14 OS=Mus musculus OX=10090 GN=Rps14 PE=1 SV=3	39	7	16	7	151	16.3	10.05	41.72	101.6	102.3	102.1	96.4	96.8	100.9	1.04046	0.0524404	20044
Q8R1Q8	Dync1li1	Cytoplasmic dynein 1 light intermediate chain 1 OS=Mus musculus OX=10090 GN=Dync1li1 PE=1 SV=1	29	12	18	11	523	56.6	6.42	15.41	105.8	103.3	106.8	95	93.9	95.2	1.11193	0.000687018	235661
Q9DBG7	Srpra	Signal recognition particle receptor subunit alpha OS=Mus musculus OX=10090 GN=Srpra PE=1 SV=1	16	10	19	10	636	69.6	8.95	24.64	93	90.2	93.8	107.7	106.1	109.1	0.857851	0.000391143	-
Q9CZD3	Gars	Glycine--tRNA ligase OS=Mus musculus OX=10090 GN=Gars PE=1 SV=1	21	15	21	15	729	81.8	6.65	34.46	100	96.2	94.7	100.2	106.2	102.7	0.941119	0.0611216	353172
P13597	Icam1	Intercellular adhesion molecule 1 OS=Mus musculus OX=10090 GN=Icam1 PE=1 SV=1	18	11	24	11	537	58.8	6.13	47.11	90.5	88	89.2	108	113.2	111.1	0.805597	0.000210578	15894
P28474	Adh5	Alcohol dehydrogenase class-3 OS=Mus musculus OX=10090 GN=Adh5 PE=1 SV=3	29	9	17	8	374	39.5	7.25	35.51	100.3	98.8	98.3	98.6	102.2	101.8	0.982816	0.249593	11532
Q8R016	Blmh	Bleomycin hydrolase OS=Mus musculus OX=10090 GN=Blmh PE=1 SV=1	23	9	18	9	455	52.5	6.48	26.08	103.6	102.4	106.6	97.9	90.6	98.8	1.08806	0.0429397	104184
P62827	Ran	GTP-binding nuclear protein Ran OS=Mus musculus OX=10090 GN=Ran PE=1 SV=3	38	9	17	9	216	24.4	7.49	38.95	110.8	104.6	105.3	95.8	90.7	92.7	1.14864	0.00490707	19384
Q9DBF1	Aldh7a1	Alpha-aminoadipic semialdehyde dehydrogenase OS=Mus musculus OX=10090 GN=Aldh7a1 PE=1 SV=4	20	10	19	10	539	58.8	7.47	38.09	67.5	69.5	70.2	131.2	130.4	131.2	0.527495	2.15336e-07	110695
Q8C483	Sars	Serine--tRNA ligase, cytoplasmic OS=Mus musculus OX=10090 GN=Sars PE=1 SV=1	24	11	18	11	536	61.1	7.43	38.55	104.8	103.5	106.4	96.3	95.9	93	1.10344	0.00181437	20226
Q8CBB7	Ap1g1	AP-1 complex subunit gamma OS=Mus musculus OX=10090 GN=Ap1g1 PE=1 SV=1	13	11	17	11	825	91.7	6.8	36.71	110.9	109.3	107.2	89.1	93.8	89.8	1.20059	0.000551113	11765
Q9Z0J0	Npc2	NPC intracellular cholesterol transporter 2 OS=Mus musculus OX=10090 GN=Npc2 PE=1 SV=1	42	7	22	7	149	16.4	7.68	48.8	130.5	126.3	127	73.5	72	70.6	1.77603	3.48888e-06	67963
H7BX01	Opa1	Dynamin-like 120 kDa protein, mitochondrial OS=Mus musculus OX=10090 GN=Opa1 PE=1 SV=1	14	14	16	14	978	113.2	7.33	34.06	98.8	101.1	98.6	99.9	100.1	101.6	0.989721	0.344539	74143
Q3THK7	Gmps	GMP synthase [glutamine-hydrolyzing] OS=Mus musculus OX=10090 GN=Gmps PE=1 SV=2	18	13	18	13	693	76.7	6.73	28.57	107.8	110	112.1	89.8	89.3	90.8	1.2223	0.000109761	229363
P55284	Cdh5	Cadherin-5 OS=Mus musculus OX=10090 GN=Cdh5 PE=1 SV=2	12	10	16	10	784	87.8	5.3	41.63	77	77	76.1	124.2	124	121.7	0.62206	6.82705e-07	12562
P46935	Nedd4	E3 ubiquitin-protein ligase NEDD4 OS=Mus musculus OX=10090 GN=Nedd4 PE=1 SV=3	16	13	17	11	887	102.6	5.26	34.79	103.2	105.6	106.6	93.9	96.3	94.4	1.10822	0.00118267	17999
P04186	Cfb	Complement factor B OS=Mus musculus OX=10090 GN=Cfb PE=1 SV=2	23	16	20	16	761	85	7.37	29.05	91.4	92	90.9	105.3	111	109.4	0.842186	0.000579439	14962
Q8CDN6	Txnl1	Thioredoxin-like protein 1 OS=Mus musculus OX=10090 GN=Txnl1 PE=1 SV=3	33	6	14	6	289	32.2	4.96	31.03	107.4	106.8	102.9	92.2	92.1	98.6	1.12089	0.0113958	53382
B1AXN9	Rps6ka3	Non-specific serine/threonine protein kinase OS=Mus musculus OX=10090 GN=Rps6ka3 PE=1 SV=1	21	13	18	9	712	80.6	7.15	25.3	100	103.1	105.3	96.6	98.4	96.6	1.05761	0.0274433	110651
G3UZI2	Syncrip	Heterogeneous nuclear ribonucleoprotein Q OS=Mus musculus OX=10090 GN=Syncrip PE=1 SV=1	26	11	18	7	527	58.7	7.56	39.69	110.9	105.3	107.2	89	100.9	86.7	1.1692	0.0293538	56403
Q8BI84	Mia3	Transport and Golgi organization protein 1 homolog OS=Mus musculus OX=10090 GN=Mia3 PE=1 SV=2	8	14	15	14	1930	213.5	4.75	27.5	104.2	109.1	104.9	94.4	94.4	93	1.12917	0.00162036	338366
Q63844	Mapk3	Mitogen-activated protein kinase 3 OS=Mus musculus OX=10090 GN=Mapk3 PE=1 SV=5	28	11	17	9	380	43	6.61	37.17	101.9	98.8	97.9	103	98.5	99.9	0.99071	0.631233	26417
O09159	Man2b1	Lysosomal alpha-mannosidase OS=Mus musculus OX=10090 GN=Man2b1 PE=1 SV=4	15	13	16	13	1013	114.6	8.13	32.58	124.8	122.1	121.9	80	73	78.1	1.59585	3.65394e-05	17159
Q8JZN5	Acad9	Acyl-CoA dehydrogenase family member 9, mitochondrial OS=Mus musculus OX=10090 GN=Acad9 PE=1 SV=2	17	11	21	11	625	68.7	7.46	34.14	103.1	102	104.2	97.7	95.9	97.1	1.06398	0.00169066	229211
Q8VDM6	Hnrnpul1	Heterogeneous nuclear ribonucleoprotein U-like protein 1 OS=Mus musculus OX=10090 GN=Hnrnpul1 PE=1 SV=1	18	14	16	14	859	95.9	6.58	28.57	105.6	106.7	105.9	97.9	86.7	97.2	1.12917	0.0289449	232989
Q8BU30	Iars	Isoleucine--tRNA ligase, cytoplasmic OS=Mus musculus OX=10090 GN=Iars PE=1 SV=2	11	13	19	13	1262	144.2	6.55	43.53	106.2	106.3	103.2	96.1	93.7	94.4	1.11084	0.0010721	105148
O70435	Psma3	Proteasome subunit alpha type-3 OS=Mus musculus OX=10090 GN=Psma3 PE=1 SV=3	26	8	16	8	255	28.4	5.44	38.07	116.2	114.7	115.3	86.9	81.1	85.8	1.36407	7.32379e-05	19167
Q5SSZ5	Tns3	Tensin-3 OS=Mus musculus OX=10090 GN=Tns3 PE=1 SV=1	10	12	20	9	1440	155.5	6.65	36.13	89.6	91	93.7	113	100.1	112.5	0.842445	0.0175777	319939
Q8BH95	Echs1	Enoyl-CoA hydratase, mitochondrial OS=Mus musculus OX=10090 GN=Echs1 PE=1 SV=1	38	11	19	11	290	31.5	8.48	37.79	86.2	88.3	88.5	114.7	111.9	110.3	0.780647	7.66142e-05	93747
Q9EP69	Sacm1l	Phosphatidylinositide phosphatase SAC1 OS=Mus musculus OX=10090 GN=Sacm1l PE=1 SV=1	24	14	18	14	587	66.9	7.3	40.3	101.2	101.2	99	100.3	99.7	98.7	1.00904	0.358969	83493
V9GWY0	Gm15013	40S ribosomal protein S4 OS=Mus musculus OX=10090 GN=Gm15013 PE=3 SV=1	28	9	22	9	266	29.9	9.99	36.61	102.3	100	101	100.3	96.6	99.7	1.02259	0.167369	-
Q3UKJ7	Smu1	WD40 repeat-containing protein SMU1 OS=Mus musculus OX=10090 GN=Smu1 PE=2 SV=2	25	11	13	11	513	57.5	7.18	30.02	110.2	108.2	109.4	91.4	90.4	90.3	1.2047	1.06405e-05	74255
O70570	Pigr	Polymeric immunoglobulin receptor OS=Mus musculus OX=10090 GN=Pigr PE=1 SV=1	15	8	10	8	771	84.9	5.4	22.53	136	130.8	130.7	65.4	67.8	69.4	1.96199	6.51807e-06	18703
Q9CWK8	Snx2	Sorting nexin-2 OS=Mus musculus OX=10090 GN=Snx2 PE=1 SV=2	15	8	14	7	519	58.4	5.12	34.24	103.9	103.1	102.8	97.4	95.9	96.8	1.06791	0.000273415	67804
P67778	Phb	Prohibitin OS=Mus musculus OX=10090 GN=Phb PE=1 SV=1	45	12	16	12	272	29.8	5.76	27.48	106.2	105.3	107.1	95.9	91.3	94.2	1.1322	0.000999394	18673
Q9ET54	Palld	Palladin OS=Mus musculus OX=10090 GN=Palld PE=1 SV=2	11	14	18	14	1408	152	6.25	29.43	94.7	92.1	96.7	109.8	99.7	107.1	0.895452	0.0287346	72333
F6WHQ7	Gstm1	Glutathione S-transferase Mu 1 (Fragment) OS=Mus musculus OX=10090 GN=Gstm1 PE=1 SV=1	43	9	27	1	194	22.6	9.07	47.64	86.6	81.8	89.3	109	125.8	107.5	0.752848	0.0107983	14862
P22599	Serpina1b	Alpha-1-antitrypsin 1-2 OS=Mus musculus OX=10090 GN=Serpina1b PE=1 SV=2	21	10	16	4	413	45.9	5.54	31.63	85	84.3	86.5	118.1	109.2	116.9	0.743173	0.000502503	20701
O09131	Gsto1	Glutathione S-transferase omega-1 OS=Mus musculus OX=10090 GN=Gsto1 PE=1 SV=2	31	10	24	10	240	27.5	7.36	46.76	108	106.6	104.4	93.5	95	92.5	1.13523	0.000576403	14873
Q8BP47	Nars	Asparagine--tRNA ligase, cytoplasmic OS=Mus musculus OX=10090 GN=Nars PE=1 SV=2	19	12	19	12	559	64.2	5.86	25.23	106.8	103.3	106.7	92.5	97.6	93.1	1.11864	0.00479784	70223
Q921H8	Acaa1a	3-ketoacyl-CoA thiolase A, peroxisomal OS=Mus musculus OX=10090 GN=Acaa1a PE=1 SV=1	29	8	13	8	424	43.9	8.44	20.51	105.7	105.2	104.4	96.9	91.3	96.6	1.10709	0.00542474	113868
Q8BPU7	Elmo1	Engulfment and cell motility protein 1 OS=Mus musculus OX=10090 GN=Elmo1 PE=1 SV=2	21	15	17	15	727	83.9	6.28	34.97	110.6	127.5	108.8	83	84.8	85.3	1.3706	0.00645459	140580
Q8BPW9	Dnpep	Aspartyl aminopeptidase OS=Mus musculus OX=10090 GN=Dnpep PE=1 SV=1	27	10	16	10	470	51.6	7.42	30.35	103	108.2	106.1	92.4	98.9	91.5	1.12199	0.014375	13437
A0A0R4J007	Pald1	Paladin OS=Mus musculus OX=10090 GN=Pald1 PE=1 SV=1	18	14	18	14	859	96.7	6.57	31.12	88.6	92.7	88.1	109.3	109.8	111.5	0.814882	0.000219139	27355
Q8BI29	Sarg	Specifically androgen-regulated gene protein OS=Mus musculus OX=10090 GN=Sarg PE=1 SV=2	30	13	15	13	606	65.1	9.14	32.09	88.7	88	89.9	112.5	111.7	109.1	0.79988	4.46673e-05	-
Q543K9	Pnp	Purine nucleoside phosphorylase OS=Mus musculus OX=10090 GN=Pnp PE=1 SV=1	40	9	18	9	289	32.2	6.16	40.57	110.6	115.7	112.4	86.3	84	90.9	1.29671	0.000509543	18950
P23953	Ces1c	Carboxylesterase 1C OS=Mus musculus OX=10090 GN=Ces1c PE=1 SV=4	17	9	27	4	554	61	5.06	38.14	89.7	90.3	91	111.7	106.2	111	0.823959	0.00040065	13884
E9QNQ2	Ankrd44	Serine/threonine-protein phosphatase 6 regulatory ankyrin repeat subunit B OS=Mus musculus OX=10090 GN=Ankrd44 PE=1 SV=1	15	13	16	12	1011	109.3	6.43	23.44	106.7	107.5	105.3	94.9	90.8	95	1.13823	0.00106154	329154
F8VPM7	Erc1	ELKS/Rab6-interacting/CAST family member 1 OS=Mus musculus OX=10090 GN=Erc1 PE=1 SV=1	12	13	16	13	1120	128.3	5.91	26.19	97.4	96.5	101.4	97.5	107.4	99.8	0.96915	0.402441	111173
Q9CZU6	Cs	Citrate synthase, mitochondrial OS=Mus musculus OX=10090 GN=Cs PE=1 SV=1	26	13	29	8	464	51.7	8.57	43.32	108.8	102.8	102.6	94.8	97.6	93.4	1.09937	0.0164236	12974
Q8R050	Gspt1	Eukaryotic peptide chain release factor GTP-binding subunit ERF3A OS=Mus musculus OX=10090 GN=Gspt1 PE=1 SV=2	24	14	18	7	636	68.6	5.21	30.22	101.4	103.6	102.4	101.7	91.9	99.1	1.05022	0.177652	14852
Q5FWI3	Tmem2	Cell surface hyaluronidase OS=Mus musculus OX=10090 GN=Tmem2 PE=1 SV=1	11	14	16	14	1383	153.7	7.78	31.8	89.7	90.5	90.3	110.3	108.6	110.6	0.820941	7.9014e-06	-
A0A0R4IZW5	Cdh1	Cadherin 1, isoform CRA_b OS=Mus musculus OX=10090 GN=Cdh1 PE=1 SV=1	18	15	19	15	884	98.2	4.84	38.04	96.3	96.7	92.8	105.7	103.1	105.4	0.909612	0.00311542	12550
Q8VEE1	Lmcd1	LIM and cysteine-rich domains protein 1 OS=Mus musculus OX=10090 GN=Lmcd1 PE=1 SV=1	25	8	11	8	365	41	7.93	23.97	90.9	97.1	91.2	103.4	107.7	109.7	0.870324	0.0072125	30937
O54734	Ddost	Dolichyl-diphosphooligosaccharide--protein glycosyltransferase 48 kDa subunit OS=Mus musculus OX=10090 GN=Ddost PE=1 SV=2	22	9	17	9	441	49	5.83	39.32	113.4	108.2	112.3	89.2	87.2	89.7	1.25479	0.000210571	13200
Q06890	Clu	Clusterin OS=Mus musculus OX=10090 GN=Clu PE=1 SV=1	20	9	15	9	448	51.6	5.67	29.83	95.9	93.4	94	106.9	100.7	109.1	0.894537	0.0132553	12759
Q60972	Rbbp4	Histone-binding protein RBBP4 OS=Mus musculus OX=10090 GN=Rbbp4 PE=1 SV=5	26	9	12	4	425	47.6	4.89	33.05	114.5	111.2	108.9	83.8	93.4	88.2	1.26074	0.00199938	19646
Q62159	Rhoc	Rho-related GTP-binding protein RhoC OS=Mus musculus OX=10090 GN=Rhoc PE=1 SV=2	24	5	26	1	193	22	6.58	48.35	96.4	110	96	99.2	106.7	91.9	1.01545	0.819094	11853
Q9D2V7	Coro7	Coronin-7 OS=Mus musculus OX=10090 GN=Coro7 PE=1 SV=2	18	13	18	13	922	100.7	5.77	36.32	116.2	119.4	116.9	81.3	84.1	82	1.42482	1.0762e-05	78885
Q9WUM5	Suclg1	Succinate--CoA ligase [ADP/GDP-forming] subunit alpha, mitochondrial OS=Mus musculus OX=10090 GN=Suclg1 PE=1 SV=4	24	7	16	7	346	36.1	9.39	35.33	96.8	96.4	92.6	105.5	101.9	106.8	0.909612	0.00884066	56451
Q5XJY5	Arcn1	Coatomer subunit delta OS=Mus musculus OX=10090 GN=Arcn1 PE=1 SV=2	21	12	20	12	511	57.2	6.21	29.27	109.5	108.5	107.3	92.5	91.4	90.7	1.18463	3.33696e-05	213827
D3Z7R7	Arhgap45	Rho GTPase-activating protein 45 OS=Mus musculus OX=10090 GN=Arhgap45 PE=1 SV=1	13	12	14	12	1127	124	5.8	29.28	106.3	107.7	110.6	90.4	91.3	93.7	1.17865	0.000515896	70719
P16015	Ca3	Carbonic anhydrase 3 OS=Mus musculus OX=10090 GN=Ca3 PE=1 SV=3	48	10	15	10	260	29.3	7.37	33.28	61.8	66.1	64.2	131.8	148.7	127.4	0.470949	0.000404802	-
P52196	Tst	Thiosulfate sulfurtransferase OS=Mus musculus OX=10090 GN=Tst PE=1 SV=3	39	10	17	10	297	33.4	7.85	32.62	96.9	100.3	97.7	99.2	104	101.9	0.966568	0.120381	22117
Q91WK2	Eif3h	Eukaryotic translation initiation factor 3 subunit H OS=Mus musculus OX=10090 GN=Eif3h PE=1 SV=1	24	10	17	10	352	39.8	6.67	35.65	102.3	105.1	107.8	94.6	95.9	94.5	1.10596	0.00365658	68135
Q9DB20	Atp5o	ATP synthase subunit O, mitochondrial OS=Mus musculus OX=10090 GN=Atp5o PE=1 SV=1	44	8	18	8	213	23.3	9.99	33.81	103.2	97.2	101.4	103.8	92.8	101.6	1.01207	0.768056	28080
Q99KQ4	Nampt	Nicotinamide phosphoribosyltransferase OS=Mus musculus OX=10090 GN=Nampt PE=1 SV=1	28	12	16	12	491	55.4	7.15	33.04	116.1	117.4	120.7	78	84.9	82.8	1.4416	0.00012427	59027
Q9EPE9	Atp13a1	Manganese-transporting ATPase 13A1 OS=Mus musculus OX=10090 GN=Atp13a1 PE=1 SV=2	12	13	17	13	1200	132.3	8.03	30.61	102.5	106.7	102.1	92.7	99.5	96.4	1.07866	0.0368615	170759
Q3V0K9	Pls1	Plastin-1 OS=Mus musculus OX=10090 GN=Pls1 PE=1 SV=1	18	10	18	6	630	70.4	5.38	28.51	93.8	95.8	94.1	101.3	106.1	108.9	0.896933	0.00920729	102502
O08915	Aip	AH receptor-interacting protein OS=Mus musculus OX=10090 GN=Aip PE=1 SV=1	38	10	15	10	330	37.6	6.4	27.66	101.3	105.3	103.5	93.1	101.1	95.8	1.06931	0.0627523	11632
Q8BXC0	Ptgis	Prostacyclin synthase OS=Mus musculus OX=10090 GN=Ptgis PE=1 SV=1	26	11	16	11	509	57.7	8.65	29.56	89.6	89.7	89.5	111.6	110.3	109.3	0.811594	6.35158e-06	19223
P61164	Actr1a	Alpha-centractin OS=Mus musculus OX=10090 GN=Actr1a PE=1 SV=1	26	10	19	4	376	42.6	6.64	32.85	99.6	98.6	100.7	100	100.3	100.8	0.992693	0.32218	54130
Q80UG5	Sept9	Septin-9 OS=Mus musculus OX=10090 GN=Sept9 PE=1 SV=1	27	14	15	14	583	65.5	8.9	24.29	109.7	107.1	113	91.3	88.6	90.4	1.22013	0.000459215	#N/A
Q99L13	Hibadh	3-hydroxyisobutyrate dehydrogenase, mitochondrial OS=Mus musculus OX=10090 GN=Hibadh PE=1 SV=1	26	7	13	7	335	35.4	8.13	27.06	98.2	93.9	100.6	102.1	96.4	108.9	0.95218	0.299113	58875
E9Q634	Myo1e	Unconventional myosin-Ie OS=Mus musculus OX=10090 GN=Myo1e PE=1 SV=1	13	13	15	11	1107	126.7	9.07	23.34	113.2	118.3	119.7	84.3	80.7	83.8	1.41158	0.000114682	71602
P14094	Atp1b1	Sodium/potassium-transporting ATPase subunit beta-1 OS=Mus musculus OX=10090 GN=Atp1b1 PE=1 SV=1	34	11	19	11	304	35.2	8.65	20.03	114.5	109.9	111	86.5	90.7	87.4	1.26757	0.000234167	11931
O35452	Tnxb	Tenascin X OS=Mus musculus OX=10090 GN=Tnxb PE=1 SV=1	6	18	20	18	4006	435.2	5.22	19.46	78.6	87.8	83.7	115.8	116.4	117.7	0.714776	0.000256419	81877
O08692	Ngp	Neutrophilic granule protein OS=Mus musculus OX=10090 GN=Ngp PE=1 SV=1	56	10	22	10	167	19.3	5.31	38.37	117	115.9	115.8	85.3	84.8	81.3	1.38703	1.60726e-05	18054
P61222	Abce1	ATP-binding cassette sub-family E member 1 OS=Mus musculus OX=10090 GN=Abce1 PE=1 SV=1	20	11	16	11	599	67.3	8.34	23.44	101.6	99.4	103.6	97.7	98.5	99.2	1.03114	0.0759073	24015
E9Q3Q6	Alcam	CD166 antigen OS=Mus musculus OX=10090 GN=Alcam PE=1 SV=1	16	11	14	11	570	63.6	7.27	24.86	96.3	94	96.7	103.2	104.1	105.7	0.916933	0.00147473	11658
Q9D662	Sec23b	Protein transport protein Sec23B OS=Mus musculus OX=10090 GN=Sec23b PE=1 SV=1	23	13	15	12	767	86.4	6.96	23.41	110.9	108.5	110.1	87.1	89	94.5	1.21766	0.00108316	27054
P84084	Arf5	ADP-ribosylation factor 5 OS=Mus musculus OX=10090 GN=Arf5 PE=1 SV=2	64	10	28	5	180	20.5	6.79	29.16	106.3	108.1	102.1	97.4	90.2	95.9	1.1164	0.017595	11844
Q9ER72	Cars	Cysteine--tRNA ligase, cytoplasmic OS=Mus musculus OX=10090 GN=Cars PE=1 SV=2	17	14	20	14	831	94.8	6.76	32.96	106.3	105	104	93	95.9	95.8	1.10748	0.000924047	27267
A2AB60	Fmnl1	Formin-like 1, isoform CRA_c OS=Mus musculus OX=10090 GN=Fmnl1 PE=1 SV=1	15	15	18	13	1090	121.5	5.71	31.16	116.4	121.1	122.7	79.4	80	80.4	1.50209	3.04986e-05	57778
Q8C7R4	Uba6	Ubiquitin-like modifier-activating enzyme 6 OS=Mus musculus OX=10090 GN=Uba6 PE=1 SV=1	13	11	16	11	1053	117.9	6.11	34.1	110.1	114.4	109.4	90.3	87.8	88.1	1.25432	0.000208814	231380
Q3UEB3	Puf60	Poly(U)-binding-splicing factor PUF60 OS=Mus musculus OX=10090 GN=Puf60 PE=1 SV=2	21	10	13	10	564	60.2	5.29	30.61	111.2	110	108.1	88	91.5	91.2	1.21648	0.000170209	67959
Q64010	Crk	Adapter molecule crk OS=Mus musculus OX=10090 GN=Crk PE=1 SV=1	39	11	16	11	304	33.8	5.55	31.38	92.8	95	97.1	106.9	101	107.1	0.904444	0.0130427	12928
P28661	Sept4	Septin-4 OS=Mus musculus OX=10090 GN=Sept4 PE=1 SV=1	22	11	17	8	478	54.9	5.87	37.65	79.4	81.7	84.4	122.5	111.2	120.7	0.69272	0.000665012	#N/A
Q01768	Nme2	Nucleoside diphosphate kinase B OS=Mus musculus OX=10090 GN=Nme2 PE=1 SV=1	72	11	25	6	152	17.4	7.5	37.22	107.4	107.4	105.8	90.8	95.7	92.9	1.14746	0.000823364	18103
P47754	Capza2	F-actin-capping protein subunit alpha-2 OS=Mus musculus OX=10090 GN=Capza2 PE=1 SV=3	28	6	14	4	286	32.9	5.85	32.54	100.4	97.5	97.6	102.8	103.3	98.5	0.970125	0.16644	12343
Q8R0F9	Sec14l4	SEC14-like protein 4 OS=Mus musculus OX=10090 GN=Sec14l4 PE=1 SV=1	35	10	14	10	403	46	7.12	20.09	82.1	80.2	82.9	115.3	115.4	124	0.691288	0.000259387	103655
P70698	Ctps1	CTP synthase 1 OS=Mus musculus OX=10090 GN=Ctps1 PE=1 SV=2	20	12	16	11	591	66.6	6.58	28.07	122.7	119.7	124.9	76.2	74	82.6	1.57775	0.000114858	-
P21278	Gna11	Guanine nucleotide-binding protein subunit alpha-11 OS=Mus musculus OX=10090 GN=Gna11 PE=1 SV=1	28	8	14	3	359	42	5.97	27.97	88	96.3	96.2	117.2	102.9	99.4	0.877934	0.100068	14672
Q9WV91	Ptgfrn	Prostaglandin F2 receptor negative regulator OS=Mus musculus OX=10090 GN=Ptgfrn PE=1 SV=2	20	16	18	16	879	98.7	6.61	31.15	92.4	93.1	91.1	111.6	106.6	105.2	0.855288	0.00153918	19221
P51432	Plcb3	1-phosphatidylinositol 4,5-bisphosphate phosphodiesterase beta-3 OS=Mus musculus OX=10090 GN=Plcb3 PE=1 SV=2	11	14	17	14	1234	139.4	5.94	29.27	95.2	96.7	98	105	100.3	104.7	0.935161	0.0176482	18797
P63005	Pafah1b1	Platelet-activating factor acetylhydrolase IB subunit alpha OS=Mus musculus OX=10090 GN=Pafah1b1 PE=1 SV=2	29	12	15	12	410	46.6	7.37	28.65	99	94.6	98.9	104.7	105.3	97.4	0.951529	0.164653	18472
O08547	Sec22b	Vesicle-trafficking protein SEC22b OS=Mus musculus OX=10090 GN=Sec22b PE=1 SV=3	42	9	16	9	215	24.7	8.51	23.5	99.6	96.4	102.5	98.2	104.3	99	0.99005	0.720226	20333
Q91WU5	As3mt	Arsenite methyltransferase OS=Mus musculus OX=10090 GN=As3mt PE=1 SV=2	33	11	18	11	376	41.8	5.86	30.75	103.2	103	104.5	100.4	88.9	100	1.07397	0.133536	57344
Q8BH59	Slc25a12	Calcium-binding mitochondrial carrier protein Aralar1 OS=Mus musculus OX=10090 GN=Slc25a12 PE=1 SV=1	20	11	14	10	677	74.5	8.25	24.13	99.7	106.4	94.4	101.4	102.6	95.5	1.00334	0.939214	78830
Q9QZD8	Slc25a10	Mitochondrial dicarboxylate carrier OS=Mus musculus OX=10090 GN=Slc25a10 PE=1 SV=2	31	8	12	8	287	31.7	9.32	32.65	113.6	109.1	110.9	89.7	89.6	87.1	1.25225	0.000136663	27376
P21279	Gnaq	Guanine nucleotide-binding protein G(q) subunit alpha OS=Mus musculus OX=10090 GN=Gnaq PE=1 SV=4	34	11	15	6	359	42.1	5.68	30.49	83.4	89.9	85.3	116.9	116.4	108	0.757691	0.00136317	14682
Q924B0	Impa1	Inositol-1-monophosphatase OS=Mus musculus OX=10090 GN=Impa1 PE=1 SV=1	45	10	14	10	277	30.4	5.19	33.76	111.4	108.4	111.3	91	89.7	88.2	1.23131	8.33389e-05	55980
Q8CI51	Pdlim5	PDZ and LIM domain protein 5 OS=Mus musculus OX=10090 GN=Pdlim5 PE=1 SV=4	27	12	15	3	591	63.3	8.25	26.49	94.8	99.9	97.6	103	103.2	101.5	0.949951	0.0307481	56376
Q9DBL1	Acadsb	Short/branched chain specific acyl-CoA dehydrogenase, mitochondrial OS=Mus musculus OX=10090 GN=Acadsb PE=1 SV=1	26	10	12	10	432	47.8	7.87	20.32	96.6	92.4	98	104.9	101.7	106.3	0.917226	0.0162803	66885
P32067	Ssb	Lupus La protein homolog OS=Mus musculus OX=10090 GN=Ssb PE=1 SV=1	27	13	19	13	415	47.7	9.77	26.43	109.7	106.9	106.4	89.7	90.1	97.1	1.16649	0.00417821	20823
H7BX95	Srsf1	Serine/arginine-rich-splicing factor 1 OS=Mus musculus OX=10090 GN=Srsf1 PE=1 SV=1	48	12	22	12	253	28.3	10.08	25.16	107.7	108.1	110.4	88.4	93.7	91.7	1.19138	0.000578053	110809
Q9D8B3	Chmp4b	Charged multivesicular body protein 4b OS=Mus musculus OX=10090 GN=Chmp4b PE=1 SV=2	34	8	14	8	224	24.9	4.82	34.24	115.9	111.2	111.7	87	85	89.4	1.2961	0.000192118	75608
P62242	Rps8	40S ribosomal protein S8 OS=Mus musculus OX=10090 GN=Rps8 PE=1 SV=2	44	8	23	8	208	24.2	10.32	49.2	110.6	105.9	111.4	92.8	87.6	91.7	1.20507	0.00134307	100040298
Q504N0	Cpa2	Carboxypeptidase A2 OS=Mus musculus OX=10090 GN=Cpa2 PE=1 SV=1	21	7	16	7	417	47	5.31	30.2	24.7	25.4	32	182.8	162.5	172.5	0.158555	2.10449e-05	232680
Q91YJ2	Snx4	Sorting nexin-4 OS=Mus musculus OX=10090 GN=Snx4 PE=1 SV=1	19	8	13	8	450	51.7	5.8	28.27	113.3	114.3	114.4	85.5	88.5	84	1.32558	3.37181e-05	69150
E9Q1K3	Add1	Alpha-adducin OS=Mus musculus OX=10090 GN=Add1 PE=1 SV=1	21	10	14	1	660	72.9	6.32	21.26							#DIV/0!	#DIV/0!	11518
O54865	Gucy1b1	Guanylate cyclase soluble subunit beta-1 OS=Mus musculus OX=10090 GN=Gucy1b1 PE=1 SV=1	24	13	15	13	620	70.6	5.31	33.76	90.2	89.2	86	111.5	111.1	112.1	0.792949	5.88568e-05	54195
P61750	Arf4	ADP-ribosylation factor 4 OS=Mus musculus OX=10090 GN=Arf4 PE=1 SV=2	54	8	16	3	180	20.4	7.14	22.81	109	106.3	109.5	94.1	88.7	92.4	1.18023	0.000919396	11843
Q8BFW7	Lpp	Lipoma-preferred partner homolog OS=Mus musculus OX=10090 GN=Lpp PE=1 SV=1	18	8	20	8	613	65.8	7.37	29.3	92	96.3	101.3	102.9	107.4	100.2	0.932689	0.110598	210126
P00493	Hprt1	Hypoxanthine-guanine phosphoribosyltransferase OS=Mus musculus OX=10090 GN=Hprt1 PE=1 SV=3	40	7	18	7	218	24.6	6.68	23.21	120.5	122.1	124.1	75.9	81.5	76	1.57112	3.08077e-05	-
Q9QXX4	Slc25a13	Calcium-binding mitochondrial carrier protein Aralar2 OS=Mus musculus OX=10090 GN=Slc25a13 PE=1 SV=1	17	9	16	8	676	74.4	8.6	27.51	100.4	95.8	100.4	101.8	96.7	104.8	0.97791	0.472408	50799
A0A0R4J0V5	Polr2a	DNA-directed RNA polymerase subunit OS=Mus musculus OX=10090 GN=Polr2a PE=1 SV=1	9	16	19	16	1932	213.3	7.43	23.62	104.9	100.7	108.5	95.6	95.8	94.6	1.09825	0.0148463	20020
Q60634	Flot2	Flotillin-2 OS=Mus musculus OX=10090 GN=Flot2 PE=1 SV=2	22	9	14	9	428	47	5.2	30.48	102.5	101.6	102.2	98.2	99.6	96	1.04255	0.0182131	14252
Q9D2U9	Hist3h2ba	Histone H2B type 3-A OS=Mus musculus OX=10090 GN=Hist3h2ba PE=1 SV=3	52	8	70	3	126	14	10.37	117.73	114.6	113.6	112.4	89.6	83.3	86.6	1.31252	0.000149888	-
F6VQH5	Hnrnpdl	Heterogeneous nuclear ribonucleoprotein D-like (Fragment) OS=Mus musculus OX=10090 GN=Hnrnpdl PE=1 SV=1	26	9	14	8	323	35.6	7.8	30.8	109.2	100.8	105	113.9	87.5	83.6	1.10526	0.366143	50926
P60229	Eif3e	Eukaryotic translation initiation factor 3 subunit E OS=Mus musculus OX=10090 GN=Eif3e PE=1 SV=1	35	14	18	14	445	52.2	6.04	23.72	108.6	103.6	108	97	87.7	95	1.1448	0.0140118	16341
Q8BVI4	Qdpr	Dihydropteridine reductase OS=Mus musculus OX=10090 GN=Qdpr PE=1 SV=2	33	7	15	7	241	25.6	7.81	36.75	94	92.8	96.1	105.5	104.9	106.7	0.892148	0.000489345	110391
Q80WJ7	Mtdh	Protein LYRIC OS=Mus musculus OX=10090 GN=Mtdh PE=1 SV=1	17	9	14	9	579	63.8	9.33	25.59	112.2	113	104.4	91.5	86.7	92.3	1.21848	0.00375272	67154
Q8VDP3	Mical1	[F-actin]-monooxygenase MICAL1 OS=Mus musculus OX=10090 GN=Mical1 PE=1 SV=1	16	15	17	15	1048	116.7	6.05	30.4	107.7	101.6	107.5	97.3	91.1	94.8	1.11864	0.0141391	171580
Q9ERL9	Gucy1a1	Guanylate cyclase soluble subunit alpha-1 OS=Mus musculus OX=10090 GN=Gucy1a1 PE=1 SV=2	20	12	18	12	691	77.5	7.17	22.5	89.9	89	88.7	110	111.2	111	0.805539	1.99336e-06	60596
A0A1W2P6F6	Myl6	Myosin light polypeptide 6 OS=Mus musculus OX=10090 GN=Myl6 PE=1 SV=1	55	8	29	8	152	17	4.5	50.36	101.4	98.8	100	101.7	95.1	102.9	1.00167	0.950804	17904
F8WGK6	Sftpb	Pulmonary surfactant-associated protein B OS=Mus musculus OX=10090 GN=Sftpb PE=1 SV=1	22	7	15	7	376	41.6	6.2	28.08	96.6	89.9	93.8	107.7	104.5	107.6	0.876485	0.00397487	20388
Q8VDP4	Ccar2	Cell cycle and apoptosis regulator protein 2 OS=Mus musculus OX=10090 GN=Ccar2 PE=1 SV=2	15	12	18	12	922	102.9	5.25	27.58	106.7	110.3	103.8	90.5	100	88.6	1.14941	0.0253893	219158
Q6P5F9	Xpo1	Exportin-1 OS=Mus musculus OX=10090 GN=Xpo1 PE=1 SV=1	12	13	17	13	1071	123	6.07	22.27	113.8	109.3	118.3	88.8	81.7	88	1.3207	0.00129447	103573
P83741	Wnk1	Serine/threonine-protein kinase WNK1 OS=Mus musculus OX=10090 GN=Wnk1 PE=1 SV=2	7	15	19	15	2377	250.8	6.43	25.3	103	98.5	101.8	97.6	97.9	101.2	1.02224	0.282238	232341
D3YYE1	Anp32a	Acidic leucine-rich nuclear phosphoprotein 32 family member A (Fragment) OS=Mus musculus OX=10090 GN=Anp32a PE=1 SV=1	34	10	18	7	198	22.9	4.37	30.42	107.5	101.9	103.2	95.7	95.2	96.5	1.08768	0.00837355	11737
Q05D44	Eif5b	Eukaryotic translation initiation factor 5B OS=Mus musculus OX=10090 GN=Eif5b PE=1 SV=2	12	15	17	15	1216	137.5	5.59	16.37	94.8	96.1	93.7	108.4	102.7	104.4	0.90206	0.0048661	226982
P19157	Gstp1	Glutathione S-transferase P 1 OS=Mus musculus OX=10090 GN=Gstp1 PE=1 SV=2	33	5	18	5	210	23.6	7.87	43.53	82.7	79.6	83.3	119.4	117.9	117	0.693198	1.12315e-05	14870
Q8CG29	Myo1f	Myosin IF OS=Mus musculus OX=10090 GN=Myo1f PE=1 SV=1	14	13	15	11	1098	125.1	9.17	30.7	117.3	119.3	123.3	79.1	78.2	82.7	1.49958	5.76078e-05	17916
Q6ZQK5	Acap2	Arf-GAP with coiled-coil, ANK repeat and PH domain-containing protein 2 OS=Mus musculus OX=10090 GN=Acap2 PE=1 SV=2	21	14	15	14	770	87.2	6.68	13.81	91.8	92	93.7	106.8	102.4	113.4	0.860198	0.00986944	78618
P41245	Mmp9	Matrix metalloproteinase-9 OS=Mus musculus OX=10090 GN=Mmp9 PE=1 SV=2	19	13	18	13	730	80.5	6.09	31.49	113.9	119.1	116.7	81.1	85.5	83.7	1.39712	7.35452e-05	17395
Q9CZ13	Uqcrc1	Cytochrome b-c1 complex subunit 1, mitochondrial OS=Mus musculus OX=10090 GN=Uqcrc1 PE=1 SV=2	22	10	15	10	480	52.8	6.21	34.77	97.4	102	102.9	99.4	98.9	99.4	1.01545	0.420923	22273
Q3T9E4	Tgtp2	T-cell-specific guanine nucleotide triphosphate-binding protein 2 OS=Mus musculus OX=10090 GN=Tgtp2 PE=1 SV=2	23	9	11	9	415	47.1	5.74	25.93	144.5	138.8	139.8	60.1	57.9	58.9	2.39175	1.60764e-06	100039796
Q60668	Hnrnpd	Heterogeneous nuclear ribonucleoprotein D0 OS=Mus musculus OX=10090 GN=Hnrnpd PE=1 SV=2	27	10	21	1	355	38.3	7.81	41.69	94.7	130.2	167.2	76.1	59.3	72.6	1.8851	0.0464877	11991
G3X972	Sec24c	SEC24 related gene family, member C (S. cerevisiae), isoform CRA_a OS=Mus musculus OX=10090 GN=Sec24c PE=1 SV=1	15	16	18	15	1096	118.5	6.84	36.06	107.9	109.2	110.9	93	88.9	90.2	1.20544	0.000234722	218811
Q9EQH2	Erap1	Endoplasmic reticulum aminopeptidase 1 OS=Mus musculus OX=10090 GN=Erap1 PE=1 SV=2	11	10	19	10	930	106.5	6.2	28.14	117.8	118.9	115.5	81.8	83.6	82.5	1.42073	6.65817e-06	80898
Q9DBH5	Lman2	Vesicular integral-membrane protein VIP36 OS=Mus musculus OX=10090 GN=Lman2 PE=1 SV=2	27	9	19	9	358	40.4	6.95	24.93	122.4	123.6	118.7	78.8	77.5	79	1.54994	9.86263e-06	66890
Q9Z1N5	Ddx39b	Spliceosome RNA helicase Ddx39b OS=Mus musculus OX=10090 GN=Ddx39b PE=1 SV=1	22	11	18	6	428	49	5.67	31.68	108	107.7	109.5	91.9	90.1	92.9	1.18298	7.14107e-05	53817
P62748	Hpcal1	Hippocalcin-like protein 1 OS=Mus musculus OX=10090 GN=Hpcal1 PE=1 SV=2	54	11	21	7	193	22.3	5.5	31.41	96.2	92.6	94.8	105.5	106.9	104	0.896334	0.0012325	53602
A0A1B0GRR8	Snrnp70	U1 small nuclear ribonucleoprotein 70 kDa (Fragment) OS=Mus musculus OX=10090 GN=Snrnp70 PE=1 SV=1	45	10	14	10	168	20	7.53	29.64	107.1	108.8	105.7	92.2	95.9	90.2	1.15559	0.00159518	20637
Q62470	Itga3	Integrin alpha-3 OS=Mus musculus OX=10090 GN=Itga3 PE=1 SV=1	10	9	14	9	1053	116.7	6.57	33.96	81.4	81.1	81	119.7	117.2	119.6	0.683029	1.38288e-06	16400
Q6NZC7	Sec23ip	SEC23-interacting protein OS=Mus musculus OX=10090 GN=Sec23ip PE=1 SV=2	16	13	14	13	998	110.7	5.94	28.66	110.3	119.7	110.9	84.5	91.3	83.2	1.31622	0.00228173	207352
Q9R1P0	Psma4	Proteasome subunit alpha type-4 OS=Mus musculus OX=10090 GN=Psma4 PE=1 SV=1	35	11	19	11	261	29.5	7.72	22.79	114.9	111.4	113.7	84.2	90.3	85.5	1.30769	0.000230016	26441
P84099	Rpl19	60S ribosomal protein L19 OS=Mus musculus OX=10090 GN=Rpl19 PE=1 SV=1	38	10	21	10	196	23.5	11.47	24.79	106.1	106.2	103.3	91.7	100.5	92.3	1.10931	0.0257462	19921
Q3B7Z2	Osbp	Oxysterol-binding protein 1 OS=Mus musculus OX=10090 GN=Osbp PE=1 SV=3	18	11	14	11	805	88.7	7.2	23.91	95.4	95.9	97.7	101.1	105.5	104.2	0.929858	0.00799153	76303
Q9DCC5	Cbx3	Cbx3 protein OS=Mus musculus OX=10090 GN=Cbx3 PE=1 SV=1	37	8	14	7	183	20.8	5.33	22.36	119.4	109.4	115	84.6	83.9	87.6	1.34244	0.000712278	12417
Q8BHG1	Nrdc	Nardilysin OS=Mus musculus OX=10090 GN=Nrdc PE=1 SV=1	11	12	15	12	1161	132.8	4.87	20.29	114.5	111.3	116	84.7	84.9	88.5	1.32429	0.000114168	-
Q8QZY1	Eif3l	Eukaryotic translation initiation factor 3 subunit L OS=Mus musculus OX=10090 GN=Eif3l PE=1 SV=1	24	12	16	12	564	66.6	6.44	28.41	106.3	104.5	108.8	93.1	92.5	94.8	1.1398	0.000784086	223691
P62754	Rps6	40S ribosomal protein S6 OS=Mus musculus OX=10090 GN=Rps6 PE=1 SV=1	35	11	23	11	249	28.7	10.84	49.83	102.1	100.7	102.4	100.2	92.9	101.8	1.03493	0.285727	20104
Q8VCW8	Acsf2	Acyl-CoA synthetase family member 2, mitochondrial OS=Mus musculus OX=10090 GN=Acsf2 PE=1 SV=1	18	11	15	11	615	67.9	8.18	29.86	92.9	89.2	94.1	113.2	99.5	111.1	0.852996	0.0244577	264895
Q9DCT8	Crip2	Cysteine-rich protein 2 OS=Mus musculus OX=10090 GN=Crip2 PE=1 SV=1	39	5	16	5	208	22.7	8.63	41.62	79.7	83.2	78.4	124.8	112.5	121.4	0.672707	0.000575436	68337
O09164	Sod3	Extracellular superoxide dismutase [Cu-Zn] OS=Mus musculus OX=10090 GN=Sod3 PE=1 SV=1	32	6	17	6	251	27.4	6.84	29.32	88	92.7	86.5	105.6	124.6	102.6	0.802885	0.0375124	20657
Q9WUU7	Ctsz	Cathepsin Z OS=Mus musculus OX=10090 GN=Ctsz PE=1 SV=1	24	6	13	6	306	34	6.6	24.51	141.1	138.3	142.5	58.6	59.7	59.6	2.37156	3.71666e-07	64138
P60122	Ruvbl1	RuvB-like 1 OS=Mus musculus OX=10090 GN=Ruvbl1 PE=1 SV=1	31	11	13	11	456	50.2	6.42	19.81	114.5	109.8	110.1	91.8	83.8	90	1.25904	0.00131201	56505
Q9D154	Serpinb1a	Leukocyte elastase inhibitor A OS=Mus musculus OX=10090 GN=Serpinb1a PE=1 SV=1	28	10	16	10	379	42.5	6.21	31.99	97.6	92.6	96.1	105	102.8	105.9	0.912655	0.0063558	66222
O35226	Psmd4	26S proteasome non-ATPase regulatory subunit 4 OS=Mus musculus OX=10090 GN=Psmd4 PE=1 SV=1	28	8	10	7	376	40.7	4.79	22.72	97.1	95	102.4	97	109.7	98.8	0.963993	0.46436	19185
Q8C147	Dock8	Dedicator of cytokinesis protein 8 OS=Mus musculus OX=10090 GN=Dock8 PE=1 SV=4	7	13	14	13	2100	238.8	6.96	29.43	117.8	120.3	117.8	80.9	84.2	79	1.45801	2.7639e-05	76088
B1ARB3	Pecam1	Platelet endothelial cell adhesion molecule OS=Mus musculus OX=10090 GN=Pecam1 PE=1 SV=1	19	11	17	11	732	81.9	6.87	28.37	87.1	88.1	89.3	113.4	109.7	112.3	0.788611	4.8777e-05	18613
Q9WV32	Arpc1b	Actin-related protein 2/3 complex subunit 1B OS=Mus musculus OX=10090 GN=Arpc1b PE=1 SV=4	24	7	18	7	372	41	8.35	42	119.5	116.3	116.5	82.9	79.1	85.7	1.42229	8.84807e-05	11867
Q8BUR4	Dock1	Dedicator of cytokinesis protein 1 OS=Mus musculus OX=10090 GN=Dock1 PE=1 SV=3	6	12	14	10	1865	214.9	7.62	32.57	96.7	100	99.1	103	98.2	103	0.972387	0.2104	330662
G5E8G0	Hnrnpd	Heterogeneous nuclear ribonucleoprotein D, isoform CRA_b OS=Mus musculus OX=10090 GN=Hnrnpd PE=1 SV=1	38	11	21	2	287	30.6	8.41	37.64	113.2	111.7	109.2	88.5	87.1	90.3	1.25649	0.000107508	11991
D3YUM1	Ndufv1	NADH dehydrogenase [ubiquinone] flavoprotein 1, mitochondrial OS=Mus musculus OX=10090 GN=Ndufv1 PE=1 SV=1	31	12	15	12	455	49.9	8.07	22.17	108.8	104	106.4	93	93.1	94.7	1.13675	0.00101162	17995
Q9D819	Ppa1	Inorganic pyrophosphatase OS=Mus musculus OX=10090 GN=Ppa1 PE=1 SV=1	45	10	13	10	289	32.6	5.6	28.72	110.3	111.8	110.5	88.9	90.8	87.7	1.24383	2.84231e-05	67895
E9QM38	Slc12a2	Solute carrier family 12 member 2 OS=Mus musculus OX=10090 GN=Slc12a2 PE=1 SV=1	6	6	11	6	1206	130.6	6.52	26.73	90.9	94.4	90.1	113.8	95.7	115.1	0.848429	0.0624449	20496
Q64737	Gart	Trifunctional purine biosynthetic protein adenosine-3 OS=Mus musculus OX=10090 GN=Gart PE=1 SV=3	14	12	16	12	1010	107.4	6.68	37.3	105.5	101.8	106.3	98.2	89.3	98.9	1.09497	0.0553874	14450
Q3TKT4	Smarca4	Transcription activator BRG1 OS=Mus musculus OX=10090 GN=Smarca4 PE=1 SV=1	9	14	14	10	1613	181.3	8	25.38	109.9	108.9	110.8	90.6	92.1	87.7	1.21893	0.000148352	20586
F6ZQA3	Numa1	Nuclear mitotic apparatus protein 1 (Fragment) OS=Mus musculus OX=10090 GN=Numa1 PE=1 SV=1	24	15	18	1	741	82.8	9.44	23.1							#DIV/0!	#DIV/0!	101706
O88990	Actn3	Alpha-actinin-3 OS=Mus musculus OX=10090 GN=Actn3 PE=2 SV=1	10	8	13	1	900	103	5.45	27.09	61.8	68.1	47.6	136	138.3	148.2	0.420118	0.000330622	11474
O55137	Acot1	Acyl-coenzyme A thioesterase 1 OS=Mus musculus OX=10090 GN=Acot1 PE=1 SV=1	26	12	18	4	419	46.1	6.58	26.3	93.5	96.3	102	102.5	102.8	102.9	0.946788	0.0943884	26897
A2A841	Epb41	Protein 4.1 OS=Mus musculus OX=10090 GN=Epb41 PE=1 SV=1	19	13	17	12	869	97.2	5.49	30.9	84.6	88.2	88.2	111.1	112.5	115.3	0.770139	0.000112655	269587
Q61937	Npm1	Nucleophosmin OS=Mus musculus OX=10090 GN=Npm1 PE=1 SV=1	34	8	19	8	292	32.5	4.77	34.29	103.2	102.5	105.2	97.1	95.4	96.5	1.07578	0.00154167	18148
Q1HFZ0	Nsun2	tRNA (cytosine(34)-C(5))-methyltransferase OS=Mus musculus OX=10090 GN=Nsun2 PE=1 SV=2	25	16	18	16	757	85.4	6.58	18.55	108.5	111.5	105.2	93.5	89.8	91.5	1.18341	0.00134874	28114
B2M1R6	Hnrnpk	Heterogeneous nuclear ribonucleoprotein K OS=Mus musculus OX=10090 GN=Hnrnpk PE=1 SV=1	26	11	20	11	440	48.5	5.54	39.31	97.5	100.8	98.5	98.3	102.9	102.1	0.978569	0.276919	15387
Q91YH5	Atl3	Atlastin-3 OS=Mus musculus OX=10090 GN=Atl3 PE=1 SV=1	30	12	18	12	541	60.5	6.1	24.54	94.6	95.5	96.9	106.6	101.3	105.1	0.916933	0.00718896	109168
Q60865	Caprin1	Caprin-1 OS=Mus musculus OX=10090 GN=Caprin1 PE=1 SV=2	11	8	12	8	707	78.1	5.25	29.42	107.7	101.4	101.4	98.2	90.1	101.2	1.07254	0.149029	53872
Q64012	Raly	RNA-binding protein Raly OS=Mus musculus OX=10090 GN=Raly PE=1 SV=3	33	10	14	10	312	33.2	8.84	35.34	116.4	109.5	114.9	89.7	82	87.5	1.31481	0.00093463	19383
O55098	Stk10	Serine/threonine-protein kinase 10 OS=Mus musculus OX=10090 GN=Stk10 PE=1 SV=2	14	14	16	13	966	111.8	7.15	32.89	117.4	116.3	118.1	84.4	82.1	81.7	1.41741	4.04796e-06	20868
Q9CYR6	Pgm3	Phosphoacetylglucosamine mutase OS=Mus musculus OX=10090 GN=Pgm3 PE=1 SV=1	17	8	12	8	542	59.4	6.2	23.9	102.2	105.4	101.9	96.5	103.3	90.7	1.0654	0.171744	109785
Q9R1P1	Psmb3	Proteasome subunit beta type-3 OS=Mus musculus OX=10090 GN=Psmb3 PE=1 SV=1	42	8	15	8	205	22.9	6.55	21.51	110.1	111	115.3	92.5	88.2	82.9	1.27618	0.00163436	26446
Q61362	Chi3l1	Chitinase-3-like protein 1 OS=Mus musculus OX=10090 GN=Chi3l1 PE=1 SV=3	23	8	14	8	389	43.9	8.57	24.68	132.6	129.2	128.4	70.2	71.1	68.6	1.85898	2.20124e-06	-
Q61655	Ddx19a	ATP-dependent RNA helicase DDX19A OS=Mus musculus OX=10090 GN=Ddx19a PE=1 SV=2	23	11	17	11	478	53.9	6.67	31.89	100.2	102.9	100.3	101.7	101.6	93.2	1.02327	0.479453	13680
Q9Z0E6	Gbp2	Guanylate-binding protein 2 OS=Mus musculus OX=10090 GN=Gbp2 PE=1 SV=1	19	10	17	7	589	66.7	5.71	29.36	119.5	119.3	119.4	76.6	78.7	86.6	1.48078	0.000219244	14469
Q923B6	Steap4	Metalloreductase STEAP4 OS=Mus musculus OX=10090 GN=Steap4 PE=1 SV=1	24	8	10	8	470	53	9.17	24.12	128.5	123.3	134.4	71.9	73.3	68.5	1.80721	8.11796e-05	117167
D9J301	Pdlim5	ENH isoform 1d OS=Mus musculus OX=10090 GN=Pdlim5 PE=1 SV=1	25	10	13	1	574	61.8	7.91	27.79	116.4	103.8	121.3	88.6	93.7	76.2	1.32108	0.0197906	56376
Q8JZQ2	Afg3l2	AFG3-like protein 2 OS=Mus musculus OX=10090 GN=Afg3l2 PE=1 SV=1	15	12	15	12	802	89.5	8.6	26.16	101.9	104.7	101.3	93.2	99.2	99.6	1.05445	0.084365	69597
Q921T2	Tor1aip1	Torsin-1A-interacting protein 1 OS=Mus musculus OX=10090 GN=Tor1aip1 PE=1 SV=3	28	14	17	14	595	66.7	7.05	19.37	108.3	111.7	107.8	89.8	95.8	86.7	1.20382	0.00325318	208263
Q6P9R2	Oxsr1	Serine/threonine-protein kinase OSR1 OS=Mus musculus OX=10090 GN=Oxsr1 PE=1 SV=1	21	9	14	8	527	58.2	6.43	30.75	102.5	98.6	104.1	102.5	90.7	101.6	1.03528	0.448392	108737
E9QP99	Golga3	Golgin subfamily A member 3 OS=Mus musculus OX=10090 GN=Golga3 PE=1 SV=1	10	13	14	13	1487	167.2	5.38	24.85	100.6	101.3	99.5	99.1	101.5	98	1.00938	0.465631	269682
P62835	Rap1a	Ras-related protein Rap-1A OS=Mus musculus OX=10090 GN=Rap1a PE=1 SV=1	28	4	22	1	184	21	6.67	54.02	97.5	100	98.7	103.1	96	104.7	0.974984	0.412054	109905
Q6P9Q4	Fhod1	FH1/FH2 domain-containing protein 1 OS=Mus musculus OX=10090 GN=Fhod1 PE=1 SV=3	12	16	19	16	1197	129.5	6.28	25.66	87.7	103.5	96.5	107.1	103.2	102	0.92123	0.164333	234686
H7BX64	Slmap	Sarcolemmal membrane-associated protein OS=Mus musculus OX=10090 GN=Slmap PE=1 SV=1	13	10	11	10	828	95	5.35	23.92	89.8	90.4	94.5	111.4	103.5	110.4	0.844451	0.00429303	83997
E9PUD2	Dnm1l	Dynamin-1-like protein OS=Mus musculus OX=10090 GN=Dnm1l PE=1 SV=1	16	10	13	10	712	79.5	7.08	24.7	110.5	110	110.5	88.8	92.4	87.9	1.23003	0.000118179	74006
Q9JL35	Hmgn5	High mobility group nucleosome-binding domain-containing protein 5 OS=Mus musculus OX=10090 GN=Hmgn5 PE=1 SV=2	25	7	13	7	406	45.3	4.37	21.46	93.4	90.7	90.5	111.6	109	104.8	0.843884	0.00150833	50887
Q9JLV5	Cul3	Cullin-3 OS=Mus musculus OX=10090 GN=Cul3 PE=1 SV=1	24	18	20	17	768	88.9	8.46	24.41	102	103.9	104.1	98.7	95.3	96.1	1.0686	0.00563911	26554
Q8R4H2	Arhgef12	Rho guanine nucleotide exchange factor 12 OS=Mus musculus OX=10090 GN=Arhgef12 PE=1 SV=2	13	15	15	15	1543	172.2	5.74	23.52	86.4	85.9	87.8	116.8	110.1	113	0.765225	0.000192674	69632
Q61391	Mme	Neprilysin OS=Mus musculus OX=10090 GN=Mme PE=1 SV=3	18	13	16	13	750	85.6	5.81	34.33	75.9	80	77.3	125.5	118.5	122.8	0.635769	4.6989e-05	17380
Q62448	Eif4g2	Eukaryotic translation initiation factor 4 gamma 2 OS=Mus musculus OX=10090 GN=Eif4g2 PE=1 SV=2	18	14	18	14	906	102	7.14	28.77	103	102.7	98.5	98.4	100.4	97	1.0284	0.186032	13690
E9Q512	Trip11	Thyroid hormone receptor interactor 11 OS=Mus musculus OX=10090 GN=Trip11 PE=1 SV=1	9	18	19	18	1976	226.3	5.26	16.3	104.3	107.1	108.9	90.2	95.2	94.4	1.14475	0.00274485	109181
Q62422	Ostf1	Osteoclast-stimulating factor 1 OS=Mus musculus OX=10090 GN=Ostf1 PE=1 SV=2	48	7	12	7	215	23.8	5.68	28.9	117.8	116.2	112.3	85.4	83.1	85.1	1.36554	6.54618e-05	20409
Q9R1T2	Sae1	SUMO-activating enzyme subunit 1 OS=Mus musculus OX=10090 GN=Sae1 PE=1 SV=1	33	12	17	12	350	38.6	5.36	33.53	104.7	109.8	104.5	94.7	91.8	94.5	1.13523	0.00301067	56459
A0A087WQS2	Bzw1	Basic leucine zipper and W2 domain-containing protein 1 OS=Mus musculus OX=10090 GN=Bzw1 PE=1 SV=1	21	11	17	10	451	51.2	6.95	34.93	114.1	114	117.6	82.7	85	86.5	1.35995	4.67922e-05	66882
Q91WD5	Ndufs2	NADH dehydrogenase [ubiquinone] iron-sulfur protein 2, mitochondrial OS=Mus musculus OX=10090 GN=Ndufs2 PE=1 SV=1	30	11	15	11	463	52.6	6.99	20.69	106.2	105.9	107.3	96	86.3	98.3	1.13828	0.0250333	226646
Q6P9Q6	Fkbp15	FK506-binding protein 15 OS=Mus musculus OX=10090 GN=Fkbp15 PE=1 SV=2	13	13	13	13	1216	132.9	5.07	18.76	109.7	110.8	107.9	85.4	94.1	92.1	1.20913	0.00237487	338355
Q8R2Y2	Mcam	Cell surface glycoprotein MUC18 OS=Mus musculus OX=10090 GN=Mcam PE=1 SV=1	14	8	13	8	648	71.5	5.83	35.39	84.5	84.5	83	116.6	113.8	117.8	0.723722	1.53673e-05	84004
Q70IV5	Synm	Synemin OS=Mus musculus OX=10090 GN=Synm PE=1 SV=2	9	14	17	14	1561	173.1	5.12	34.35	75.4	76	77.8	125.2	126	119.6	0.618123	2.49419e-05	233335
P62911	Rpl32	60S ribosomal protein L32 OS=Mus musculus OX=10090 GN=Rpl32 PE=1 SV=2	47	8	16	8	135	15.9	11.33	34.88	93.5	94.7	92.5	101	114.4	103.9	0.879111	0.0354177	19951
Q9JHF5	Tcirg1	V-type proton ATPase subunit a OS=Mus musculus OX=10090 GN=Tcirg1 PE=1 SV=1	18	11	15	11	834	93.4	6.38	19.77	122.9	125.2	123.3	72.5	82.9	73.2	1.62467	0.000156366	27060
P51885	Lum	Lumican OS=Mus musculus OX=10090 GN=Lum PE=1 SV=2	30	8	19	8	338	38.2	6.43	29.72	89.3	90.1	85.7	113.7	108.4	112.8	0.79158	0.000394675	17022
A0A0G2JF67	Pde5a	Phosphodiesterase OS=Mus musculus OX=10090 GN=Pde5a PE=1 SV=1	19	13	15	13	833	94.4	6.05	22.78	95	98.2	96	109.1	100	101.7	0.930502	0.0710936	242202
Q6DFZ1	Gbf1	Golgi-specific brefeldin A-resistance factor 1 OS=Mus musculus OX=10090 GN=Gbf1 PE=1 SV=1	10	14	16	14	1861	206.7	5.8	18.66	105.3	110.3	107.2	93.6	94.7	89	1.16408	0.00262616	107338
Q62351	Tfrc	Transferrin receptor protein 1 OS=Mus musculus OX=10090 GN=Tfrc PE=1 SV=1	20	13	18	13	763	85.7	6.57	28.43	111.5	111.5	115	89.5	84	88.5	1.29008	0.000248686	22042
Q91V76		Ester hydrolase C11orf54 homolog OS=Mus musculus OX=10090 PE=1 SV=1	33	10	17	10	315	35	6.29	29.43	99.6	97.2	97.7	102.2	101.5	101.7	0.964309	0.00877575	#N/A
Q9D7Z6	Clca1	Calcium-activated chloride channel regulator 1 OS=Mus musculus OX=10090 GN=Clca1 PE=1 SV=2	15	12	17	12	913	100	6.01	27.21	144.3	143.2	144.2	56	58.4	53.9	2.56506	3.31473e-07	23844
Q9Z1G3	Atp6v1c1	V-type proton ATPase subunit C 1 OS=Mus musculus OX=10090 GN=Atp6v1c1 PE=1 SV=4	29	13	23	13	382	43.9	7.46	29.04	126.2	128.9	131.3	69.7	72.3	71.5	1.80984	4.12307e-06	66335
Q99LI8	Hgs	Hepatocyte growth factor-regulated tyrosine kinase substrate OS=Mus musculus OX=10090 GN=Hgs PE=1 SV=2	13	11	14	11	775	86	6.16	36.55	101.4	101.5	106	101.6	93.9	95.7	1.06078	0.100775	15239
P24547	Impdh2	Inosine-5'-monophosphate dehydrogenase 2 OS=Mus musculus OX=10090 GN=Impdh2 PE=1 SV=2	26	11	13	10	514	55.8	7.28	22.76	103.9	103.3	104.3	95.1	100.6	92.8	1.07972	0.0302896	23918
Q9Z315	Sart1	U4/U6.U5 tri-snRNP-associated protein 1 OS=Mus musculus OX=10090 GN=Sart1 PE=1 SV=1	21	13	14	13	806	90.8	5.82	17.76	96.1	100.6	98.4	104.8	98.2	101.9	0.967858	0.2302	20227
Q60902	Eps15l1	Epidermal growth factor receptor substrate 15-like 1 OS=Mus musculus OX=10090 GN=Eps15l1 PE=1 SV=3	14	12	17	12	907	99.2	5.02	17.87	98.6	101.5	96.6	103.7	97.3	102.3	0.978239	0.412538	13859
A0A1L1SVG6	Slc44a2	Choline transporter-like protein 2 OS=Mus musculus OX=10090 GN=Slc44a2 PE=1 SV=1	14	8	13	8	554	62.6	8.21	28.17	83.9	83.8	80.6	112.5	123.4	115.8	0.705999	0.000535683	68682
Q6P069	Sri	Sorcin OS=Mus musculus OX=10090 GN=Sri PE=1 SV=1	40	8	18	8	198	21.6	5.59	37.16	104.7	106.3	105.3	93.4	95.7	94.7	1.11452	0.000183449	109552
Q61704	Itih3	Inter-alpha-trypsin inhibitor heavy chain H3 OS=Mus musculus OX=10090 GN=Itih3 PE=1 SV=3	11	8	12	8	889	99.3	6.05	31.28	62.9	60.9	59.4	130.4	149.3	137.1	0.439539	0.000157811	16426
Q6DFW4	Nop58	Nucleolar protein 58 OS=Mus musculus OX=10090 GN=Nop58 PE=1 SV=1	15	8	13	8	536	60.3	8.34	22.01	108.7	105.2	101.7	94.7	96.8	93	1.10931	0.0107666	55989
Q4VA93	Prkca	Protein kinase C OS=Mus musculus OX=10090 GN=Prkca PE=1 SV=1	17	12	13	7	672	76.8	7.05	26.06	92.7	92.5	91	107.3	109.4	107.2	0.852732	5.91589e-05	18750
Q8R3G9	Tspan8	Tetraspanin-8 OS=Mus musculus OX=10090 GN=Tspan8 PE=1 SV=1	19	4	10	4	235	25.6	5.16	29.3	74.9	71.1	75.8	129.9	121.3	127	0.586462	5.68878e-05	216350
P97333	Nrp1	Neuropilin-1 OS=Mus musculus OX=10090 GN=Nrp1 PE=1 SV=2	10	6	8	6	923	102.9	5.9	24.52	95.9	89.9	94.8	110.2	101.5	107.7	0.878522	0.0152002	18186
Q9JHI5	Ivd	Isovaleryl-CoA dehydrogenase, mitochondrial OS=Mus musculus OX=10090 GN=Ivd PE=1 SV=1	21	9	19	9	424	46.3	8.29	34.73	84.7	81.6	82.1	118.1	115	118.6	0.706284	2.0241e-05	56357
Q9CZ44	Nsfl1c	NSFL1 cofactor p47 OS=Mus musculus OX=10090 GN=Nsfl1c PE=1 SV=1	26	9	17	1	370	40.7	5.15	33.59	94.4	93.2	98	106.2	104.9	103.3	0.908397	0.00452324	386649
Q8R164	Bphl	Valacyclovir hydrolase OS=Mus musculus OX=10090 GN=Bphl PE=1 SV=1	40	9	15	9	291	32.8	8.94	21.88	98	94.3	98.3	103.6	99	106.8	0.939237	0.0738025	68021
Q8VCC9	Spon1	Spondin-1 OS=Mus musculus OX=10090 GN=Spon1 PE=1 SV=1	19	14	18	14	807	90.8	6.02	29.91	90.8	92.8	91.4	110.4	104.7	109.9	0.846154	0.000962223	233744
Q61035	Hars	Histidine--tRNA ligase, cytoplasmic OS=Mus musculus OX=10090 GN=Hars PE=1 SV=2	23	12	16	10	509	57.4	6	24.85	111.4	109.8	112.4	88.3	86.7	91.4	1.25225	0.000141494	15115
P07310	Ckm	Creatine kinase M-type OS=Mus musculus OX=10090 GN=Ckm PE=1 SV=1	30	12	19	10	381	43	7.06	28.56	53.1	54.3	53.1	154.2	137	148.2	0.365271	5.14753e-05	12715
B1AV77	Aldh3a2	Aldehyde dehydrogenase OS=Mus musculus OX=10090 GN=Aldh3a2 PE=1 SV=1	22	12	20	11	487	54.3	8.48	34.94	98.4	101.4	98.3	101.4	99.9	100.6	0.987413	0.315789	11671
Q61503	Nt5e	5'-nucleotidase OS=Mus musculus OX=10090 GN=Nt5e PE=1 SV=2	17	8	14	8	576	63.8	6.64	28.66	94.7	91.2	94	109.5	103.1	107.6	0.874141	0.00350959	23959
P47911	Rpl6	60S ribosomal protein L6 OS=Mus musculus OX=10090 GN=Rpl6 PE=1 SV=3	28	12	23	12	296	33.5	10.7	33.86	97.9	100.3	99.2	99.5	104.5	98.6	0.982816	0.426862	19988
Q99KJ8	Dctn2	Dynactin subunit 2 OS=Mus musculus OX=10090 GN=Dctn2 PE=1 SV=3	30	9	17	9	402	44.1	5.26	28.3	96.3	93.6	93.6	104.7	105.7	106.2	0.895452	0.000386952	69654
Q8BYW1	Arhgap25	Rho GTPase-activating protein 25 OS=Mus musculus OX=10090 GN=Arhgap25 PE=1 SV=2	19	14	16	13	648	73.3	6.38	33.46	128.4	128.3	130.3	66.8	77.4	68.8	1.8169	6.27416e-05	232201
Q3V3R1	Mthfd1l	Monofunctional C1-tetrahydrofolate synthase, mitochondrial OS=Mus musculus OX=10090 GN=Mthfd1l PE=1 SV=2	13	12	17	11	977	105.7	7.02	27.35	107.2	110.9	111.2	95.1	84.3	91.2	1.21693	0.00456733	270685
A0A1B0GX27	Bcat2	Branched-chain-amino-acid aminotransferase OS=Mus musculus OX=10090 GN=Bcat2 PE=1 SV=1	24	8	15	8	388	43.5	8.43	20.52	72.4	73.9	74	126.1	127.9	125.7	0.580195	3.95622e-07	12036
P13864	Dnmt1	DNA (cytosine-5)-methyltransferase 1 OS=Mus musculus OX=10090 GN=Dnmt1 PE=1 SV=5	10	13	16	13	1620	183.1	7.74	22.48	105.5	107.1	106.8	89.8	95.9	94.8	1.13868	0.00260642	13433
Q99MR6	Srrt	Serrate RNA effector molecule homolog OS=Mus musculus OX=10090 GN=Srrt PE=1 SV=1	16	13	14	13	875	100.4	5.97	23.4	110.1	114.9	114.9	90.6	85.1	84.4	1.30681	0.000463104	83701
O55234	Psmb5	Proteasome subunit beta type-5 OS=Mus musculus OX=10090 GN=Psmb5 PE=1 SV=3	30	7	10	7	264	28.5	7.02	24.54	79.2	84.3	80	115.4	122.6	118.6	0.682838	0.00013483	19173
Q8JZR0	Acsl5	Long-chain-fatty-acid--CoA ligase 5 OS=Mus musculus OX=10090 GN=Acsl5 PE=1 SV=1	17	11	16	9	683	76.2	7.09	28.61	114.6	103	122	88.7	83.3	88.4	1.30415	0.0104058	433256
Q9JJU8	Sh3bgrl	SH3 domain-binding glutamic acid-rich-like protein OS=Mus musculus OX=10090 GN=Sh3bgrl PE=1 SV=1	46	7	12	7	114	12.8	4.92	20.65	101.4	103.8	97.9	94.2	106.7	95.9	1.02123	0.648823	56726
Q64324	Stxbp2	Syntaxin-binding protein 2 OS=Mus musculus OX=10090 GN=Stxbp2 PE=1 SV=1	26	12	15	12	593	66.3	6.74	22.7	107.9	100.3	107.6	96.5	91.1	96.6	1.11119	0.0267342	20911
Q9R0X4	Acot9	Acyl-coenzyme A thioesterase 9, mitochondrial OS=Mus musculus OX=10090 GN=Acot9 PE=1 SV=1	21	10	15	10	439	50.5	8.59	22.23	99.9	100.7	100	95.9	99.4	104.1	1.00401	0.875145	56360
P47856	Gfpt1	Glutamine--fructose-6-phosphate aminotransferase [isomerizing] 1 OS=Mus musculus OX=10090 GN=Gfpt1 PE=1 SV=3	21	13	15	11	697	78.5	6.84	28.21	108.1	110.5	108.8	91.8	88.8	92	1.20103	0.000130209	14583
A0A2I3BRL8	Gm7324	Predicted gene 7324 OS=Mus musculus OX=10090 GN=Gm7324 PE=4 SV=1	27	11	21	2	388	42.2	9.99	26.56	107.6	120.1	106.4	84.2	92.5	89.2	1.25649	0.0104504	-
Q9CZN7	Shmt2	Serine hydroxymethyltransferase, mitochondrial OS=Mus musculus OX=10090 GN=Shmt2 PE=1 SV=1	28	13	21	12	504	55.7	8.47	28.41	106.7	106.4	109.5	92.5	90.4	94.5	1.16294	0.000613629	108037
Q60598	Cttn	Src substrate cortactin OS=Mus musculus OX=10090 GN=Cttn PE=1 SV=2	14	8	14	8	546	61.2	5.4	35.25	83.1	84.8	83.7	112.3	119.3	116.8	0.722158	0.00010619	13043
E0CXN5	Gpd1	Glycerol-3-phosphate dehydrogenase [NAD(+)] OS=Mus musculus OX=10090 GN=Gpd1 PE=1 SV=1	38	12	17	11	326	35.2	7.59	23.51	103.1	104.2	103.3	97.3	96.6	95.6	1.07288	0.00029928	14555
E9PYI8	Usp14	Ubiquitin carboxyl-terminal hydrolase 14 OS=Mus musculus OX=10090 GN=Usp14 PE=1 SV=1	23	10	15	10	458	52.3	5.66	18.56	111.6	107.7	106.9	87.6	96.9	89.3	1.19138	0.005517	59025
P28063	Psmb8	Proteasome subunit beta type-8 OS=Mus musculus OX=10090 GN=Psmb8 PE=1 SV=2	43	9	15	9	276	30.2	6.68	26.42	106.4	116.5	111.2	85	92.3	88.7	1.25602	0.00322883	16913
Q7TT50	Cdc42bpb	Serine/threonine-protein kinase MRCK beta OS=Mus musculus OX=10090 GN=Cdc42bpb PE=1 SV=2	9	14	16	12	1713	194.6	6.46	24.42	92.5	95.8	96.8	104.9	106.1	104	0.905079	0.0022544	217866
F8VPN7	Dock9	Dedicator of cytokinesis protein 9 OS=Mus musculus OX=10090 GN=Dock9 PE=1 SV=1	8	16	18	1	2113	241.2	7.43	22.28	89.9	90.2	92	111.8	104.9	111.1	0.830079	0.00125531	105445
Q3U4F0	Sfxn3	Sideroflexin-3 OS=Mus musculus OX=10090 GN=Sfxn3 PE=1 SV=1	33	8	17	8	281	30.9	8.98	35.79	95.9	95.2	94.2	107.8	101.8	105	0.906866	0.00561916	94280
Q80X19	Col14a1	Collagen alpha-1(XIV) chain OS=Mus musculus OX=10090 GN=Col14a1 PE=1 SV=2	8	12	17	12	1797	192.9	5.1	22.92	104.6	108.9	104.7	94.4	94.1	93.4	1.12877	0.00112012	12818
Q3THW5	H2afv	Histone H2A.V OS=Mus musculus OX=10090 GN=H2afv PE=1 SV=3	54	5	28	3	128	13.5	10.58	58.31	106.7	102.7	102.8	92.9	99.8	95.1	1.08478	0.028426	-
E9QMR2	Dock9	Dedicator of cytokinesis protein 9 OS=Mus musculus OX=10090 GN=Dock9 PE=1 SV=1	8	16	18	1	2058	234.8	7.56	22.28							#DIV/0!	#DIV/0!	105445
O54774	Ap3d1	AP-3 complex subunit delta-1 OS=Mus musculus OX=10090 GN=Ap3d1 PE=1 SV=1	13	13	15	13	1199	135	7.37	21.59	109	104.8	103.9	90.9	98	93.3	1.1258	0.0105616	11776
Q9D8W5	Psmd12	26S proteasome non-ATPase regulatory subunit 12 OS=Mus musculus OX=10090 GN=Psmd12 PE=1 SV=4	22	11	15	11	456	52.9	7.06	26.22	113.2	107.3	113.3	88.4	89.6	88.2	1.25394	0.000375533	66997
Q9Z2I0	Letm1	Mitochondrial proton/calcium exchanger protein OS=Mus musculus OX=10090 GN=Letm1 PE=1 SV=1	13	9	15	9	738	82.9	6.52	28.84	98.8	100.3	100.2	99	100.9	100.7	0.995675	0.605064	56384
P45952	Acadm	Medium-chain specific acyl-CoA dehydrogenase, mitochondrial OS=Mus musculus OX=10090 GN=Acadm PE=1 SV=1	31	11	17	11	421	46.5	8.37	26.6	93.8	97.4	97.4	107.6	97.5	106.4	0.926485	0.0883859	11364
Q9CPN9	2210010C04Rik	RIKEN cDNA 2210010C04 gene OS=Mus musculus OX=10090 GN=2210010C04Rik PE=1 SV=1	43	9	23	9	247	26.4	7.93	20.94	32.6	36.8	31.9	171	160.7	167	0.203128	2.49019e-06	67373
Q91Z98	Chil4	Chitinase-like protein 4 OS=Mus musculus OX=10090 GN=Chil4 PE=1 SV=2	32	9	19	5	402	44.9	6.19	29.59	141.5	131.3	141.2	62.3	55	68.8	2.22461	0.000128435	104183
Q9EPL8	Ipo7	Importin-7 OS=Mus musculus OX=10090 GN=Ipo7 PE=1 SV=2	12	10	12	10	1038	119.4	4.82	17.49	97.4	100.6	103.2	98.4	105.1	95.3	1.00803	0.822638	233726
A0A0A0MQM0	Eif5a	Eukaryotic translation initiation factor 5A (Fragment) OS=Mus musculus OX=10090 GN=Eif5a PE=1 SV=1	37	7	21	7	149	16.3	5	44.26	106.2	103.4	101	93.3	98.4	97.8	1.07288	0.0330769	276770
P00329	Adh1	Alcohol dehydrogenase 1 OS=Mus musculus OX=10090 GN=Adh1 PE=1 SV=2	31	11	16	11	375	39.7	8.1	23.77	88	86.2	86.3	113.3	114	112.2	0.767305	4.69999e-06	11522
P15306	Thbd	Thrombomodulin OS=Mus musculus OX=10090 GN=Thbd PE=1 SV=1	15	7	16	7	577	61.8	4.6	31.15	83.1	81.7	82.8	121.4	113.6	117.5	0.702411	0.000107573	21824
Q8CGP7	Hist1h2ak	Histone H2A type 1-K OS=Mus musculus OX=10090 GN=Hist1h2ak PE=1 SV=3	60	6	28	1	130	14.1	11.05	52	133	143.2	109	51.1	109.6	54.2	1.79246	0.0578502	-
Q01730	Rsu1	Ras suppressor protein 1 OS=Mus musculus OX=10090 GN=Rsu1 PE=1 SV=3	24	7	23	7	277	31.5	8.88	36.52	89.8	88.5	92.9	109.6	108.7	110.5	0.824818	0.000165961	20163
Q9Z2U0	Psma7	Proteasome subunit alpha type-7 OS=Mus musculus OX=10090 GN=Psma7 PE=1 SV=1	35	8	18	8	248	27.8	8.46	23.52	108.1	111.3	106.1	89.8	95.1	89.7	1.18536	0.00191998	26444
Q91W50	Csde1	Cold shock domain-containing protein E1 OS=Mus musculus OX=10090 GN=Csde1 PE=1 SV=1	17	14	16	14	798	88.7	6.37	25.41	104.5	107.9	105.5	95.7	93.5	92.9	1.12691	0.000829267	229663
Q8BIJ6	Iars2	Isoleucine--tRNA ligase, mitochondrial OS=Mus musculus OX=10090 GN=Iars2 PE=1 SV=1	15	13	16	13	1012	112.7	6.81	18.19	100.2	97.3	100	98.9	102.9	100.7	0.983471	0.325206	381314
F8WHU5	Pds5b	Sister chromatid cohesion protein PDS5 homolog B OS=Mus musculus OX=10090 GN=Pds5b PE=1 SV=1	12	16	17	14	1449	164.7	8.54	15.99	103.7	105	104.3	94	95.8	97.3	1.09021	0.00108885	100710
Q61599	Arhgdib	Rho GDP-dissociation inhibitor 2 OS=Mus musculus OX=10090 GN=Arhgdib PE=1 SV=3	44	8	20	8	200	22.8	5.11	18.49	140.7	136.9	140.6	57.8	67	57.1	2.29907	2.12078e-05	11857
Q9D172	Gatd3a	Glutamine amidotransferase-like class 1 domain-containing protein 3A, mitochondrial OS=Mus musculus OX=10090 GN=Gatd3a PE=1 SV=1	33	8	11	8	266	28.1	8.78	22.63	97.2	93.8	95.2	105.3	103.8	104.8	0.911755	0.00102987	28295
Q91V89	Ppp2r5d	Serine/threonine-protein phosphatase 2A 56 kDa regulatory subunit OS=Mus musculus OX=10090 GN=Ppp2r5d PE=1 SV=1	22	11	14	7	594	69	7.96	25.2	106.2	97.4	104.9	96.9	88.9	105.7	1.05832	0.36675	21770
Q8QZS1	Hibch	3-hydroxyisobutyryl-CoA hydrolase, mitochondrial OS=Mus musculus OX=10090 GN=Hibch PE=1 SV=1	23	8	14	8	385	43	8.06	23.69	88.9	86.6	89.1	111.6	113.7	110.1	0.788909	5.69259e-05	227095
P16045	Lgals1	Galectin-1 OS=Mus musculus OX=10090 GN=Lgals1 PE=1 SV=3	50	6	21	6	135	14.9	5.49	47.39	127.4	126.9	125.6	71	75.3	73.9	1.72525	2.66024e-06	16852
Q61171	Prdx2	Peroxiredoxin-2 OS=Mus musculus OX=10090 GN=Prdx2 PE=1 SV=3	51	7	17	7	198	21.8	5.41	34.33	83	82	83.2	110.5	127.5	113.8	0.705514	0.0027026	21672
G3X956	Supt16	Suppressor of Ty 16 OS=Mus musculus OX=10090 GN=Supt16 PE=1 SV=1	13	13	16	13	1047	119.8	5.66	28.07	107.9	107	104.7	92.8	92.7	94.8	1.14021	0.000365733	114741
P63094	Gnas	Guanine nucleotide-binding protein G(s) subunit alpha isoforms short OS=Mus musculus OX=10090 GN=Gnas PE=1 SV=1	24	10	18	9	394	45.6	5.96	21.46	102.1	94.2	98.1	100.1	104.5	101.1	0.963036	0.226941	14683
Q6A0A9	FAM120A	Constitutive coactivator of PPAR-gamma-like protein 1 OS=Mus musculus OX=10090 GN=FAM120A PE=1 SV=2	12	10	13	10	1112	121.6	8.92	20.87	103.1	108	100.9	95.4	95.7	96.9	1.08333	0.0203921	218236
Q9WV54	Asah1	Acid ceramidase OS=Mus musculus OX=10090 GN=Asah1 PE=1 SV=1	24	10	15	10	394	44.6	8.46	22.9	118.7	114	116.8	82.8	85.1	82.5	1.39577	3.19555e-05	11886
Q9WUM3	Coro1b	Coronin-1B OS=Mus musculus OX=10090 GN=Coro1b PE=1 SV=1	23	12	21	12	484	53.9	5.78	36.81	113.6	108.8	109.5	86.9	89.9	91.2	1.23843	0.0004112	23789
E9PYH2	Acot7	Cytosolic acyl coenzyme A thioester hydrolase OS=Mus musculus OX=10090 GN=Acot7 PE=1 SV=1	26	9	14	9	384	42.8	8.68	19.01	117.6	110.4	113.3	91.8	81.3	85.7	1.31878	0.00173815	70025
P54116	Stom	Erythrocyte band 7 integral membrane protein OS=Mus musculus OX=10090 GN=Stom PE=1 SV=3	35	8	11	8	284	31.4	6.93	26.47	103.1	98	99	104.9	94.6	100.4	1.00067	0.985142	13830
Q99NB1	Acss1	Acetyl-coenzyme A synthetase 2-like, mitochondrial OS=Mus musculus OX=10090 GN=Acss1 PE=1 SV=1	14	9	13	9	682	74.6	6.98	33.05	104.9	103.4	105	93.8	97.8	95.1	1.09278	0.00232467	68738
D3Z5G7	Ces1b	Carboxylic ester hydrolase OS=Mus musculus OX=10090 GN=Ces1b PE=1 SV=1	12	6	18	2	567	62.2	5.22	42.18	89.4	98.1	101.6	102.7	103.7	104.5	0.929881	0.118366	382044
P42227	Stat3	Signal transducer and activator of transcription 3 OS=Mus musculus OX=10090 GN=Stat3 PE=1 SV=2	16	11	14	11	770	88	6.3	19.23	106.9	105.3	112	95.2	87.5	93	1.17592	0.00611066	20848
P29416	Hexa	Beta-hexosaminidase subunit alpha OS=Mus musculus OX=10090 GN=Hexa PE=1 SV=2	18	9	13	9	528	60.6	6.54	30.68	124.3	126	123	75	78.5	73.2	1.64667	1.05172e-05	15211
A0A1L1SV73	Usp47	Ubiquitin carboxyl-terminal hydrolase 47 OS=Mus musculus OX=10090 GN=Usp47 PE=1 SV=1	10	12	16	12	1376	157.1	5.06	20.28	99.1	105.6	103.1	96.7	97.4	98.2	1.05303	0.0563565	74996
Q9QZD9	Eif3i	Eukaryotic translation initiation factor 3 subunit I OS=Mus musculus OX=10090 GN=Eif3i PE=1 SV=1	26	8	12	8	325	36.4	5.64	27.68	106.2	109.3	111.6	90.3	86.5	96.1	1.19861	0.00484589	54709
Q9CR62	Slc25a11	Mitochondrial 2-oxoglutarate/malate carrier protein OS=Mus musculus OX=10090 GN=Slc25a11 PE=1 SV=3	29	7	12	7	314	34.1	9.94	30	105.3	103.3	104.8	91.4	92.2	103	1.09351	0.0778279	67863
P59325	Eif5	Eukaryotic translation initiation factor 5 OS=Mus musculus OX=10090 GN=Eif5 PE=1 SV=1	30	11	16	11	429	48.9	5.52	26.56	108.2	105	104.9	93.8	94.3	93.7	1.12881	0.000387478	217869
Q61425	Hadh	Hydroxyacyl-coenzyme A dehydrogenase, mitochondrial OS=Mus musculus OX=10090 GN=Hadh PE=1 SV=2	24	10	20	10	314	34.4	8.65	26.72	101.5	97.2	98.3	104.7	98.2	100.1	0.980198	0.437433	15107
P62141	Ppp1cb	Serine/threonine-protein phosphatase PP1-beta catalytic subunit OS=Mus musculus OX=10090 GN=Ppp1cb PE=1 SV=3	23	6	9	1	327	37.2	6.19	27.08	91.1	101.6	93.5	107	100.6	106.1	0.912337	0.071058	19046
Q9CRB6	Tppp3	Tubulin polymerization-promoting protein family member 3 OS=Mus musculus OX=10090 GN=Tppp3 PE=1 SV=1	44	9	13	9	176	19	9.11	29.16	66.6	68	66.7	134.3	132.7	131.6	0.505018	2.14216e-07	67971
G3X9K3	Arfgef1	Brefeldin A-inhibited guanine nucleotide-exchange protein 1 OS=Mus musculus OX=10090 GN=Arfgef1 PE=1 SV=1	9	16	17	7	1846	208.4	5.86	18.21	101.1	101.7	136.9	84.8	89.9	85.5	1.30553	0.0907026	211673
P11881	Itpr1	Inositol 1,4,5-trisphosphate receptor type 1 OS=Mus musculus OX=10090 GN=Itpr1 PE=1 SV=2	6	16	17	11	2749	313	6.04	28.27	101.2	104.4	101.8	95.8	97.6	99.3	1.05022	0.0254119	16438
P04117	Fabp4	Fatty acid-binding protein, adipocyte OS=Mus musculus OX=10090 GN=Fabp4 PE=1 SV=3	41	7	13	7	132	14.6	8.4	31.42	93.8	93.2	94.7	106.8	104.8	106.7	0.885014	9.91442e-05	11770
P35279	Rab6a	Ras-related protein Rab-6A OS=Mus musculus OX=10090 GN=Rab6a PE=1 SV=4	39	8	12	1	208	23.6	5.54	21.8	97.4	97.2	95.9	104.8	99.7	105.1	0.938307	0.0246839	19346
Q5SUH7	Clint1	Clathrin interactor 1 OS=Mus musculus OX=10090 GN=Clint1 PE=1 SV=1	17	10	14	10	623	67.7	6.42	20.35	98.3	96.5	95	101.6	103.9	104.5	0.934839	0.0066164	216705
H7BX88	Crat	Carnitine O-acetyltransferase OS=Mus musculus OX=10090 GN=Crat PE=1 SV=1	19	11	18	11	605	68.6	8.07	22.7	99.5	103.2	99.6	98.3	100.3	99.1	1.01545	0.319055	12908
Q01339	Apoh	Beta-2-glycoprotein 1 OS=Mus musculus OX=10090 GN=Apoh PE=1 SV=1	27	9	16	9	345	38.6	8.22	32.57	87.1	83.3	86.8	112.7	114.2	115.9	0.750292	4.87207e-05	11818
P10922	H1f0	Histone H1.0 OS=Mus musculus OX=10090 GN=H1f0 PE=2 SV=4	28	7	17	7	194	20.8	10.9	36.07	85.5	80.9	82.8	117	117.8	116	0.710376	1.89822e-05	14958
Q5SSL4	Abr	Active breakpoint cluster region-related protein OS=Mus musculus OX=10090 GN=Abr PE=1 SV=1	14	11	13	11	859	97.6	6.58	23.96	113.1	116.6	118	84.6	85.5	82.1	1.37867	5.70712e-05	109934
P63321	Rala	Ras-related protein Ral-A OS=Mus musculus OX=10090 GN=Rala PE=1 SV=1	28	5	10	4	206	23.5	7.11	25.88	88.6	95.1	85.2	102.5	123.6	105	0.812141	0.0461585	56044
Q99L45	Eif2s2	Eukaryotic translation initiation factor 2 subunit 2 OS=Mus musculus OX=10090 GN=Eif2s2 PE=1 SV=1	26	9	15	9	331	38.1	5.8	29.93	104.8	110.9	105.3	94.9	94.7	89.5	1.15013	0.0060925	67204
Z4YJW0	Emc1	ER membrane protein complex subunit 1 OS=Mus musculus OX=10090 GN=Emc1 PE=1 SV=1	11	11	15	11	997	111.5	7.43	25.38	104.2	102.5	105.7	97.6	90.3	99.8	1.08585	0.0524615	230866
D3YWF6	Otub1	Ubiquitin thioesterase OTUB1 OS=Mus musculus OX=10090 GN=Otub1 PE=1 SV=1	30	6	12	6	241	28	5.29	28.16	106.3	103.4	104.3	94.9	89.1	102	1.0979	0.0713187	107260
Q99L88	Sntb1	Beta-1-syntrophin OS=Mus musculus OX=10090 GN=Sntb1 PE=1 SV=4	20	11	15	9	537	58	8.31	25.16	78.1	78.3	82.1	122.8	116.2	122.5	0.659751	8.28123e-05	20649
P13634	Ca1	Carbonic anhydrase 1 OS=Mus musculus OX=10090 GN=Ca1 PE=1 SV=4	25	6	16	6	261	28.3	6.96	30.02	79	80.5	77.2	124.8	124	114.5	0.651528	0.000254421	-
D3Z0M9	Ddx23	DEAD (Asp-Glu-Ala-Asp) box polypeptide 23 OS=Mus musculus OX=10090 GN=Ddx23 PE=1 SV=1	16	12	14	12	819	95.4	9.58	24.85	110	109.8	113.3	87.5	89.9	89.4	1.2485	8.14815e-05	74351
Q8CGY8	Ogt	UDP-N-acetylglucosamine--peptide N-acetylglucosaminyltransferase 110 kDa subunit OS=Mus musculus OX=10090 GN=Ogt PE=1 SV=2	11	11	14	11	1046	116.9	6.7	23.3	104.4	105	106.3	93.8	96.8	93.8	1.11006	0.000808661	108155
Q9CZM2	Rpl15	60S ribosomal protein L15 OS=Mus musculus OX=10090 GN=Rpl15 PE=1 SV=4	40	9	19	9	204	24.1	11.62	30.95	104.1	103.4	104.7	96.1	99.6	92.2	1.0844	0.0202488	66480
Q923D2	Blvrb	Flavin reductase (NADPH) OS=Mus musculus OX=10090 GN=Blvrb PE=1 SV=3	40	7	18	7	206	22.2	7.01	43.02	92	90.9	90.7	107.2	110.5	108.7	0.838235	7.0405e-05	233016
Q91WT7	Akr1c14	3-alpha-hydroxysteroid dehydrogenase type 1 OS=Mus musculus OX=10090 GN=Akr1c14 PE=1 SV=1	28	6	11	6	323	37.2	7.2	20.88	83.6	79.8	80.8	123	114.7	118.2	0.686148	0.000151349	105387
Q8VHY0	Cspg4	Chondroitin sulfate proteoglycan 4 OS=Mus musculus OX=10090 GN=Cspg4 PE=1 SV=3	6	10	11	10	2327	252.2	5.44	20.34	88.6	92.3	97.4	107.9	110.4	103.5	0.864823	0.0111708	121021
Q61081	Cdc37	Hsp90 co-chaperone Cdc37 OS=Mus musculus OX=10090 GN=Cdc37 PE=1 SV=1	22	8	15	8	379	44.6	5.34	22.64	110.8	109	111.4	90.4	85.2	93.2	1.23214	0.00105906	12539
Q8VHE0	Sec63	Translocation protein SEC63 homolog OS=Mus musculus OX=10090 GN=Sec63 PE=1 SV=4	19	11	12	11	760	87.8	5.38	15.68	111.2	109.3	109.4	90.6	93	86.6	1.22095	0.000536311	140740
Q149F3	Gspt2	Eukaryotic peptide chain release factor GTP-binding subunit ERF3B OS=Mus musculus OX=10090 GN=Gspt2 PE=1 SV=1	14	8	11	1	632	69.1	5.2	21.87	102.4	117.1	96.4	91.3	107.9	84.8	1.11232	0.313271	14853
Q8K411	Pitrm1	Presequence protease, mitochondrial OS=Mus musculus OX=10090 GN=Pitrm1 PE=1 SV=1	14	13	16	13	1036	117.3	7.2	21.69	98.4	109.3	106.6	93.3	98	94.4	1.10011	0.0558475	69617
P63325	Rps10	40S ribosomal protein S10 OS=Mus musculus OX=10090 GN=Rps10 PE=1 SV=1	49	10	25	9	165	18.9	10.15	44.16	100.9	99.6	101.9	98.8	95.9	102.8	1.01647	0.481732	67097
P09542	Myl3	Myosin light chain 3 OS=Mus musculus OX=10090 GN=Myl3 PE=1 SV=4	35	7	12	6	204	22.4	5.1	21.63	39.8	41.8	42.1	163	151.6	161.6	0.259765	5.62035e-06	17897
P57722	Pcbp3	Poly(rC)-binding protein 3 OS=Mus musculus OX=10090 GN=Pcbp3 PE=1 SV=3	19	6	12	1	371	39.3	7.52	28.61	91	87.9	86.1	115.6	113.1	106.4	0.790809	0.00165303	59093
P46467	Vps4b	Vacuolar protein sorting-associated protein 4B OS=Mus musculus OX=10090 GN=Vps4b PE=1 SV=2	27	10	14	6	444	49.4	7.11	23.47	107.5	107.9	109.5	93.3	88.9	92.7	1.18188	0.000380123	20479
P70333	Hnrnph2	Heterogeneous nuclear ribonucleoprotein H2 OS=Mus musculus OX=10090 GN=Hnrnph2 PE=1 SV=1	23	9	17	2	449	49.2	6.3	27.44	99.5	119	113.7	86.3	87.4	94	1.24094	0.0269379	56258
P46978	Stt3a	Dolichyl-diphosphooligosaccharide--protein glycosyltransferase subunit STT3A OS=Mus musculus OX=10090 GN=Stt3a PE=1 SV=1	13	10	21	10	705	80.5	8.1	36.01	108.4	106.7	109.7	93.5	90.2	91.5	1.18023	0.000216514	16430
P49710	Hcls1	Hematopoietic lineage cell-specific protein OS=Mus musculus OX=10090 GN=Hcls1 PE=1 SV=2	24	12	16	12	486	54.2	4.84	26.31	117.9	119.4	115.2	81.1	82.7	83.6	1.42482	1.64653e-05	15163
Q3TW96	Uap1l1	UDP-N-acetylhexosamine pyrophosphorylase-like protein 1 OS=Mus musculus OX=10090 GN=Uap1l1 PE=1 SV=1	18	9	17	9	507	56.6	5.43	42.65	108	110.5	108.7	93.2	91.6	88	1.19941	0.000446069	227620
Q9Z1F9	Uba2	SUMO-activating enzyme subunit 2 OS=Mus musculus OX=10090 GN=Uba2 PE=1 SV=1	18	10	18	10	638	70.5	5.24	25.97	106.8	105.8	105.4	91.7	99.2	91.2	1.12726	0.0102895	50995
Q9Z2G6	Sel1l	Protein sel-1 homolog 1 OS=Mus musculus OX=10090 GN=Sel1l PE=1 SV=2	12	9	12	9	790	88.3	5.57	19.78	118.8	115.8	118.4	83.3	81.2	82.5	1.42915	6.06002e-06	20338
P97310	Mcm2	DNA replication licensing factor MCM2 OS=Mus musculus OX=10090 GN=Mcm2 PE=1 SV=3	12	10	13	10	904	102	5.72	28.38	127.4	124.7	125	73.3	75.1	74.7	1.69027	9.10381e-07	17216
O55042	Snca	Alpha-synuclein OS=Mus musculus OX=10090 GN=Snca PE=1 SV=2	56	7	8	7	140	14.5	4.77	22.88	69.3	70.2	70.5	132	127.5	130.5	0.538462	1.63062e-06	20617
Q64523	Hist2h2ac	Histone H2A type 2-C OS=Mus musculus OX=10090 GN=Hist2h2ac PE=1 SV=3	63	7	27	3	129	14	10.9	44.09	107.2	103.7	98.4	94.2	102.6	94.1	1.06325	0.182271	-
Q07113	Igf2r	Cation-independent mannose-6-phosphate receptor OS=Mus musculus OX=10090 GN=Igf2r PE=1 SV=1	7	15	16	15	2483	273.6	5.71	20.53	104.2	107.7	110.5	88.3	97.2	92	1.1618	0.00906013	16004
P50171	Hsd17b8	Estradiol 17-beta-dehydrogenase 8 OS=Mus musculus OX=10090 GN=Hsd17b8 PE=1 SV=2	29	5	7	5	259	26.6	6.54	20.61	91.2	91.3	91.2	106.7	106.9	112.8	0.838542	0.000928562	-
P46638	Rab11b	Ras-related protein Rab-11B OS=Mus musculus OX=10090 GN=Rab11b PE=1 SV=3	28	6	17	6	218	24.5	5.94	23.87	100	103.5	96.8	93.8	108.2	97.8	1.00167	0.973454	19326
D3YV69	Rab6a	Ras-related protein Rab-6A OS=Mus musculus OX=10090 GN=Rab6a PE=1 SV=1	53	8	12	1	175	19.9	5.07	20.85							#DIV/0!	#DIV/0!	19346
P56399	Usp5	Ubiquitin carboxyl-terminal hydrolase 5 OS=Mus musculus OX=10090 GN=Usp5 PE=1 SV=1	14	9	13	9	858	95.8	5.01	22.59	108.8	108.8	107.2	91.8	92.9	90.4	1.18066	5.09707e-05	22225
Q91YI0	Asl	Argininosuccinate lyase OS=Mus musculus OX=10090 GN=Asl PE=1 SV=1	23	10	12	10	464	51.7	6.96	22.07	95.8	95.8	95	106.2	102.1	105.1	0.914486	0.00205179	109900
E9Q2M9	Wdfy4	WD repeat and FYVE domain-containing 4 OS=Mus musculus OX=10090 GN=Wdfy4 PE=1 SV=2	4	12	13	12	3183	354.1	6.34	21.29	114.4	117.5	113.2	81.5	92.2	81.2	1.35386	0.00143348	545030
Q6GQT9	Nomo1	Nodal modulator 1 OS=Mus musculus OX=10090 GN=Nomo1 PE=1 SV=1	12	12	15	12	1214	133.3	6.09	17.59	104.4	104	106.4	94.6	92.5	98.1	1.10379	0.00533013	211548
P24063	Itgal	Integrin alpha-L OS=Mus musculus OX=10090 GN=Itgal PE=1 SV=2	13	12	12	12	1163	128.2	6.11	15.13	122.1	125.5	123.4	74.2	77.4	77.3	1.6208	5.14702e-06	16408
Q61166	Mapre1	Microtubule-associated protein RP/EB family member 1 OS=Mus musculus OX=10090 GN=Mapre1 PE=1 SV=3	28	6	13	4	268	30	5.22	25.69	104.2	105.5	111.6	90.1	91.6	97	1.15285	0.0101479	13589
A0A1B0GRU8	Prpf40a	Pre-mRNA-processing factor 40 homolog A OS=Mus musculus OX=10090 GN=Prpf40a PE=1 SV=1	11	10	14	10	926	105.5	7.99	17.27	120.7	115.3	117.7	81.2	80.4	84.7	1.43605	6.25565e-05	56194
P61089	Ube2n	Ubiquitin-conjugating enzyme E2 N OS=Mus musculus OX=10090 GN=Ube2n PE=1 SV=1	39	6	13	6	152	17.1	6.57	14.61	118.3	115.9	115.1	83.1	84.1	83.4	1.39385	5.21455e-06	93765
Q99P72	Rtn4	Reticulon-4 OS=Mus musculus OX=10090 GN=Rtn4 PE=1 SV=2	8	5	12	5	1162	126.5	4.54	25.85	93	95.8	96	99.4	109.3	106.6	0.903267	0.0307963	68585
P27601	Gna13	Guanine nucleotide-binding protein subunit alpha-13 OS=Mus musculus OX=10090 GN=Gna13 PE=1 SV=1	24	11	16	9	377	44	8.21	31.7	94.2	89.8	95.9	106.1	107.8	106.2	0.874414	0.00212773	14674
Q8BG32	Psmd11	26S proteasome non-ATPase regulatory subunit 11 OS=Mus musculus OX=10090 GN=Psmd11 PE=1 SV=3	23	10	15	10	422	47.4	6.48	25.26	109.3	104.8	106.2	96.8	85.7	97.2	1.14516	0.0276158	69077
P08103	Hck	Tyrosine-protein kinase HCK OS=Mus musculus OX=10090 GN=Hck PE=1 SV=4	17	8	14	6	524	59.1	7.24	27.01	100.8	107.8	107.2	93.5	99.6	91.1	1.11119	0.0356256	15162
Q7TQK5	Ccdc93	Coiled-coil domain-containing protein 93 OS=Mus musculus OX=10090 GN=Ccdc93 PE=1 SV=1	19	11	12	11	629	72.6	8.29	22.04	111.2	110.3	108.4	90	90.4	89.7	1.2214	1.95852e-05	70829
A0A140T8T7	Col6a5	Collagen alpha-5(VI) chain OS=Mus musculus OX=10090 GN=Col6a5 PE=1 SV=1	5	14	15	14	2640	289.3	6.67	22.25	133	133	141.6	61.5	65.6	65.3	2.1185	2.21874e-05	665033
O35857	Timm44	Mitochondrial import inner membrane translocase subunit TIM44 OS=Mus musculus OX=10090 GN=Timm44 PE=1 SV=2	19	8	11	8	452	51.1	8.13	22.92	101.2	103.1	100.7	93.7	104.1	97.2	1.0339	0.348475	21856
Q9DBS5	Klc4	Kinesin light chain 4 OS=Mus musculus OX=10090 GN=Klc4 PE=1 SV=1	16	8	10	4	619	68.6	6.09	22.29	90.6	91.1	94	106.2	105.3	112.7	0.850401	0.00321971	74764
P62334	Psmc6	26S proteasome regulatory subunit 10B OS=Mus musculus OX=10090 GN=Psmc6 PE=1 SV=1	24	8	11	8	389	44.1	7.49	19.25	110.4	106.3	110.3	91.6	89.7	91.8	1.19736	0.000283568	67089
P62281	Rps11	40S ribosomal protein S11 OS=Mus musculus OX=10090 GN=Rps11 PE=1 SV=3	23	4	13	4	158	18.4	10.3	35.59	101.9	97	97.6	101.7	99.4	102.3	0.977258	0.265512	27207
Q8CJG0	Ago2	Protein argonaute-2 OS=Mus musculus OX=10090 GN=Ago2 PE=1 SV=3	20	14	16	11	860	97.2	9.19	17.45	99.9	99.7	101.6	96.6	103.5	98.7	1.00803	0.726191	239528
Q07417	Acads	Short-chain specific acyl-CoA dehydrogenase, mitochondrial OS=Mus musculus OX=10090 GN=Acads PE=1 SV=2	20	6	12	6	412	44.9	8.47	22.27	100.3	100.2	93	99.9	109.3	97.3	0.957586	0.37784	11409
P21956	Mfge8	Lactadherin OS=Mus musculus OX=10090 GN=Mfge8 PE=1 SV=3	26	11	13	11	463	51.2	6.52	19.21	100.7	100.5	102.1	101.6	96.5	98.6	1.02224	0.232049	17304
O09044	Snap23	Synaptosomal-associated protein 23 OS=Mus musculus OX=10090 GN=Snap23 PE=1 SV=1	32	5	9	5	210	23.2	4.98	24.68	101.3	103.3	101.9	97.4	99.6	96.4	1.04465	0.0173297	20619
Q61414	Krt15	Keratin, type I cytoskeletal 15 OS=Mus musculus OX=10090 GN=Krt15 PE=1 SV=2	18	10	19	3	452	49.1	4.86	38.57	32.4	34.4	36.3	162.1	175.6	159.2	0.207486	1.43676e-05	16665
P28867	Prkcd	Protein kinase C delta type OS=Mus musculus OX=10090 GN=Prkcd PE=1 SV=3	16	13	14	13	674	77.5	7.39	19.88	127.2	122.5	120.7	76.1	76.2	77.4	1.61254	1.89167e-05	18753
O70456	Sfn	14-3-3 protein sigma OS=Mus musculus OX=10090 GN=Sfn PE=1 SV=2	33	8	16	4	248	27.7	4.78	34.89	110.2	109.8	108.8	92	88.1	91.1	1.21239	0.000104923	55948
P28660	Nckap1	Nck-associated protein 1 OS=Mus musculus OX=10090 GN=Nckap1 PE=1 SV=2	12	13	16	13	1128	128.7	6.62	20.63	92.2	93.1	90.2	107.3	112.1	105.1	0.848998	0.00187195	50884
Q62165	Dag1	Dystroglycan OS=Mus musculus OX=10090 GN=Dag1 PE=1 SV=4	12	9	11	9	893	96.8	8.44	21.48	85.6	86.7	86.8	111.3	119.9	109.7	0.760047	0.00102894	13138
A0A0A0MQD5	Shank3	SH3 and multiple ankyrin repeat domains protein 3 OS=Mus musculus OX=10090 GN=Shank3 PE=1 SV=1	8	12	14	12	1805	192.1	8.9	23.37	82.3	89.2	87	111	115.6	114.9	0.756955	0.000371959	58234
Q8BIJ7	Rufy1	RUN and FYVE domain-containing protein 1 OS=Mus musculus OX=10090 GN=Rufy1 PE=1 SV=1	14	10	13	9	712	80.3	5.68	26.06	98.8	100.8	102.2	103.5	94.8	99.9	1.01207	0.680784	216724
Q91YR9	Ptgr1	Prostaglandin reductase 1 OS=Mus musculus OX=10090 GN=Ptgr1 PE=1 SV=2	25	8	12	8	329	35.5	7.96	23.31	115.3	111.7	111.6	89.9	84.4	87.1	1.29533	0.000210606	67103
Q9ESX5	Dkc1	H/ACA ribonucleoprotein complex subunit DKC1 OS=Mus musculus OX=10090 GN=Dkc1 PE=1 SV=4	24	12	14	12	509	57.4	9.28	21.2	109.3	102.1	108.2	96.2	88.2	96	1.1398	0.0194433	245474
O35887	Calu	Calumenin OS=Mus musculus OX=10090 GN=Calu PE=1 SV=1	35	9	12	9	315	37	4.67	16.98	110.2	107.6	110.3	93.3	88.2	90.4	1.20669	0.000404459	12321
P10518	Alad	Delta-aminolevulinic acid dehydratase OS=Mus musculus OX=10090 GN=Alad PE=1 SV=1	21	5	10	5	330	36	6.79	21.6	107.3	107	101	94.9	95.7	94.1	1.10748	0.00834053	17025
P47941	Crkl	Crk-like protein OS=Mus musculus OX=10090 GN=Crkl PE=1 SV=2	43	10	13	10	303	33.8	6.74	26.16	101.7	109.2	107.4	91.8	95.2	94.7	1.12993	0.00812237	12929
P54822	Adsl	Adenylosuccinate lyase OS=Mus musculus OX=10090 GN=Adsl PE=1 SV=2	16	6	11	6	484	54.8	7.27	23.78	100.4	97.7	97.2	101.4	103	100.3	0.96915	0.0685485	11564
Q9DCX2	Atp5h	ATP synthase subunit d, mitochondrial OS=Mus musculus OX=10090 GN=Atp5h PE=1 SV=3	40	8	12	8	161	18.7	5.69	21.63	101.8	98.6	96.7	102.6	101.4	99	0.980528	0.342098	71679
Q5SQX6	Cyfip2	Cytoplasmic FMR1-interacting protein 2 OS=Mus musculus OX=10090 GN=Cyfip2 PE=1 SV=2	10	11	13	4	1253	145.6	7.05	26.46	106.9	109.4	112.8	97.6	88.5	84.7	1.21529	0.00976288	76884
Q6P1J1	Crmp1	Crmp1 protein OS=Mus musculus OX=10090 GN=Crmp1 PE=1 SV=1	6	3	10	1	686	74.2	6.81	26.79	88.6	105.7	112.7	111.3	84.7	96.9	1.04814	0.67771	12933
E9PUW7	Xpo7	Exportin-7 OS=Mus musculus OX=10090 GN=Xpo7 PE=1 SV=1	10	10	13	10	1088	123.8	6.38	20.9	101.5	105.1	102	96.9	103.9	90.5	1.05939	0.225696	65246
P70663	Sparcl1	SPARC-like protein 1 OS=Mus musculus OX=10090 GN=Sparcl1 PE=1 SV=3	13	7	13	7	650	72.2	4.6	25.99	79.7	88.6	89.5	108	125.5	108.6	0.753581	0.0126343	13602
Q3UZG4	Aimp1	Aminoacyl tRNA synthase complex-interacting multifunctional protein 1 OS=Mus musculus OX=10090 GN=Aimp1 PE=1 SV=1	35	7	10	7	319	35.1	8.57	20.97	85.6	95.5	111.6	90.3	90.7	126.3	0.952489	0.747973	13722
P60766	Cdc42	Cell division control protein 42 homolog OS=Mus musculus OX=10090 GN=Cdc42 PE=1 SV=2	34	6	17	5	191	21.2	6.55	29.41	104.8	113.5	106.4	90.5	89	95.8	1.17944	0.00818105	12540
Q64444	Ca4	Carbonic anhydrase 4 OS=Mus musculus OX=10090 GN=Ca4 PE=1 SV=1	26	8	11	8	305	34.3	8.21	25.04	71.7	69	71.9	135.6	118.3	133.6	0.548645	0.000462208	-
P47963	Rpl13	60S ribosomal protein L13 OS=Mus musculus OX=10090 GN=Rpl13 PE=1 SV=3	45	11	19	11	211	24.3	11.55	26.93	103.6	103.4	100.9	94.7	100.2	97.1	1.05445	0.0431365	270106
P63330	Ppp2ca	Serine/threonine-protein phosphatase 2A catalytic subunit alpha isoform OS=Mus musculus OX=10090 GN=Ppp2ca PE=1 SV=1	35	9	14	9	309	35.6	5.54	23.02	99.8	100.8	102.3	101	96	100.1	1.01952	0.319341	19052
P15947	Klk1	Kallikrein-1 OS=Mus musculus OX=10090 GN=Klk1 PE=1 SV=3	30	7	14	7	261	28.8	5.12	17.65	35.5	36.5	33.2	165.9	160.3	168.6	0.212611	1.00995e-06	16612
Q61176	Arg1	Arginase-1 OS=Mus musculus OX=10090 GN=Arg1 PE=1 SV=1	30	8	16	8	323	34.8	7.01	26.27	149.2	143	148	53.6	52.8	53.5	2.75297	1.05617e-06	11846
P62245	Rps15a	40S ribosomal protein S15a OS=Mus musculus OX=10090 GN=Rps15a PE=1 SV=2	58	7	15	7	130	14.8	10.13	25.27	107.3	102.3	107.5	98.4	87.8	96.7	1.12089	0.0369197	267019
Q64345	Ifit3	Interferon-induced protein with tetratricopeptide repeats 3 OS=Mus musculus OX=10090 GN=Ifit3 PE=1 SV=1	26	11	13	10	403	47.2	5.64	28.05	124.4	126.6	128.1	72.6	75	73.3	1.71616	2.1353e-06	15959
P43883	Plin2	Perilipin-2 OS=Mus musculus OX=10090 GN=Plin2 PE=1 SV=2	28	10	11	10	425	46.6	6.87	21.88	103.9	107.4	112.2	87.5	86.2	102.8	1.16998	0.0552793	11520
Q9JK88	Serpini2	Serpin I2 OS=Mus musculus OX=10090 GN=Serpini2 PE=1 SV=1	21	9	13	9	405	45.7	6.15	24.56	37.9	37.9	39.8	163.7	156.9	163.8	0.238646	8.26386e-07	67931
Q08857	Cd36	Platelet glycoprotein 4 OS=Mus musculus OX=10090 GN=Cd36 PE=1 SV=2	17	8	19	8	472	52.7	8.35	44.92	77.7	75.6	76.6	126.2	121.3	122.6	0.621183	7.89923e-06	12491
P84228	Hist1h3b	Histone H3.2 OS=Mus musculus OX=10090 GN=Hist1h3b PE=1 SV=2	60	9	48	3	136	15.4	11.27	91.75	118.8	117	116.7	81.5	84.5	81.5	1.42424	8.11295e-06	-
Q921M7	Fam49b	Protein FAM49B OS=Mus musculus OX=10090 GN=Fam49b PE=1 SV=1	40	11	11	10	324	36.8	6.06	22.45	132.9	125	125.2	68.4	76.3	72.3	1.76544	8.90689e-05	-
Q9QWR8	Naga	Alpha-N-acetylgalactosaminidase OS=Mus musculus OX=10090 GN=Naga PE=1 SV=2	17	7	16	7	415	47.2	6.44	30.12	114.9	109.9	111.8	87.1	89.7	86.5	1.27839	0.000155126	17939
P70268	Pkn1	Serine/threonine-protein kinase N1 OS=Mus musculus OX=10090 GN=Pkn1 PE=1 SV=3	11	10	11	8	946	104.3	6.27	22.61	96.6	105.2	102.5	90.4	102.8	102.4	1.02943	0.578	320795
Q9WTR5	Cdh13	Cadherin-13 OS=Mus musculus OX=10090 GN=Cdh13 PE=1 SV=2	11	7	9	7	714	78.1	5.12	20.75	74.6	73	70.6	124.6	127	130.2	0.571503	1.06632e-05	12554
B9EJ54	Nup205	MCG21756, isoform CRA_b OS=Mus musculus OX=10090 GN=Nup205 PE=1 SV=1	6	10	11	10	2008	227.3	6.34	21.04	109.5	109.4	107.6	85.2	100.2	88.1	1.19378	0.018913	70699
Q80W21	Gstm7	Glutathione S-transferase Mu 7 OS=Mus musculus OX=10090 GN=Gstm7 PE=1 SV=1	28	7	14	1	218	25.7	6.8	32.55	48.3	48.9	48.7	153.1	150.7	150.3	0.321295	3.40744e-08	68312
B2RSH2	Gnai1	Guanine nucleotide-binding protein G(i) subunit alpha-1 OS=Mus musculus OX=10090 GN=Gnai1 PE=1 SV=1	32	11	16	3	354	40.3	5.97	32.3	88.7	95.1	84.2	109.9	117	105	0.807472	0.0105995	14677
B1AQF4	Dusp3	Dual-specificity protein phosphatase 3 OS=Mus musculus OX=10090 GN=Dusp3 PE=1 SV=1	30	4	7	4	210	23.2	7.31	18.49	95.1	98.8	89.9	103.3	105.5	107.4	0.897533	0.0190616	72349
P31428	Dpep1	Dipeptidase 1 OS=Mus musculus OX=10090 GN=Dpep1 PE=1 SV=2	17	7	15	7	410	45.7	6.37	33.18	81.7	79.8	78	122.1	120.2	118.2	0.664355	1.30273e-05	13479
O35250	Exoc7	Exocyst complex component 7 OS=Mus musculus OX=10090 GN=Exoc7 PE=1 SV=2	14	9	12	9	697	79.9	6.98	20.19	99.3	100.4	99.1	102	95.3	103.9	0.992032	0.776928	53413
P35550	Fbl	rRNA 2'-O-methyltransferase fibrillarin OS=Mus musculus OX=10090 GN=Fbl PE=1 SV=2	25	8	15	7	327	34.3	10.24	23.66	105.7	104	103.8	95.3	94.9	96.3	1.09424	0.000252143	14113
Q91Z53	Grhpr	Glyoxylate reductase/hydroxypyruvate reductase OS=Mus musculus OX=10090 GN=Grhpr PE=1 SV=1	24	6	12	6	328	35.3	7.65	30.16	88.3	91.7	92.6	113.6	102.2	111.6	0.832621	0.00821624	76238
Q60520	Sin3a	Paired amphipathic helix protein Sin3a OS=Mus musculus OX=10090 GN=Sin3a PE=1 SV=3	12	11	12	11	1274	145	7.25	14.56	101.7	102.1	101.7	95.9	98.4	100.2	1.03735	0.0430603	20466
Q8CCK0	H2afy2	Core histone macro-H2A.2 OS=Mus musculus OX=10090 GN=H2afy2 PE=1 SV=3	35	12	14	11	372	40.1	9.69	14.92	82.7	80.2	82.4	126	109.9	118.7	0.691765	0.00151723	-
Q8R0X7	Sgpl1	Sphingosine-1-phosphate lyase 1 OS=Mus musculus OX=10090 GN=Sgpl1 PE=1 SV=1	16	9	12	9	568	63.6	9.1	22.52	118.1	120.7	129.1	75.4	75.8	80.9	1.58509	0.000273495	20397
Q9WUD0	Cyp2b10	Cytochrome P450 2B10 OS=Mus musculus OX=10090 GN=Cyp2b10 PE=1 SV=1	14	7	15	7	491	55.8	7.83	32.96	76.7	78.6	77.7	119.7	125.9	121.4	0.634877	2.06271e-05	13088
O70250	Pgam2	Phosphoglycerate mutase 2 OS=Mus musculus OX=10090 GN=Pgam2 PE=1 SV=3	18	5	12	3	253	28.8	8.5	22.45	61.2	66.8	63.1	130.6	130.3	147.9	0.467466	0.000276067	56012
Q9DBP5	Cmpk1	UMP-CMP kinase OS=Mus musculus OX=10090 GN=Cmpk1 PE=1 SV=1	34	6	14	6	196	22.2	5.83	24.14	118.1	119.4	114.7	82.3	80	85.5	1.42131	8.10675e-05	66588
Q9D6J6	Ndufv2	NADH dehydrogenase [ubiquinone] flavoprotein 2, mitochondrial OS=Mus musculus OX=10090 GN=Ndufv2 PE=1 SV=2	41	8	13	8	248	27.3	7.4	31.04	96.9	98	97.8	107.2	93.8	106.3	0.952489	0.32468	72900
Q8BHL4	Gprc5a	Retinoic acid-induced protein 3 OS=Mus musculus OX=10090 GN=Gprc5a PE=1 SV=1	15	4	14	4	356	40.1	7.62	23.5	77	78.1	75.6	124.1	126.3	118.9	0.624695	3.68909e-05	232431
Q8BFU2	Hist3h2a	Histone H2A type 3 OS=Mus musculus OX=10090 GN=Hist3h2a PE=1 SV=3	60	6	26	1	130	14.1	11.05	49.45	110.3	109.6	99.7	78.3	124.3	77.9	1.13939	0.455152	-
Q9JLI8	Sart3	Squamous cell carcinoma antigen recognized by T-cells 3 OS=Mus musculus OX=10090 GN=Sart3 PE=1 SV=1	10	10	11	10	962	109.6	5.24	24.23	113.5	109.1	107.4	86.9	91.1	92	1.22222	0.00113818	53890
P54775	Psmc4	26S proteasome regulatory subunit 6B OS=Mus musculus OX=10090 GN=Psmc4 PE=1 SV=2	20	9	17	9	418	47.4	5.21	23.59	102.9	106.7	106.8	94	90	99.6	1.11566	0.0234539	23996
Q9R1T4	Sept6	Septin-6 OS=Mus musculus OX=10090 GN=Sept6 PE=1 SV=4	25	10	16	5	434	49.6	6.43	19.15	129.8	124.2	121.1	73.5	75	76.4	1.66785	4.83308e-05	#N/A
Q8R420	Abca3	ATP-binding cassette sub-family A member 3 OS=Mus musculus OX=10090 GN=Abca3 PE=1 SV=3	5	9	13	9	1704	191.8	7.17	25.15	110.4	116.1	111.4	89.4	90.4	82.2	1.28969	0.00126348	27410
O54984	Asna1	ATPase Asna1 OS=Mus musculus OX=10090 GN=Asna1 PE=1 SV=2	32	8	16	8	348	38.8	4.91	14.68	107.8	109.3	112.1	89	89.5	92.3	1.21566	0.000278613	-
E9Q4K7	Kif13b	Kinesin family member 13B OS=Mus musculus OX=10090 GN=Kif13b PE=1 SV=1	7	9	11	8	1843	204.4	5.8	19.09	105.4	104.5	102.1	98.2	97.1	92.7	1.08333	0.014762	16554
Q9CYN2	Spcs2	Signal peptidase complex subunit 2 OS=Mus musculus OX=10090 GN=Spcs2 PE=1 SV=1	41	9	12	9	226	25	8.57	22.88	123.5	114.4	118.3	83.3	78.2	82.3	1.46103	0.000256493	66624
D3Z6Q9	Bin2	Bridging integrator 2 OS=Mus musculus OX=10090 GN=Bin2 PE=1 SV=1	18	9	12	7	489	52.5	5.34	25.75	111.9	112.6	112.3	88	87.3	88	1.27915	1.51893e-07	668218
Q3UHU8	Gtf2i	General transcription factor II-I OS=Mus musculus OX=10090 GN=Gtf2i PE=1 SV=1	12	10	11	10	962	108.3	7.8	21.73	97.5	104.2	95.8	100.4	103.6	98.5	0.983471	0.603998	14886
P04104	Krt1	Keratin, type II cytoskeletal 1 OS=Mus musculus OX=10090 GN=Krt1 PE=1 SV=4	6	6	11	2	637	65.6	8.15	25.57	90.2	85	95.3	119.3	90	120.4	0.820443	0.13034	16678
Q6PGC1	Dhx29	ATP-dependent RNA helicase DHX29 OS=Mus musculus OX=10090 GN=Dhx29 PE=1 SV=1	10	12	12	12	1365	153.9	7.94	16.52	107.4	105.8	103.6	92.2	95.8	95.3	1.11825	0.0020904	218629
P05201	Got1	Aspartate aminotransferase, cytoplasmic OS=Mus musculus OX=10090 GN=Got1 PE=1 SV=3	20	8	14	8	413	46.2	7.14	24.43	107.8	107.4	115.5	93.2	81.3	94.7	1.22845	0.014769	14718
P15327	Bpgm	Bisphosphoglycerate mutase OS=Mus musculus OX=10090 GN=Bpgm PE=1 SV=2	28	7	13	7	259	30	7.06	29.69	84.6	83	83.2	118.2	115.3	115.7	0.718213	5.96934e-06	12183
Q64442	Sord	Sorbitol dehydrogenase OS=Mus musculus OX=10090 GN=Sord PE=1 SV=3	29	9	14	9	357	38.2	7.02	23.73	87.2	87.3	85.6	114.2	114.3	111.3	0.76545	1.92297e-05	20322
Q9WVJ2	Psmd13	26S proteasome non-ATPase regulatory subunit 13 OS=Mus musculus OX=10090 GN=Psmd13 PE=1 SV=1	22	9	11	9	376	42.8	5.71	24.18	109.9	109.3	108.7	92.9	88.2	91	1.20507	0.000189877	23997
P16330	Cnp	2',3'-cyclic-nucleotide 3'-phosphodiesterase OS=Mus musculus OX=10090 GN=Cnp PE=1 SV=3	18	8	11	8	420	47.1	8.97	20.61	100.8	107.3	106.4	92.4	99.5	93.6	1.10158	0.0319328	12799
G3UXT7	Fus	RNA-binding protein FUS (Fragment) OS=Mus musculus OX=10090 GN=Fus PE=1 SV=1	40	6	11	4	130	14	8.97	22.64	104.3	95.8	102.2	105.4	104.3	87.9	1.01579	0.813242	233908
P21550	Eno3	Beta-enolase OS=Mus musculus OX=10090 GN=Eno3 PE=1 SV=3	23	9	11	6	434	47	7.18	18.45	59.9	59.2	59.4	145.8	128.2	147.6	0.423387	0.000196837	13808
O70310	Nmt1	Glycylpeptide N-tetradecanoyltransferase 1 OS=Mus musculus OX=10090 GN=Nmt1 PE=1 SV=1	13	7	11	5	496	56.9	8	23.21	105.7	104.2	104.9	94.3	97	93.9	1.10379	0.000756566	18107
Q61029	Tmpo	Lamina-associated polypeptide 2, isoforms beta/delta/epsilon/gamma OS=Mus musculus OX=10090 GN=Tmpo PE=1 SV=4	26	8	14	5	452	50.3	9.45	21.03	94.5	97.1	93.3	109	101	105.1	0.904157	0.0172367	21917
Q99020	Hnrnpab	Heterogeneous nuclear ribonucleoprotein A/B OS=Mus musculus OX=10090 GN=Hnrnpab PE=1 SV=1	24	6	11	5	285	30.8	7.91	29.74	110.4	109.5	109.6	91.2	90.9	88.5	1.21766	2.6198e-05	15384
E9PWE9	Syk	Tyrosine-protein kinase OS=Mus musculus OX=10090 GN=Syk PE=1 SV=1	22	10	13	10	583	66	7.15	23.46	139.9	137.7	136.8	64.3	58.9	62.5	2.23156	2.00716e-06	20963
Q99LD8	Ddah2	N(G),N(G)-dimethylarginine dimethylaminohydrolase 2 OS=Mus musculus OX=10090 GN=Ddah2 PE=1 SV=1	32	9	12	8	285	29.6	6.01	20.9	85.8	83	81	118.1	113.4	118.8	0.713103	0.000107238	51793
Q06138	Cab39	Calcium-binding protein 39 OS=Mus musculus OX=10090 GN=Cab39 PE=1 SV=2	28	10	15	6	341	39.8	6.89	27.61	97.6	91.4	98.6	108.9	99	104.5	0.920615	0.0858105	12283
P97742	Cpt1a	Carnitine O-palmitoyltransferase 1, liver isoform OS=Mus musculus OX=10090 GN=Cpt1a PE=1 SV=4	15	12	16	12	773	88.2	8.62	29.65	105.7	108.4	105.6	93.3	94.7	92.3	1.14056	0.000336913	12894
Q6P1B9	Bin1	Bin1 protein OS=Mus musculus OX=10090 GN=Bin1 PE=1 SV=1	18	9	13	7	477	52.7	5.24	26.89	94.2	93	92.9	105.3	109.9	104.6	0.87586	0.00151509	30948
A2AJ28	Clic3	Chloride intracellular channel protein OS=Mus musculus OX=10090 GN=Clic3 PE=1 SV=1	35	6	12	6	235	26.6	6.28	21.72	89.6	89.3	87.8	110.4	111.6	111.3	0.80018	4.75406e-06	69454
Q99LB7	Sardh	Sarcosine dehydrogenase, mitochondrial OS=Mus musculus OX=10090 GN=Sardh PE=1 SV=1	15	11	12	11	919	101.6	6.74	20.81	60.5	70.7	67.4	126.8	143.2	131.5	0.494645	0.000294368	192166
P00687	Amy1	Alpha-amylase 1 OS=Mus musculus OX=10090 GN=Amy1 PE=1 SV=2	17	8	28	2	511	57.6	6.96	60.58	78.4	86.5	78.2	113.4	120.5	123.1	0.680952	0.00067746	11722
Q9WV02	Rbmx	RNA-binding motif protein, X chromosome OS=Mus musculus OX=10090 GN=Rbmx PE=1 SV=1	27	11	18	2	391	42.3	10.05	20.27	100.9	100.5	101.1	98.1	99.9	99.5	1.01681	0.0438451	19655
P59999	Arpc4	Actin-related protein 2/3 complex subunit 4 OS=Mus musculus OX=10090 GN=Arpc4 PE=1 SV=3	46	7	14	7	168	19.7	8.43	24.51	125.1	124.2	123.4	74.2	79.5	73.7	1.63896	1.46482e-05	68089
P47199	Cryz	Quinone oxidoreductase OS=Mus musculus OX=10090 GN=Cryz PE=1 SV=1	28	8	12	8	331	35.2	8.07	19.29	92.1	89.8	92.8	112.4	106.9	106	0.844451	0.00154518	12972
G5E8G6	Myo5b	Myosin Vb, isoform CRA_c OS=Mus musculus OX=10090 GN=Myo5b PE=1 SV=1	8	13	13	9	1818	210.4	7.09	19.46	96.9	99	100.8	106.9	93.2	103.2	0.978239	0.631565	17919
P14115	Rpl27a	60S ribosomal protein L27a OS=Mus musculus OX=10090 GN=Rpl27a PE=1 SV=5	41	6	16	6	148	16.6	11.12	34.4	95.6	95.1	96.5	113.5	89.1	110.3	0.917865	0.326421	26451
A2AL50	Agps	Alkylglycerone-phosphate synthase OS=Mus musculus OX=10090 GN=Agps PE=1 SV=1	16	9	9	9	671	74.3	7.66	22.57	118.4	117.2	117	82.1	85.6	79.6	1.4258	4.02539e-05	228061
O08807	Prdx4	Peroxiredoxin-4 OS=Mus musculus OX=10090 GN=Prdx4 PE=1 SV=1	38	8	20	6	274	31	7.15	34.92	107.8	123.6	114.1	84.9	87.4	82.1	1.3581	0.00329565	53381
Q99L04	Dhrs1	Dehydrogenase/reductase SDR family member 1 OS=Mus musculus OX=10090 GN=Dhrs1 PE=1 SV=1	32	9	12	9	313	34	8.35	23.08	113.5	115.9	107.8	87.5	85.9	89.3	1.28359	0.000666256	52585
Q9JLV6	Pnkp	Bifunctional polynucleotide phosphatase/kinase OS=Mus musculus OX=10090 GN=Pnkp PE=1 SV=2	20	10	13	10	522	57.2	7.9	21.87	111.9	109.4	113.4	90.2	82.1	92.9	1.26207	0.00255605	59047
Q9D964	Gatm	Glycine amidinotransferase, mitochondrial OS=Mus musculus OX=10090 GN=Gatm PE=1 SV=1	25	8	15	8	423	48.3	7.88	26.51	104	102.1	97	102.4	100.1	94.4	1.02088	0.549496	67092
Q9Z2X1	Hnrnpf	Heterogeneous nuclear ribonucleoprotein F OS=Mus musculus OX=10090 GN=Hnrnpf PE=1 SV=3	25	8	12	8	415	45.7	5.49	24.7	110.2	108.8	109.3	92.5	89.2	90.1	1.20787	6.04403e-05	98758
Q91VM9	Ppa2	Inorganic pyrophosphatase 2, mitochondrial OS=Mus musculus OX=10090 GN=Ppa2 PE=1 SV=1	29	10	16	10	330	38.1	6.98	27.11	96.1	96	95.5	103.9	103.2	105.2	0.920909	0.00017962	74776
Q8BYA0	Tbcd	Tubulin-specific chaperone D OS=Mus musculus OX=10090 GN=Tbcd PE=1 SV=1	8	9	11	9	1196	133.2	6.51	22.03	93.4	102.7	98.8	102.8	104.6	97.6	0.966885	0.380245	108903
O35295	Purb	Transcriptional activator protein Pur-beta OS=Mus musculus OX=10090 GN=Purb PE=1 SV=3	37	9	11	9	324	33.9	5.43	21.73	100.6	97.2	100.2	98.3	103.5	100.2	0.986755	0.513057	19291
Q6PAM1	Txlna	Alpha-taxilin OS=Mus musculus OX=10090 GN=Txlna PE=1 SV=1	12	6	10	6	554	62.3	6.74	19.91	107.9	109	108.1	92.8	91.1	91.2	1.18139	1.35446e-05	109658
Q63961	Eng	Endoglin OS=Mus musculus OX=10090 GN=Eng PE=1 SV=2	18	10	11	10	653	70	6.2	21.32	83.1	82.5	80.7	118.8	121.2	113.7	0.696353	0.000103966	13805
A2BE93	Set	Protein SET (Fragment) OS=Mus musculus OX=10090 GN=Set PE=1 SV=1	40	8	11	8	215	24.9	5.55	19.44	106.7	105.7	104.9	95.4	92.5	94.7	1.12279	0.000340935	56086
Q9D0K2	Oxct1	Succinyl-CoA:3-ketoacid coenzyme A transferase 1, mitochondrial OS=Mus musculus OX=10090 GN=Oxct1 PE=1 SV=1	20	7	15	7	520	56	8.53	18.2	107.8	106	107	93.1	90.7	95.4	1.149	0.000673889	67041
E9Q3L2	Pi4ka	Phosphatidylinositol 4-kinase alpha OS=Mus musculus OX=10090 GN=Pi4ka PE=1 SV=2	7	13	14	13	2105	236.9	7.06	11.28	94.5	97.9	99.5	106.3	99.5	102.3	0.94742	0.093442	224020
P17892	Pnliprp2	Pancreatic lipase-related protein 2 OS=Mus musculus OX=10090 GN=Pnliprp2 PE=1 SV=2	14	6	13	4	482	54	6.64	17.88	60	57.7	63.1	147	132.5	139.7	0.431298	5.87515e-05	18947
Q9DC23	Dnajc10	DnaJ homolog subfamily C member 10 OS=Mus musculus OX=10090 GN=Dnajc10 PE=1 SV=2	16	11	14	11	793	90.5	6.96	15.81	106.6	105.3	106.8	91.6	95.8	93.9	1.13295	0.000665012	66861
Q9Z329	Itpr2	Inositol 1,4,5-trisphosphate receptor type 2 OS=Mus musculus OX=10090 GN=Itpr2 PE=1 SV=4	4	12	13	7	2701	307.3	6.44	23.11	107.5	107.8	104.2	95.7	95.4	89.4	1.13904	0.00524787	16439
Q9Z0S1	Bpnt1	3'(2'),5'-bisphosphate nucleotidase 1 OS=Mus musculus OX=10090 GN=Bpnt1 PE=1 SV=2	30	7	10	7	308	33.2	5.82	25.21	91.5	94	91.2	107.5	104.8	111	0.855861	0.00148766	23827
Q9CRB9	Chchd3	MICOS complex subunit Mic19 OS=Mus musculus OX=10090 GN=Chchd3 PE=1 SV=1	36	9	12	9	227	26.3	8.37	25.27	101	98.3	100.1	100.3	95.5	104.9	0.995677	0.885614	66075
Q8BPM0	Daam1	Disheveled-associated activator of morphogenesis 1 OS=Mus musculus OX=10090 GN=Daam1 PE=1 SV=4	12	13	13	13	1077	123.3	7.46	20.64	83.5	95	86.2	115.8	106.5	113.1	0.789207	0.00603912	208846
Q9R0M4	Podxl	Podocalyxin OS=Mus musculus OX=10090 GN=Podxl PE=1 SV=2	12	5	10	5	503	53.4	4.97	15.9	78.9	81.5	82.6	119.5	121.9	115.5	0.680863	6.21038e-05	27205
Q8BMF4	Dlat	Dihydrolipoyllysine-residue acetyltransferase component of pyruvate dehydrogenase complex, mitochondrial OS=Mus musculus OX=10090 GN=Dlat PE=1 SV=2	16	9	12	8	642	67.9	8.57	29.48	95.6	99.6	95.6	101	105.4	102.8	0.940492	0.0293257	235339
G5E895	Akr1b10	Aldo-keto reductase family 1, member B10 (aldose reductase) OS=Mus musculus OX=10090 GN=Akr1b10 PE=1 SV=1	25	7	14	1	316	35.8	7.28	26.23	115.7	100.3	96.6	93	97.2	97.2	1.08768	0.234978	67861
Q810B6	Ankfy1	Rabankyrin-5 OS=Mus musculus OX=10090 GN=Ankfy1 PE=1 SV=2	12	12	13	12	1169	128.6	5.91	16.01	113.5	109.1	112.8	87.8	86	90.8	1.26757	0.000270252	11736
Q9DAR7	Dcps	m7GpppX diphosphatase OS=Mus musculus OX=10090 GN=Dcps PE=1 SV=1	27	8	14	8	338	39	6.48	16.57	104	113.9	112.2	88	93.4	88.4	1.2235	0.00462987	69305
Q8CGF7	Tcerg1	Transcription elongation regulator 1 OS=Mus musculus OX=10090 GN=Tcerg1 PE=1 SV=2	11	12	15	12	1100	123.7	8.65	19.2	104.8	104.4	104.7	95	91.7	99.5	1.09679	0.015113	56070
Q6NVF9	Cpsf6	Cleavage and polyadenylation specificity factor subunit 6 OS=Mus musculus OX=10090 GN=Cpsf6 PE=1 SV=1	20	9	15	9	551	59.1	7.15	16.86	103.2	106.7	104.4	90.5	94.8	100.4	1.10011	0.0351396	432508
Q8BJW6	Eif2a	Eukaryotic translation initiation factor 2A OS=Mus musculus OX=10090 GN=Eif2a PE=1 SV=2	18	9	11	9	581	64.4	8.91	21.65	106.1	107.5	108	89.4	96.2	92.7	1.15559	0.00212145	229317
P19536	Cox5b	Cytochrome c oxidase subunit 5B, mitochondrial OS=Mus musculus OX=10090 GN=Cox5b PE=1 SV=1	36	6	19	6	128	13.8	8.38	34.03	102.7	103.6	99.7	98	100.6	95.3	1.04117	0.10506	12859
Q07797	Lgals3bp	Galectin-3-binding protein OS=Mus musculus OX=10090 GN=Lgals3bp PE=1 SV=1	15	6	11	6	577	64.5	5.14	15.72	119.2	121.9	119.6	81.1	80.3	77.9	1.50731	5.92161e-06	19039
Q9D952	Evpl	Envoplakin OS=Mus musculus OX=10090 GN=Evpl PE=1 SV=3	7	15	16	15	2035	231.9	6.6	21.12	90.1	93.4	90.7	109.7	109.7	106.3	0.841879	0.000351477	14027
Q9QY76	Vapb	Vesicle-associated membrane protein-associated protein B OS=Mus musculus OX=10090 GN=Vapb PE=1 SV=3	27	7	14	6	243	26.9	7.78	26.68	103.8	101	102.7	99.3	96.7	96.6	1.05092	0.0144643	56491
Q569Z6	Thrap3	Thyroid hormone receptor-associated protein 3 OS=Mus musculus OX=10090 GN=Thrap3 PE=1 SV=1	15	12	13	12	951	108.1	10.17	15.43	91.9	94.5	89.7	105.7	111	107.3	0.85216	0.00159047	230753
Q8BYC6	Taok3	Serine/threonine-protein kinase TAO3 OS=Mus musculus OX=10090 GN=Taok3 PE=1 SV=2	11	10	12	10	898	105.3	7.36	24.52	106.2	108.3	106.7	95.9	92.3	90.6	1.15208	0.00110758	330177
Q8BJY1	Psmd5	26S proteasome non-ATPase regulatory subunit 5 OS=Mus musculus OX=10090 GN=Psmd5 PE=1 SV=4	18	7	9	7	504	55.9	5.21	22.4	100	103.2	102.3	99.6	94	100.8	1.0377	0.183257	66998
Q8QZR5	Gpt	Alanine aminotransferase 1 OS=Mus musculus OX=10090 GN=Gpt PE=1 SV=3	15	7	10	7	496	55.1	6.64	20.31	84.4	88.9	91.3	112.3	111.2	111.9	0.788909	0.000323692	76282
O35129	Phb2	Prohibitin-2 OS=Mus musculus OX=10090 GN=Phb2 PE=1 SV=1	29	8	12	8	299	33.3	9.83	32.12	101.6	101.8	101.2	99.1	96.2	100.1	1.03114	0.0605029	12034
Q9CZU3	Mtrex	Exosome RNA helicase MTR4 OS=Mus musculus OX=10090 GN=Mtrex PE=1 SV=1	11	11	14	11	1040	117.6	6.4	21.21	111.1	108	107.4	90.7	91.7	91	1.19422	0.000116693	72198
Q9CXW3	Cacybp	Calcyclin-binding protein OS=Mus musculus OX=10090 GN=Cacybp PE=1 SV=1	38	7	13	7	229	26.5	7.87	18.89	117.9	115.8	118.2	81.8	82	84.3	1.41838	6.12179e-06	12301
Q7TS64	Grk2	G protein-coupled receptor kinase OS=Mus musculus OX=10090 GN=Grk2 PE=1 SV=1	19	10	11	10	647	75.1	7.17	21.23	119.5	117.2	118.9	76.7	85.5	82.2	1.45499	0.000153237	110355
Q61584	Fxr1	Fragile X mental retardation syndrome-related protein 1 OS=Mus musculus OX=10090 GN=Fxr1 PE=1 SV=2	15	8	9	7	677	76.2	6.98	17.43	97.7	95.7	102.8	98.1	107.7	98.1	0.974663	0.539976	14359
Q6ZWN5	Rps9	40S ribosomal protein S9 OS=Mus musculus OX=10090 GN=Rps9 PE=1 SV=3	44	10	17	10	194	22.6	10.65	35.3	103	104.7	102.9	98.8	95.2	95.3	1.07363	0.00577225	76846
Q91YR1	Twf1	Twinfilin-1 OS=Mus musculus OX=10090 GN=Twf1 PE=1 SV=2	21	6	10	5	350	40.1	6.67	22.61	94.2	90.3	90.8	119	92.8	112.9	0.84786	0.108953	19230
A2AKI5	Itgav	Integrin alpha-V OS=Mus musculus OX=10090 GN=Itgav PE=1 SV=1	13	12	13	12	1008	111.4	5.67	22.72	104.6	104.8	103.4	94.7	94.6	97.9	1.08914	0.00187008	16410
P28653	Bgn	Biglycan OS=Mus musculus OX=10090 GN=Bgn PE=1 SV=1	29	10	14	9	369	41.6	7.27	20.2	105.5	97.6	105.2	99.3	95	97.4	1.05691	0.12597	12111
Q9CQE8	RTRAF	RNA transcription, translation and transport factor protein OS=Mus musculus OX=10090 GN=RTRAF PE=1 SV=1	37	8	14	8	244	28.1	6.89	20.79	103.9	100.2	103.5	103.5	93.7	95.2	1.05198	0.195689	68045
E9PXY8	Usp7	Ubiquitin carboxyl-terminal hydrolase 7 OS=Mus musculus OX=10090 GN=Usp7 PE=1 SV=1	9	10	12	10	1143	132.8	5.66	20.54	105.7	110.3	107.7	92.1	92	92.3	1.17113	0.000293839	252870
A2AT02	Nsfl1c	NSFL1 cofactor p47 OS=Mus musculus OX=10090 GN=Nsfl1c PE=1 SV=1	27	9	16	1	339	37.4	5.11	29.92	92.8	107.7	99.1	93.9	111.4	95.1	0.997337	0.971865	386649
Q9Z1R2	Bag6	Large proline-rich protein BAG6 OS=Mus musculus OX=10090 GN=Bag6 PE=1 SV=1	11	9	11	9	1154	121	5.71	19.83	95.6	113.5	98.5	103	97.2	92.2	1.05198	0.470551	224727
D3YYT1	Glyr1	Putative oxidoreductase GLYR1 OS=Mus musculus OX=10090 GN=Glyr1 PE=1 SV=1	17	7	10	7	552	60.4	9.13	21.66	103	98.6	104	104	90.1	100.4	1.03769	0.455573	74022
Q9CQI6	Cotl1	Coactosin-like protein OS=Mus musculus OX=10090 GN=Cotl1 PE=1 SV=3	51	7	15	7	142	15.9	5.4	35.33	125.2	123.4	126	74.3	76.3	74.8	1.66193	8.87e-07	72042
O88531	Ppt1	Palmitoyl-protein thioesterase 1 OS=Mus musculus OX=10090 GN=Ppt1 PE=1 SV=2	25	7	12	7	306	34.5	8	20.96	117.3	115.6	114	82.7	84.5	86	1.37006	2.05771e-05	19063
Q9CZ30	Ola1	Obg-like ATPase 1 OS=Mus musculus OX=10090 GN=Ola1 PE=1 SV=1	20	8	11	7	396	44.7	7.81	25.3	107.3	102.9	103.9	94.7	96	95.3	1.09825	0.00248439	67059
Q60676	Ppp5c	Serine/threonine-protein phosphatase 5 OS=Mus musculus OX=10090 GN=Ppp5c PE=1 SV=3	20	12	12	12	499	56.8	6.2	20.92	101.3	100.7	101.4	96.7	102.2	97.7	1.02293	0.254588	19060
Q9EQ06	Hsd17b11	Estradiol 17-beta-dehydrogenase 11 OS=Mus musculus OX=10090 GN=Hsd17b11 PE=1 SV=1	34	11	14	9	298	32.9	8.66	14.76	110.5	105.9	119.6	85.7	90.9	87.3	1.27321	0.00506566	114664
Q6Q477	Atp2b4	Plasma membrane calcium-transporting ATPase 4 OS=Mus musculus OX=10090 GN=Atp2b4 PE=1 SV=1	7	6	8	2	1205	133	6.13	16.04	70.6	71.8	75.1	123.9	130.2	128.4	0.568627	1.83421e-05	381290
P41241	Csk	Tyrosine-protein kinase CSK OS=Mus musculus OX=10090 GN=Csk PE=1 SV=2	16	6	10	6	450	50.7	7.06	19.76	105.8	104.9	108	99	86.3	96	1.13295	0.0340887	12988
Q80UM7	Mogs	Mannosyl-oligosaccharide glucosidase OS=Mus musculus OX=10090 GN=Mogs PE=1 SV=1	17	10	13	10	834	91.8	9	20.51	108.2	106.8	108.3	88.2	96.2	92.2	1.16884	0.0027351	57377
O70423	Aoc3	Membrane primary amine oxidase OS=Mus musculus OX=10090 GN=Aoc3 PE=1 SV=3	11	7	13	7	765	84.5	6.42	24.81	85	85.2	86.5	116.2	115.8	111.4	0.747525	5.63323e-05	11754
E9QJS7	Adgre5	Adhesion G protein-coupled receptor E5 OS=Mus musculus OX=10090 GN=Adgre5 PE=1 SV=1	11	8	13	8	818	90.4	7.3	29.68	90.7	90.2	88.7	114.8	106.4	109.3	0.815734	0.00131998	26364
Q6IFX2	Krt42	Keratin, type I cytoskeletal 42 OS=Mus musculus OX=10090 GN=Krt42 PE=1 SV=1	20	10	18	5	452	50.1	5.16	29.04	92.1	95.4	96.6	104.1	104.6	107.2	0.899335	0.00304067	68239
Q99L20	Gstt3	Glutathione S-transferase theta-3 OS=Mus musculus OX=10090 GN=Gstt3 PE=1 SV=1	28	6	11	6	241	27.4	7.74	22.3	89.9	90.5	90.4	109	105.5	114.7	0.8226	0.00192782	103140
Q6P5D8	Smchd1	Structural maintenance of chromosomes flexible hinge domain-containing protein 1 OS=Mus musculus OX=10090 GN=Smchd1 PE=1 SV=2	6	12	14	12	2007	225.5	7.24	12.93	103.3	107.3	107.2	93	95.4	93.8	1.12615	0.00136068	74355
Q8BRF7	Scfd1	Sec1 family domain-containing protein 1 OS=Mus musculus OX=10090 GN=Scfd1 PE=1 SV=1	17	9	11	9	639	72.3	6.38	18.08	100.4	111.4	103.5	95.3	93.8	95.6	1.10748	0.0372651	76983
P70122	Sbds	Ribosome maturation protein SBDS OS=Mus musculus OX=10090 GN=Sbds PE=1 SV=4	35	10	12	10	250	28.8	8.76	19.46	98.9	96.5	94.1	102.4	105.1	103	0.932367	0.012161	66711
P54923	Adprh	[Protein ADP-ribosylarginine] hydrolase OS=Mus musculus OX=10090 GN=Adprh PE=1 SV=1	15	5	9	5	362	40	5.76	21.64	114.1	118.4	116	79.6	88.2	83.6	1.38624	0.00031051	11544
P10833	Rras	Ras-related protein R-Ras OS=Mus musculus OX=10090 GN=Rras PE=1 SV=1	42	9	14	7	218	23.7	6.79	23.19	89.8	88.3	85.3	113.6	110.1	112.9	0.782531	0.00013723	20130
Q99J08	Sec14l2	SEC14-like protein 2 OS=Mus musculus OX=10090 GN=Sec14l2 PE=1 SV=1	13	5	13	3	403	46.3	7.11	26.46	94	99.1	92.3	105.6	110	98.9	0.907472	0.06401	67815
Q3UND0	Skap2	Src kinase-associated phosphoprotein 2 OS=Mus musculus OX=10090 GN=Skap2 PE=1 SV=2	23	9	11	9	358	40.7	4.7	23.98	133	126.9	127.6	72.1	67.7	72.7	1.82353	1.96723e-05	54353
P51125	Cast	Calpastatin OS=Mus musculus OX=10090 GN=Cast PE=1 SV=2	20	11	15	11	788	84.9	5.52	22.36	96.4	93.6	97.7	99.7	109.5	103	0.921525	0.0590915	12380
Q99KY4	Gak	Cyclin-G-associated kinase OS=Mus musculus OX=10090 GN=Gak PE=1 SV=2	10	12	12	12	1305	143.6	5.73	10.77	113.2	114.1	109.8	89.5	86.2	87.3	1.28175	0.000110453	231580
A2AQ43	Fnbp1	Formin-binding protein 1 OS=Mus musculus OX=10090 GN=Fnbp1 PE=1 SV=1	12	8	12	8	554	64.6	5.24	25.56	115.7	114.3	112.7	88.4	83.8	85.1	1.33191	6.16487e-05	14269
A0A0R4IZY6	Prtn3	Myeloblastin OS=Mus musculus OX=10090 GN=Prtn3 PE=1 SV=1	29	5	14	5	254	27.6	7.2	23.27	128.4	128.5	130.9	66.7	71	74.5	1.82752	1.67442e-05	19152
Q3TBA3	Tap1	Antigen peptide transporter 1 OS=Mus musculus OX=10090 GN=Tap1 PE=1 SV=1	14	9	13	9	696	75.9	8.7	20.01	130.5	133.8	131.1	66	70.2	68.4	1.93255	2.30078e-06	21354
P62889	Rpl30	60S ribosomal protein L30 OS=Mus musculus OX=10090 GN=Rpl30 PE=1 SV=2	61	7	12	7	115	12.8	9.63	23.38	105.4	109.4	103.6	87.5	103.4	90.6	1.13108	0.0756577	19946
D3YXZ3	Klc2	Kinesin light chain 2 OS=Mus musculus OX=10090 GN=Klc2 PE=1 SV=1	17	9	10	5	617	68.1	7.06	16.95	105.3	109.9	108.1	86.7	97.8	92.3	1.16799	0.01113	16594
P43137	Reg1	Lithostathine-1 OS=Mus musculus OX=10090 GN=Reg1 PE=1 SV=1	48	6	8	6	165	18.5	6.51	19.51	31.2	33.2	32.1	170.7	170.2	162.6	0.191658	9.16346e-07	19692
P70303	Ctps2	CTP synthase 2 OS=Mus musculus OX=10090 GN=Ctps2 PE=1 SV=1	18	10	12	9	586	65.5	6.49	17.74	107.2	110.1	107.9	86.7	94.8	93.2	1.18384	0.00304441	55936
Q62074	Prkci	Protein kinase C iota type OS=Mus musculus OX=10090 GN=Prkci PE=1 SV=3	16	6	9	6	595	68.2	5.85	17.48	88.5	82.7	95.7	110.7	113.7	108.7	0.801261	0.00541907	18759
Q61703	Itih2	Inter-alpha-trypsin inhibitor heavy chain H2 OS=Mus musculus OX=10090 GN=Itih2 PE=1 SV=1	8	9	12	9	946	105.9	7.27	23.05	91.8	91.7	90.1	109.5	108	108.9	0.838235	1.50586e-05	16425
Q9CQM9	Glrx3	Glutaredoxin-3 OS=Mus musculus OX=10090 GN=Glrx3 PE=1 SV=1	26	7	10	7	337	37.8	5.59	18.9	111.6	109.4	109.9	87.3	87.6	94.3	1.2292	0.000986278	30926
Q9JK53	Prelp	Prolargin OS=Mus musculus OX=10090 GN=Prelp PE=1 SV=2	27	10	14	10	378	43.3	9.54	11.88	96.3	97.3	95	106.2	100.2	105.1	0.926485	0.017644	116847
Q9Z1P7	Kank3	KN motif and ankyrin repeat domain-containing protein 3 OS=Mus musculus OX=10090 GN=Kank3 PE=1 SV=1	14	10	12	10	791	84.1	5.2	25.11	83.4	87	91.5	116.2	108	113.9	0.774623	0.00168637	80880
P40336	Vps26a	Vacuolar protein sorting-associated protein 26A OS=Mus musculus OX=10090 GN=Vps26a PE=1 SV=1	25	7	10	6	327	38.1	6.57	20.06	100.8	102.5	99.2	101.4	100.5	95.6	1.01681	0.459495	30930
J3QNU6	Arrb1	Beta-arrestin-1 OS=Mus musculus OX=10090 GN=Arrb1 PE=1 SV=1	21	6	8	6	419	47.1	6.55	18.76	92.3	88.4	87.5	109.3	108.9	113.6	0.808318	0.000547313	109689
Q61781	Krt14	Keratin, type I cytoskeletal 14 OS=Mus musculus OX=10090 GN=Krt14 PE=1 SV=2	21	11	12	4	484	52.8	5.17	21.74	101.2	104.2	107.7	99.5	93.6	93.8	1.09132	0.0316961	16664
Q5RKZ7	Mocs1	Molybdenum cofactor biosynthesis protein 1 OS=Mus musculus OX=10090 GN=Mocs1 PE=1 SV=2	9	5	7	5	636	69.8	9.14	18.53	94.3	100.9	101.6	98	102.4	102.8	0.978892	0.486796	56738
Q8R1G6	Pdlim2	PDZ and LIM domain protein 2 OS=Mus musculus OX=10090 GN=Pdlim2 PE=1 SV=1	24	7	12	7	349	37.7	8.7	28.91	89.5	87.8	91	107.1	111.6	113.1	0.80862	0.000474221	213019
F8WI90	Src	Tyrosine-protein kinase OS=Mus musculus OX=10090 GN=Src PE=1 SV=1	15	7	10	5	535	59.9	7.42	22.42	99.2	95.5	98.3	101.2	101.9	103.9	0.954397	0.0275421	20779
Q91UZ1	Plcb4	Phosphoinositide phospholipase C OS=Mus musculus OX=10090 GN=Plcb4 PE=1 SV=1	10	10	11	10	1175	134.4	6.9	15.24	85	87.1	87.5	107.4	113.6	119.4	0.762632	0.00161959	18798
Q9DCM2	Gstk1	Glutathione S-transferase kappa 1 OS=Mus musculus OX=10090 GN=Gstk1 PE=1 SV=3	44	10	12	10	226	25.7	8.88	14.01	87.4	81.5	87.1	122.9	100	121	0.744402	0.0180941	76263
Q9R190	Mta2	Metastasis-associated protein MTA2 OS=Mus musculus OX=10090 GN=Mta2 PE=1 SV=1	17	11	15	8	668	75	9.67	20.7	109.6	107.1	109.4	89.9	91.4	92.5	1.19102	9.27998e-05	23942
P55772	Entpd1	Ectonucleoside triphosphate diphosphohydrolase 1 OS=Mus musculus OX=10090 GN=Entpd1 PE=1 SV=1	17	9	14	9	510	57.2	5.86	25.13	95.7	92.8	92.1	102.4	113.3	103.8	0.878247	0.0226582	12495
P62267	Rps23	40S ribosomal protein S23 OS=Mus musculus OX=10090 GN=Rps23 PE=1 SV=3	29	5	13	5	143	15.8	10.49	25.49	105.7	104.8	102	91.7	98.7	97	1.08733	0.0246897	66475
Q8CH18	Ccar1	Cell division cycle and apoptosis regulator protein 1 OS=Mus musculus OX=10090 GN=Ccar1 PE=1 SV=1	12	13	13	13	1146	132	5.76	19.53	104	103.4	104	96.8	95	96.9	1.07863	0.000309261	67500
Q8BPB5	Efemp1	EGF-containing fibulin-like extracellular matrix protein 1 OS=Mus musculus OX=10090 GN=Efemp1 PE=1 SV=1	27	9	11	9	493	54.9	5.14	20.86	83.9	87.6	88	111.9	116.9	111.7	0.762115	0.000228846	216616
Q9CR16	Ppid	Peptidyl-prolyl cis-trans isomerase D OS=Mus musculus OX=10090 GN=Ppid PE=1 SV=3	17	7	13	7	370	40.7	7.43	27.02	112.3	108	111.3	93	88.6	86.9	1.23501	0.000709472	67738
Q3TTY5	Krt2	Keratin, type II cytoskeletal 2 epidermal OS=Mus musculus OX=10090 GN=Krt2 PE=1 SV=1	8	9	16	4	707	70.9	8.06	27.96	95.4	95.6	97.2	100	111.9	99.9	0.92431	0.12226	16681
P62071	Rras2	Ras-related protein R-Ras2 OS=Mus musculus OX=10090 GN=Rras2 PE=1 SV=1	44	8	16	6	204	23.4	6.01	27.63	83.1	85	88.7	115	110.4	117.7	0.74847	0.000434183	66922
B7ZNL2	Nap1l4	Nap1l4 protein OS=Mus musculus OX=10090 GN=Nap1l4 PE=1 SV=1	18	8	11	7	386	43.9	4.68	25.53	97.7	102.2	101.3	100.8	96.8	101.1	1.00837	0.691449	17955
A0A0G2JE99	Iglc1	Immunoglobulin lambda constant 1 (Fragment) OS=Mus musculus OX=10090 GN=Iglc1 PE=4 SV=1	45	3	16	3	106	11.7	6.27	34.37	120.5	119	121.6	79.3	82.7	76.8	1.51214	2.61096e-05	-
Q3TCH7	Cul4a	Cullin-4A OS=Mus musculus OX=10090 GN=Cul4a PE=1 SV=1	15	13	13	7	759	87.7	8.35	21.26	101.2	104.3	103.1	95	100.8	95.7	1.05866	0.0490036	99375
P22437	Ptgs1	Prostaglandin G/H synthase 1 OS=Mus musculus OX=10090 GN=Ptgs1 PE=1 SV=1	19	10	11	10	602	69	6.83	21.24	117.1	112.7	112.8	87.7	85.5	84.2	1.331	8.89954e-05	19224
Q99JB2	Stoml2	Stomatin-like protein 2, mitochondrial OS=Mus musculus OX=10090 GN=Stoml2 PE=1 SV=1	15	4	7	4	353	38.4	8.87	15.44	94.5	92.1	93.9	103.9	107.5	108.1	0.877934	0.000967032	66592
O88456	Capns1	Calpain small subunit 1 OS=Mus musculus OX=10090 GN=Capns1 PE=1 SV=1	15	4	9	4	269	28.4	5.63	26.86	95.9	93.6	94.3	107.3	104.1	104.9	0.897249	0.00077671	12336
A0A1B0GS68	Gm45713	Uncharacterized protein OS=Mus musculus OX=10090 GN=Gm45713 PE=2 SV=1	13	6	25	3	446	50.8	10.23	54.29	100	95.1	97.3	90.8	94.1	122.6	0.950894	0.647363	-
Q9JLQ0	Cd2ap	CD2-associated protein OS=Mus musculus OX=10090 GN=Cd2ap PE=1 SV=3	20	11	14	11	637	70.4	6.38	14.22	94	91.7	91.4	111	103.2	108.8	0.857895	0.00341662	12488
Q8K1J6	Trnt1	CCA tRNA nucleotidyltransferase 1, mitochondrial OS=Mus musculus OX=10090 GN=Trnt1 PE=1 SV=1	23	9	11	9	434	49.9	8.56	19.86	108.6	108	112.2	87.2	89.3	94.7	1.21239	0.00176785	70047
P62331	Arf6	ADP-ribosylation factor 6 OS=Mus musculus OX=10090 GN=Arf6 PE=1 SV=2	32	5	8	5	175	20.1	8.95	19.21	102	99.1	98.1	107.8	87.1	105.8	0.995012	0.944053	11845
A2AWT7	Ubtf	Nucleolar transcription factor 1 OS=Mus musculus OX=10090 GN=Ubtf PE=1 SV=1	17	11	14	11	752	88.3	9.89	19.74	106	119.9	116.3	86.4	81.6	89.7	1.3279	0.00415758	21429
A2AP78	Hmgb3	High mobility group protein B3 (Fragment) OS=Mus musculus OX=10090 GN=Hmgb3 PE=1 SV=1	30	5	9	4	159	18.3	9.77	16.96	115.2	111	116.9	88	80.9	88	1.33554	0.000618549	15354
A0A2I3BRT4	Eppk1	Epiplakin OS=Mus musculus OX=10090 GN=Eppk1 PE=1 SV=1	6	12	14	10	3458	381.5	5.92	17.62	94.1	99.7	97.4	103.7	102.9	102.1	0.943311	0.0259908	-
D3Z3Q3	Smtn	Smoothelin OS=Mus musculus OX=10090 GN=Smtn PE=1 SV=1	11	8	8	8	946	103	8.63	13.25	89.6	91.5	100	104.2	105.4	109.3	0.881468	0.023786	29856
Q99KE1	Me2	NAD-dependent malic enzyme, mitochondrial OS=Mus musculus OX=10090 GN=Me2 PE=1 SV=1	19	9	13	8	589	65.8	7.61	13.5	118.3	114.6	111.3	88.7	79.6	87.6	1.34506	0.0011049	107029
Q3U9G9	Lbr	Lamin-B receptor OS=Mus musculus OX=10090 GN=Lbr PE=1 SV=2	12	10	13	10	626	71.4	9.36	22.38	111.3	115.1	109.2	87.1	89.4	88	1.26881	0.00021478	98386
Q9JL62	Gltp	Glycolipid transfer protein OS=Mus musculus OX=10090 GN=Gltp PE=1 SV=3	32	7	14	7	209	23.7	7.39	21.99	105.7	105	103.1	93.5	99.1	93.5	1.09682	0.0102855	56356
P63280	Ube2i	SUMO-conjugating enzyme UBC9 OS=Mus musculus OX=10090 GN=Ube2i PE=1 SV=1	23	5	9	5	158	18	8.66	27.95	118.2	111.6	116.5	83.2	87	83.4	1.36554	0.000187509	22196
P70441	Slc9a3r1	Na(+)/H(+) exchange regulatory cofactor NHE-RF1 OS=Mus musculus OX=10090 GN=Slc9a3r1 PE=1 SV=3	29	10	13	10	355	38.6	5.9	17.04	107.3	112.8	107.3	89.2	91.3	92.2	1.20059	0.000862387	26941
D3Z598	Ltbp4	Latent-transforming growth factor beta-binding protein 4 OS=Mus musculus OX=10090 GN=Ltbp4 PE=1 SV=1	9	10	12	10	1558	166.7	5.11	17.06	90	97.8	90.3	105.4	108.1	108.3	0.864201	0.00584456	108075
A0A1B0GR60	Ftl1	Ferritin OS=Mus musculus OX=10090 GN=Ftl1 PE=1 SV=1	26	3	8	3	160	18	6.28	18.8	117.2	115.8	117.7	82.5	88.1	78.7	1.40674	0.000265837	14325
O89110	Casp8	Caspase-8 OS=Mus musculus OX=10090 GN=Casp8 PE=1 SV=1	18	8	10	8	480	55.3	5.25	19.21	120	124.1	118.6	80.1	79.4	77.9	1.5278	1.92628e-05	12370
Q9QYR9	Acot2	Acyl-coenzyme A thioesterase 2, mitochondrial OS=Mus musculus OX=10090 GN=Acot2 PE=1 SV=2	20	10	15	2	453	49.6	7.36	20.89	103.1	110.4	107.1	91.5	97.7	90.2	1.14746	0.011829	171210
O70475	Ugdh	UDP-glucose 6-dehydrogenase OS=Mus musculus OX=10090 GN=Ugdh PE=1 SV=1	22	9	10	9	493	54.8	7.56	18.27	103.1	105.5	105.6	94.4	96.3	95.2	1.09899	0.000665388	22235
Q5SUR0	Pfas	Phosphoribosylformylglycinamidine synthase OS=Mus musculus OX=10090 GN=Pfas PE=1 SV=1	9	9	11	9	1337	144.5	5.67	12.98	100.4	107.2	108.2	95.3	94.7	94.3	1.1108	0.0131036	237823
E9Q1W0	Camk2d	Calcium/calmodulin-dependent protein kinase type II subunit delta OS=Mus musculus OX=10090 GN=Camk2d PE=1 SV=2	18	9	15	6	512	57.7	7.15	33.02	105.6	103.3	104.9	98.9	90.7	96.6	1.09644	0.0221782	108058
P70290	Mpp1	55 kDa erythrocyte membrane protein OS=Mus musculus OX=10090 GN=Mpp1 PE=1 SV=1	20	7	15	7	466	52.2	7.2	18.12	90.6	93.6	92.1	108.1	106.4	109.3	0.853305	0.000195251	17524
P50404	Sftpd	Pulmonary surfactant-associated protein D OS=Mus musculus OX=10090 GN=Sftpd PE=1 SV=1	21	6	9	6	374	37.7	7.65	17.66	102	100.2	104.3	95.2	100.8	97.4	1.04465	0.0961492	20390
O70194	Eif3d	Eukaryotic translation initiation factor 3 subunit D OS=Mus musculus OX=10090 GN=Eif3d PE=1 SV=2	13	7	11	7	548	63.9	6.05	26.07	106.2	111.3	104.2	92.5	93.3	92.5	1.15595	0.00245615	55944
Q9JI11	Stk4	Serine/threonine-protein kinase 4 OS=Mus musculus OX=10090 GN=Stk4 PE=1 SV=1	22	10	14	6	487	55.5	5.19	15.2	106.9	103	106.6	91.3	101.1	91.2	1.11601	0.0355101	58231
A0A1Y7VNF4	Ero1lb	ERO1-like beta (S. cerevisiae) OS=Mus musculus OX=10090 GN=Ero1lb PE=1 SV=1	16	7	8	7	493	55.9	7.8	21.18	93.3	89.7	90.9	108.3	108.9	109	0.839669	8.63587e-05	-
P15105	Glul	Glutamine synthetase OS=Mus musculus OX=10090 GN=Glul PE=1 SV=6	26	10	11	10	373	42.1	7.08	20.87	96.6	96.9	96.8	101.1	106	102.5	0.937661	0.0116286	14645
Q9CY64	Blvra	Biliverdin reductase A OS=Mus musculus OX=10090 GN=Blvra PE=1 SV=1	24	7	10	7	295	33.5	7.02	26.04	120.8	116.2	121.2	81.9	77.6	82.3	1.48139	6.06278e-05	109778
Q62433	Ndrg1	Protein NDRG1 OS=Mus musculus OX=10090 GN=Ndrg1 PE=1 SV=1	23	6	8	6	394	43	6.1	14.09	100.9	102.5	101.7	99	98.8	97	1.03494	0.0119852	17988
P62849	Rps24	40S ribosomal protein S24 OS=Mus musculus OX=10090 GN=Rps24 PE=1 SV=1	26	4	11	4	133	15.4	10.78	11.64	96.4	98.3	100.6	102.9	99	102.7	0.969468	0.152192	20088
Q91Z40	Gbp7	Gbp6 protein OS=Mus musculus OX=10090 GN=Gbp7 PE=1 SV=2	16	10	11	8	638	72.7	6.33	16.74	112.2	114.7	109.5	87.3	89.9	86.5	1.27569	0.000183416	229900
P26350	Ptma	Prothymosin alpha OS=Mus musculus OX=10090 GN=Ptma PE=1 SV=2	14	2	12	2	111	12.2	3.79	29.38	113.8	113.5	112.4	85.4	85.1	89.8	1.30503	7.39856e-05	19231
Q63ZW7	Patj	InaD-like protein OS=Mus musculus OX=10090 GN=Patj PE=1 SV=2	7	9	10	9	1834	198.4	4.97	17.64	82.4	83.5	84.7	113.6	124.4	111.3	0.717435	0.00129962	12695
P55096	Abcd3	ATP-binding cassette sub-family D member 3 OS=Mus musculus OX=10090 GN=Abcd3 PE=1 SV=2	14	11	15	11	659	75.4	9.26	20.97	109.9	109.2	113.4	89.1	89.6	88.7	1.24346	8.13624e-05	19299
A0A1D5RLW5	Rpl18a	60S ribosomal protein L18a OS=Mus musculus OX=10090 GN=Rpl18a PE=1 SV=1	31	4	12	4	147	17.4	10.89	25.64	102.4	103.1	103.8	97	96	97.6	1.06435	0.000541371	76808
Q80WQ2	Vac14	Protein VAC14 homolog OS=Mus musculus OX=10090 GN=Vac14 PE=1 SV=1	14	10	12	10	782	88	6.13	17.86	98.9	96.8	102	93.4	107.9	101	0.984783	0.747851	234729
Q99104	Myo5a	Unconventional myosin-Va OS=Mus musculus OX=10090 GN=Myo5a PE=1 SV=2	5	10	10	6	1853	215.4	8.63	22.92	116	124	118.7	79.4	82.4	79.5	1.48653	0.000104745	17918
Q8JZZ5	Pitpnb	Phosphatidylinositol transfer protein beta isoform OS=Mus musculus OX=10090 GN=Pitpnb PE=1 SV=1	29	8	11	6	272	31.6	6.37	20.76	94.9	100.5	101	103.7	101	98.9	0.976285	0.373652	56305
Q9CWS0	Ddah1	N(G),N(G)-dimethylarginine dimethylaminohydrolase 1 OS=Mus musculus OX=10090 GN=Ddah1 PE=1 SV=3	37	9	14	8	285	31.4	5.97	19.41	86.8	86.4	82.4	109.5	124.3	110.6	0.74216	0.00397032	69219
Q9DC51	Gnai3	Guanine nucleotide-binding protein G(k) subunit alpha OS=Mus musculus OX=10090 GN=Gnai3 PE=1 SV=3	26	9	15	2	354	40.5	5.69	31.28	91.5	94.1	82.3	95.6	137	99.5	0.806685	0.192656	14679
G5E8E1	Lrrfip1	Leucine rich repeat (In FLII) interacting protein 1, isoform CRA_e OS=Mus musculus OX=10090 GN=Lrrfip1 PE=1 SV=1	25	9	10	3	428	48.9	5.57	19.89	90	88.8	86.8	106.4	115.5	112.5	0.794258	0.0012696	16978
P11352	Gpx1	Glutathione peroxidase 1 OS=Mus musculus OX=10090 GN=Gpx1 PE=1 SV=2	24	5	14	5	201	22.3	7.21	27.11	106.4	100.7	100.7	100.9	96.6	94.7	1.05339	0.120284	14775
O09061	Psmb1	Proteasome subunit beta type-1 OS=Mus musculus OX=10090 GN=Psmb1 PE=1 SV=1	35	6	12	6	240	26.4	7.81	21.41	108.4	108.7	103.4	84.2	110.7	84.6	1.14669	0.200834	19170
P14131	Rps16	40S ribosomal protein S16 OS=Mus musculus OX=10090 GN=Rps16 PE=1 SV=4	47	8	18	8	146	16.4	10.21	35.7	101.3	104.6	103.4	95.3	99.2	96.2	1.06398	0.0152167	20055
E9PXI0	Vav1	Proto-oncogene vav OS=Mus musculus OX=10090 GN=Vav1 PE=1 SV=1	11	11	11	10	821	95.5	6.58	17.54	128	129.4	129.7	71.8	70.4	70.8	1.81737	1.0597e-07	22324
Q9Z1Z2	Strap	Serine-threonine kinase receptor-associated protein OS=Mus musculus OX=10090 GN=Strap PE=1 SV=2	30	8	9	8	350	38.4	5.12	21.02	110.1	108.9	104.6	90.3	95	91.2	1.17034	0.00205667	20901
Q3TZY4	Tmcc2	Transmembrane and coiled-coil domains protein 2 OS=Mus musculus OX=10090 GN=Tmcc2 PE=1 SV=1	13	7	10	7	628	69.1	7.24	20.41	84.5	93.5	94.1	111.7	103.7	112.5	0.829826	0.0113163	68875
O89103	Cd93	Complement component C1q receptor OS=Mus musculus OX=10090 GN=Cd93 PE=1 SV=1	13	7	8	7	644	69.3	5.07	16.12	79.8	80.8	82.6	121.3	113.8	121.6	0.681805	0.000146099	17064
Q6P5B5	Fxr2	Fragile X mental retardation syndrome-related protein 2 OS=Mus musculus OX=10090 GN=Fxr2 PE=1 SV=1	13	7	7	5	674	74.2	6.23	15.87	93	94.9	93.7	102.2	111.7	104.4	0.8847	0.0138797	23879
Q9CX34	Sugt1	Protein SGT1 homolog OS=Mus musculus OX=10090 GN=Sugt1 PE=1 SV=3	30	8	10	8	336	38.1	5.45	23.58	107.5	103.6	106.4	93.3	97.8	91.5	1.1235	0.0061777	67955
Q91VA7	Idh3b	Isocitrate dehydrogenase [NAD] subunit, mitochondrial OS=Mus musculus OX=10090 GN=Idh3b PE=1 SV=1	20	7	12	7	384	42.2	8.6	19.33	98.8	98.5	95.6	101.9	101.9	103.4	0.953451	0.0137509	170718
A0A1W2P6P1	Sgta	Small glutamine-rich tetratricopeptide repeat-containing protein alpha (Fragment) OS=Mus musculus OX=10090 GN=Sgta PE=1 SV=1	39	8	9	8	211	23.2	5.05	18.42	107.9	106.5	104.2	93.7	96.3	91.4	1.1322	0.00222985	52551
Q00915	Rbp1	Retinol-binding protein 1 OS=Mus musculus OX=10090 GN=Rbp1 PE=1 SV=2	50	7	9	7	135	15.8	5.25	8.25	104.6	94.3	106.2	104.5	87.7	102.8	1.03424	0.632451	19659
E9PUK6	Srrm1	Serine/arginine repetitive matrix protein 1 OS=Mus musculus OX=10090 GN=Srrm1 PE=1 SV=1	5	5	7	5	923	104.2	11.85	20.71	111.6	107.2	109.8	91.8	88.2	91.3	1.21121	0.000359598	51796
P97290	Serping1	Plasma protease C1 inhibitor OS=Mus musculus OX=10090 GN=Serping1 PE=1 SV=3	18	8	11	8	504	55.5	6.29	16.22	91.2	92.9	91.9	108.4	104.3	111.4	0.851589	0.0016269	12258
Q9D1D4	Tmed10	Transmembrane emp24 domain-containing protein 10 OS=Mus musculus OX=10090 GN=Tmed10 PE=1 SV=1	30	6	12	6	219	24.9	6.7	25.83	114.1	106	106.8	90.6	90.2	92.3	1.197	0.00250945	68581
O35598	Adam10	Disintegrin and metalloproteinase domain-containing protein 10 OS=Mus musculus OX=10090 GN=Adam10 PE=1 SV=2	14	7	11	7	749	83.9	7.94	15.62	101.8	102.9	107.4	96.5	94.1	97.4	1.08368	0.0152791	11487
Q8BMJ3	Eif1ax	Eukaryotic translation initiation factor 1A, X-chromosomal OS=Mus musculus OX=10090 GN=Eif1ax PE=2 SV=3	38	7	12	1	144	16.5	5.24	22.79	99	98.2	100.3	100.7	95.4	106.4	0.983471	0.633531	66235
Q8VCR7	Abhd14b	Protein ABHD14B OS=Mus musculus OX=10090 GN=Abhd14b PE=1 SV=1	36	6	12	4	210	22.4	6.27	25.81	90.9	94.2	88	103.7	114.4	108.7	0.835679	0.00743451	76491
Q3THS6	Mat2a	S-adenosylmethionine synthase isoform type-2 OS=Mus musculus OX=10090 GN=Mat2a PE=1 SV=2	28	10	12	7	395	43.7	6.48	22.64	97.7	97.5	96.8	102.5	101.8	103.7	0.948052	0.000992775	232087
Q9JHW2	Nit2	Omega-amidase NIT2 OS=Mus musculus OX=10090 GN=Nit2 PE=1 SV=1	32	7	11	7	276	30.5	6.9	20.13	96.9	91	100.2	104.3	103.4	104.3	0.923397	0.0422908	52633
Q9R0P3	Esd	S-formylglutathione hydrolase OS=Mus musculus OX=10090 GN=Esd PE=1 SV=1	32	7	18	7	282	31.3	7.12	29.93	114.3	101.8	105.2	98.5	87.6	92.5	1.15327	0.0435031	13885
D3Z030	Carmil1	F-actin-uncapping protein LRRC16A OS=Mus musculus OX=10090 GN=Carmil1 PE=1 SV=2	10	12	15	12	1332	147.1	7.87	14.49	83.3	84.8	84.9	120.5	120	106.5	0.729107	0.00245682	68732
Q9D051	Pdhb	Pyruvate dehydrogenase E1 component subunit beta, mitochondrial OS=Mus musculus OX=10090 GN=Pdhb PE=1 SV=1	27	8	12	8	359	38.9	6.87	12.4	97.2	94.4	98.4	99.6	103.6	106.8	0.935484	0.049713	68263
B2RV77	Gm5483	MCG130182, isoform CRA_a OS=Mus musculus OX=10090 GN=Gm5483 PE=1 SV=1	57	5	11	5	97	11	8.1	22.89	126.9	119.2	125.2	72.8	75.8	80.1	1.62352	0.000112847	-
P35278	Rab5c	Ras-related protein Rab-5C OS=Mus musculus OX=10090 GN=Rab5c PE=1 SV=2	38	6	11	5	216	23.4	8.41	16.73	97.7	103.6	108.3	100.9	89.8	99.8	1.06575	0.245037	19345
A0A1L1SSF2	Adpgk	ADP-dependent glucokinase OS=Mus musculus OX=10090 GN=Adpgk PE=1 SV=1	16	6	9	6	496	53.9	5.62	14.54	106.3	108.9	113.6	89.1	90.9	91.2	1.21239	0.00100808	72141
D3YXK2	Safb	Scaffold attachment factor B1 OS=Mus musculus OX=10090 GN=Safb PE=1 SV=2	14	11	12	7	937	105	5.35	17.54	102.1	100.1	98.8	99.5	99.8	99.7	1.00669	0.52717	224903
Q80UJ7	Rab3gap1	Rab3 GTPase-activating protein catalytic subunit OS=Mus musculus OX=10090 GN=Rab3gap1 PE=1 SV=4	12	9	12	9	981	110.1	5.73	11.75	107.8	107.3	105.6	93.3	95.2	90.8	1.14823	0.000658251	226407
Q9Z1G4	Atp6v0a1	V-type proton ATPase 116 kDa subunit a isoform 1 OS=Mus musculus OX=10090 GN=Atp6v0a1 PE=1 SV=3	15	10	11	9	839	96.4	6.76	15.56	109.8	107.2	106.8	94.4	88.5	93.4	1.17191	0.00151659	11975
P45878	Fkbp2	Peptidyl-prolyl cis-trans isomerase FKBP2 OS=Mus musculus OX=10090 GN=Fkbp2 PE=1 SV=1	29	5	12	5	140	15.3	8.88	23.99	127.3	125.9	121.6	71.9	80.5	72.8	1.6643	0.00010187	114841036
Q64282	Ifit1	Interferon-induced protein with tetratricopeptide repeats 1 OS=Mus musculus OX=10090 GN=Ifit1 PE=1 SV=2	22	10	11	8	463	53.7	7.52	17.47	130.2	126.6	130.5	69	76.8	66.9	1.82087	5.79832e-05	15957
Q99ME9	Gtpbp4	Nucleolar GTP-binding protein 1 OS=Mus musculus OX=10090 GN=Gtpbp4 PE=1 SV=3	16	9	12	9	634	74.1	9.52	14.32	107.1	110.9	110.2	89	90.9	91.9	1.20751	0.000201151	69237
Q9CQ62	Decr1	2,4-dienoyl-CoA reductase, mitochondrial OS=Mus musculus OX=10090 GN=Decr1 PE=1 SV=1	19	5	11	5	335	36.2	8.95	22.24	93.4	93.1	92.4	107.4	107.4	106.2	0.868847	9.41886e-06	67460
A0A0R4J034	Pdxdc1	MCG129810, isoform CRA_c OS=Mus musculus OX=10090 GN=Pdxdc1 PE=1 SV=1	11	7	8	7	789	87.4	5.67	18.18	110.1	114.8	116.2	86.6	85.5	86.7	1.31801	0.000129487	94184
Q80T06	Eef1d	Elongation factor 1-delta OS=Mus musculus OX=10090 GN=Eef1d PE=1 SV=1	31	7	11	1	281	31.3	5.06	20.88							#DIV/0!	#DIV/0!	66656
F6ZFU0	Eef1d	Elongation factor 1-delta (Fragment) OS=Mus musculus OX=10090 GN=Eef1d PE=1 SV=1	15	7	11	1	552	61.4	7.39	20.88	107.5	107	104.1	90.7	101.9	88.8	1.1322	0.042521	66656
Q80VQ0	Aldh3b1	Aldehyde dehydrogenase family 3 member B1 OS=Mus musculus OX=10090 GN=Aldh3b1 PE=1 SV=1	18	8	9	8	468	52.3	7.55	14.13	98	109.9	97.4	98.3	96.3	100	1.03632	0.444449	67689
Q9Z0R6	Itsn2	Intersectin-2 OS=Mus musculus OX=10090 GN=Itsn2 PE=1 SV=2	7	10	11	10	1659	188.8	8.13	15.19	103	104.2	106	96.6	94.5	95.7	1.09205	0.00116217	20403
Q9CR61	Ndufb7	NADH dehydrogenase [ubiquinone] 1 beta subcomplex subunit 7 OS=Mus musculus OX=10090 GN=Ndufb7 PE=1 SV=3	61	6	8	6	137	16.3	8.18	17.97	105.7	103.3	88.6	101.4	97.6	103.5	0.983802	0.785672	66916
P0C605	Prkg1	cGMP-dependent protein kinase 1 OS=Mus musculus OX=10090 GN=Prkg1 PE=1 SV=1	15	11	12	11	671	76.3	6.04	23.4	92.8	90.8	90.4	106.4	114.4	105.3	0.840233	0.00422532	19091
Q64378	Fkbp5	Peptidyl-prolyl cis-trans isomerase FKBP5 OS=Mus musculus OX=10090 GN=Fkbp5 PE=1 SV=1	20	8	10	8	456	50.9	7.8	13.96	108.9	119.1	107.4	83.5	98.8	82.3	1.26757	0.0216994	14229
A6X8Z5	Arhgap31	Rho GTPase-activating protein 31 OS=Mus musculus OX=10090 GN=Arhgap31 PE=1 SV=1	9	10	11	10	1425	155.2	5.77	15	85.4	87.3	85	111.6	118.6	112.2	0.752629	0.000275019	12549
Q8K3H0	Appl1	DCC-interacting protein 13-alpha OS=Mus musculus OX=10090 GN=Appl1 PE=1 SV=1	17	10	14	9	707	79.3	5.41	14.11	107.9	102.8	105.6	94.3	90.1	99.3	1.11491	0.0232965	72993
Q9JIW9	Ralb	Ras-related protein Ral-B OS=Mus musculus OX=10090 GN=Ralb PE=1 SV=1	25	5	10	4	206	23.3	6.62	17.13	94.7	97.5	90.1	104.8	105.8	107.1	0.888574	0.0063975	64143
A0A140LHA2	Bub3	Mitotic checkpoint protein BUB3 OS=Mus musculus OX=10090 GN=Bub3 PE=1 SV=1	36	9	10	9	324	36.7	6.84	22.4	103.3	102.5	102.7	98.4	96.8	96.3	1.05832	0.00111679	12237
Q9WUQ2	Preb	Prolactin regulatory element-binding protein OS=Mus musculus OX=10090 GN=Preb PE=1 SV=1	21	7	7	7	417	45.4	8.76	18.37	99.6	99.6	101.8	104.9	90.3	103.7	1.00703	0.889663	50907
E9PZ43	Map4	Microtubule-associated protein OS=Mus musculus OX=10090 GN=Map4 PE=1 SV=3	12	11	15	1	933	97.7	9.09	19.21	95.1	94.4	90.9	104.4	104.5	110.8	0.877072	0.00619389	17758
P11031	Sub1	Activated RNA polymerase II transcriptional coactivator p15 OS=Mus musculus OX=10090 GN=Sub1 PE=1 SV=3	46	7	14	7	127	14.4	9.6	17.81	128.4	122.2	122.2	72.8	77.4	76.9	1.64157	4.33107e-05	20024
Q5SUA5	Myo1g	Unconventional myosin-Ig OS=Mus musculus OX=10090 GN=Myo1g PE=1 SV=1	12	10	11	9	1024	117.2	8.59	22.77	124.7	122.9	130.4	69.3	76	76.7	1.7027	9.10742e-05	246177
Q8CAS9	Parp9	Poly [ADP-ribose] polymerase 9 OS=Mus musculus OX=10090 GN=Parp9 PE=1 SV=2	15	10	11	10	866	96.6	7.09	13.74	108.3	113.1	111	93	83.1	91.5	1.24215	0.00307558	80285
Q9DCL9	Paics	Multifunctional protein ADE2 OS=Mus musculus OX=10090 GN=Paics PE=1 SV=4	18	7	10	7	425	47	7.23	25.08	97.9	95.7	97.8	106.3	100.8	101.5	0.944264	0.0375256	67054
Q9QXD8	Limd1	LIM domain-containing protein 1 OS=Mus musculus OX=10090 GN=Limd1 PE=1 SV=2	12	6	8	6	668	71.4	6.32	21.32	90.4	88	87.8	108.8	111.4	113.7	0.797245	0.000162991	29806
Q9DBC7	Prkar1a	cAMP-dependent protein kinase type I-alpha regulatory subunit OS=Mus musculus OX=10090 GN=Prkar1a PE=1 SV=3	18	8	9	8	381	43.2	5.35	25.04	102.1	102.1	102.3	98.7	96.7	98.2	1.04394	0.00206541	19084
Q61074	Ppm1g	Protein phosphatase 1G OS=Mus musculus OX=10090 GN=Ppm1g PE=1 SV=3	15	8	15	8	542	58.7	4.39	26.8	106.4	104.1	104.6	96.1	94.3	94.5	1.106	0.00036568	14208
Q9D020	Nt5c3a	Cytosolic 5'-nucleotidase 3A OS=Mus musculus OX=10090 GN=Nt5c3a PE=1 SV=4	27	8	12	8	331	37.2	6.65	17.13	114.5	118.6	114.5	82.8	91.1	78.5	1.37718	0.0012933	-
P25206	Mcm3	DNA replication licensing factor MCM3 OS=Mus musculus OX=10090 GN=Mcm3 PE=1 SV=2	14	9	13	9	812	91.5	5.55	17.6	142.6	147.1	147.6	57.8	49.5	55.4	2.68777	6.29157e-06	17215
Q3TN85	Rad23a	UV excision repair protein RAD23 homolog A (Fragment) OS=Mus musculus OX=10090 GN=Rad23a PE=1 SV=1	25	8	12	6	322	34.8	4.69	20.67	99.3	93.9	97.8	103.6	102.4	103	0.941748	0.0218728	19358
Q9R0Y5	Ak1	Adenylate kinase isoenzyme 1 OS=Mus musculus OX=10090 GN=Ak1 PE=1 SV=1	29	7	11	7	194	21.5	5.81	19.43	84.5	84.8	84.2	112.4	118.6	115.3	0.732024	6.71745e-05	11636
Q64516	Gk	Glycerol kinase OS=Mus musculus OX=10090 GN=Gk PE=1 SV=2	21	11	13	11	559	61.2	5.87	19.44	115.4	117.9	117.4	84.8	82.4	82.1	1.40674	7.86889e-06	14933
P58021	Tm9sf2	Transmembrane 9 superfamily member 2 OS=Mus musculus OX=10090 GN=Tm9sf2 PE=1 SV=1	14	7	12	7	662	75.3	7.43	18.85	105.6	106.9	113.1	93.9	97.1	83.5	1.18616	0.0224668	68059
Q91XD2	Lims2	LIM and senescent cell antigen-like-containing domain protein 2 OS=Mus musculus OX=10090 GN=Lims2 PE=1 SV=1	20	7	14	3	341	39	7.97	21.29	83	92.9	93	106.6	112.5	112.1	0.811896	0.00557861	225341
Q06770	Serpina6	Corticosteroid-binding globulin OS=Mus musculus OX=10090 GN=Serpina6 PE=1 SV=1	12	5	9	5	397	44.7	5.24	21.08	87.3	83.3	83.2	118.7	114.3	113.2	0.733102	0.000139374	12401
P28654	Dcn	Decorin OS=Mus musculus OX=10090 GN=Dcn PE=1 SV=1	25	9	13	8	354	39.8	8.68	17.56	72.6	71.4	70.6	128.5	131.1	125.8	0.556824	4.07573e-06	13179
Q8C129	Lnpep	Leucyl-cystinyl aminopeptidase OS=Mus musculus OX=10090 GN=Lnpep PE=1 SV=1	10	9	10	9	1025	117.2	5.96	16.48	101.9	103.8	110.5	92.2	93.3	98.3	1.11416	0.0282836	240028
Q925F2	Esam	Endothelial cell-selective adhesion molecule OS=Mus musculus OX=10090 GN=Esam PE=1 SV=1	24	6	8	6	394	41.8	9.26	17.06	82.6	88	80.9	122.2	108.7	117.7	0.721457	0.00199472	69524
B2RXC1	Trappc11	Trafficking protein particle complex subunit 11 OS=Mus musculus OX=10090 GN=Trappc11 PE=1 SV=1	8	8	11	8	1133	128.3	7.58	17.52	103.8	99.2	99.5	97.4	99.7	100.4	1.01681	0.39247	320714
G5E8R4	Ppp6r3	SAPS domain family, member 3, isoform CRA_c OS=Mus musculus OX=10090 GN=Ppp6r3 PE=1 SV=1	12	9	12	9	873	97.8	4.58	17.63	89.6	95.7	94.1	107.4	105.4	107.8	0.871491	0.00223122	52036
Q9D6Y7	Msra	Mitochondrial peptide methionine sulfoxide reductase OS=Mus musculus OX=10090 GN=Msra PE=1 SV=1	42	7	10	7	233	26	8.41	20.72	105.8	100.5	102.2	99.9	93.1	98.5	1.05832	0.0944381	110265
Q61093	Cybb	Cytochrome b-245 heavy chain OS=Mus musculus OX=10090 GN=Cybb PE=1 SV=1	13	9	12	9	570	65.3	7.72	14.97	126.8	129.5	132.3	66.1	72.6	72.7	1.83822	2.58273e-05	13058
P35821	Ptpn1	Tyrosine-protein phosphatase non-receptor type 1 OS=Mus musculus OX=10090 GN=Ptpn1 PE=1 SV=2	15	6	10	6	432	49.6	6.16	18.24	129	126.3	127.4	74.4	66.3	76.6	1.76116	6.89529e-05	19246
P53395	Dbt	Lipoamide acyltransferase component of branched-chain alpha-keto acid dehydrogenase complex, mitochondrial OS=Mus musculus OX=10090 GN=Dbt PE=1 SV=2	21	9	13	9	482	53.2	8.6	19.84	81.5	83.9	82.1	118.7	113.1	120.7	0.702128	0.000125682	13171
Q9Z0P4	Palm	Paralemmin-1 OS=Mus musculus OX=10090 GN=Palm PE=1 SV=1	30	10	12	9	383	41.6	4.84	12.28	91.5	88.6	92.2	108.8	106.5	112.3	0.831197	0.000791597	18483
Q9CQA3	Sdhb	Succinate dehydrogenase [ubiquinone] iron-sulfur subunit, mitochondrial OS=Mus musculus OX=10090 GN=Sdhb PE=1 SV=1	34	9	11	9	282	31.8	8.68	15.15	107	101.7	102.8	94.6	94.4	99.6	1.07935	0.0312416	67680
Q99JR1	Sfxn1	Sideroflexin-1 OS=Mus musculus OX=10090 GN=Sfxn1 PE=1 SV=3	28	7	9	7	322	35.6	9.23	20.48	106.1	104.5	104.4	91.4	97	96.6	1.10526	0.00607701	14057
Q7M6Y3	Picalm	Phosphatidylinositol-binding clathrin assembly protein OS=Mus musculus OX=10090 GN=Picalm PE=1 SV=1	12	7	9	7	660	71.5	7.91	15.17	102.1	102.6	100.4	98.4	98.1	98.4	1.03459	0.00723234	233489
P16460	Ass1	Argininosuccinate synthase OS=Mus musculus OX=10090 GN=Ass1 PE=1 SV=1	14	8	14	8	412	46.6	8.22	21.33	96.1	95.2	92.7	107.7	104.8	103.4	0.899019	0.00281354	11898
H3BJU7	Arhgef2	Rho guanine nucleotide exchange factor 2 OS=Mus musculus OX=10090 GN=Arhgef2 PE=1 SV=1	10	9	12	9	956	108.5	6.87	22.55	100.1	106.2	103.8	92	96.9	101	1.06968	0.0992756	16800
B7ZC46	Sept8	Septin-8 OS=Mus musculus OX=10090 GN=Sept8 PE=1 SV=1	15	7	18	4	440	50.9	6.09	20.68	102.5	96.9	99.2	98.8	102.5	100.1	0.99071	0.657723	#N/A
P62317	Snrpd2	Small nuclear ribonucleoprotein Sm D2 OS=Mus musculus OX=10090 GN=Snrpd2 PE=1 SV=1	61	7	11	7	118	13.5	9.91	21.69	110.7	107.8	118.6	92.3	79.1	91.5	1.28224	0.0098882	107686
Q61033	Tmpo	Lamina-associated polypeptide 2, isoforms alpha/zeta OS=Mus musculus OX=10090 GN=Tmpo PE=1 SV=4	19	9	12	6	693	75.1	8.05	15.21	89.8	116.6	103.3	95.3	100.2	94.9	1.06646	0.462305	21917
P52825	Cpt2	Carnitine O-palmitoyltransferase 2, mitochondrial OS=Mus musculus OX=10090 GN=Cpt2 PE=1 SV=2	20	10	11	10	658	73.9	8.37	19.84	98.4	102.1	99.2	101.6	100.8	97.9	0.998002	0.905944	12896
Q58A65	Spag9	C-Jun-amino-terminal kinase-interacting protein 4 OS=Mus musculus OX=10090 GN=Spag9 PE=1 SV=2	9	10	10	9	1321	146.1	5.15	16.2	97.5	96.3	96.7	105.6	100.6	103.3	0.938611	0.0130732	70834
K3W4S6	Gyg	Glycogenin OS=Mus musculus OX=10090 GN=Gyg PE=1 SV=1	14	4	8	4	377	41.9	6.02	20.92	101.2	101.4	100.6	98.6	101.8	96.4	1.02156	0.249804	27357
Q9Z0N1	Eif2s3x	Eukaryotic translation initiation factor 2 subunit 3, X-linked OS=Mus musculus OX=10090 GN=Eif2s3x PE=1 SV=2	25	10	13	10	472	51	8.4	17.45	112.8	106.1	112	91.8	86.3	91	1.22965	0.00163309	26905
Q60766	Irgm1	Immunity-related GTPase family M protein 1 OS=Mus musculus OX=10090 GN=Irgm1 PE=1 SV=1	17	7	12	7	409	46.5	8.28	29.92	123.6	120.7	119.2	75.6	79.7	81.2	1.537	3.66974e-05	15944
Q9DAW9	Cnn3	Calponin-3 OS=Mus musculus OX=10090 GN=Cnn3 PE=1 SV=1	27	7	9	5	330	36.4	5.72	20.58	72.9	77.9	73	123.3	130.3	122.6	0.594896	6.77007e-05	71994
P31938	Map2k1	Dual specificity mitogen-activated protein kinase kinase 1 OS=Mus musculus OX=10090 GN=Map2k1 PE=1 SV=2	17	8	12	4	393	43.4	6.7	14.12	115	114	115.5	87.2	80.4	88	1.34781	0.000268475	26395
P48758	Cbr1	Carbonyl reductase [NADPH] 1 OS=Mus musculus OX=10090 GN=Cbr1 PE=1 SV=3	27	7	11	7	277	30.6	8.31	20.73	95.9	93.8	94.3	110.2	99	106.8	0.898734	0.0341751	12408
Q922Q1	Marc2	Mitochondrial amidoxime reducing component 2 OS=Mus musculus OX=10090 GN=Marc2 PE=1 SV=1	22	8	15	8	338	38.2	8.68	26.45	103.5	101.6	102.6	93.2	100.4	98.8	1.05233	0.086109	#N/A
A0A0A6YWM5	Rab3gap2	Rab3 GTPase-activating protein non-catalytic subunit OS=Mus musculus OX=10090 GN=Rab3gap2 PE=1 SV=1	7	10	12	10	1367	152.4	6.18	14.68	102.8	108.7	105.2	91.2	95.6	96.4	1.11829	0.00903097	98732
Q91W86	Vps11	Vacuolar protein sorting-associated protein 11 homolog OS=Mus musculus OX=10090 GN=Vps11 PE=1 SV=3	13	11	13	10	941	107.7	7.01	18.1	108.4	109.2	107.7	89.1	91.6	94.1	1.18377	0.000365672	71732
Q9CPR4	Rpl17	60S ribosomal protein L17 OS=Mus musculus OX=10090 GN=Rpl17 PE=1 SV=3	28	6	25	5	184	21.4	10.18	35.72	106.7	102.6	105.3	94.8	95.6	95	1.10231	0.0013672	319195
Q08091	Cnn1	Calponin-1 OS=Mus musculus OX=10090 GN=Cnn1 PE=1 SV=1	25	7	11	6	297	33.3	8.97	25.96	71.1	68.8	70.8	132.7	125.3	131.3	0.541228	1.52054e-05	12797
Q8K1N2	Phldb2	Pleckstrin homology-like domain family B member 2 OS=Mus musculus OX=10090 GN=Phldb2 PE=1 SV=2	9	11	12	11	1249	141.4	7.68	18.23	96.3	99	94.6	96.9	112.3	100.9	0.93486	0.23237	208177
P46412	Gpx3	Glutathione peroxidase 3 OS=Mus musculus OX=10090 GN=Gpx3 PE=1 SV=2	32	6	17	6	226	25.4	8.22	19.04	94.8	94.8	93.1	112.1	96.8	108.4	0.890955	0.0679375	14778
Q6IRU5	Cltb	Clathrin light chain B OS=Mus musculus OX=10090 GN=Cltb PE=1 SV=1	25	8	13	8	229	25.2	4.63	29.75	95.5	96.3	99.3	102.7	103.6	102.5	0.942681	0.00806754	74325
Q9D2G2	Dlst	Dihydrolipoyllysine-residue succinyltransferase component of 2-oxoglutarate dehydrogenase complex, mitochondrial OS=Mus musculus OX=10090 GN=Dlst PE=1 SV=1	14	7	12	7	454	49	8.95	23.17	105.5	101.5	101.1	99.1	93.3	99.5	1.0555	0.0919333	78920
Q8BXZ1	Tmx3	Protein disulfide-isomerase TMX3 OS=Mus musculus OX=10090 GN=Tmx3 PE=1 SV=2	21	8	12	8	456	51.8	5.16	18.81	97.5	99.2	101.2	100.8	100.1	101.2	0.986097	0.278169	67988
A2AQ07	Tubb1	Tubulin beta-1 chain OS=Mus musculus OX=10090 GN=Tubb1 PE=1 SV=1	20	9	14	5	451	50.4	5.07	20.11	74	85	79.7	121	117.7	122.7	0.660487	0.000306254	545486
Q62418	Dbnl	Drebrin-like protein OS=Mus musculus OX=10090 GN=Dbnl PE=1 SV=2	22	9	15	9	436	48.7	4.92	20.85	104.4	106.9	106.3	95.5	92.7	94.2	1.12465	0.000446159	13169
P54728	Rad23b	UV excision repair protein RAD23 homolog B OS=Mus musculus OX=10090 GN=Rad23b PE=1 SV=2	11	6	11	4	416	43.5	4.83	21.12	105.1	101	103.3	92.6	108.1	89.9	1.06469	0.340237	19359
A0A0J9YUM4	Ctbp1	C-terminal-binding protein 1 OS=Mus musculus OX=10090 GN=Ctbp1 PE=1 SV=1	20	6	10	4	337	37	6.74	17.38	106.1	107.3	110.9	94.2	89.4	92.1	1.17628	0.00126878	13016
P29387	Gnb4	Guanine nucleotide-binding protein subunit beta-4 OS=Mus musculus OX=10090 GN=Gnb4 PE=1 SV=4	25	7	12	4	340	37.4	6.16	17.31	96	95.4	104.9	104	102.9	96.7	0.975955	0.558827	14696
Q9QVP4	Myl7	Myosin regulatory light chain 2, atrial isoform OS=Mus musculus OX=10090 GN=Myl7 PE=1 SV=1	34	5	10	5	175	19.4	4.81	20.05	75	71.9	76	131.2	122.7	123.2	0.59109	6.96792e-05	17898
Q3TUQ7	Prkaa1	Non-specific serine/threonine protein kinase OS=Mus musculus OX=10090 GN=Prkaa1 PE=1 SV=1	21	10	13	10	550	62.7	7.59	16.78	98.1	105	99.7	94	102.3	100.8	1.01919	0.595277	105787
Q3TGG2	Atxn2l	Ataxin-2-like protein OS=Mus musculus OX=10090 GN=Atxn2l PE=1 SV=1	12	12	12	12	994	105.4	7.97	17.31	96.9	87.9	87.7	107.3	109.2	111	0.832061	0.00468214	233871
P51437	Camp	Cathelicidin antimicrobial peptide OS=Mus musculus OX=10090 GN=Camp PE=1 SV=2	46	5	12	5	172	19.4	8.68	23.48	136.9	135.6	137.4	62.4	64.3	63.2	2.1585	7.24379e-08	12796
A0A2U3TZ82	Triobp	TRIO and F-actin-binding protein OS=Mus musculus OX=10090 GN=Triobp PE=4 SV=1	18	11	11	10	627	71.6	6.86	15.15	98.4	93.9	96.6	104.6	98.7	107.8	0.92864	0.0672932	110253
B2RSU6	Cgnl1	Cingulin-like 1 OS=Mus musculus OX=10090 GN=Cgnl1 PE=1 SV=1	7	9	9	9	1297	148.1	5.77	17.38	91.3	97.3	95.3	98.5	120	97.5	0.898418	0.229281	68178
E9Q1Z0	Krt90	Keratin 90 OS=Mus musculus OX=10090 GN=Krt90 PE=1 SV=1	9	9	16	1	538	58.2	8.25	23.26	78.5	90.6	85.6	112.7	126	106.7	0.737406	0.0107013	239673
P97450	Atp5j	ATP synthase-coupling factor 6, mitochondrial OS=Mus musculus OX=10090 GN=Atp5j PE=1 SV=1	44	5	15	5	108	12.5	9.36	19.14	102.1	99.6	100.6	99.6	102.4	95.8	1.01511	0.504097	11957
O35638	Stag2	Cohesin subunit SA-2 OS=Mus musculus OX=10090 GN=Stag2 PE=1 SV=3	7	10	12	7	1231	141.2	5.43	22.7	104.8	101.9	101.5	97	99.4	95.3	1.05656	0.0253151	20843
Q3UHJ0	Aak1	AP2-associated protein kinase 1 OS=Mus musculus OX=10090 GN=Aak1 PE=1 SV=2	16	9	10	9	959	103.3	6.7	9.27	90.9	86.4	99.4	110.3	110.4	102.5	0.856126	0.0285017	269774
P68181	Prkacb	cAMP-dependent protein kinase catalytic subunit beta OS=Mus musculus OX=10090 GN=Prkacb PE=1 SV=2	16	6	9	3	351	40.7	8.56	19.64	98.2	101.2	102	101.6	96.5	100.5	1.00938	0.654545	18749
Q9ES52	Inpp5d	Phosphatidylinositol 3,4,5-trisphosphate 5-phosphatase 1 OS=Mus musculus OX=10090 GN=Inpp5d PE=1 SV=2	10	12	12	12	1191	133.5	7.8	20.18	113	110.5	113.3	87.2	83.4	92.7	1.27915	0.000995061	16331
Q8VCR2	Hsd17b13	17-beta-hydroxysteroid dehydrogenase 13 OS=Mus musculus OX=10090 GN=Hsd17b13 PE=1 SV=2	17	6	10	4	304	33.4	8.88	20.25	29.6	31.8	31.5	161.1	175.8	170.3	0.183162	5.83048e-06	243168
P27661	H2afx	Histone H2AX OS=Mus musculus OX=10090 GN=H2afx PE=1 SV=2	48	7	29	3	143	15.1	10.74	55	113.8	113	113.9	86.3	84.7	88.3	1.31392	1.48811e-05	-
Q9QYS9	Qki	Protein quaking OS=Mus musculus OX=10090 GN=Qki PE=1 SV=1	24	7	8	7	341	37.6	8.56	15.48	96.9	101.4	101.6	96.3	102.9	100.8	0.999667	0.989915	-
A0A0R4J0B2	Plbd1	Phospholipase B-like OS=Mus musculus OX=10090 GN=Plbd1 PE=1 SV=1	19	9	12	9	550	63	8.87	13.29	135.3	128.3	130.3	66.1	68.3	71.7	1.91121	1.88473e-05	66857
Q8BFR4	Gns	N-acetylglucosamine-6-sulfatase OS=Mus musculus OX=10090 GN=Gns PE=1 SV=1	15	7	11	7	544	61.1	8.24	20.89	128	127.3	126.6	71.9	72.8	73.4	1.75103	8.42184e-08	75612
G5E850	Cyb5a	Cytochrome b-5, isoform CRA_a OS=Mus musculus OX=10090 GN=Cyb5a PE=1 SV=1	56	4	8	4	98	11.1	5.3	19.52	92.8	89.7	89.1	107.2	112.1	109.1	0.82704	0.000492571	109672
Q9DBS1	Tmem43	Transmembrane protein 43 OS=Mus musculus OX=10090 GN=Tmem43 PE=1 SV=1	23	9	13	9	400	44.8	7.36	21.88	99	100.4	93.2	105.5	103.7	98.2	0.951854	0.187985	74122
Q9WUR2	Eci2	Enoyl-CoA delta isomerase 2, mitochondrial OS=Mus musculus OX=10090 GN=Eci2 PE=1 SV=2	20	6	7	6	391	43.2	8.92	16.5	92.5	88.8	90.4	94.7	98.6	134.9	0.827849	0.216459	23986
Q9EQG3	Scel	Sciellin OS=Mus musculus OX=10090 GN=Scel PE=1 SV=2	13	9	10	9	652	72.9	9.47	19.75	71.9	69.9	70.9	129.2	128.4	129.7	0.549187	1.18708e-07	64929
Q4FJZ2	Kpna6	Importin subunit alpha OS=Mus musculus OX=10090 GN=Kpna6 PE=1 SV=1	14	8	9	5	533	59.6	4.98	12.41	104.5	101.8	105.8	97.1	94.2	96.7	1.08368	0.00568294	16650
Q64674	Srm	Spermidine synthase OS=Mus musculus OX=10090 GN=Srm PE=1 SV=1	25	7	10	7	302	34	5.5	23.84	114.8	110.1	107.4	87.4	94.3	86.1	1.24085	0.00299273	20810
Q8BH40	Stx7	Syntaxin-7 OS=Mus musculus OX=10090 GN=Stx7 PE=1 SV=1	23	5	7	5	261	29.7	5.58	19.32	103.2	96.2	102.6	101.3	92.6	104.1	1.01342	0.762644	53331
D3Z7P3	Gls	Glutaminase kidney isoform, mitochondrial OS=Mus musculus OX=10090 GN=Gls PE=1 SV=1	18	10	11	10	674	73.9	7.99	18	106.4	108.8	107.6	93.6	90.6	93	1.1645	0.000188609	14660
Q99K85	Psat1	Phosphoserine aminotransferase OS=Mus musculus OX=10090 GN=Psat1 PE=1 SV=1	30	10	13	10	370	40.4	8.03	15.16	94.6	95.7	102.9	105.5	102.8	98.4	0.955983	0.247359	107272
G5E8T6	Magi3	Membrane associated guanylate kinase, WW and PDZ domain containing 3, isoform CRA_a OS=Mus musculus OX=10090 GN=Magi3 PE=1 SV=1	8	12	12	12	1476	161.5	8.05	10.94	86	90.2	88.1	110.3	113.9	111.5	0.78731	0.000121708	99470
E9QPI5	Pds5a	Sister chromatid cohesion protein PDS5 homolog A OS=Mus musculus OX=10090 GN=Pds5a PE=1 SV=1	10	13	15	11	1332	150.1	7.85	18.47	111.2	111	108.2	90.2	88	91.5	1.22506	0.000136087	71521
A0A140T8Q1	Igkv12-41	Protein Igkv12-41 (Fragment) OS=Mus musculus OX=10090 GN=Igkv12-41 PE=1 SV=2	41	4	9	2	115	12.6	8.31	25.73	150.3	145.6	149	53	51.9	50.4	2.86478	4.41854e-07	-
Q8C754	Vps52	Vacuolar protein sorting-associated protein 52 homolog OS=Mus musculus OX=10090 GN=Vps52 PE=1 SV=1	17	9	10	9	723	82	5.9	19.6	104.5	105.3	103.6	94.2	97.2	95.3	1.09313	0.000895926	224705
P83882	Rpl36a	60S ribosomal protein L36a OS=Mus musculus OX=10090 GN=Rpl36a PE=3 SV=2	39	6	13	6	106	12.4	10.58	20.41	106.7	101.7	102.8	98	94.3	96.5	1.07756	0.0159081	19982
Q8CFX3	Pcdh1	Protocadherin 1 OS=Mus musculus OX=10090 GN=Pcdh1 PE=1 SV=1	10	8	10	8	1038	112.3	5.02	16.84	87.8	86.9	92.3	113.1	96.3	123.6	0.801802	0.0536475	75599
P31324	Prkar2b	cAMP-dependent protein kinase type II-beta regulatory subunit OS=Mus musculus OX=10090 GN=Prkar2b PE=1 SV=3	13	4	7	2	416	46.1	4.98	17.07	108.4	97.5	104.2	97.2	93.2	99.6	1.06931	0.142953	19088
A0A0R3P9C8	Ndufa9	NADH dehydrogenase [ubiquinone] 1 alpha subcomplex subunit 9, mitochondrial OS=Mus musculus OX=10090 GN=Ndufa9 PE=1 SV=1	16	7	9	7	373	42.1	9.09	20.51	106.7	106	105.3	91.1	97.3	93.6	1.12766	0.00288746	66108
P97369	Ncf4	Neutrophil cytosol factor 4 OS=Mus musculus OX=10090 GN=Ncf4 PE=1 SV=2	26	7	9	7	339	38.7	6.21	10.83	128.5	127.2	123.3	75.2	70.5	75.3	1.71493	1.88745e-05	17972
F7C9H0	Postn	Periostin (Fragment) OS=Mus musculus OX=10090 GN=Postn PE=1 SV=1	58	5	13	2	102	11.7	9.85	18.45	99.8	96.1	110.1	97.5	94.9	101.5	1.04117	0.43077	50706
A0A0A6YW80	Naa15	N-alpha-acetyltransferase 15, NatA auxiliary subunit OS=Mus musculus OX=10090 GN=Naa15 PE=1 SV=1	13	12	13	12	815	95.2	6.98	17.62	115	114.1	112.9	86.1	85.3	86.6	1.32558	2.56109e-06	74838
P55258	Rab8a	Ras-related protein Rab-8A OS=Mus musculus OX=10090 GN=Rab8a PE=1 SV=2	35	8	15	4	207	23.7	9.07	26.05	109.5	106	110.3	94.6	85.4	94.1	1.18862	0.00618204	17274
Q8BFY9	Tnpo1	Transportin-1 OS=Mus musculus OX=10090 GN=Tnpo1 PE=1 SV=2	10	8	11	7	898	102.3	4.98	18.28	103.5	101.8	103.7	94.6	101.2	95.3	1.06149	0.0519431	238799
Q9QUJ7	Acsl4	Long-chain-fatty-acid--CoA ligase 4 OS=Mus musculus OX=10090 GN=Acsl4 PE=1 SV=2	13	9	12	9	711	79	8.28	24.06	120.5	118.3	120.2	82	78.1	80.9	1.48963	8.25864e-06	50790
A0A1D5RLD1	Myo9b	Unconventional myosin-IXb OS=Mus musculus OX=10090 GN=Myo9b PE=1 SV=1	5	9	10	9	1963	222.5	8.4	17.18	119.4	115.2	118.4	84.6	82.4	80.1	1.42857	4.11547e-05	17925
Q99LD4	Gps1	COP9 signalosome complex subunit 1 OS=Mus musculus OX=10090 GN=Gps1 PE=1 SV=1	15	7	11	7	471	53.4	6.84	19.72	100.4	104.5	104	95.7	96.8	98.7	1.06078	0.0194269	209318
Q3UGR5	Hdhd2	Haloacid dehalogenase-like hydrolase domain-containing protein 2 OS=Mus musculus OX=10090 GN=Hdhd2 PE=1 SV=2	26	6	9	6	259	28.7	6.05	17.5	94.7	95.9	96.9	104.5	102.4	105.7	0.919706	0.00192872	76987
P63213	Gng2	Guanine nucleotide-binding protein G(I)/G(S)/G(O) subunit gamma-2 OS=Mus musculus OX=10090 GN=Gng2 PE=1 SV=2	62	4	11	4	71	7.8	7.99	18.23	98.4	99.8	97	102.5	103.1	99.2	0.968504	0.0930624	14702
Q9CY27	Tecr	Very-long-chain enoyl-CoA reductase OS=Mus musculus OX=10090 GN=Tecr PE=1 SV=1	20	9	15	9	308	36.1	9.55	22	104.1	103	105.1	96.1	94.4	97.3	1.08478	0.00142783	106529
A2AQJ8	Ganc	Neutral alpha-glucosidase C OS=Mus musculus OX=10090 GN=Ganc PE=1 SV=1	13	11	12	11	913	103.6	6.32	10.48	96	99.3	97.4	103.1	101.9	102.4	0.95218	0.00855319	76051
P42208	Sept2	Septin-2 OS=Mus musculus OX=10090 GN=Sept2 PE=1 SV=2	28	7	11	7	361	41.5	6.55	16.49	102.9	98.8	97.7	98.9	96.4	105.3	0.996008	0.903142	#N/A
P18528		Ig heavy chain V region 6.96 OS=Mus musculus OX=10090 PE=4 SV=1	31	2	5	1	98	11	7.93	15.5	144.2	140.3	140.8	55.1	58.1	61.5	2.43446	2.96762e-06	#N/A
Q8CBW3	Abi1	Abl interactor 1 OS=Mus musculus OX=10090 GN=Abi1 PE=1 SV=3	14	5	7	5	481	52.3	7.64	14.4	97.4	92.4	94.2	104.9	102.9	108.2	0.898734	0.00741618	11308
Q6NSR8	Npepl1	Probable aminopeptidase NPEPL1 OS=Mus musculus OX=10090 GN=Npepl1 PE=1 SV=1	19	8	10	8	524	55.9	6.84	10.7	100.8	100.2	100.5	101.2	99.1	98.2	1.01005	0.331416	228961
A2A513	Krt10	Keratin, type I cytoskeletal 10 OS=Mus musculus OX=10090 GN=Krt10 PE=1 SV=1	8	6	11	4	561	57	5.07	27.49	91.3	95.5	97.4	104.9	100.7	110.1	0.900222	0.0323066	16661
D3YYK8	Mapre2	Microtubule-associated protein RP/EB family member 2 (Fragment) OS=Mus musculus OX=10090 GN=Mapre2 PE=1 SV=1	43	8	12	6	260	29.4	6.44	19.16	95.1	92.7	94.8	107.7	108.2	101.6	0.890079	0.00667045	212307
Q9CQF9	Pcyox1	Prenylcysteine oxidase OS=Mus musculus OX=10090 GN=Pcyox1 PE=1 SV=1	13	6	9	6	505	56.5	6.92	16.94	95.6	105.1	102.6	94.4	108.8	93.6	1.0219	0.723118	66881
Q8VDK1	Nit1	Deaminated glutathione amidase OS=Mus musculus OX=10090 GN=Nit1 PE=1 SV=2	21	6	8	6	323	35.7	7.94	13.54	96.7	105.9	95.7	105.2	99.6	96.9	0.988731	0.794144	27045
Q8VBZ3	Clptm1	Cleft lip and palate transmembrane protein 1 homolog OS=Mus musculus OX=10090 GN=Clptm1 PE=1 SV=1	12	5	7	5	664	75.2	6.3	11.3	107.7	107.2	108.7	96.8	90.6	89	1.17077	0.00288391	56457
Q3UMF0	Cobll1	Cordon-bleu protein-like 1 OS=Mus musculus OX=10090 GN=Cobll1 PE=1 SV=2	11	10	11	10	1273	137.3	8.16	11.68	88.2	92	88.2	113.5	111.8	106.2	0.809653	0.00116639	319876
Q99LB4	Capg	Capping protein (Actin filament), gelsolin-like OS=Mus musculus OX=10090 GN=Capg PE=1 SV=1	19	5	11	5	349	38.7	6.95	21.98	112.8	119.9	123.1	79.1	81.6	83.5	1.457	0.000352638	12332
F6WR04	Ctss	Cathepsin S OS=Mus musculus OX=10090 GN=Ctss PE=1 SV=1	24	6	10	6	341	38.6	7.15	11.96	139.8	134.4	137.6	62.2	62.2	63.8	2.1881	1.45722e-06	13040
F6W2Q5	Eps15	Epidermal growth factor receptor substrate 15 OS=Mus musculus OX=10090 GN=Eps15 PE=1 SV=1	13	10	12	10	764	83.5	4.69	11.37	102.5	104.6	98.6	92.6	99.2	102.4	1.03909	0.319918	13858
P15532	Nme1	Nucleoside diphosphate kinase A OS=Mus musculus OX=10090 GN=Nme1 PE=1 SV=1	43	7	15	2	152	17.2	7.37	16.3	93.8	97.5	102.1	90.5	107.9	108.2	0.956947	0.524887	18102
Q8K0U4	Hspa12a	Heat shock 70 kDa protein 12A OS=Mus musculus OX=10090 GN=Hspa12a PE=1 SV=1	12	8	9	7	675	74.8	6.77	12.25	75.4	84.3	81.2	118.5	121.9	118.6	0.671031	0.000156478	73442
Q99JF8	Psip1	PC4 and SFRS1-interacting protein OS=Mus musculus OX=10090 GN=Psip1 PE=1 SV=1	23	11	12	11	528	59.7	9.13	16.67	106.1	108.6	105.1	93.9	91	95.3	1.14133	0.00129095	101739
Q9CQI1	Sftpa1	MCG1040641, isoform CRA_a OS=Mus musculus OX=10090 GN=Sftpa1 PE=1 SV=1	17	5	14	5	248	26.2	5.43	26.6	90.5	91.4	89.6	111.1	105.9	111.4	0.826736	0.000520537	20387
Q9ES46	Parvb	Beta-parvin OS=Mus musculus OX=10090 GN=Parvb PE=1 SV=1	16	5	8	5	365	41.6	6.33	16.38	81.4	85.3	84.2	117	116.8	115.1	0.719117	1.52637e-05	170736
O70325	Gpx4	Phospholipid hydroperoxide glutathione peroxidase OS=Mus musculus OX=10090 GN=Gpx4 PE=1 SV=4	35	7	10	7	197	22.2	8.46	25.06	92.1	98	97.1	108.9	99.1	104.6	0.918746	0.0663124	625249
H7BWY4	Dlg1	Disks large homolog 1 OS=Mus musculus OX=10090 GN=Dlg1 PE=1 SV=1	10	8	11	8	872	96.8	5.9	19.27	89.9	95.7	93.7	108	105.4	107.4	0.870636	0.0017947	13383
Q99P88	Nup155	Nuclear pore complex protein Nup155 OS=Mus musculus OX=10090 GN=Nup155 PE=1 SV=1	8	8	8	8	1391	155	6.15	14.86	109.9	111.4	107.8	90.3	91.5	89	1.21529	0.00010616	170762
Q6PGB6	Naa50	N-alpha-acetyltransferase 50 OS=Mus musculus OX=10090 GN=Naa50 PE=1 SV=1	54	8	11	8	169	19.4	8.81	17.66	103.5	106.3	106.5	97.1	93.9	92.7	1.11491	0.00264025	72117
Q6ZPJ3	Ube2o	(E3-independent) E2 ubiquitin-conjugating enzyme UBE2O OS=Mus musculus OX=10090 GN=Ube2o PE=1 SV=3	13	12	13	12	1288	140.7	5.06	8.86	92.3	91	89.9	112.7	109.1	105	0.835985	0.00155488	217342
Q8CHT0	Aldh4a1	Delta-1-pyrroline-5-carboxylate dehydrogenase, mitochondrial OS=Mus musculus OX=10090 GN=Aldh4a1 PE=1 SV=3	17	10	14	10	562	61.8	8.24	27.78	97.1	96.7	98.8	106.1	98.1	103.1	0.952164	0.112935	212647
P01807		Ig heavy chain V region X44 OS=Mus musculus OX=10090 PE=1 SV=1	40	4	9	4	119	13.2	7.94	20.26	135.1	130	134.9	67.2	61.4	71.4	2	3.73749e-05	#N/A
P04247	Mb	Myoglobin OS=Mus musculus OX=10090 GN=Mb PE=1 SV=3	27	6	10	6	154	17.1	7.62	17.82	46.3	47.1	48.9	160.1	141.1	156.5	0.310902	5.73978e-05	17189
O70172	Pip4k2a	Phosphatidylinositol 5-phosphate 4-kinase type-2 alpha OS=Mus musculus OX=10090 GN=Pip4k2a PE=1 SV=1	21	8	10	5	405	46.1	6.99	19.41	111.7	109.6	105.9	87.8	91.3	93.9	1.19853	0.00179973	18718
D3YYD0	Olfm4	Olfactomedin-4 OS=Mus musculus OX=10090 GN=Olfm4 PE=1 SV=1	13	6	9	6	538	60.9	6.7	12.56	126.9	120.8	121.9	77.6	75.3	77.6	1.60347	2.16636e-05	380924
Q9CYI4	Luc7l	Putative RNA-binding protein Luc7-like 1 OS=Mus musculus OX=10090 GN=Luc7l PE=1 SV=2	20	7	10	3	371	43.9	9.88	10.23	116.1	109	109.6	87.4	88.9	88.9	1.26207	0.000572352	66978
Q9DBK7	Uba7	MCG18845, isoform CRA_d OS=Mus musculus OX=10090 GN=Uba7 PE=1 SV=1	9	6	8	6	977	108.6	5.97	12.9	109.2	106	110.3	88	98.2	88.3	1.18579	0.00907448	74153
Q9JLN9	Mtor	Serine/threonine-protein kinase mTOR OS=Mus musculus OX=10090 GN=Mtor PE=1 SV=2	4	11	11	11	2549	288.6	7.17	18.78	98.1	104.6	96.7	101.8	101	97.7	0.996339	0.899943	56717
A0A0R4J0B4	Cmas	Cytidine monophospho-N-acetylneuraminic acid synthetase OS=Mus musculus OX=10090 GN=Cmas PE=1 SV=1	22	8	12	8	432	48	8.1	19.21	106	108.4	110.7	89.9	92.1	92.9	1.18261	0.000503481	12764
Q8R5C5	Actr1b	Beta-centractin OS=Mus musculus OX=10090 GN=Actr1b PE=1 SV=1	20	8	13	2	376	42.3	6.4	21.85	90.9	96.9	94.9	99.2	107.9	110.3	0.890674	0.0384197	226977
Q3TWW8	Srsf6	Serine/arginine-rich splicing factor 6 OS=Mus musculus OX=10090 GN=Srsf6 PE=1 SV=1	22	9	11	5	339	39	11.46	23.97	112.1	110.9	112.5	88.5	84.3	91.7	1.26843	0.000420313	67996
Q8K2Q9	Shtn1	Shootin-1 OS=Mus musculus OX=10090 GN=Shtn1 PE=1 SV=1	15	8	11	8	631	71.3	5.44	15.6	101.2	101.2	103.9	98.1	101.4	94.2	1.0429	0.137584	71653
Q8BYW9	Eogt	EGF domain-specific O-linked N-acetylglucosamine transferase OS=Mus musculus OX=10090 GN=Eogt PE=1 SV=1	18	9	10	9	527	61.4	6.81	21.26	101.8	103.2	102.1	95.5	100.2	97.2	1.04848	0.0301935	101351
O35215	Ddt	D-dopachrome decarboxylase OS=Mus musculus OX=10090 GN=Ddt PE=1 SV=3	65	6	8	6	118	13.1	6.54	19.42	91.9	88.7	91.8	110	108.2	109.3	0.831756	9.74214e-05	13202
Q3ULJ0	Gpd1l	Glycerol-3-phosphate dehydrogenase 1-like protein OS=Mus musculus OX=10090 GN=Gpd1l PE=1 SV=2	23	8	12	7	351	38.2	6.77	21.65	94.9	96.5	96.2	101.6	112.8	98.1	0.92032	0.136274	333433
P60764	Rac3	Ras-related C3 botulinum toxin substrate 3 OS=Mus musculus OX=10090 GN=Rac3 PE=1 SV=1	27	5	18	1	192	21.4	8.15	43.98	92.4	87.5	100.5	113.3	94.3	112	0.877347	0.143981	170758
Q9QZS3	Numb	Protein numb homolog OS=Mus musculus OX=10090 GN=Numb PE=1 SV=1	15	9	11	8	653	70.8	8.65	19.37	89.3	94.1	90.5	115.4	101.1	109.7	0.839669	0.0166401	18222
O88738	Birc6	Baculoviral IAP repeat-containing protein 6 OS=Mus musculus OX=10090 GN=Birc6 PE=1 SV=2	3	9	9	9	4882	531.8	6.07	12.71	113.5	107.3	104.6	92.6	94.2	87.9	1.18456	0.00646456	12211
Q9CZW5	Tomm70	Mitochondrial import receptor subunit TOM70 OS=Mus musculus OX=10090 GN=Tomm70 PE=1 SV=2	13	9	13	9	611	67.5	7.53	22.55	105.1	102.6	105.4	96.1	94.8	96	1.09132	0.000879651	-
G5E8K5	Ank3	Ankyrin-3 OS=Mus musculus OX=10090 GN=Ank3 PE=1 SV=1	6	11	11	9	1961	213.9	6.7	15.15	92.1	98.3	95.3	104.8	105	104.4	0.909293	0.00616428	11735
F8WJ05	Itih1	Inter-alpha-trypsin inhibitor heavy chain H1 OS=Mus musculus OX=10090 GN=Itih1 PE=1 SV=1	13	10	12	10	911	101.6	6.96	13.01	85.3	83.7	84.7	114.2	117.2	114.9	0.732602	7.08239e-06	16424
P68404	Prkcb	Protein kinase C beta type OS=Mus musculus OX=10090 GN=Prkcb PE=1 SV=4	9	6	7	1	671	76.7	7.01	16.82							#DIV/0!	#DIV/0!	18751
G3UXL2	Prps1l3	Phosphoribosyl pyrophosphate synthetase 1-like 3 OS=Mus musculus OX=10090 GN=Prps1l3 PE=3 SV=1	26	8	11	5	318	34.8	6.98	16.67	112.2	106.2	109.5	89.2	90.4	92.5	1.20507	0.000722466	328099
O54950	Prkag1	5'-AMP-activated protein kinase subunit gamma-1 OS=Mus musculus OX=10090 GN=Prkag1 PE=1 SV=2	27	8	8	8	330	37.5	7.14	18.99	99.1	99.2	102.9	98.9	97	102.9	1.00803	0.727699	19082
P47811	Mapk14	Mitogen-activated protein kinase 14 OS=Mus musculus OX=10090 GN=Mapk14 PE=1 SV=3	21	7	9	7	360	41.3	5.88	17.22	113.6	108.3	109.2	86.9	90.3	91.8	1.23086	0.000694845	26416
Q6PHN9	Rab35	Ras-related protein Rab-35 OS=Mus musculus OX=10090 GN=Rab35 PE=1 SV=1	28	6	13	4	201	23	8.29	16.34	97.8	101.2	96.3	98.6	106.6	99.6	0.968832	0.336833	77407
D3YU12	Nmral1	NmrA-like family domain-containing protein 1 OS=Mus musculus OX=10090 GN=Nmral1 PE=1 SV=1	29	9	9	9	299	33.1	6.8	15.43	115.9	113.9	117	83.6	83.9	85.7	1.36967	9.8616e-06	67824
P47857	Pfkm	ATP-dependent 6-phosphofructokinase, muscle type OS=Mus musculus OX=10090 GN=Pfkm PE=1 SV=3	15	11	11	7	780	85.2	8	22.59	94.2	89.8	92.4	114	98.2	111.3	0.854405	0.035775	18642
E9PZ92	Exoc5	Exocyst complex component 5 OS=Mus musculus OX=10090 GN=Exoc5 PE=1 SV=1	14	9	10	9	643	74.2	6.99	20.21	102.2	104.1	106.3	99.3	91.4	96.6	1.08806	0.031694	105504
P01898	H2-Q10	H-2 class I histocompatibility antigen, Q10 alpha chain OS=Mus musculus OX=10090 GN=H2-Q10 PE=1 SV=3	23	7	8	2	325	37.2	5.25	15.48	96.7	93.9	100.5	99	100.6	109.3	0.942376	0.186708	15007
P62301	Rps13	40S ribosomal protein S13 OS=Mus musculus OX=10090 GN=Rps13 PE=1 SV=2	47	7	13	7	151	17.2	10.54	23.35	105.4	107.4	106.1	90.2	99.9	91	1.13447	0.0163582	68052
Q9D5V6	Syap1	Synapse-associated protein 1 OS=Mus musculus OX=10090 GN=Syap1 PE=1 SV=1	24	6	7	6	365	41.3	4.54	12.34	102.2	105.9	104.5	96.8	93.2	97.4	1.08768	0.00777846	67043
P98197	Atp11a	Probable phospholipid-transporting ATPase IH OS=Mus musculus OX=10090 GN=Atp11a PE=1 SV=1	8	9	9	7	1187	135.4	6.48	21.65	118.2	118.7	121.1	79.1	77.8	85.1	1.47934	8.96779e-05	50770
Q922I7	Ptbp1	MCG13402, isoform CRA_c OS=Mus musculus OX=10090 GN=Ptbp1 PE=1 SV=1	14	7	15	3	555	59.3	9.16	23.92	104.9	108.5	109	98.3	89.6	89.6	1.1618	0.00920844	19205
Q8VEH8	Erlec1	Endoplasmic reticulum lectin 1 OS=Mus musculus OX=10090 GN=Erlec1 PE=1 SV=1	24	9	10	9	483	54.9	6.25	13.29	115.6	124	119.7	80.1	80.5	80.2	1.49211	8.35508e-05	66753
P60670	Nploc4	Nuclear protein localization protein 4 homolog OS=Mus musculus OX=10090 GN=Nploc4 PE=1 SV=3	20	10	12	10	608	68	6.46	11.2	102	106.6	108.4	98.6	86.7	97.7	1.12014	0.0568746	217365
Q8C0C7	Farsa	Phenylalanine--tRNA ligase alpha subunit OS=Mus musculus OX=10090 GN=Farsa PE=1 SV=1	12	7	8	7	508	57.6	8.28	18.53	94.8	98.5	102.5	91.4	107.2	105.6	0.972387	0.636982	66590
Q9D832	Dnajb4	DnaJ homolog subfamily B member 4 OS=Mus musculus OX=10090 GN=Dnajb4 PE=1 SV=1	25	8	10	8	337	37.8	8.59	18.16	88.5	84.6	86.8	111.8	114	114.4	0.763962	4.26715e-05	67035
Q99JB8	Pacsin3	Protein kinase C and casein kinase II substrate protein 3 OS=Mus musculus OX=10090 GN=Pacsin3 PE=1 SV=1	17	6	10	6	424	48.6	6.1	17.86	79.4	90.2	79.7	99.6	144.5	106.7	0.710661	0.0782785	80708
Q8K297	Colgalt1	Procollagen galactosyltransferase 1 OS=Mus musculus OX=10090 GN=Colgalt1 PE=1 SV=2	14	7	10	7	617	71	7.28	19.67	110.7	113.8	112.1	87.3	88.3	87.8	1.2779	1.31769e-05	234407
Q9D024	Ccdc47	Coiled-coil domain-containing protein 47 OS=Mus musculus OX=10090 GN=Ccdc47 PE=1 SV=2	18	8	11	8	483	55.8	4.84	14.82	100.2	94.8	102.2	103.6	93.5	105.6	0.98183	0.694974	67163
O35459	Ech1	Delta(3,5)-Delta(2,4)-dienoyl-CoA isomerase, mitochondrial OS=Mus musculus OX=10090 GN=Ech1 PE=1 SV=1	21	7	12	7	327	36.1	7.71	23.02	96.6	97.4	93.6	104.5	105.5	102.4	0.920615	0.00496349	51798
P49443	Ppm1a	Protein phosphatase 1A OS=Mus musculus OX=10090 GN=Ppm1a PE=1 SV=1	28	9	10	8	382	42.4	5.36	21.01	100.2	97.3	102	101.2	97.2	101.9	0.997336	0.900588	19042
Q99JZ4	Sar1a	GTP-binding protein SAR1a OS=Mus musculus OX=10090 GN=Sar1a PE=1 SV=1	34	7	12	3	198	22.4	6.68	17.59	108.1	109.3	107.1	92.7	93.3	89.6	1.17743	0.000240654	20224
Q9CR68	Uqcrfs1	Cytochrome b-c1 complex subunit Rieske, mitochondrial OS=Mus musculus OX=10090 GN=Uqcrfs1 PE=1 SV=1	39	8	16	8	274	29.3	8.7	20.32	92.5	98.2	95.2	102.6	105.3	106.2	0.91022	0.0088263	66694
P50518	Atp6v1e1	V-type proton ATPase subunit E 1 OS=Mus musculus OX=10090 GN=Atp6v1e1 PE=1 SV=2	28	6	10	6	226	26.1	8.43	15.61	120.6	118.5	121.7	76.3	81.7	81.1	1.50899	3.15237e-05	11973
Q3UE92	Xpnpep1	X-prolyl aminopeptidase (Aminopeptidase P) 1, soluble, isoform CRA_b OS=Mus musculus OX=10090 GN=Xpnpep1 PE=1 SV=1	12	8	12	8	666	74.5	5.83	19.83	102	106.3	101.6	94.7	103	92.4	1.06825	0.136816	170750
Q8C878	Uba3	NEDD8-activating enzyme E1 catalytic subunit OS=Mus musculus OX=10090 GN=Uba3 PE=1 SV=2	21	8	11	8	462	51.7	5.45	17.4	100.6	104.5	101.4	96.9	93.9	102.6	1.04465	0.195799	22200
O35864	Cops5	COP9 signalosome complex subunit 5 OS=Mus musculus OX=10090 GN=Cops5 PE=1 SV=3	18	5	11	5	334	37.5	6.54	18.02	101.7	99.9	102.6	100.8	95.8	99.2	1.0284	0.169777	26754
Q3TZZ7	Esyt2	Extended synaptotagmin-2 OS=Mus musculus OX=10090 GN=Esyt2 PE=1 SV=1	10	7	9	7	845	94.1	7.75	20.03	96.9	102.1	98.7	104.7	96.3	101.3	0.984783	0.622261	52635
Q8R1F6	Hid1	Protein HID1 OS=Mus musculus OX=10090 GN=Hid1 PE=1 SV=1	9	7	9	7	788	88.7	5.94	15.9	104.8	111.4	105.9	88.5	95.2	94.2	1.15905	0.00724685	217310
Q9DCE9	Igtp	Interferon gamma-induced GTPase OS=Mus musculus OX=10090 GN=Igtp PE=1 SV=1	17	9	10	8	423	48.5	7.77	14.39	132.7	136.4	128.1	65.1	71.8	65.9	1.95858	3.50188e-05	16145
H3BK48	Mia2	Melanoma inhibitory activity protein 2 OS=Mus musculus OX=10090 GN=Mia2 PE=1 SV=1	15	10	10	10	785	88.2	5.05	14.03	99.6	94.5	93.2	100.3	106.6	105.9	0.918478	0.0381901	338320
Q8K019	Bclaf1	Bcl-2-associated transcription factor 1 OS=Mus musculus OX=10090 GN=Bclaf1 PE=1 SV=2	11	9	10	9	919	105.9	9.99	18.36	103.2	104.7	100.9	90.7	109	91.5	1.06044	0.388703	72567
Q9D287	Bcas2	Pre-mRNA-splicing factor SPF27 OS=Mus musculus OX=10090 GN=Bcas2 PE=1 SV=1	26	6	8	6	225	26.1	5.66	15.56	115.1	111.2	117.8	84.6	85.9	85.4	1.34467	0.000113424	68183
P70695	Fbp2	Fructose-1,6-bisphosphatase isozyme 2 OS=Mus musculus OX=10090 GN=Fbp2 PE=1 SV=2	19	5	11	5	339	36.9	6.16	21.54	107.4	105.1	110.5	90.5	89	97.5	1.16606	0.00735627	14120
Q62000	Ogn	Mimecan OS=Mus musculus OX=10090 GN=Ogn PE=1 SV=1	17	6	17	6	298	34	5.74	29.08	84.9	84.6	84	112.7	117	116.8	0.731602	2.64862e-05	18295
O70503	Hsd17b12	Very-long-chain 3-oxoacyl-CoA reductase OS=Mus musculus OX=10090 GN=Hsd17b12 PE=1 SV=1	29	8	9	8	312	34.7	9.52	20.45	106	102.9	107	94.4	94.5	95.2	1.11193	0.00109164	56348
Q60928	Ggt1	Glutathione hydrolase 1 proenzyme OS=Mus musculus OX=10090 GN=Ggt1 PE=1 SV=1	19	9	9	9	568	61.5	7.15	14.61	49.3	48.8	48.8	151.8	147.3	154	0.324211	8.45502e-07	14598
P28293	Ctsg	Cathepsin G OS=Mus musculus OX=10090 GN=Ctsg PE=1 SV=2	34	9	10	9	261	29.1	10.56	16.44	78.9	75.6	79.5	116.4	113.8	135.9	0.63917	0.00339964	13035
Q9ES28	Arhgef7	Rho guanine nucleotide exchange factor 7 OS=Mus musculus OX=10090 GN=Arhgef7 PE=1 SV=2	14	11	11	10	862	97	6.8	12.39	102	96.8	99.3	100.4	104.3	97.2	0.987413	0.644606	54126
G3X8T3	Ctsa	Carboxypeptidase OS=Mus musculus OX=10090 GN=Ctsa PE=1 SV=1	11	4	8	4	492	55.7	5.87	16.59	102.7	104.5	102.5	88.8	113.5	88	1.06683	0.484044	19025
Q9DBP0	Slc34a2	Sodium-dependent phosphate transport protein 2B OS=Mus musculus OX=10090 GN=Slc34a2 PE=1 SV=1	9	7	10	7	697	76.2	7.68	18.37	105.5	103.8	109.4	91.5	96.3	93.5	1.13295	0.00450882	20531
Q9D1K2	Atp6v1f	V-type proton ATPase subunit F OS=Mus musculus OX=10090 GN=Atp6v1f PE=1 SV=2	40	6	10	6	119	13.4	5.82	20.01	93.4	121.3	151.7	69.1	72.9	91.7	1.56782	0.0722312	66144
Q9CQ52	Cela3b	Chymotrypsin-like elastase family member 3B OS=Mus musculus OX=10090 GN=Cela3b PE=1 SV=1	23	4	12	4	269	28.9	5.87	12.21	68.1	66.6	66.5	143.2	115.9	139.6	0.50464	0.00155047	67868
Q9CZ19	Myl4	Myosin light chain 4 OS=Mus musculus OX=10090 GN=Myl4 PE=1 SV=1	46	6	11	5	193	21.2	5.03	18.89	75.7	81.8	72.7	129	116.6	124.2	0.622499	0.000491149	17896
E9Q411	Nbas	Neuroblastoma-amplified sequence OS=Mus musculus OX=10090 GN=Nbas PE=1 SV=1	4	9	11	9	2356	265.6	5.95	12.42	109.9	106.6	105	97.2	88.5	92.7	1.15481	0.00770833	71169
Q8K0C5	Zg16	Zymogen granule membrane protein 16 OS=Mus musculus OX=10090 GN=Zg16 PE=1 SV=1	32	4	8	4	167	18.2	9.23	15.67	46	46.2	49.4	164.8	134.2	159.3	0.308968	0.000370422	69036
Q60997	Dmbt1	Deleted in malignant brain tumors 1 protein OS=Mus musculus OX=10090 GN=Dmbt1 PE=1 SV=2	7	8	8	8	2085	226.7	4.97	12.47	21.6	42.4	27.8	170.2	179.4	158.7	0.180602	8.59154e-05	12945
P41105	Rpl28	60S ribosomal protein L28 OS=Mus musculus OX=10090 GN=Rpl28 PE=1 SV=2	34	6	9	6	137	15.7	12.02	23.78	105.6	98.7	104.8	100.8	90.3	99.8	1.06256	0.203284	19943
O35382	Exoc4	Exocyst complex component 4 OS=Mus musculus OX=10090 GN=Exoc4 PE=1 SV=2	11	10	10	10	975	110.5	6.49	14.38	102.1	105.4	106.5	96.6	94.8	94.7	1.09752	0.00310756	20336
Q8C052	Map1s	Microtubule-associated protein 1S OS=Mus musculus OX=10090 GN=Map1s PE=1 SV=2	11	9	9	9	973	102.9	7.02	17.57	103.8	104.7	101.3	96.8	101.9	91.6	1.06717	0.107426	270058
Q99JX4	Eif3m	Eukaryotic translation initiation factor 3 subunit M OS=Mus musculus OX=10090 GN=Eif3m PE=1 SV=1	18	6	10	6	374	42.5	5.74	14.93	113.1	110.4	114.3	84.3	90.9	87	1.28833	0.000353208	98221
Q3THK3	Gtf2f1	General transcription factor IIF subunit 1 OS=Mus musculus OX=10090 GN=Gtf2f1 PE=1 SV=2	21	8	10	8	508	57.2	7.01	12.94	114	114	111.9	88.1	83.9	88.2	1.3063	7.34062e-05	98053
Q11136	Pepd	Xaa-Pro dipeptidase OS=Mus musculus OX=10090 GN=Pepd PE=1 SV=3	13	6	8	6	493	55	5.78	14.43	109.5	113.9	111.3	91	85.5	88.8	1.26159	0.000348652	18624
Q6NXL1	Sec24d	Sec24-related gene family, member D (S. cerevisiae) OS=Mus musculus OX=10090 GN=Sec24d PE=1 SV=1	8	9	11	9	1032	112.6	7.18	16.82	113.2	113.7	110.2	88.1	85.9	88.9	1.28224	6.26897e-05	69608
E9PYB0	Ahnak2	AHNAK nucleoprotein 2 (Fragment) OS=Mus musculus OX=10090 GN=Ahnak2 PE=1 SV=8	17	6	10	2	1738	182.5	7.08	20.77	90.2	86.9	89.2	112.6	109.9	111.2	0.798022	5.63085e-05	100041194
F6QA74	Apex1	DNA-(apurinic or apyrimidinic site) lyase (Fragment) OS=Mus musculus OX=10090 GN=Apex1 PE=1 SV=1	20	4	7	4	289	32.3	8.57	16.87	103.8	102.7	104.4	98.9	95	95.1	1.07578	0.00607821	11792
A0A075B5N7	Igkv6-13	Immunoglobulin kappa variable 6-13 OS=Mus musculus OX=10090 GN=Igkv6-13 PE=1 SV=7	41	3	11	2	95	10.4	6.51	19.23	133.7	134.3	128	64.1	71.4	68.5	1.94118	2.56839e-05	-
P63028	Tpt1	Translationally-controlled tumor protein OS=Mus musculus OX=10090 GN=Tpt1 PE=1 SV=1	26	5	10	5	172	19.5	4.86	8.03	109.8	106.2	106.7	91	95.2	91.2	1.1633	0.00103981	22070
O54824	Il16	Pro-interleukin-16 OS=Mus musculus OX=10090 GN=Il16 PE=1 SV=3	6	7	11	7	1322	141.3	7.78	14.41	116.9	115.7	115.4	82.3	84.4	85.3	1.38095	5.68498e-06	16170
A0A1L1SQA8	Rps25	40S ribosomal protein S25 OS=Mus musculus OX=10090 GN=Rps25 PE=1 SV=1	32	4	9	4	93	10.3	9.99	25.22	108.9	101.4	105.2	96.2	91.3	97	1.10896	0.0211063	75617
Q9Z0H8	Clip2	CAP-Gly domain-containing linker protein 2 OS=Mus musculus OX=10090 GN=Clip2 PE=1 SV=2	11	10	10	5	1047	115.8	6.48	16.72	90.4	108.4	109.6	88	98.7	104.8	1.05798	0.516006	269713
O88958	Gnpda1	Glucosamine-6-phosphate isomerase 1 OS=Mus musculus OX=10090 GN=Gnpda1 PE=1 SV=3	31	7	10	5	289	32.5	6.6	9.73	113.8	122.1	130.7	82.3	68.4	82.7	1.57069	0.00280405	26384
P70372	Elavl1	ELAV-like protein 1 OS=Mus musculus OX=10090 GN=Elavl1 PE=1 SV=2	17	5	9	5	326	36.1	9.04	14.5	103.7	100.2	110.7	93.1	98.8	93.5	1.10231	0.0535511	15568
Q52KC3	Mcm5	DNA helicase OS=Mus musculus OX=10090 GN=Mcm5 PE=1 SV=1	12	7	8	7	734	82.4	8.29	12.16	117.8	117.7	119.9	81.8	82.6	80.2	1.45298	3.28763e-06	17218
Q80UP5	Ankrd13a	Ankyrin repeat domain-containing protein 13A OS=Mus musculus OX=10090 GN=Ankrd13a PE=1 SV=2	13	6	7	6	588	67.1	5.08	18.48	111	106.9	105	92.6	92.3	92.2	1.16528	0.00100312	68420
P70206	Plxna1	Plexin-A1 OS=Mus musculus OX=10090 GN=Plxna1 PE=1 SV=1	5	9	9	7	1894	211	6.9	15.87	96.3	99.3	99.3	101.1	103.3	100.7	0.966568	0.0573265	18844
Q9JK83	Pard6b	Partitioning defective 6 homolog beta OS=Mus musculus OX=10090 GN=Pard6b PE=1 SV=2	18	6	7	6	371	41	5.59	13.1	86.3	82.9	83.6	119	112.8	115.4	0.728111	0.000110235	58220
Q9CQW1	Ykt6	Synaptobrevin homolog YKT6 OS=Mus musculus OX=10090 GN=Ykt6 PE=1 SV=1	41	6	9	6	198	22.3	6.35	13.24	105.6	106.5	107.9	91.9	92.5	95.5	1.14327	0.000503295	56418
A2AJ72	Fubp3	Far upstream element (FUSE)-binding protein 3 OS=Mus musculus OX=10090 GN=Fubp3 PE=1 SV=1	19	9	9	7	569	61.4	8.28	17.08	89.1	95.3	92	105.1	111.2	107.2	0.854405	0.00343837	320267
Q91X52	Dcxr	L-xylulose reductase OS=Mus musculus OX=10090 GN=Dcxr PE=1 SV=2	26	6	17	5	244	25.7	7.31	39.66	107	106.4	106.3	90.6	99.7	89.9	1.14097	0.0141297	67880
Q9ESP1	Sdf2l1	Stromal cell-derived factor 2-like protein 1 OS=Mus musculus OX=10090 GN=Sdf2l1 PE=1 SV=2	24	4	7	4	221	23.6	7.42	19.34	126.2	130.8	122.1	72.3	77.1	71.5	1.71616	6.665e-05	64136
Q9DBX6	Cyp2s1	Cytochrome P450 2S1 OS=Mus musculus OX=10090 GN=Cyp2s1 PE=1 SV=1	17	9	13	9	501	55.6	8.78	21.41	88	91.9	87.4	113.1	107.1	112.6	0.803185	0.000789381	74134
Q8K1X4	Nckap1l	Nck-associated protein 1-like OS=Mus musculus OX=10090 GN=Nckap1l PE=1 SV=1	9	10	10	10	1134	128.8	6.64	14.81	131.6	123.1	132	72	67.4	74	1.81209	7.88019e-05	105855
Q80U93	Nup214	Nuclear pore complex protein Nup214 OS=Mus musculus OX=10090 GN=Nup214 PE=1 SV=2	5	9	13	9	2085	212.8	7.08	12.44	99.4	103.1	106.7	95.8	93.1	102	1.06291	0.144871	227720
Q8R180	Ero1a	ERO1-like protein alpha OS=Mus musculus OX=10090 GN=Ero1a PE=1 SV=2	21	7	10	7	464	54.1	6.54	11.25	114.5	115.6	112.7	78.7	91.5	87	1.33281	0.00175655	50527
Q9WTK5	Nfkb2	Nuclear factor NF-kappa-B p100 subunit OS=Mus musculus OX=10090 GN=Nfkb2 PE=1 SV=1	12	9	9	9	899	96.8	6.37	13.27	112	117.3	113.2	86.3	88	83.2	1.3301	0.000185584	18034
O55106	Strn	Striatin OS=Mus musculus OX=10090 GN=Strn PE=1 SV=2	13	8	9	7	780	85.9	5.27	17	107.7	102.6	108.2	94.1	98.7	88.7	1.13144	0.022186	268980
Q9CXZ1	Ndufs4	NADH dehydrogenase [ubiquinone] iron-sulfur protein 4, mitochondrial OS=Mus musculus OX=10090 GN=Ndufs4 PE=1 SV=3	31	5	9	5	175	19.8	9.99	20.35	106	99.6	104.5	97.2	95	97.7	1.06968	0.0328408	17993
P32883	Kras	GTPase KRas OS=Mus musculus OX=10090 GN=Kras PE=1 SV=1	29	5	12	3	189	21.6	6.77	23.97	92	93.5	94.9	106.4	108	105.1	0.877621	0.000388483	16653
O88696	Clpp	ATP-dependent Clp protease proteolytic subunit, mitochondrial OS=Mus musculus OX=10090 GN=Clpp PE=1 SV=1	32	7	12	7	272	29.8	7.47	16.9	100	103	100.1	106.9	95.9	94.1	1.02088	0.642267	53895
P42232	Stat5b	Signal transducer and activator of transcription 5B OS=Mus musculus OX=10090 GN=Stat5b PE=1 SV=1	13	11	12	3	786	89.9	6.05	14.65	108.6	106	104.6	91.5	96.8	92.4	1.13716	0.00310843	20851
P11531	Dmd	Dystrophin OS=Mus musculus OX=10090 GN=Dmd PE=1 SV=3	3	11	11	10	3678	425.6	5.94	17.41	80.9	87	88.2	113.4	111.1	119.3	0.74491	0.000925578	13405
A0A0R4J0T8	Arfgap3	ADP-ribosylation factor GTPase-activating protein 3 OS=Mus musculus OX=10090 GN=Arfgap3 PE=1 SV=1	18	9	11	9	524	57.5	8.47	20.32	93	91.3	90.2	114.3	103.5	107.7	0.843318	0.00635966	66251
Q8R5H1	Usp15	Ubiquitin carboxyl-terminal hydrolase 15 OS=Mus musculus OX=10090 GN=Usp15 PE=1 SV=1	11	10	13	9	981	112.3	5.17	13.21	112	109.6	110.1	87.6	88.7	92.1	1.23584	0.000164006	14479
A0A0R4J0Q6	Trim56	E3 ubiquitin-protein ligase TRIM56 OS=Mus musculus OX=10090 GN=Trim56 PE=1 SV=1	15	9	10	9	734	79.5	7.88	11.39	97	104.7	99.4	99.2	98.2	101.7	1.00669	0.803028	384309
A2RT67	Dennd3	DENN domain-containing protein 3 OS=Mus musculus OX=10090 GN=Dennd3 PE=1 SV=2	8	10	11	10	1274	143.8	7.53	11.54	99.6	93.7	90.1	105.6	108.8	102.3	0.894853	0.0294223	105841
A0A0R4J2B2	Kctd12	BTB/POZ domain-containing protein KCTD12 OS=Mus musculus OX=10090 GN=Kctd12 PE=1 SV=1	31	6	10	6	327	35.9	5.81	15.69	99.2	106.5	104.9	90.7	98.8	99.9	1.07326	0.124937	239217
Q9JKS4	Ldb3	LIM domain-binding protein 3 OS=Mus musculus OX=10090 GN=Ldb3 PE=1 SV=1	12	6	7	6	723	76.4	7.75	12.41	75.4	80	74.2	125.7	124.5	120.1	0.620038	4.4166e-05	24131
A2CG35	Rab12	Ras-related protein Rab-12 OS=Mus musculus OX=10090 GN=Rab12 PE=1 SV=1	25	8	10	7	291	32.2	8.84	22	90.3	90.2	89.8	113.3	103	113.5	0.819588	0.00463778	19328
Q8BGZ7	Krt75	Keratin, type II cytoskeletal 75 OS=Mus musculus OX=10090 GN=Krt75 PE=1 SV=1	9	8	15	1	551	59.7	8.31	27.04	111.7	94.1	98.1	98.1	109.4	88.6	1.02634	0.762386	109052
Q9Z2M7	Pmm2	Phosphomannomutase 2 OS=Mus musculus OX=10090 GN=Pmm2 PE=1 SV=1	27	6	9	6	242	27.6	6.42	17.85	104.7	105.8	100.2	100.1	93.9	95.3	1.07397	0.0484739	54128
A0A087WNZ7	Trip12	E3 ubiquitin-protein ligase TRIP12 OS=Mus musculus OX=10090 GN=Trip12 PE=1 SV=1	5	9	11	9	1992	220.5	8.44	11.46	106.7	111.4	107.3	89.8	93.4	91.4	1.185	0.000722472	14897
O54890	Itgb3	Integrin beta-3 OS=Mus musculus OX=10090 GN=Itgb3 PE=1 SV=2	13	10	13	10	787	86.7	5.24	16.83	79.7	84.9	80.6	119.9	115.3	119.6	0.691094	7.52229e-05	16416
G5E8M7	Gstm6	Glutathione S-transferase Mu 6 OS=Mus musculus OX=10090 GN=Gstm6 PE=1 SV=1	16	4	10	1	232	27.3	5.91	20.32							#DIV/0!	#DIV/0!	14867
E9PV45	Usp24	Ubiquitin carboxyl-terminal hydrolase 24 OS=Mus musculus OX=10090 GN=Usp24 PE=1 SV=1	4	9	9	9	2618	293.9	6.21	12.59	101.9	100.3	103.2	101.7	101.1	91.8	1.03666	0.338249	329908
Q9D8V0	Hm13	Minor histocompatibility antigen H13 OS=Mus musculus OX=10090 GN=Hm13 PE=1 SV=1	14	5	9	5	378	41.7	6.04	15.63	113.8	115	111.1	88.3	80.6	91.1	1.30731	0.00134695	-
P99027	Rplp2	60S acidic ribosomal protein P2 OS=Mus musculus OX=10090 GN=Rplp2 PE=1 SV=3	39	2	8	2	115	11.6	4.54	19.71	105.6	96.9	99.2	98	102.4	97.9	1.0114	0.724434	67186
Q9DBE0	Csad	Cysteine sulfinic acid decarboxylase OS=Mus musculus OX=10090 GN=Csad PE=1 SV=1	14	7	9	7	493	55.1	6.61	17.39	87.1	85.3	92.1	113.5	110	112.1	0.788141	0.000478973	246277
Q9D7N9	Apmap	Adipocyte plasma membrane-associated protein OS=Mus musculus OX=10090 GN=Apmap PE=1 SV=1	18	8	11	8	415	46.4	6.32	14.75	108.9	106.1	102	92.9	92.9	97.2	1.12014	0.0100273	71881
A0A0R4J0D3	Stt3b	Dolichyl-diphosphooligosaccharide--protein glycosyltransferase subunit STT3B OS=Mus musculus OX=10090 GN=Stt3b PE=1 SV=1	9	7	12	7	823	93.3	9	20.32	110.2	105.1	109	94.2	89.8	91.7	1.17628	0.00125876	68292
Q6NZR5	Skiv2l	Superkiller viralicidic activity 2-like (S. cerevisiae) OS=Mus musculus OX=10090 GN=Skiv2l PE=1 SV=1	7	8	9	7	1244	137.4	6.28	13.48	100.6	103.2	103	95.8	97.1	100.2	1.04674	0.0420911	108077
Q60631	Grb2	Growth factor receptor-bound protein 2 OS=Mus musculus OX=10090 GN=Grb2 PE=1 SV=1	33	7	9	7	217	25.2	6.32	23.93	112.9	112.3	110.5	88.1	89	87.2	1.27015	1.1563e-05	14784
P01921	H2-Ab1	H-2 class II histocompatibility antigen, A-D beta chain OS=Mus musculus OX=10090 GN=H2-Ab1 PE=1 SV=1	23	6	11	6	265	29.9	7.83	28.7	120.3	118.7	120.9	77.3	84.5	78.4	1.49833	6.86286e-05	14961
Q9DB27	Mcts1	Malignant T-cell-amplified sequence 1 OS=Mus musculus OX=10090 GN=Mcts1 PE=1 SV=1	37	5	8	5	181	20.5	8.82	11.31	97.7	94.6	94.1	105.3	102.6	105.7	0.913265	0.00367333	68995
Q61024	Asns	Asparagine synthetase [glutamine-hydrolyzing] OS=Mus musculus OX=10090 GN=Asns PE=1 SV=3	16	9	12	9	561	64.2	6.58	11.85	72.8	71.9	72.4	126.9	129	127	0.566989	1.84247e-07	27053
P49138	Mapkapk2	MAP kinase-activated protein kinase 2 OS=Mus musculus OX=10090 GN=Mapkapk2 PE=1 SV=2	18	8	10	5	386	44	8.57	19.95	117	116	120	82.4	81.7	82.9	1.42915	9.35681e-06	17164
G3X9U9	Fis1	Mitochondrial fission 1 protein OS=Mus musculus OX=10090 GN=Fis1 PE=1 SV=1	26	4	8	4	145	16.3	9.25	10.58	118.7	114.9	116.9	87.2	79.1	83.2	1.40481	0.000200003	66437
Q9CX56	Psmd8	26S proteasome non-ATPase regulatory subunit 8 OS=Mus musculus OX=10090 GN=Psmd8 PE=1 SV=2	16	6	7	6	353	39.9	9.58	22.51	102.4	105	106	94	89.7	102.8	1.09389	0.0885575	57296
Q920E5	Fdps	Farnesyl pyrophosphate synthase OS=Mus musculus OX=10090 GN=Fdps PE=1 SV=1	18	6	10	6	353	40.6	5.66	17.73	100.8	98	95.7	103.3	94.7	107.4	0.964309	0.417434	110196
Q9Z0Y1	Dctn3	Dynactin subunit 3 OS=Mus musculus OX=10090 GN=Dctn3 PE=1 SV=2	33	6	7	6	186	21	6.06	20.94	98.5	97.5	98	104	98.6	103.4	0.960784	0.082202	53598
A2ARA8	Itga8	Integrin alpha-8 OS=Mus musculus OX=10090 GN=Itga8 PE=1 SV=1	7	8	14	7	1062	117.5	6.16	27.9	84	84.9	86.3	118.3	108.4	118.1	0.740139	0.000860048	241226
Q9DCV4	Rmdn1	Regulator of microtubule dynamics protein 1 OS=Mus musculus OX=10090 GN=Rmdn1 PE=1 SV=2	21	6	9	5	305	35	8.7	13.06	102	100.5	104.8	101	95.8	95.9	1.04988	0.0843056	66302
O08759	Ube3a	Ubiquitin-protein ligase E3A OS=Mus musculus OX=10090 GN=Ube3a PE=1 SV=2	10	8	9	8	870	99.8	5.08	14.76	104.6	101.3	108.2	95.5	92.4	97.9	1.09902	0.0208574	22215
P35505	Fah	Fumarylacetoacetase OS=Mus musculus OX=10090 GN=Fah PE=1 SV=2	18	6	7	6	419	46.1	7.18	13.4	91.2	88.4	93.2	108.7	109.2	109.4	0.833486	0.000207819	14085
Q61687	Atrx	Transcriptional regulator ATRX OS=Mus musculus OX=10090 GN=Atrx PE=1 SV=3	5	12	12	12	2476	278.4	6.68	16.26	107.1	108.2	105.6	89.7	90	99.4	1.14977	0.0130767	22589
P11438	Lamp1	Lysosome-associated membrane glycoprotein 1 OS=Mus musculus OX=10090 GN=Lamp1 PE=1 SV=2	14	5	10	5	406	43.8	8.4	16.62	114.1	111.4	112.2	87.5	86	89	1.28648	2.89805e-05	16783
Q9JHU9	Isyna1	Inositol-3-phosphate synthase 1 OS=Mus musculus OX=10090 GN=Isyna1 PE=1 SV=1	15	7	10	7	557	60.9	6.42	17.08	118.4	114.7	120.3	81.6	83.7	81.3	1.43309	3.93451e-05	71780
P30275	Ckmt1	Creatine kinase U-type, mitochondrial OS=Mus musculus OX=10090 GN=Ckmt1 PE=1 SV=1	22	9	10	7	418	47	8.16	20.52	122.7	128.7	129.7	72.8	74.3	71.7	1.74177	1.97733e-05	12716
Q91Y97	Aldob	Fructose-bisphosphate aldolase B OS=Mus musculus OX=10090 GN=Aldob PE=1 SV=3	18	4	5	4	364	39.5	8.27	14.73	72.8	84.1	76.7	122.4	116.5	127.4	0.637729	0.000638723	230163
A0A2R8VK76	Cpsf1	Cleavage and polyadenylation-specificity factor subunit 1 OS=Mus musculus OX=10090 GN=Cpsf1 PE=1 SV=1	8	11	11	11	1450	161.7	6.58	13.48	106.2	109.9	110.1	91.4	93.7	88.7	1.19138	0.000813558	94230
Q9CQ60	Pgls	6-phosphogluconolactonase OS=Mus musculus OX=10090 GN=Pgls PE=1 SV=1	25	5	8	5	257	27.2	5.85	13.56	105	105.9	105.5	90.2	100	93.3	1.11605	0.0194884	66171
Q80YR5	Safb2	Scaffold attachment factor B2 OS=Mus musculus OX=10090 GN=Safb2 PE=1 SV=2	13	8	9	4	991	111.8	6.38	13.64	105.7	110.6	107.3	90.2	92.5	93.7	1.17077	0.000886512	224902
P84244	H3f3a	Histone H3.3 OS=Mus musculus OX=10090 GN=H3f3a PE=1 SV=2	36	8	42	2	136	15.3	11.27	76.22	102.7	99.8	99.8	97.5	102	98.2	1.01545	0.417997	15078
A2A5V2	Sh3bp1	SH3 domain-binding protein 1 OS=Mus musculus OX=10090 GN=Sh3bp1 PE=1 SV=1	20	9	11	9	584	64.7	5.67	14	89.6	100.2	98.7	101.1	90.3	120.1	0.926164	0.456887	20401
O35405	Pld3	Phospholipase D3 OS=Mus musculus OX=10090 GN=Pld3 PE=1 SV=1	13	6	10	6	488	54.4	6.52	20.22	117.1	120.7	113.7	79.8	90.3	78.5	1.41392	0.00127719	18807
Q9WTP6	Ak2	Adenylate kinase 2, mitochondrial OS=Mus musculus OX=10090 GN=Ak2 PE=1 SV=5	24	6	10	6	239	26.5	7.39	15.78	100.8	110.3	111	88.2	101.4	88.3	1.15905	0.0547527	11637
P12787	Cox5a	Cytochrome c oxidase subunit 5A, mitochondrial OS=Mus musculus OX=10090 GN=Cox5a PE=1 SV=2	28	5	11	5	146	16.1	6.54	16.96	106.6	104.7	106.2	93.6	95.1	93.9	1.1235	9.45547e-05	12858
A0A1W2P845	Csrp2	Cysteine and glycine-rich protein 2 OS=Mus musculus OX=10090 GN=Csrp2 PE=1 SV=1	37	7	9	7	197	21.6	8.78	12.41	96.6	93.9	94.6	105.3	103	106.6	0.905367	0.00170559	13008
P07309	Ttr	Transthyretin OS=Mus musculus OX=10090 GN=Ttr PE=1 SV=1	31	5	11	5	147	15.8	6.16	22.3	106.2	108.2	105.3	90.3	100.6	89.4	1.14056	0.0236759	22139
Q6Y685	Tacc1	Transforming acidic coiled-coil-containing protein 1 OS=Mus musculus OX=10090 GN=Tacc1 PE=1 SV=1	9	8	10	8	774	83.9	5.03	19.82	101.1	94.9	99.5	103.2	98.4	102.8	0.970762	0.286106	320165
F6ZS70	Mark2	Non-specific serine/threonine protein kinase (Fragment) OS=Mus musculus OX=10090 GN=Mark2 PE=1 SV=1	9	7	9	4	776	86.5	9.72	15.42	95.5	98.3	103.3	104.9	96.9	101.2	0.980528	0.577492	13728
Q99K23	Ufsp2	Ufm1-specific protease 2 OS=Mus musculus OX=10090 GN=Ufsp2 PE=1 SV=1	18	8	11	8	461	52.5	6.76	15.1	100	101.6	105.9	95	99.3	98.1	1.05164	0.0819599	192169
E9QK41	Ablim1	Actin-binding LIM protein 1 OS=Mus musculus OX=10090 GN=Ablim1 PE=1 SV=1	10	7	9	7	861	96.8	8.63	13.79	94.3	95.7	98	101.2	103.6	107.2	0.923077	0.017511	226251
A0A140LJJ5	Akap13	A-kinase anchor protein 13 OS=Mus musculus OX=10090 GN=Akap13 PE=1 SV=1	4	10	11	10	2794	305.8	5.35	9.15	98.8	105.3	102.4	94.9	101	97.5	1.04465	0.165839	75547
Q9JLV1	Bag3	BAG family molecular chaperone regulator 3 OS=Mus musculus OX=10090 GN=Bag3 PE=1 SV=2	23	9	11	9	577	61.8	7.27	6.14	88.7	91.4	91.2	109.7	112.2	106.9	0.825122	0.00040368	29810
Q9QUR8	Sema7a	Semaphorin-7A OS=Mus musculus OX=10090 GN=Sema7a PE=1 SV=1	13	8	11	8	664	74.9	7.74	16.65	93	101.5	93	103.3	108.7	100.6	0.919706	0.0866211	20361
Q9QUH0	Glrx	Glutaredoxin-1 OS=Mus musculus OX=10090 GN=Glrx PE=1 SV=3	37	4	9	4	107	11.9	8.37	16.92	140.5	129.9	135.4	69.2	63.1	61.8	2.09067	5.03864e-05	93692
O35593	Psmd14	26S proteasome non-ATPase regulatory subunit 14 OS=Mus musculus OX=10090 GN=Psmd14 PE=1 SV=2	20	7	11	7	310	34.6	6.52	25.81	109.4	109.8	107.7	94	89.5	89.6	1.197	0.000376225	59029
Q9CQF3	Nudt21	Cleavage and polyadenylation specificity factor subunit 5 OS=Mus musculus OX=10090 GN=Nudt21 PE=1 SV=1	32	7	9	7	227	26.2	8.82	9.54	107.3	112	107	93.3	86.7	93.7	1.19218	0.00326522	68219
Q68FF6	Git1	ARF GTPase-activating protein GIT1 OS=Mus musculus OX=10090 GN=Git1 PE=1 SV=1	11	8	10	7	770	85.2	6.93	14.74	96.5	100.3	96.6	101.8	105.8	99	0.956947	0.132728	216963
B1ASP2	Jak1	Tyrosine-protein kinase OS=Mus musculus OX=10090 GN=Jak1 PE=1 SV=1	8	9	10	9	1153	133.3	7.53	14.32	100.2	101.4	102.7	98.6	101.6	95.5	1.02908	0.206476	16451
Q91WN1	Dnajc9	DnaJ homolog subfamily C member 9 OS=Mus musculus OX=10090 GN=Dnajc9 PE=1 SV=2	24	7	10	7	259	30	5.94	13.83	113.1	113.5	109.3	84.2	93.1	86.9	1.27139	0.00126998	108671
P01592	Jchain	Immunoglobulin J chain OS=Mus musculus OX=10090 GN=Jchain PE=1 SV=4	35	5	11	5	159	18	4.89	27.29	137.6	129	136.2	67	64.6	65.5	2.04363	1.54621e-05	16069
D3YXF5	C7	Complement component 7 OS=Mus musculus OX=10090 GN=C7 PE=1 SV=2	10	7	9	7	845	93.3	6.38	18.74	93.1	90.9	89.4	110.6	109	106.9	0.837366	0.000308724	109828
Q9ERI2	Rab27a	Ras-related protein Rab-27A OS=Mus musculus OX=10090 GN=Rab27a PE=1 SV=1	24	5	9	5	221	25	5.36	20.36	128.5	123.2	128.2	72.7	67.1	80.2	1.72682	0.000215098	11891
Q9CX86	Hnrnpa0	Heterogeneous nuclear ribonucleoprotein A0 OS=Mus musculus OX=10090 GN=Hnrnpa0 PE=1 SV=1	23	7	11	6	305	30.5	9.31	14.71	94.3	94.7	93.9	98.8	116	102.4	0.891866	0.0946526	77134
Q8CBM2	Asph	Aspartyl/asparaginyl beta-hydroxylase OS=Mus musculus OX=10090 GN=Asph PE=1 SV=1	15	9	14	9	658	75.1	4.91	13.99	106.3	105	105.3	93.1	96	94.2	1.11754	0.000284866	65973
Q9DBB9	Cpn2	Carboxypeptidase N subunit 2 OS=Mus musculus OX=10090 GN=Cpn2 PE=1 SV=2	9	4	8	4	547	60.4	5.88	20.82	83.9	83.4	81.6	121.6	111	118.5	0.708915	0.000453406	71756
A2AWA9	Rabgap1	Rab GTPase-activating protein 1 OS=Mus musculus OX=10090 GN=Rabgap1 PE=1 SV=1	11	9	11	8	1064	120.7	5.25	10.28	93.7	94.3	95.8	109.2	99	107.9	0.897817	0.0300192	227800
A0A2I3BQZ9	App	Amyloid-beta A4 protein OS=Mus musculus OX=10090 GN=App PE=1 SV=1	12	8	12	8	751	84.6	4.79	21.97	96.1	93.8	92.3	106.8	108.2	102.8	0.88798	0.00375119	11820
E9Q8F0	Rbm39	RNA-binding protein 39 OS=Mus musculus OX=10090 GN=Rbm39 PE=1 SV=1	15	5	7	5	415	47	10.52	9.74	94.3	96.5	93.6	104.5	98	113	0.901426	0.0793669	170791
Q6W4W7	Diaph2	DIA3 OS=Mus musculus OX=10090 GN=Diaph2 PE=1 SV=1	9	10	11	10	1102	125.3	6.77	14.31	104.9	103.6	99.1	96.6	103.7	92.1	1.05198	0.253962	54004
Q8C570	Rae1	mRNA export factor OS=Mus musculus OX=10090 GN=Rae1 PE=1 SV=1	20	5	7	5	368	40.9	7.83	11.25	105.6	106	97.3	100.4	96.6	94.2	1.06078	0.154072	66679
Q3TFD2	Lpcat1	Lysophosphatidylcholine acyltransferase 1 OS=Mus musculus OX=10090 GN=Lpcat1 PE=1 SV=1	20	8	13	8	534	59.7	6.34	14.12	102.3	102.8	101.1	94.9	101.2	97.7	1.04221	0.0941228	210992
Q8BSQ9	Pbrm1	Protein polybromo-1 OS=Mus musculus OX=10090 GN=Pbrm1 PE=1 SV=4	7	10	10	10	1634	187.1	6.9	11.21	104.6	104.6	107.9	87.3	97.4	98.1	1.12129	0.0353499	66923
Q8C166	Cpne1	Copine-1 OS=Mus musculus OX=10090 GN=Cpne1 PE=1 SV=1	12	7	9	6	536	58.8	5.66	21.25	96.5	94.4	97.2	105	98.7	108.1	0.92399	0.0522811	266692
Q91YR7	Prpf6	Pre-mRNA-processing factor 6 OS=Mus musculus OX=10090 GN=Prpf6 PE=1 SV=1	10	9	12	9	941	106.7	8.09	15.41	108.7	107.2	104.8	93.1	94.4	91.8	1.14823	0.000533185	68879
Q8BND5	Qsox1	Sulfhydryl oxidase 1 OS=Mus musculus OX=10090 GN=Qsox1 PE=1 SV=1	8	6	9	6	748	82.7	7.17	12.86	102.1	96.8	100.3	100.9	97.3	102.7	0.99435	0.81135	104009
A2AD84	Stk26	Serine/threonine-protein kinase 26 OS=Mus musculus OX=10090 GN=Stk26 PE=1 SV=1	18	6	8	2	392	43.9	5.34	19.58	112.2	107.6	113.7	90.5	89.2	86.9	1.25094	0.00045815	70415
Q8BUK6	Hook3	Protein Hook homolog 3 OS=Mus musculus OX=10090 GN=Hook3 PE=1 SV=2	17	11	12	11	718	83.2	5.19	9.94	101	103.3	102.8	99.6	94.4	98.9	1.04848	0.0557926	320191
Q61247	Serpinf2	Alpha-2-antiplasmin OS=Mus musculus OX=10090 GN=Serpinf2 PE=1 SV=1	16	8	10	8	491	54.9	6.3	14.63	84.2	80.3	82.9	121.1	116.3	115.2	0.701645	8.17534e-05	18816
Q68FL4	Ahcyl2	Putative adenosylhomocysteinase 3 OS=Mus musculus OX=10090 GN=Ahcyl2 PE=1 SV=1	13	8	11	8	613	66.9	7.36	15.41	107.5	111.8	110.7	88.5	90.3	91.2	1.22222	0.000189909	74340
P56812	Pdcd5	Programmed cell death protein 5 OS=Mus musculus OX=10090 GN=Pdcd5 PE=1 SV=3	53	6	10	6	126	14.3	5.68	15.95	100.8	103.6	104.5	96.5	98.8	95.8	1.06115	0.0144736	56330
P62918	Rpl8	60S ribosomal protein L8 OS=Mus musculus OX=10090 GN=Rpl8 PE=1 SV=2	36	8	16	8	257	28	11.03	30.59	105.9	100.2	101.4	96	94	102.6	1.05092	0.187106	26961
P49813	Tmod1	Tropomodulin-1 OS=Mus musculus OX=10090 GN=Tmod1 PE=1 SV=2	21	9	9	8	359	40.4	5.1	19.8	90.8	92.2	92	109.4	113.7	101.9	0.846154	0.00867652	21916
A2ADH1	Magt1	Magnesium transporter protein 1 OS=Mus musculus OX=10090 GN=Magt1 PE=1 SV=1	13	5	8	4	368	41.6	10.05	17.75	104.9	102.4	107.1	99.9	85.7	100.1	1.10046	0.125802	67075
Q9WVL0	Gstz1	Maleylacetoacetate isomerase OS=Mus musculus OX=10090 GN=Gstz1 PE=1 SV=1	22	4	7	4	216	24.3	7.85	18.99	92.2	92	95	114.2	100.8	105.8	0.870324	0.0262255	14874
Q9R1W5	Calcrl	Calcitonin gene-related peptide type 1 receptor OS=Mus musculus OX=10090 GN=Calcrl PE=1 SV=2	10	5	9	5	463	53.2	6.71	20.14	75.9	72	73.9	133.9	121.3	123	0.586462	0.000221357	54598
E9PX59	Samd9l	Sterile alpha motif domain-containing protein 9-like OS=Mus musculus OX=10090 GN=Samd9l PE=1 SV=1	5	7	8	7	1579	182.1	7.03	12.06	123.6	119.1	120.4	77.8	84.1	75	1.53271	0.000151021	209086
P70404	Idh3g	Isocitrate dehydrogenase [NAD] subunit gamma 1, mitochondrial OS=Mus musculus OX=10090 GN=Idh3g PE=1 SV=1	18	7	11	7	393	42.8	9.01	13.53	104.7	106.5	104.6	94.1	94.1	96	1.11119	0.000284713	15929
F6XC25	Cc2d1b	Coiled-coil and C2 domain-containing protein 1B (Fragment) OS=Mus musculus OX=10090 GN=Cc2d1b PE=1 SV=1	12	10	11	10	770	85	5.87	17.33	95.5	117.8	110.2	93.3	92	91.2	1.16998	0.0757271	319965
Q8VD65	Pik3r4	Phosphoinositide 3-kinase regulatory subunit 4 OS=Mus musculus OX=10090 GN=Pik3r4 PE=1 SV=3	7	8	8	8	1358	152.5	7.12	14.79	100.9	104.4	111.2	99.2	87.4	96.9	1.1164	0.0797858	75669
Q8VD04	Gripap1	GRIP1-associated protein 1 OS=Mus musculus OX=10090 GN=Gripap1 PE=1 SV=1	12	8	8	8	806	92.7	5.25	14.05	104.5	104.5	105.9	91.7	103.8	89.6	1.10452	0.0893711	54645
Q80U72	Scrib	Protein scribble homolog OS=Mus musculus OX=10090 GN=Scrib PE=1 SV=2	7	8	11	8	1612	174	5.12	11.45	93.2	98.2	93.4	103.7	101.2	110.4	0.903267	0.0335014	105782
Q9DCH4	Eif3f	Eukaryotic translation initiation factor 3 subunit F OS=Mus musculus OX=10090 GN=Eif3f PE=1 SV=2	22	6	7	6	361	38	5.58	17.91	104.4	107.1	114.5	100	79.5	94.5	1.18978	0.0641167	66085
Q8CGA0	Ppm1f	Protein phosphatase 1F OS=Mus musculus OX=10090 GN=Ppm1f PE=1 SV=1	20	6	8	6	452	49.6	5.3	15.64	89.9	86.1	91.4	116.6	106.3	109.7	0.803969	0.00312868	68606
P39655	Alox12	Arachidonate 12-lipoxygenase, 12S-type OS=Mus musculus OX=10090 GN=Alox12 PE=1 SV=4	13	7	10	7	663	75.3	6.19	17.71	83.7	87.3	83.3	113.8	116.5	115.5	0.735396	3.42043e-05	11684
P23591	Tsta3	GDP-L-fucose synthase OS=Mus musculus OX=10090 GN=Tsta3 PE=1 SV=3	17	4	7	4	321	35.9	6.74	14.26	107.2	101.7	104.4	93.4	97.5	95.9	1.0924	0.011267	-
P01901	H2-K1	H-2 class I histocompatibility antigen, K-B alpha chain OS=Mus musculus OX=10090 GN=H2-K1 PE=1 SV=1	18	6	13	1	369	41.3	6.39	17.59							#DIV/0!	#DIV/0!	14972
Q922W5	Pycr1	Pyrroline-5-carboxylate reductase 1, mitochondrial OS=Mus musculus OX=10090 GN=Pycr1 PE=1 SV=1	18	5	7	5	309	32.4	6.86	14.2	100.4	96.1	99.5	103	92.5	108.5	0.973684	0.613289	209027
Q8R151	Znfx1	NFX1-type zinc finger-containing protein 1 OS=Mus musculus OX=10090 GN=Znfx1 PE=1 SV=3	8	11	11	11	1909	218.7	7.47	7.09	104.9	105.9	104.9	93.7	98.4	92.2	1.11045	0.00526817	98999
Q8BP92	Rcn2	Reticulocalbin-2 OS=Mus musculus OX=10090 GN=Rcn2 PE=1 SV=1	26	7	11	7	320	37.2	4.42	13.13	95.3	95.9	101.1	105.7	99.5	102.5	0.949951	0.116273	26611
Q60872	Eif1a	Eukaryotic translation initiation factor 1A OS=Mus musculus OX=10090 GN=Eif1a PE=2 SV=3	38	7	10	1	144	16.5	5.24	19.45	103.4	100.7	98.3	97.7	101.7	98.4	1.01545	0.469511	13664
A2ADY9	Ddi2	Protein DDI1 homolog 2 OS=Mus musculus OX=10090 GN=Ddi2 PE=1 SV=1	17	5	8	5	399	44.6	5.05	15.67	91.7	96.5	96.7	105.9	98.9	110.3	0.904157	0.0529414	68817
Q61129	Cfi	Complement factor I OS=Mus musculus OX=10090 GN=Cfi PE=1 SV=3	18	10	15	10	603	67.2	7.46	25.46	84.3	81.4	87	115.2	114	118.1	0.727613	9.90525e-05	12630
A0A0R4J1N9	Tfam	Transcription factor A, mitochondrial OS=Mus musculus OX=10090 GN=Tfam PE=1 SV=1	29	7	9	7	199	23.4	9.72	19.67	101.3	97.4	100.1	98.4	102.7	100.1	0.992032	0.662626	21780
Q9CX00	Ist1	IST1 homolog OS=Mus musculus OX=10090 GN=Ist1 PE=1 SV=1	17	8	11	7	362	39.4	5.44	23.05	99.2	96.7	98.9	103	99.3	102.9	0.965924	0.0750892	71955
Q8BHB9	Clic6	Chloride intracellular channel protein 6 OS=Mus musculus OX=10090 GN=Clic6 PE=1 SV=1	8	3	6	2	596	62.8	4.32	20.48	91.8	87.2	92.4	108.3	121.9	98.3	0.82618	0.0537554	209195
Q8BWF0	Aldh5a1	Succinate-semialdehyde dehydrogenase, mitochondrial OS=Mus musculus OX=10090 GN=Aldh5a1 PE=1 SV=1	13	6	7	6	523	55.9	8.25	14.59	79.1	87.7	78.6	118.5	122.2	114	0.691852	0.000652928	214579
G3UW85	Erh	Enhancer of rudimentary homolog OS=Mus musculus OX=10090 GN=Erh PE=1 SV=1	28	3	8	3	123	14.3	5.54	19.73	114.4	106.7	111.1	91.5	84.5	91.8	1.24048	0.00277077	13877
Q8CBY8	Dctn4	Dynactin subunit 4 OS=Mus musculus OX=10090 GN=Dctn4 PE=1 SV=1	17	6	8	6	467	53	7.72	10.17	92.5	100.2	94.2	99.3	109.3	104.4	0.916613	0.0791266	67665
Q14BI5	Myom2	Myomesin 2 OS=Mus musculus OX=10090 GN=Myom2 PE=1 SV=1	7	9	10	9	1463	164.6	5.77	9.92	70.8	78.1	75.5	131.4	116.2	128	0.597444	0.000578174	17930
P02463	Col4a1	Collagen alpha-1(IV) chain OS=Mus musculus OX=10090 GN=Col4a1 PE=1 SV=4	4	6	10	4	1669	160.6	8.24	20.79	98.7	95.7	98.2	101.6	100.2	105.5	0.952164	0.0559804	12826
Q8C8U0	Ppfibp1	Liprin-beta-1 OS=Mus musculus OX=10090 GN=Ppfibp1 PE=1 SV=3	10	9	12	8	969	108.5	5.49	9.41	92.6	93.5	89.7	106.6	112.1	105.4	0.850972	0.00241328	67533
Q80YX1	Tnc	Tenascin OS=Mus musculus OX=10090 GN=Tnc PE=1 SV=1	6	9	9	9	2110	231.7	4.89	16.36	133.6	125.1	131.1	67.2	70.1	72.9	1.85442	3.77771e-05	21923
O09172	Gclm	Glutamate--cysteine ligase regulatory subunit OS=Mus musculus OX=10090 GN=Gclm PE=1 SV=1	24	5	6	5	274	30.5	5.52	14.97	90	91.4	90	107.9	117.9	102.8	0.825928	0.0128917	14630
Q8BU31	Rap2c	Ras-related protein Rap-2c OS=Mus musculus OX=10090 GN=Rap2c PE=1 SV=1	25	4	6	2	183	20.7	4.94	14.99	112.1	101.5	108	100.7	79.4	98.3	1.15517	0.123867	72065
Q9D358	Acp1	Low molecular weight phosphotyrosine protein phosphatase OS=Mus musculus OX=10090 GN=Acp1 PE=1 SV=3	28	4	8	1	158	18.2	6.74	22.64	91.4	87.8	92.7	109.3	109.7	109.1	0.828711	0.000222022	11431
Q9WUD1	Stub1	STIP1 homology and U box-containing protein 1 OS=Mus musculus OX=10090 GN=Stub1 PE=1 SV=1	26	8	11	8	304	34.9	6.01	16.65	94.5	102.5	96.3	104.3	102.6	99.8	0.956309	0.180322	56424
Q3TDD9	Ppp1r21	Protein phosphatase 1 regulatory subunit 21 OS=Mus musculus OX=10090 GN=Ppp1r21 PE=1 SV=2	11	8	9	8	780	88.3	6.9	15.55	96	102.7	100.3	98.7	101	101.3	0.993355	0.769407	73825
Q99KD5	Unc45a	Protein unc-45 homolog A OS=Mus musculus OX=10090 GN=Unc45a PE=1 SV=2	9	9	9	9	944	103.4	6.34	11.39	101.1	100.3	103.9	97.2	97.4	100	1.03632	0.0654113	101869
Q922U1	Prpf3	U4/U6 small nuclear ribonucleoprotein Prp3 OS=Mus musculus OX=10090 GN=Prpf3 PE=1 SV=1	13	8	10	8	683	77.4	9.5	13.21	96.3	100.3	98.4	98.5	109.2	97.2	0.96753	0.452952	70767
Q3TVI8	Pbxip1	Pre-B-cell leukemia transcription factor-interacting protein 1 OS=Mus musculus OX=10090 GN=Pbxip1 PE=1 SV=2	10	6	7	6	727	81.1	5.36	15.61	95.9	98.9	99.4	101.5	100.4	103.9	0.962067	0.0619261	229534
E9Q3I4	Itsn1	Intersectin-1 OS=Mus musculus OX=10090 GN=Itsn1 PE=1 SV=1	12	10	11	10	1176	133.1	7.88	12.28	99.8	98	99	103.3	95.9	103.9	0.979215	0.468475	16443
Q9ESW4	Agk	Acylglycerol kinase, mitochondrial OS=Mus musculus OX=10090 GN=Agk PE=1 SV=1	21	8	9	8	421	46.9	8.4	15.86	101.1	110.4	97.3	94.3	101.1	95.6	1.06117	0.250067	69923
Q9Z2N8	Actl6a	Actin-like protein 6A OS=Mus musculus OX=10090 GN=Actl6a PE=1 SV=2	17	6	7	6	429	47.4	5.6	19.17	112.3	109.8	108.3	88.8	89.4	91.5	1.22506	0.000142929	56456
G3UXA6	Ptbp3	Polypyrimidine tract-binding protein 3 OS=Mus musculus OX=10090 GN=Ptbp3 PE=1 SV=1	10	6	11	2	554	59.7	8.94	22.79	121.1	109	106.5	96	79.7	87.7	1.2779	0.0200468	230257
Q60749	Khdrbs1	KH domain-containing, RNA-binding, signal transduction-associated protein 1 OS=Mus musculus OX=10090 GN=Khdrbs1 PE=1 SV=2	9	4	7	4	443	48.3	8.72	14	113.9	108.5	105.5	92.1	87.1	93	1.20463	0.00375867	20218
Q61553	Fscn1	Fascin OS=Mus musculus OX=10090 GN=Fscn1 PE=1 SV=4	15	7	9	7	493	54.5	6.89	15.85	129	124.7	122.2	77.9	71.9	74.4	1.67663	4.37971e-05	14086
Q99KH8	Stk24	Serine/threonine-protein kinase 24 OS=Mus musculus OX=10090 GN=Stk24 PE=1 SV=1	16	7	10	3	431	47.9	5.43	13.76	102.7	104.3	104.1	100.2	90	98.7	1.07684	0.0830579	223255
A0A0N4SW28	Gng12	Guanine nucleotide-binding protein subunit gamma OS=Mus musculus OX=10090 GN=Gng12 PE=1 SV=1	36	2	7	2	83	9.2	9.25	15.89	96.8	97.5	100.3	98.3	112	95.1	0.964637	0.533678	14701
Q6S9I0	Kng2	Kininogen 2 OS=Mus musculus OX=10090 GN=Kng2 PE=1 SV=1	16	6	13	5	433	47.9	6.16	19.15	69.3	72.7	70.6	129.5	135.8	122.1	0.548787	0.000139803	385643
Q6KAR6	Exoc3	Exocyst complex component 3 OS=Mus musculus OX=10090 GN=Exoc3 PE=1 SV=2	10	7	8	7	755	86.4	6.2	12.98	93.7	95.5	94.7	107.2	101.3	107.6	0.898134	0.00695365	211446
J3QNT7	Epn2	Epsin-2 OS=Mus musculus OX=10090 GN=Epn2 PE=1 SV=1	11	6	6	6	640	68.3	7.46	16.39	90.5	87.8	88	117	103.5	113.2	0.798022	0.00545716	13855
Q9CZE3	Rab32	Ras-related protein Rab-32 OS=Mus musculus OX=10090 GN=Rab32 PE=1 SV=3	22	5	7	3	223	25.1	6.68	20.55	121.9	121	119.6	76.9	80.4	80.2	1.52632	5.95641e-06	67844
Q91Z67	Srgap2	SLIT-ROBO Rho GTPase-activating protein 2 OS=Mus musculus OX=10090 GN=Srgap2 PE=1 SV=2	10	10	11	10	1071	120.7	6.64	21.69	92	98.3	98.9	103	102.1	105.8	0.930203	0.0429839	14270
Q9CRC9	Gnpda2	Glucosamine-6-phosphate isomerase 2 OS=Mus musculus OX=10090 GN=Gnpda2 PE=1 SV=1	38	8	10	6	276	31.1	6.9	16.13	101	106.2	109.9	99.3	84.5	99.2	1.12049	0.11008	67980
Q8BHG2		UPF0587 protein C1orf123 homolog OS=Mus musculus OX=10090 PE=1 SV=1	38	5	8	5	160	18	5.12	14.81	98.8	97.5	101.4	99	103.7	99.6	0.984783	0.458204	#N/A
P97822	Anp32e	Acidic leucine-rich nuclear phosphoprotein 32 family member E OS=Mus musculus OX=10090 GN=Anp32e PE=1 SV=2	13	4	7	4	260	29.6	3.88	16.83	112.3	107.7	117	91.4	81	90.5	1.28186	0.00445652	66471
Q8VCC1	Hpgd	15-hydroxyprostaglandin dehydrogenase [NAD(+)] OS=Mus musculus OX=10090 GN=Hpgd PE=1 SV=1	26	6	10	6	269	29.2	6.54	17.77	78.1	86.4	87.4	120.3	109.1	118.8	0.723435	0.00218825	15446
Q01279	Egfr	Epidermal growth factor receptor OS=Mus musculus OX=10090 GN=Egfr PE=1 SV=1	6	6	7	6	1210	134.8	6.86	13.04	87.3	94.6	95.3	108.9	104.6	109.2	0.859002	0.00685302	13649
Q3UX10	Tubal3	Tubulin alpha chain-like 3 OS=Mus musculus OX=10090 GN=Tubal3 PE=2 SV=2	8	4	16	1	446	50	5.58	22.59							#DIV/0!	#DIV/0!	238463
Q8K337	Inpp5b	Type II inositol 1,4,5-trisphosphate 5-phosphatase OS=Mus musculus OX=10090 GN=Inpp5b PE=1 SV=1	9	8	10	8	993	112.7	5.64	15.09	98.2	99.8	99.2	100.9	102.3	99.7	0.981182	0.0981722	16330
Q8VCA8	Scrn2	Secernin-2 OS=Mus musculus OX=10090 GN=Scrn2 PE=1 SV=1	13	4	5	4	425	46.6	5.71	15.05	95.3	94.4	95.4	102.3	104	108.5	0.905654	0.00619088	217140
O08599	Stxbp1	Syntaxin-binding protein 1 OS=Mus musculus OX=10090 GN=Stxbp1 PE=1 SV=2	16	9	10	9	594	67.5	6.96	12.05	90.4	85.2	85.2	111.2	116.2	111.8	0.768868	0.00036764	20910
Q9CQR6	Ppp6c	Serine/threonine-protein phosphatase 6 catalytic subunit OS=Mus musculus OX=10090 GN=Ppp6c PE=1 SV=1	20	7	9	7	305	35.1	5.69	14.47	113.9	110.4	106.1	90.9	88.3	90.4	1.22552	0.00106379	67857
P24668	M6pr	Cation-dependent mannose-6-phosphate receptor OS=Mus musculus OX=10090 GN=M6pr PE=1 SV=1	23	5	9	5	278	31.2	5.39	19.65	111.8	114.1	112.3	83.4	90.2	88.3	1.29133	0.000288469	17113
D3Z6Z0	Snx3	Sorting nexin-3 OS=Mus musculus OX=10090 GN=Snx3 PE=1 SV=1	27	5	8	4	140	16.3	6.8	17.53	109.2	103.9	103.3	96.6	91.6	95.3	1.11605	0.0102583	54198
Q9QXB9	Drg2	Developmentally-regulated GTP-binding protein 2 OS=Mus musculus OX=10090 GN=Drg2 PE=1 SV=1	21	8	10	7	364	40.7	8.88	17.34	107.6	101.2	105.1	97.9	91.9	96.3	1.09717	0.0230873	13495
P11404	Fabp3	Fatty acid-binding protein, heart OS=Mus musculus OX=10090 GN=Fabp3 PE=1 SV=5	34	5	9	4	133	14.8	6.57	16.33	80.5	78.1	79.5	123.2	116	122.7	0.657917	6.97333e-05	14077
Q9CZ42	Naxd	ATP-dependent (S)-NAD(P)H-hydrate dehydratase OS=Mus musculus OX=10090 GN=Naxd PE=1 SV=1	22	6	7	6	343	36.7	7.77	12.45	92.4	93.3	91.2	106.4	110.7	106	0.85701	0.000688013	69225
F8VPU2	Farp1	FERM, ARHGEF and pleckstrin domain-containing protein 1 OS=Mus musculus OX=10090 GN=Farp1 PE=1 SV=1	9	9	12	9	1048	118.8	7.88	18.76	92.4	95.9	89.9	106.6	110.2	104.9	0.864781	0.003441	223254
Q8BU14	Sec62	Translocation protein SEC62 OS=Mus musculus OX=10090 GN=Sec62 PE=1 SV=1	12	5	8	5	398	45.6	7.31	13.72	110	107.2	110.4	89.5	91.1	91.7	1.20308	0.000105421	69276
Q61411	Hras	GTPase HRas OS=Mus musculus OX=10090 GN=Hras PE=1 SV=2	35	6	8	3	189	21.3	5.31	15.09	82.5	84.4	86.3	113.4	115.1	118.3	0.730104	6.60828e-05	15461
P18527		Ig heavy chain V region 914 OS=Mus musculus OX=10090 PE=1 SV=1	28	2	8	1	97	10.7	9.17	18.33	142.1	137.9	135.7	59.2	62.3	62.8	2.25556	3.87194e-06	#N/A
Q8BH79	Ano10	Anoctamin-10 OS=Mus musculus OX=10090 GN=Ano10 PE=1 SV=1	14	7	9	7	659	76.1	6.7	12.49	101.2	105.7	101.1	99	99	93.9	1.05516	0.0780492	102566
Q9JHK4	Rabggta	Geranylgeranyl transferase type-2 subunit alpha OS=Mus musculus OX=10090 GN=Rabggta PE=1 SV=1	13	8	10	8	567	64.9	5.8	21.64	106.5	106.7	107.3	89.8	97.3	92.4	1.14669	0.00348532	56187
A0A0R4J140	Cluh	Clustered mitochondria protein homolog OS=Mus musculus OX=10090 GN=Cluh PE=1 SV=1	7	10	10	10	1353	151.7	6.02	18.19	97.5	100	98.4	99.5	102.7	101.9	0.973035	0.0863949	74148
Q2EMV9	Parp14	Poly [ADP-ribose] polymerase 14 OS=Mus musculus OX=10090 GN=Parp14 PE=1 SV=3	6	10	11	10	1817	203.7	6.79	5.96	118.3	123	119.4	79.8	77.8	81.7	1.50731	2.37857e-05	547253
E9Q7B0	P4ha1	Prolyl 4-hydroxylase subunit alpha-1 OS=Mus musculus OX=10090 GN=P4ha1 PE=1 SV=1	15	6	7	6	454	51.7	6.71	13.91	111.4	105.5	106.4	92.2	92.9	91.6	1.16841	0.00115467	18451
Q99J99	Mpst	3-mercaptopyruvate sulfurtransferase OS=Mus musculus OX=10090 GN=Mpst PE=1 SV=4	28	7	11	7	297	33.1	6.47	18.39	102	97.1	100.2	99.2	102.3	99.2	0.995344	0.804546	246221
Q8BTS3	Gbp9	Guanylate-binding protein 9 OS=Mus musculus OX=10090 GN=Gbp9 PE=1 SV=1	13	8	9	5	619	71.3	5.97	18.21	106.8	102.8	110.2	94.9	90.3	95.1	1.14092	0.00767595	236573
Q6PFA2	Clta	Clathrin light chain OS=Mus musculus OX=10090 GN=Clta PE=1 SV=1	32	8	10	8	218	23.6	4.5	18.66	117.5	117.1	115.2	88.1	82.2	79.9	1.39808	0.000198683	12757
Q9QXC1	Fetub	Fetuin-B OS=Mus musculus OX=10090 GN=Fetub PE=1 SV=1	18	6	10	6	388	42.7	6.61	13.98	76	73.1	74.8	128.7	124.2	123.2	0.59532	1.14298e-05	59083
A0A1W2P750	Ppp1r12a	Protein phosphatase 1 regulatory subunit 12A (Fragment) OS=Mus musculus OX=10090 GN=Ppp1r12a PE=1 SV=1	17	7	7	1	506	57.9	8.82	10.46	76.1	78.6	89.4	99.2	157.1	99.6	0.685867	0.130935	17931
P97855	G3bp1	Ras GTPase-activating protein-binding protein 1 OS=Mus musculus OX=10090 GN=G3bp1 PE=1 SV=1	27	8	10	8	465	51.8	5.59	7.79	109.2	109.8	107.6	93.4	91.7	88.3	1.19459	0.000411746	27041
Q8K363	Ddx18	ATP-dependent RNA helicase DDX18 OS=Mus musculus OX=10090 GN=Ddx18 PE=1 SV=1	10	6	9	6	660	74.1	9.52	18.59	104.3	107	104.9	94	95.3	94.5	1.11416	0.000278657	66942
B9EJ86	Osbpl8	Oxysterol-binding protein-related protein 8 OS=Mus musculus OX=10090 GN=Osbpl8 PE=1 SV=1	11	8	10	8	889	101.2	6.96	13.59	113.6	106.8	107.1	89.6	92.8	90.1	1.20183	0.00165553	237542
D0QMC3	Mndal	Myeloid cell nuclear differentiation antigen-like protein OS=Mus musculus OX=10090 GN=Mndal PE=1 SV=1	17	8	10	3	538	60.5	9.28	10.95	107	103.9	99.6	93.6	98.3	97.7	1.07217	0.0555363	100040462
E9QAQ5	Gsk3b	Glycogen synthase kinase-3 beta OS=Mus musculus OX=10090 GN=Gsk3b PE=1 SV=1	23	7	8	5	433	48	8.78	12.55	96.7	96.7	98.8	104.6	99.7	103.5	0.949318	0.0339054	56637
Q9CT10	Ranbp3	Ran-binding protein 3 OS=Mus musculus OX=10090 GN=Ranbp3 PE=1 SV=2	13	6	10	6	491	52.5	5.12	17.18	110.5	107.2	109.7	93.4	91.7	87.5	1.20103	0.000821467	71810
P61027	Rab10	Ras-related protein Rab-10 OS=Mus musculus OX=10090 GN=Rab10 PE=1 SV=1	22	6	12	4	200	22.5	8.38	19.08	108.1	99.9	104.6	98.8	92.4	96.2	1.08768	0.0495603	19325
P45591	Cfl2	Cofilin-2 OS=Mus musculus OX=10090 GN=Cfl2 PE=1 SV=1	28	6	12	4	166	18.7	7.88	27.13	90.6	78.9	80.6	120.8	115.6	113.5	0.714776	0.00143317	12632
P28658	Atxn10	Ataxin-10 OS=Mus musculus OX=10090 GN=Atxn10 PE=1 SV=2	13	6	7	6	475	53.7	5.25	13.1	102.5	104.5	103.4	98.1	92.5	99	1.07182	0.0305076	54138
Q61581	Igfbp7	Insulin-like growth factor-binding protein 7 OS=Mus musculus OX=10090 GN=Igfbp7 PE=1 SV=3	29	8	9	1	281	29	8.31	18.72							#DIV/0!	#DIV/0!	29817
Q62383	Supt6h	Transcription elongation factor SPT6 OS=Mus musculus OX=10090 GN=Supt6h PE=1 SV=2	6	8	9	8	1726	199	4.93	12.52	110.7	105.9	105.1	92.8	94.4	91.1	1.15595	0.00190688	-
Q9D0M3	Cyc1	Cytochrome c1, heme protein, mitochondrial OS=Mus musculus OX=10090 GN=Cyc1 PE=1 SV=1	34	7	10	7	325	35.3	9.16	8.55	94.6	97.2	94.7	106.9	101.2	105.4	0.913876	0.00916069	66445
Q3UVK0	Ermp1	Endoplasmic reticulum metallopeptidase 1 OS=Mus musculus OX=10090 GN=Ermp1 PE=1 SV=2	8	7	8	7	898	100.1	7.49	11.27	104.3	106.8	99.7	96.3	98.3	94.7	1.07432	0.0368661	226090
O35490	Bhmt	Betaine--homocysteine S-methyltransferase 1 OS=Mus musculus OX=10090 GN=Bhmt PE=1 SV=1	23	7	7	7	407	45	7.9	12.54	67.7	70.5	65.3	131.5	136.2	128.9	0.513111	1.60866e-05	12116
Q9ES74	Nek7	Serine/threonine-protein kinase Nek7 OS=Mus musculus OX=10090 GN=Nek7 PE=1 SV=1	31	8	9	8	302	34.5	8.25	13.22	112.7	112.4	114.7	85.7	87.3	87.1	1.30642	7.17155e-06	59125
Q64433	Hspe1	10 kDa heat shock protein, mitochondrial OS=Mus musculus OX=10090 GN=Hspe1 PE=1 SV=2	48	5	15	5	102	11	8.35	16.39	103.4	106.1	104	94.9	96.2	95.3	1.09462	0.000564361	15528
P18872	Gnao1	Guanine nucleotide-binding protein G(o) subunit alpha OS=Mus musculus OX=10090 GN=Gnao1 PE=1 SV=3	22	7	12	5	354	40.1	5.53	20.73	76	75.7	74.5	122.7	129.8	121.3	0.605136	5.10966e-05	14681
Q9Z1K5	Arih1	E3 ubiquitin-protein ligase ARIH1 OS=Mus musculus OX=10090 GN=Arih1 PE=1 SV=3	21	10	10	10	555	64	5.08	10.33	119.3	116.5	114.1	80.1	82.4	87.6	1.39904	0.000241923	23806
Q63ZW6	Col4a5	Col4a5 protein OS=Mus musculus OX=10090 GN=Col4a5 PE=1 SV=1	3	4	9	2	1691	161.7	8.1	19.91	89.9	94.8	88.9	109	111.5	105.9	0.838235	0.0019544	12830
Q9DCT2	Ndufs3	NADH dehydrogenase [ubiquinone] iron-sulfur protein 3, mitochondrial OS=Mus musculus OX=10090 GN=Ndufs3 PE=1 SV=2	20	5	6	5	263	30.1	7.17	14.43	105.4	107.1	106.2	95.4	91.2	94.7	1.13295	0.00085243	68349
P63085	Mapk1	Mitogen-activated protein kinase 1 OS=Mus musculus OX=10090 GN=Mapk1 PE=1 SV=3	16	7	11	5	358	41.2	6.98	18.88	105.5	106.8	105.9	94.8	90.6	96.4	1.12917	0.00237926	26413
Q62219	Tgfb1i1	Transforming growth factor beta-1-induced transcript 1 protein OS=Mus musculus OX=10090 GN=Tgfb1i1 PE=1 SV=2	19	7	8	7	461	50.1	6.73	16.71	80.1	85.4	80	123.7	115.4	115.4	0.692525	0.000383031	21804
Q8BUV3	Gphn	Gephyrin OS=Mus musculus OX=10090 GN=Gphn PE=1 SV=2	10	7	8	7	769	83.2	5.6	14.89	94.1	95.2	94.4	104.2	106	106.1	0.896933	0.000100068	268566
Q71RI9	Kyat3	Kynurenine--oxoglutarate transaminase 3 OS=Mus musculus OX=10090 GN=Kyat3 PE=1 SV=1	13	5	7	5	455	51.1	8.37	12.36	79.4	80.9	80	130.5	109.8	119.4	0.668057	0.00267443	229905
P05132	Prkaca	cAMP-dependent protein kinase catalytic subunit alpha OS=Mus musculus OX=10090 GN=Prkaca PE=1 SV=3	14	6	11	3	351	40.5	8.79	20.43	95	92.9	96.6	108.6	99.7	107.2	0.901743	0.0251938	18747
F7CVJ5	Ahnak2	AHNAK nucleoprotein 2 (Fragment) OS=Mus musculus OX=10090 GN=Ahnak2 PE=1 SV=1	24	5	9	1	1126	115.2	5.59	16.87							#DIV/0!	#DIV/0!	100041194
O88325	Naglu	Alpha-N-acetylglucosaminidase OS=Mus musculus OX=10090 GN=Naglu PE=1 SV=1	11	7	8	7	739	82.5	6.61	13.13	122.1	118	114.3	82.5	77.9	85.2	1.443	0.000305628	27419
Q6NZB0	Dnajc8	DnaJ homolog subfamily C member 8 OS=Mus musculus OX=10090 GN=Dnajc8 PE=1 SV=2	25	6	8	6	253	29.8	9.06	15.33	105.7	105.6	103.5	92.3	100.4	92.5	1.10379	0.0233291	68598
D3Z7X0	Acad12	Acyl-Coenzyme A dehydrogenase family, member 12 OS=Mus musculus OX=10090 GN=Acad12 PE=1 SV=1	15	8	9	3	555	61.4	9.36	12.91	95.9	102.1	99.5	99.8	99.9	102.7	0.983796	0.466833	338350
Q8C181	Mbnl2	Muscleblind-like protein 2 OS=Mus musculus OX=10090 GN=Mbnl2 PE=2 SV=2	12	5	10	2	373	40.1	9	23.75	104.2	107.2	109.6	91.6	96.6	90.7	1.15095	0.00433138	105559
Q8K3J1	Ndufs8	NADH dehydrogenase [ubiquinone] iron-sulfur protein 8, mitochondrial OS=Mus musculus OX=10090 GN=Ndufs8 PE=1 SV=1	26	5	6	5	212	24	6.21	15.92	97.8	99.7	98	101.2	101.3	102.1	0.970125	0.0104176	225887
Q9D1P4	Chordc1	Cysteine and histidine-rich domain-containing protein 1 OS=Mus musculus OX=10090 GN=Chordc1 PE=1 SV=1	30	6	6	6	331	37.3	7.9	11.43	105.9	106.7	101.9	90	92.4	103.1	1.10158	0.0874128	66917
Q6NVE8	Wdr44	WD repeat-containing protein 44 OS=Mus musculus OX=10090 GN=Wdr44 PE=1 SV=1	9	7	7	7	915	101.5	5.24	16.5	91.3	93.3	93.7	113.7	99.7	108.3	0.865092	0.0250914	72404
F8VPK0	Ttc37	Tetratricopeptide repeat domain 37 OS=Mus musculus OX=10090 GN=Ttc37 PE=1 SV=1	7	10	10	10	1563	173.8	7.12	10.85	98.1	103.7	103.3	96.3	101.7	96.9	1.03459	0.243005	218343
A2A9M4	Dock7	Dedicator of cytokinesis protein 7 OS=Mus musculus OX=10090 GN=Dock7 PE=1 SV=2	5	10	12	9	2130	241.3	6.76	14.32	95.2	92.9	95.2	106.1	102.4	108.2	0.894537	0.00392216	67299
F8VPN4	Agl	Amylo-1,6-glucosidase, 4-alpha-glucanotransferase OS=Mus musculus OX=10090 GN=Agl PE=1 SV=1	6	8	9	8	1532	174.2	6.74	14.65	106.6	106.3	111	92.1	90.4	93.5	1.17355	0.000825265	77559
Q8BH43	Wasf2	Wiskott-Aldrich syndrome protein family member 2 OS=Mus musculus OX=10090 GN=Wasf2 PE=1 SV=1	10	5	7	5	497	54	5.53	20.49	88.3	89.4	90.7	102	122.9	106.7	0.809409	0.0297089	242687
Q9Z2L7	Crlf3	Cytokine receptor-like factor 3 OS=Mus musculus OX=10090 GN=Crlf3 PE=1 SV=1	14	7	8	7	442	49.5	5.03	20.15	119.9	119.5	118.7	74.5	87.7	79.8	1.47975	0.00055154	54394
Q9CRA5	Golph3	Golgi phosphoprotein 3 OS=Mus musculus OX=10090 GN=Golph3 PE=1 SV=1	16	3	5	3	298	33.7	6.44	11.87	121.9	113.5	111	84.4	82.2	86.9	1.36647	0.000967174	66629
Q9D517	Agpat3	1-acyl-sn-glycerol-3-phosphate acyltransferase gamma OS=Mus musculus OX=10090 GN=Agpat3 PE=1 SV=2	13	5	8	5	376	43.3	8.51	15.35	102.9	97.5	104.4	98.8	95.1	101.3	1.03252	0.311215	28169
L7N466	Mthfsl	5-formyltetrahydrofolate cyclo-ligase OS=Mus musculus OX=10090 GN=Mthfsl PE=1 SV=1	39	7	9	7	203	23.2	6.7	18.11	106.4	109.4	108.4	89.8	95	91.1	1.17506	0.000853365	100039707
A0A1W2P7I2	Epb41l2	Band 4.1-like protein 2 OS=Mus musculus OX=10090 GN=Epb41l2 PE=1 SV=1	46	7	9	1	201	22.5	5.17	20.2	77.1	84.5	71.5	121.3	112.5	133	0.635496	0.00317124	13822
Q9Z1P6	Ndufa7	NADH dehydrogenase [ubiquinone] 1 alpha subcomplex subunit 7 OS=Mus musculus OX=10090 GN=Ndufa7 PE=1 SV=3	48	5	9	5	113	12.6	10.17	21.22	104	98.7	103.8	95.5	98.9	99	1.04465	0.103862	66416
P63024	Vamp3	Vesicle-associated membrane protein 3 OS=Mus musculus OX=10090 GN=Vamp3 PE=1 SV=1	39	4	6	4	103	11.5	8.5	11.92	105.4	97.1	91.7	101.6	105.1	99.2	0.961752	0.419358	22319
Q99JR5	Tinagl1	Tubulointerstitial nephritis antigen-like OS=Mus musculus OX=10090 GN=Tinagl1 PE=1 SV=1	13	5	11	5	466	52.6	6.77	16.68	87.7	94.8	88.2	108.3	111.4	109.5	0.822296	0.00136979	94242
Q9CQC2	Clps	Colipase OS=Mus musculus OX=10090 GN=Clps PE=1 SV=1	39	4	11	4	113	12.4	7.8	26.62	39.7	44.1	43.9	152.2	164.4	155.7	0.270379	7.91461e-06	109791
E9Q1Y3	Apob	Apolipoprotein B-100 (Fragment) OS=Mus musculus OX=10090 GN=Apob PE=1 SV=1	3	11	11	11	4456	503.6	6.83	7.44	84.2	82.1	90.5	113.1	111.8	118.3	0.748252	0.00085548	238055
Q9QXT0	Cnpy2	Protein canopy homolog 2 OS=Mus musculus OX=10090 GN=Cnpy2 PE=1 SV=1	35	6	9	6	182	20.8	5.07	14.95	107.7	112.7	112.1	88.9	91	87.6	1.24299	0.000311495	56530
E9Q8N5	Clasp2	CLIP-associating protein 2 OS=Mus musculus OX=10090 GN=Clasp2 PE=1 SV=1	10	10	10	5	1286	140.6	8.63	7.63	102.2	98.5	102.3	96.6	97.1	103.2	1.02055	0.455383	76499
P62270	Rps18	40S ribosomal protein S18 OS=Mus musculus OX=10090 GN=Rps18 PE=1 SV=3	38	8	15	8	152	17.7	10.99	20.2	105.2	102.2	102.6	97.8	95.1	97.1	1.06897	0.00579145	20084
Q9R1J0	Nsdhl	Sterol-4-alpha-carboxylate 3-dehydrogenase, decarboxylating OS=Mus musculus OX=10090 GN=Nsdhl PE=1 SV=1	16	5	6	5	362	40.7	7.85	15.18	106.1	105	103.6	95.3	93.6	96.4	1.10305	0.000845184	18194
Q8R1H0	Hopx	Homeodomain-only protein OS=Mus musculus OX=10090 GN=Hopx PE=1 SV=1	49	4	8	4	73	8.3	4.88	9.71	86.2	85.2	84.3	116.5	110	117.7	0.742882	0.000274538	74318
P25799	Nfkb1	Nuclear factor NF-kappa-B p105 subunit OS=Mus musculus OX=10090 GN=Nfkb1 PE=1 SV=2	10	7	7	7	971	105.5	5.39	11.88	108.4	108.3	107.7	91	93.7	90.8	1.1775	7.06462e-05	18033
Q2TPA8	Hsdl2	Hydroxysteroid dehydrogenase-like protein 2 OS=Mus musculus OX=10090 GN=Hsdl2 PE=1 SV=1	14	7	8	7	490	54.2	6.74	19.75	97.1	97.7	96.1	102	105.7	101.4	0.941119	0.0130263	72479
Q9CRD2	Emc2	ER membrane protein complex subunit 2 OS=Mus musculus OX=10090 GN=Emc2 PE=1 SV=1	13	5	7	5	297	34.9	6.81	19.76	91.7	99.3	95.1	109.7	102.5	101.7	0.911437	0.051038	66736
P26369	U2af2	Splicing factor U2AF 65 kDa subunit OS=Mus musculus OX=10090 GN=U2af2 PE=1 SV=3	19	7	10	7	475	53.5	9.09	12.13	105.7	110.7	110.8	92.9	91.7	88.2	1.19941	0.00117334	22185
E9Q5D9	Igfbp7	Insulin-like growth factor-binding protein 7 OS=Mus musculus OX=10090 GN=Igfbp7 PE=1 SV=1	25	8	10	1	313	32.8	8.35	18.14	95.1	99.8	98.4	96.4	107.1	103.2	0.956309	0.26191	29817
Q8CI75	Dis3l2	DIS3-like exonuclease 2 OS=Mus musculus OX=10090 GN=Dis3l2 PE=1 SV=1	10	8	9	8	870	97.7	5.9	15.01	102.1	98.2	97.4	101.9	102.8	97.7	0.984458	0.504619	208718
Q9ET22	Dpp7	Dipeptidyl peptidase 2 OS=Mus musculus OX=10090 GN=Dpp7 PE=1 SV=2	11	4	6	4	506	56.2	5.39	12.19	109.2	108.3	114.7	89.3	89.8	88.8	1.24001	0.00044745	83768
Q9QYJ3	Dnajb1	DnaJ homolog subfamily B member 1 OS=Mus musculus OX=10090 GN=Dnajb1 PE=1 SV=3	21	7	9	7	340	38.1	8.63	11.32	104.5	103.8	107.2	93.5	98.4	92.6	1.10896	0.00764959	81489
Q8BQ46	Taf15	TAF15 RNA polymerase II, TATA box binding protein (TBP)-associated factor OS=Mus musculus OX=10090 GN=Taf15 PE=1 SV=1	15	6	9	4	557	58.6	8.4	14.17	103.7	105.1	107.6	96	96.6	91	1.11566	0.00659903	70439
P59764	Dock4	Dedicator of cytokinesis protein 4 OS=Mus musculus OX=10090 GN=Dock4 PE=1 SV=1	5	10	11	10	1978	226.4	7.65	14.54	93.6	97.3	90.8	105.5	106.9	105.8	0.885292	0.00323622	238130
P68037	Ube2l3	Ubiquitin-conjugating enzyme E2 L3 OS=Mus musculus OX=10090 GN=Ube2l3 PE=1 SV=1	29	5	10	5	154	17.9	8.51	17.29	112.4	110.4	109.8	89.9	88.4	89.1	1.24383	1.7255e-05	22195
Q922H4	Gmppa	Mannose-1-phosphate guanyltransferase alpha OS=Mus musculus OX=10090 GN=Gmppa PE=1 SV=1	18	5	8	5	420	46.2	7.62	15.05	105.8	109.5	105.9	89.4	97.5	91.9	1.15208	0.00624811	69080
Q91YS7	Map2k2	Dual-specificity mitogen-activated protein kinase kinase 2 OS=Mus musculus OX=10090 GN=Map2k2 PE=1 SV=1	18	7	9	3	400	44.3	7.05	12.1	105.7	104.5	100.2	97.2	92.3	100.1	1.07182	0.0699856	26396
Q8BGC4	Zadh2	Prostaglandin reductase-3 OS=Mus musculus OX=10090 GN=Zadh2 PE=1 SV=1	21	7	9	7	377	40.5	7.42	16.04	123.7	125.4	125.5	76.4	74.1	74.9	1.66193	6.194e-07	225791
P55302	Lrpap1	Alpha-2-macroglobulin receptor-associated protein OS=Mus musculus OX=10090 GN=Lrpap1 PE=1 SV=1	22	8	11	8	360	42.2	7.87	18.75	106.7	109.4	107.5	95.9	87.9	92.5	1.17119	0.00301016	16976
P70202	Lxn	Latexin OS=Mus musculus OX=10090 GN=Lxn PE=1 SV=2	18	3	7	3	222	25.5	5.74	19.06	104	100	100.9	95.9	99.4	99.9	1.03286	0.137819	17035
Q9D0M1	Prpsap1	Phosphoribosyl pyrophosphate synthase-associated protein 1 OS=Mus musculus OX=10090 GN=Prpsap1 PE=1 SV=1	26	7	8	6	356	39.4	7.2	9.45	96.3	101.7	97.9	102.7	98.9	102.5	0.973035	0.247844	67763
Q6P5H2	Nes	Nestin OS=Mus musculus OX=10090 GN=Nes PE=1 SV=1	7	10	11	10	1864	207	4.34	8.14	83.7	85.8	80.8	116	125.8	107.9	0.715756	0.00351379	18008
Q9ERS2	Ndufa13	NADH dehydrogenase [ubiquinone] 1 alpha subcomplex subunit 13 OS=Mus musculus OX=10090 GN=Ndufa13 PE=1 SV=3	33	4	11	4	144	16.8	9.48	16.58	101.8	97.7	97.8	98.2	96.9	107.7	0.981836	0.64293	67184
Q9D906	Atg7	Ubiquitin-like modifier-activating enzyme ATG7 OS=Mus musculus OX=10090 GN=Atg7 PE=1 SV=1	9	7	10	7	698	77.5	6.4	16.25	117.5	121.7	120.1	79.2	81.8	79.7	1.49273	1.10668e-05	74244
Q9JMC3	Dnaja4	DnaJ homolog subfamily A member 4 OS=Mus musculus OX=10090 GN=Dnaja4 PE=1 SV=1	13	5	6	5	397	44.9	7.58	14.82	89.8	93.2	94.6	107.7	109.4	105.4	0.860775	0.00123496	58233
Q9EST5	Anp32b	Acidic leucine-rich nuclear phosphoprotein 32 family member B OS=Mus musculus OX=10090 GN=Anp32b PE=1 SV=1	27	6	10	3	272	31.1	4.01	22.4	117.8	120.9	122.2	83.8	72.1	83.2	1.50941	0.0005417	67628
Q9QXH4	Itgax	Integrin alpha-X OS=Mus musculus OX=10090 GN=Itgax PE=1 SV=1	9	9	10	9	1169	129.1	6.64	5.99	121	125.6	124	77.6	77	74.7	1.61622	8.17069e-06	16411
Q3UV17	Krt76	Keratin, type II cytoskeletal 2 oral OS=Mus musculus OX=10090 GN=Krt76 PE=1 SV=1	9	8	14	1	594	62.8	8.43	22.28	85.8	85	75.2	121.1	123.2	109.8	0.694719	0.00258263	77055
Q8BSH9	Nap1l1	Nucleosome assembly protein 1-like 1 OS=Mus musculus OX=10090 GN=Nap1l1 PE=1 SV=1	18	7	10	6	383	44.6	4.56	14.96	108.7	104.3	110	96.4	85.8	94.8	1.16606	0.0146266	53605
A0A0J9YTU3	Specc1	Cytospin-B OS=Mus musculus OX=10090 GN=Specc1 PE=1 SV=1	8	8	8	8	1058	117	6.57	14.69	101.6	109.9	101.4	95.1	96.1	95.9	1.08986	0.0379292	432572
Q9CQ54	Ndufc2	NADH dehydrogenase [ubiquinone] 1 subunit C2 OS=Mus musculus OX=10090 GN=Ndufc2 PE=1 SV=1	35	5	8	5	120	14.2	9.2	16.62	105.8	108.9	104.5	91.6	94.8	94.4	1.13675	0.00148197	68197
P97457	Mylpf	Myosin regulatory light chain 2, skeletal muscle isoform OS=Mus musculus OX=10090 GN=Mylpf PE=1 SV=3	36	6	8	6	169	18.9	4.92	19.37	35.1	37.3	35.7	174.9	151.8	165.2	0.21976	4.50859e-05	17907
A6H644	Ppp1r12b	MCG130490 OS=Mus musculus OX=10090 GN=Ppp1r12b PE=1 SV=1	7	6	8	5	992	110.9	5.74	15.03	92.2	95.6	91.6	111.8	102.6	106.2	0.871491	0.0096479	329251
Q8BP40	Acp6	Lysophosphatidic acid phosphatase type 6 OS=Mus musculus OX=10090 GN=Acp6 PE=1 SV=1	15	5	6	5	418	47.6	7.72	13.12	95.7	95.9	103	104	99.1	102.3	0.964637	0.267582	66659
Q61191	Hcfc1	Host cell factor 1 OS=Mus musculus OX=10090 GN=Hcfc1 PE=1 SV=2	5	7	7	7	2045	210.3	7.18	10.25	95.8	102.7	107.5	101.4	96.3	96.3	1.04082	0.351598	15161
E9Q804	Ankrd17	Ankyrin repeat domain-containing protein 17 OS=Mus musculus OX=10090 GN=Ankrd17 PE=1 SV=3	3	7	8	3	2602	274	6.52	7.71	111.3	106.9	109.6	89.6	90.5	92.2	1.20382	0.000242365	81702
Q8BFZ9	Erlin2	Erlin-2 OS=Mus musculus OX=10090 GN=Erlin2 PE=1 SV=1	26	7	10	6	340	37.8	5.5	10.57	105.4	105.3	104.9	94.9	95.2	94.4	1.10931	3.12761e-06	244373
Q8BVE3	Atp6v1h	V-type proton ATPase subunit H OS=Mus musculus OX=10090 GN=Atp6v1h PE=1 SV=1	17	6	9	6	483	55.8	6.61	7.92	115.3	118.9	113.3	81.8	90.9	79.8	1.37624	0.00112005	108664
E9QJT5	Acyp1	Acylphosphatase OS=Mus musculus OX=10090 GN=Acyp1 PE=1 SV=1	27	5	6	5	157	17.3	9.13	12.21	101.4	94.7	100.2	105.9	88.5	109.3	0.975634	0.733817	66204
F8WIK0	Ciapin1	Anamorsin OS=Mus musculus OX=10090 GN=Ciapin1 PE=1 SV=2	33	8	8	8	309	33.4	5.2	11.19	96.2	100	97	101	104.9	100.9	0.955671	0.0609163	109006
Q9R1P3	Psmb2	Proteasome subunit beta type-2 OS=Mus musculus OX=10090 GN=Psmb2 PE=1 SV=1	27	5	8	5	201	22.9	7.02	19.5	114.9	109.3	111.5	90.7	85.3	88.2	1.27063	0.000453911	26445
P60867	Rps20	40S ribosomal protein S20 OS=Mus musculus OX=10090 GN=Rps20 PE=1 SV=1	33	4	13	4	119	13.4	9.94	20.09	102.9	101.6	99.2	93.3	108.8	94.2	1.02497	0.6563	67427
Q6P8P8	Sftpc	Pulmonary surfactant-associated protein C OS=Mus musculus OX=10090 GN=Sftpc PE=1 SV=1	15	2	8	2	193	21	6.52	14.68	94.3	103.4	98.6	94.3	102.4	107	0.975634	0.616409	20389
P97363	Sptlc2	Serine palmitoyltransferase 2 OS=Mus musculus OX=10090 GN=Sptlc2 PE=1 SV=2	12	7	8	7	560	62.9	8.18	16.06	103.9	99.3	107.7	95.4	93.1	100.5	1.07578	0.0892257	20773
A0A0R4J069	Scly	Selenocysteine lyase OS=Mus musculus OX=10090 GN=Scly PE=1 SV=1	14	6	7	6	432	47.2	6.67	14.18	109.1	111.5	102.9	90.8	86.9	98.9	1.16956	0.0231386	50880
P97501	Fmo3	Dimethylaniline monooxygenase [N-oxide-forming] 3 OS=Mus musculus OX=10090 GN=Fmo3 PE=1 SV=1	12	6	7	6	534	60.5	8.37	14.6	70.7	75.7	76.8	122.3	121.3	133.3	0.5922	0.000278595	14262
Q91W89	Man2c1	Alpha-mannosidase 2C1 OS=Mus musculus OX=10090 GN=Man2c1 PE=1 SV=1	7	5	7	5	1039	115.6	6.51	13.62	99.9	106.8	98.7	95.4	97.6	101.7	1.03631	0.317682	73744
Q9Z0P5	Twf2	Twinfilin-2 OS=Mus musculus OX=10090 GN=Twf2 PE=1 SV=1	26	8	9	7	349	39.4	6.8	14.76	106.8	112.6	106.9	91.6	94	88.2	1.19175	0.00236286	23999
Q9Z1D1	Eif3g	Eukaryotic translation initiation factor 3 subunit G OS=Mus musculus OX=10090 GN=Eif3g PE=1 SV=2	22	7	10	7	320	35.6	5.9	18.6	93.2	97.4	95.8	99.2	114.7	99.7	0.913265	0.158053	53356
Q8VE47	Uba5	Ubiquitin-like modifier-activating enzyme 5 OS=Mus musculus OX=10090 GN=Uba5 PE=1 SV=2	21	7	8	7	403	44.8	4.96	14.41	102.9	97.7	102.1	97.8	99.4	100.1	1.01816	0.362799	66663
P31750	Akt1	RAC-alpha serine/threonine-protein kinase OS=Mus musculus OX=10090 GN=Akt1 PE=1 SV=2	24	9	9	7	480	55.7	5.9	14.36	107	104.5	108.9	91.3	91	97.3	1.14592	0.0048935	11651
I7HLV2	Rpl10	60S ribosomal protein L10 (Fragment) OS=Mus musculus OX=10090 GN=Rpl10 PE=1 SV=1	24	6	12	6	201	23.1	10.01	19.55	104.9	101.4	102.4	95.9	96.4	98.9	1.0601	0.0138813	110954
G3X8U3	2210016F16Rik	Queuosine salvage protein OS=Mus musculus OX=10090 GN=2210016F16Rik PE=1 SV=1	19	6	8	6	338	38.6	5.64	15.87	105	103.5	108.1	92.5	94.1	96.7	1.11754	0.00369672	70153
P05063	Aldoc	Fructose-bisphosphate aldolase C OS=Mus musculus OX=10090 GN=Aldoc PE=1 SV=4	16	7	7	3	363	39.4	7.12	16.76	106.7	121	102.4	88.4	92.5	89	1.22305	0.0253426	11676
Q9WVJ3	Cpq	Carboxypeptidase Q OS=Mus musculus OX=10090 GN=Cpq PE=1 SV=1	12	6	9	6	470	51.8	6.21	11.17	105	133.9	109.1	84.6	82.8	84.5	1.3815	0.0239951	54381
E9Q1F5	Myo5c	Myosin VC OS=Mus musculus OX=10090 GN=Myo5c PE=1 SV=1	5	9	9	5	1742	202.6	7.59	15.8	94.8	94.5	101.2	104.6	91	114	0.938307	0.416028	208943
P42230	Stat5a	Signal transducer and activator of transcription 5A OS=Mus musculus OX=10090 GN=Stat5a PE=1 SV=1	10	9	10	1	793	90.8	6.39	12.33	113	111.2	111.2	78	103.5	83.1	1.26757	0.0391466	20850
Q542V3	Srsf4	Serine/arginine-rich-splicing factor 4 OS=Mus musculus OX=10090 GN=Srsf4 PE=1 SV=1	14	7	9	3	491	56.2	11.37	17.55	96.6	109.2	107.4	94.3	93.4	99.1	1.09205	0.110956	57317
P12246	Apcs	Serum amyloid P-component OS=Mus musculus OX=10090 GN=Apcs PE=1 SV=2	22	4	6	4	224	26.2	6.35	19.36	52.8	54.2	54.2	155.6	136.9	146.2	0.367449	6.90548e-05	20219
P57759	Erp29	Endoplasmic reticulum resident protein 29 OS=Mus musculus OX=10090 GN=Erp29 PE=1 SV=2	17	4	9	4	262	28.8	6.15	10.12	126	122.3	122.5	74.3	75.6	79.2	1.61851	1.53804e-05	67397
Q9DB15	Mrpl12	39S ribosomal protein L12, mitochondrial OS=Mus musculus OX=10090 GN=Mrpl12 PE=1 SV=2	25	5	7	5	201	21.7	9.29	10	97.3	96.5	97.2	108.7	103.4	96.8	0.942052	0.158897	56282
Q61712	Dnajc1	DnaJ homolog subfamily C member 1 OS=Mus musculus OX=10090 GN=Dnajc1 PE=1 SV=1	9	5	8	5	552	63.8	8.97	15.58	105.2	104.5	99.8	99.1	95.8	95.5	1.06577	0.036047	13418
Q60973	Rbbp7	Histone-binding protein RBBP7 OS=Mus musculus OX=10090 GN=Rbbp7 PE=1 SV=1	20	7	7	2	425	47.8	5.05	19.22	108.9	110.4	129.4	80.3	82.5	88.6	1.38703	0.0100233	245688
Q9WV92	Epb41l3	Band 4.1-like protein 3 OS=Mus musculus OX=10090 GN=Epb41l3 PE=1 SV=1	9	7	10	4	929	103.3	5.31	17.15	92	97.5	92.3	113.6	107.8	96.8	0.885607	0.0815413	13823
Q9JMH6	Txnrd1	Thioredoxin reductase 1, cytoplasmic OS=Mus musculus OX=10090 GN=Txnrd1 PE=1 SV=3	10	6	7	6	613	67	7.44	13.99	111.1	111.1	109.6	88.6	88.1	91.5	1.23714	5.4899e-05	50493
P52430	Pon1	Serum paraoxonase/arylesterase 1 OS=Mus musculus OX=10090 GN=Pon1 PE=1 SV=2	14	5	7	4	355	39.5	5.22	13.11	77.4	72	76.9	129.4	117.3	127	0.605566	0.000272715	18979
Q6IFZ6	Krt77	Keratin, type II cytoskeletal 1b OS=Mus musculus OX=10090 GN=Krt77 PE=1 SV=1	9	7	10	2	572	61.3	8.02	12.95	81.1	90.6	86.4	117.9	104.5	119.5	0.754899	0.00705441	406220
Q8BKZ9	Pdhx	Pyruvate dehydrogenase protein X component, mitochondrial OS=Mus musculus OX=10090 GN=Pdhx PE=1 SV=1	20	8	8	8	501	54	7.75	14.04	105.1	100.7	96.5	100.4	104.1	93.2	1.01545	0.724246	27402
Q80ZJ1	Rap2a	Ras-related protein Rap-2a OS=Mus musculus OX=10090 GN=Rap2a PE=1 SV=2	29	5	9	3	183	20.6	4.82	14.82	90.9	91.6	90.4	109.1	109.1	108.9	0.834301	8.85519e-07	76108
Q9D4H1	Exoc2	Exocyst complex component 2 OS=Mus musculus OX=10090 GN=Exoc2 PE=1 SV=1	9	6	8	6	924	103.9	7.18	6.86	99.6	93.4	98.8	100.5	96	111.7	0.946788	0.340561	66482
Q6P9J9	Ano6	Anoctamin-6 OS=Mus musculus OX=10090 GN=Ano6 PE=1 SV=1	9	7	8	7	911	106.2	6.76	17.42	88.1	98.8	94.2	108	106	104.8	0.881744	0.0177976	105722
Q8C2Q3	Rbm14	RNA-binding protein 14 OS=Mus musculus OX=10090 GN=Rbm14 PE=1 SV=1	12	7	9	7	669	69.4	9.67	13.51	97.5	102.1	97.2	104.7	100.9	97.6	0.978892	0.456836	56275
Q3U5Q7	Cmpk2	UMP-CMP kinase 2, mitochondrial OS=Mus musculus OX=10090 GN=Cmpk2 PE=1 SV=2	14	6	7	6	447	50	7.27	14.28	115.6	116.7	111.7	86.3	85.9	83.7	1.34428	6.88383e-05	22169
F8VQ87	Xrn1	5'-3' exoribonuclease 1 OS=Mus musculus OX=10090 GN=Xrn1 PE=1 SV=1	5	7	8	7	1723	194.6	7.62	9.35	104.4	109.8	103.5	90.1	98	94.2	1.1254	0.0172855	24127
Q9Z247	Fkbp9	Peptidyl-prolyl cis-trans isomerase FKBP9 OS=Mus musculus OX=10090 GN=Fkbp9 PE=1 SV=1	12	7	9	7	570	63	5.21	19.34	91.8	88.6	93.5	106.7	107.9	111.5	0.839926	0.0010281	27055
A0A0G2JES3	Rpl9	60S ribosomal protein L9 (Fragment) OS=Mus musculus OX=10090 GN=Rpl9 PE=1 SV=1	21	5	7	5	191	21.7	9.91	17.5	100.3	101.9	97.3	101	102.6	96.8	0.997004	0.897795	20005
Q9CS42	Prps2	Ribose-phosphate pyrophosphokinase 2 OS=Mus musculus OX=10090 GN=Prps2 PE=1 SV=4	18	6	7	3	318	34.8	6.61	16.25	97.1	89.5	94.9	88.3	142.6	87.5	0.884108	0.539883	110639
P54729	Nub1	NEDD8 ultimate buster 1 OS=Mus musculus OX=10090 GN=Nub1 PE=1 SV=2	13	7	7	7	614	70.3	5.88	15.84	101.6	101.8	98.3	99.1	93	106.2	1.0114	0.789934	53312
Q9CQC9	Sar1b	GTP-binding protein SAR1b OS=Mus musculus OX=10090 GN=Sar1b PE=1 SV=1	22	5	10	1	198	22.4	6.11	18.1	122.5	109.9	113.1	85.7	80.4	88.4	1.35756	0.00242496	66397
F8WJ93	Eml4	Echinoderm microtubule-associated protein-like 4 OS=Mus musculus OX=10090 GN=Eml4 PE=1 SV=1	8	6	7	5	988	109.9	6.49	10.09	110	114.1	110.8	86	90.3	88.9	1.26282	0.000200031	78798
Q8K2L8	Trappc12	Trafficking protein particle complex subunit 12 OS=Mus musculus OX=10090 GN=Trappc12 PE=1 SV=2	14	10	10	10	797	87.6	4.81	7.22	100.9	94.3	104.8	101.5	92.2	106.2	1.00033	0.995126	217449
F6RJV6	Lancl2	LanC-like protein 2 (Fragment) OS=Mus musculus OX=10090 GN=Lancl2 PE=1 SV=1	15	5	8	5	441	49.7	7.14	10.41	99.1	97.3	104.1	103	93.9	102.6	1.00334	0.930659	71835
Q8R4N0	Clybl	Citramalyl-CoA lyase, mitochondrial OS=Mus musculus OX=10090 GN=Clybl PE=1 SV=2	20	6	8	6	338	37.5	8.54	8.02	86.1	86.1	85.2	113.4	118.2	111	0.751313	0.000185559	69634
O55142	Rpl35a	60S ribosomal protein L35a OS=Mus musculus OX=10090 GN=Rpl35a PE=1 SV=2	34	4	12	4	110	12.5	10.89	23.6	102	97.3	101.4	95.7	96.4	107.2	1.00468	0.912843	57808
Q9CQM8	Rpl21	60S ribosomal protein L21 OS=Mus musculus OX=10090 GN=Rpl21 PE=1 SV=1	31	6	11	6	160	18.6	10.49	15.2	102.7	101.4	99.3	95.1	103.4	98.1	1.02293	0.435901	19933
Q8R0H9	Gga1	ADP-ribosylation factor-binding protein GGA1 OS=Mus musculus OX=10090 GN=Gga1 PE=1 SV=1	11	8	11	8	635	69.9	5.27	15.87	101.5	101.7	100.3	97	99.4	100	1.02395	0.0801915	106039
Q8R0B4	Tardbp	MCG16669, isoform CRA_a OS=Mus musculus OX=10090 GN=Tardbp PE=1 SV=1	22	6	10	6	295	33.3	7.06	8.14	122.4	119	116.8	83.7	77.3	80.7	1.482	9.46895e-05	230908
Q9CR57	Rpl14	60S ribosomal protein L14 OS=Mus musculus OX=10090 GN=Rpl14 PE=1 SV=3	18	4	8	4	217	23.5	11.02	18.91	105.1	101.1	103.9	100.4	93.6	95.9	1.06968	0.0441332	67115
P47739	Aldh3a1	Aldehyde dehydrogenase, dimeric NADP-preferring OS=Mus musculus OX=10090 GN=Aldh3a1 PE=1 SV=2	18	8	9	7	453	50.4	6.95	12.74	76.9	74.7	75.7	123.6	124	125	0.610038	3.63398e-07	11670
P70297	Stam	Signal transducing adapter molecule 1 OS=Mus musculus OX=10090 GN=Stam PE=1 SV=3	11	6	9	6	548	59.7	4.84	15.68	93.2	92.9	91	106.8	109.1	107	0.85816	0.00011068	20844
Q9DC16	Ergic1	Endoplasmic reticulum-Golgi intermediate compartment protein 1 OS=Mus musculus OX=10090 GN=Ergic1 PE=1 SV=1	18	5	8	5	290	32.5	7.06	14.33	124.3	127.6	118.8	72.6	78.2	78.6	1.61595	0.000126369	67458
P35762	Cd81	CD81 antigen OS=Mus musculus OX=10090 GN=Cd81 PE=1 SV=2	21	3	7	3	236	25.8	5.83	12.73	91.4	90.6	89.3	112.3	104	112.3	0.825624	0.00252435	12520
Q7TMQ7	Wdr91	WD repeat-containing protein 91 OS=Mus musculus OX=10090 GN=Wdr91 PE=1 SV=1	9	6	8	6	748	83.4	6.64	12.04	100.8	110.3	103.9	92.6	95.2	97.1	1.10565	0.0313442	101240
P97496	Smarcc1	SWI/SNF complex subunit SMARCC1 OS=Mus musculus OX=10090 GN=Smarcc1 PE=1 SV=2	5	6	9	1	1104	122.8	5.73	21.15	117.5	121.3	131.9	77.7	78.1	73.6	1.61595	0.000488316	20588
Q80VD1	Fam98b	Protein FAM98B OS=Mus musculus OX=10090 GN=Fam98b PE=1 SV=1	13	5	8	4	429	45.3	8.5	18.02	102.6	108.1	108.5	94.4	91.8	94.6	1.13675	0.00370531	68215
G3X925	Pklr	Pyruvate kinase OS=Mus musculus OX=10090 GN=Pklr PE=1 SV=1	10	6	16	4	574	62.2	7.09	37.85	83.1	82.4	81	121.2	113.9	118.3	0.69751	8.65564e-05	18770
Q922H2	Pdk3	[Pyruvate dehydrogenase (acetyl-transferring)] kinase isozyme 3, mitochondrial OS=Mus musculus OX=10090 GN=Pdk3 PE=1 SV=1	18	7	9	7	415	47.9	8.82	15.87	103.4	106.3	105.3	96.4	93.7	94.9	1.10526	0.000978089	236900
Q99KP6	Prpf19	Pre-mRNA-processing factor 19 OS=Mus musculus OX=10090 GN=Prpf19 PE=1 SV=1	12	6	9	6	504	55.2	6.61	11.62	115.1	109.8	108.9	89.2	87.2	89.9	1.25347	0.000427286	28000
Q9DCJ5	Ndufa8	NADH dehydrogenase [ubiquinone] 1 alpha subcomplex subunit 8 OS=Mus musculus OX=10090 GN=Ndufa8 PE=1 SV=3	24	3	7	3	172	20	8.46	10.26	105.3	111.6	106.1	96.4	93.5	87.2	1.16564	0.0103989	68375
O35841	Api5	Apoptosis inhibitor 5 OS=Mus musculus OX=10090 GN=Api5 PE=1 SV=2	13	7	14	7	504	56.8	5.92	20.3	116.1	113.5	115.1	85.2	84.7	85.5	1.34965	2.99774e-06	11800
Q5S006	Lrrk2	Leucine-rich repeat serine/threonine-protein kinase 2 OS=Mus musculus OX=10090 GN=Lrrk2 PE=1 SV=2	4	9	10	9	2527	284.5	6.83	6.04	109.5	119.2	111.6	84.4	91.7	83.7	1.30985	0.00234244	66725
P58389	Ptpa	Serine/threonine-protein phosphatase 2A activator OS=Mus musculus OX=10090 GN=Ptpa PE=1 SV=1	17	6	11	6	323	36.7	6.39	22.54	108.8	105.8	104.4	99.1	87.1	94.8	1.13523	0.0276666	110854
Q9CXF4	Tbc1d15	TBC1 domain family member 15 OS=Mus musculus OX=10090 GN=Tbc1d15 PE=1 SV=1	7	5	7	5	671	76.5	5.3	16.27	103.5	103	108.7	98.7	93.1	93	1.10674	0.0180483	66687
[truncated: 4,401 more rows]
